# Supplementary material for: Immunoglobulin kappa light chain produced by cardiomyocytes and participates in maintaining intercalated disc integrity
Source: Research Square preprint supplement (doi:10.21203/rs.3.rs-114990/v1), 2020-12-02
Supplement: Supplementary file 1 [file 4291605b8b62f0bb20b1a210.docx]

|  | **barcode-F** | **barcode-R** |
| --- | --- | --- |
| 1 | atcacg | atgagc |
| 2 | cgatgt | attcct |
| 3 | ttaggc | caaaag |
| 4 | tgacca | caacta |
| 5 | acagtg | caccgg |
| 6 | gccaat | cacgat |
| 7 | cagatc | cactca |
| 8 | acttga | caggcg |
| 9 | gatcag | catggc |
| 10 | tagctt | catttt |
| 11 | agtcaa | ctagct |
| 12 | agttcc | ctatac |
| 13 | atgtca | ctcaga |
| 14 | ccgtcc | gacgac |
| 15 | gtagag | taatcg |
| 16 | gtccgc | tacagc |
| 17 | gtgaaa | tataat |
| 18 | gtggcc | tcattc |
| 19 | gagtgg | tcggca |
| 20 | ggtagc | atcacg |
