# Supplementary material for: Immunoglobulin kappa light chain produced by cardiomyocytes and participates in maintaining intercalated disc integrity
Source: Research Square preprint supplement (doi:10.21203/rs.3.rs-114990/v1), 2020-12-02
Supplement: Supplementary file 2 [file 5025cb8377170ab4803ff200.xlsx]

## Sheet: Sheet1
		cell		clone No	V	J	Identity%	V-J junction	productive	sequence
	Isolated cardiomycyte of adult mice	WT-1		1	IGKV12-46*01	IGKJ1*01	97.9	\	Yes	GACATTCAGCTCACCCAGTCTCCAGCCTCCCTATCTGTATCTGTGGGAGAGACTGTCACCATCACATGTCGAGCAAGTGAGAGTATTTACAGTAATTTAGCATGGTATCAGCAGAAACAGGGAAAATCTCCTCAGCTCCTGGTCTATGCTGCAACAAACTTAGCAGATGGTGTGCCATCAAGGTTCAGTGGCAGTGGATCAGGCACACAGTATTCCCTCAAGATCAACAGCCTGCAGTCTGAAGATTTTGGGAGTTATTACTGTCAACATTTTTGGGGTACTCCGTGGACGTTCGGTGGTGGAACCAA
				2	IGKV4-91*01	IGKJ5*01	98.6	\	Yes	GACATTCAGCTGACCCAGTCTCCAACCACCATGGCTGCATCTCCCGGGGAGAAGATCACTATCACCTGCAGTGCCAGCTCAAGTATAAGTTCCAATTACTTGCATTGGTATCAGCAGAAGCCAGGATTCTCCCCTAAACTCTTGATTTATAGGACATCCAATCTGGCTTCTGGAGTCCCAGCTCGCTTCAGTGGCAGTGGGTCTGGGACCTCTTACTCTCTCACAATTGGCACCATGGAGGCTGAAGATGTTGCCACTTACTACTGCCAGCAGGGTAGTAGTATACCACGGCTCACGTTCGGCGGTGGAACCAA
				3	IGKV12-44*01	IGKJ1*01	98.9	\	Yes	ATTCAGCTGACCCAGTCTCCAGCCTCCCTATCTGCATCTGTGGGAGAAACTGTCACCATCACATGTCGAGCAAGTGAGAATATTTACAGTTATTTAGCATGGTATCAGCAGAAACAGGGAAAATCTCCTCAGCTCCTGGTCTATAATGCAAAAACCTTAGCAGAAGGTGTGCCATCAAGGTTCAGTGGCAGTGGATCAGGCACACAGTTTTCTCTGAAGATCAACAGCCTGCAGCCTGAAGATTTTGGGAGTTATTACTGTCAACATCATTATGGTACTCCTCGGACGTTCGGCGGTGGAACCAA
				4	IGKV12-44*01	IGKJ1*01	99	\	Yes	GACATTCAGCTGACCCAGTCTCCAGCCTCCCTATCTGCATCTGTGGGAGAAACTGTCACCATCACATGTCGAGCAAGTGAGAATATTTACAGTTATTTAGCATGGTATCAGCAGAAACAGGGAAAATCTCCTCAGCTCCTGGTCTATAATGCAAAAACCTTAGCAGAAGGTGTGCCATCAAGGTTCAGTGGCAGTGGATCAGGCACACAGTTTTCTCTGAAGATCAACAGCCTGCAGCCTGAAGATTTTGGGAGTTATTACTGTCAACATCATTATGGTACTCCTCGGACGTTCGGCGGTGGAACCAA
				5	IGKV19-93*01	IGKJ1*01	98.9	\	Yes	GACATTCAGCTGACCCAGTCTCCATCCTCACTGTCTGCATCTCTGGGAGGCAAAGTCACCATCACTTGCAAGGCAAGCCAAGACATTAACAAGTATATAGCTTGGTACCAACACAAGCCTGGAAAAGGTCCTAGGCTGCTCATACATTACACATCTACATTACAGCCAGGCATCCCATCAAGGTTCAGTGGAAGTGGGTCTGGGAGAGATTATTCCTTCAGCATCAGCAACCTGGAGCCTGAAGATATTGCAACTTATTATTGTCTACAGTATGATAATCTTCTGTGGACGTTCGGCGGTGGAACCAAGCT
				6	IGKV17-127*01	IGKJ5*01	100	\	Yes	GACATTCAGCTGACCCAGTCTCCAGCATCCCTGTCCGTGGCTACAGGAGAAAAAGTCACTATCAGATGCATAACCAGCACTGATATTGATGATGATATGAACTGGTACCAGCAGAAGCCAGGGGAACCTCCTAAGCTCCTTATTTCAGAAGGCAATACTCTTCGTCCTGGAGTCCCATCCCGATTCTCCAGCAGTGGCTATGGCACAGATTTTGTTTTTACAATTGAAAACACGCTCTCAGAAGATGTTGCAGATTACTACTGTTTGCAAAGTGATAACATGCCTCTCACGTTCGGTGGTGGAACCAA
				7	IGKV9-120*01	IGKJ5*01	98.9	AT	Yes	GACATTCAGCTGACCCAGTCTCCATCCTCCTTATCTGCCTCTCTGGGAGAAAGAGTCAGTCTCACTTGTCGGGCAAGTCAGGACATTGGTAGTAGCTTAAACTGGCTTCAGCAGGAACCAGATGGAACTATTAAACGCCTGATCTACGCCACATCCAGTTTAGATTCTGGTGTCCCCAAAAGGTTCAGTGGCAGTAGGTCTGGGTCAGATTATTCTCTCACCATCAGCAGCCTTGAGTCTGAAGATTTTGTAGACTATTACTGTCTACAATATGCTAGTTCTCCATTCACGTTCGGCGGTGGAACCAAGCT
				8	IGKV12-41*01	IGKJ1*01	98.6	CAC	Yes	GACATTCAGCTGACCCAGTCTCCAGCCTCCCTATCTGCATCTGTGGGAGAAACTGTCACCATCACATGTCGAGCAAGTGGGAATATTCACAATTATTTAGCATGGTATCAGCAGAAACAGGGAAAATCTCCTCAGCTCCTGGTCTATAATGCAAAAACCTTAGCAGATGGTGTGCCATCAAGGTTCAGTGGCAGTGGATCAGGAACACAATATTCTCTCAAGATCAACAGCCTGCAGCCTGAAGGTTTTGGGAGTTATTACTGTCAACATTTTTGGAGTACTCCCACGTGGACGTTCGGTGGTGGAACCAA
		WT-2		1	IGKV14-111*01	IGKJ5*01	97.5	TA	No	GACATTCAGCTGACTCAGTCTCCATCTTCCATGTATGCATCTCTAGGAGAGAGTCACTATCACTTGCAAGGCGAGTCAGGACATAAATAGCTATTTAAGCTGGTTCCAGCAGAAACCAGGGAAATCTCCTAAGACCCTGATCTATCGTGCAAACAGATTGGTAGATGGGGTCCCATCAAGGTTCAGTGGCAGTGGATCTGGGCAAGATTATTCTCTCACCATCAGCAGCCTGGAGTATGAAGATATGGGAATTTATTATTGTCTACAGTATGATGAGTTTCCTTACACGTTCGGTGGTGGAACCAAGCT
				2	IGKV14-111*01	IGKJ2*01	99.6	\	Yes	AGCTGACCCAGTCTCCATCTTCCATGTATGCATCTCTAGGAGAGAGAGTCACTATCACTTGCAAGGCGAGTCAGGACATTAATAGCTATTTAAGCTGGTTCCAGCAGAAACCAGGGAAATCTCCTAAGACCCTGATCTATCGTGCAAACAGATTGGTAGATGGGGTCCCATCAAGGTTCAGTGGCAGTGGATCTGGGCAAGATTATTCTCTCACCATCAGCAGCCTGGAGTATGAAGATATGGGAATTTATTATTGTCTACAGTATGATGAGTTTCCGTACACGTTCGGCGGTGGAACCAA
				3	IGKV12-46*01	IGKJ1*01	97.5	\	Yes	TGACCCAGTCTCCAGCCTCCCTATCTGTATCTGTGGGAGAAACTGTCACCATCACATGTCGAGCAAGCGAGAATATTCACAGTAATTTAGCATGGTATCAGAAGAAACAGGGAAAATCTCCTCAGCTCCTGGTCTATACTGCAAAAAACTTAGCAGATGGTGTGCCATCAAGGTTCAGTGGCAGTGGATCAGGCACACAGTATTCCCTCAAGATCAACAGCCTGCAGTCTGAAGATTTTGGGAGTTATTACTGTCTACATTTTTGGGGTACTCCTCGGACGTTCGGCGGTGGAACCAAGCT
				4	IGKV3-5*01	IGKJ2*01	98.3	\	Yes	GACATTCAGCTGACCCAGTCTCCAGCTTCTTTGGCTGTGTCTCTAGGGCAGAGGGCCACCATATCCTGCAGAGCCAGTGAAAGTGTTGATAGTTATGGCAATAGTTTTATGCACTGGTACCAGCAGAAACCAGGACAGCCACCCAAACTCCTCATCTATCTCGCATCCAACCTAGAATCTGGGATCCCTGCCAGGTTCAGTGGCAGTGGGTCTAGGACAGACTTCACCCTCACCATTAATCCTGTGGAGGCTGATGATGTTGCAACCTATTACTGTCAGCAAAGTAATGAGGATCCGTACACGTTCGGTGGTGGAACCAAGCT
				5	IGKV12-46*01	IGKJ1*01	97.2	\	Yes	GACATTCAGCTGACCCAGTCTCCAGCCTCCCTATCTGTATCTGTGGGAGAAACTGTCACCATCACATGTCGAGCAAGTGAGAATATTCACAGTAATTTAGCATGGTATCAGAAGAAACAGGGAAAATCTCCTCAGCTCCTGGTCTATACTGCAAAAAACTTAGCAGATGGTGTGCCATCAAGGTTCAGTGGCAGTGGATCAGGCACACAGTATTCCCTCAAGATCAACAGCCTGCAGTCTGAAGATTTTGGGAGTTATTACTGTCTACATTTTTGGGGTACTCCTCGGACGTTCGGCGGTGGAACCAAGCT
				6	IGKV12-41*01	IGKJ1*01	98.3	\	Yes	GACATTCAGCTGACCCAGTCTCCAGCCTCCCTATCTGCATCCGTGGGAGAAACTGTCACCATCACATGTCGAGCAAGTGGGAATATTCACAATTATTTAGCATGGTATCAGCAGAAACAGGGAAAATCTCCTCAGCTCCTGGTCTATAATGCAAAAACCTTAGCAGATGGTGTGCCATCAAGGTTCAGTGGCAGTGTATCAGGAACACAATATTCTCTCAAGATCAACAGCCTGCAGCCTGAAGATTTTGGGAGTTATTACTGTCAACATTTTTGGAGTACTCCTCGGACGTTCGGTGGTGGAACCAA
		WT-3		1	IGKV4-74*01	IGKJ2*01	99.3	\	Yes	CTGACCCAGTCTCCAGCAATCATGTCTGCATCTCTAGGGGAACGGGTCACCATGACCTGCACTGCCAGCTCGAGTGTAAGTTCCAGTTACTTGCACTGGTACCAGCAGAAGCCAGGATCCTCCCCCAAACTCTGGATTTATAGCACATCCAACCTGGCTTCTGGAGTCCCAGCTCGCTTCAGTGGCAGTGGGTCTGGGACCTCTTACTCTCTCACAATCAGCAGCATGGAGGCTGAAGATGCTGCCACTTATTACTGCCACCAGTATCATCGTTCCCCGTACACGTTCGGTGGTGGAACCAA
				2	IGKV4-91*01	IGKJ5*01	98.9	\	Yes	GACATTCAGCTGACCCAGTCTCCATCTTATCTTGCTGCATCTCCTGGAGAAACCATTACTATTAATTGCAGGGCAAGTAAGAGCATTAGCAAATATTTAGCCTGGTATCAAGAGAAACCTGGGAAAACTAATAAGCTTCTTATCTACTCTGGATCCACTTTGCAATCTGGAATTCCATCAAGGTTCAGTGGCAGTGGATCTGGTACAGATTTCACTCTCACCATCAGTAGCCTGGAACCTGAAGATTTTGCAATGTATTACTGTCAACAGCATAATGAATACCCGTGGACGTTCGGCGGTGGAACCAA
				3	IGKV12-46*01	IGKJ1*01	97.2	\	Yes	GACATTCAGCTGACCCAGTCTCCAGCCTCCCTATCTGTATCTGTGGGAGAAACTGTCACCATCACATGTCGAGCAAGTGAGAATATTCACAGTAATTTAGCATGGTATCAGAAGAAACAGGGAAAATCTCCTCAGCTCCTGGTCTATACTGCAAAAAACTTAGCAGATGGTGTGCCATCAAGGTTCAGTGGCAGTGGATCAGGCACACAGTATTCCCTCAAGATCAACAGCCTGCAGTCTGAAGATTTTGGGAGTTATTACTGTCAACATTTTTGGAGTACTCCGTGGACGTTCGGCGGTGGAACCAA
				4	IGKV14-126*01	IGKJ1*01	98.9	\	Yes	GACATTCAGCTGACCCAGTCTCCATCCTCCATGTATGCATCGCTGGGAGAGAGAGTCACTATCACTTGCAAGGCGAGTCAGGACATTAAAAGCTATTTAAGCTGGTACCAGCAGAAACCATGGAAATCTCCTAAGACCCTGATCTATTATGCAACAAGCTTGGCAGATGGGGTCCCATCAAGATTCAGTGGCAGTGGATCTGGGCAAGATTATTCTCTAACCATCAGCAGCCTGGAGTCTGACGATACAGCAACTTATTACTGTCTACAGCATGGTGAGAGCCCGTGGACGTTCGGTGGTGGAACCAA
				5	IGKV14-111*01	IGKJ2*01	98.9	\	Yes	GACATTCAGCTGACCCAGTCTCCATCTTCCATGTATGCATCTCTAGGAGAGAGAGTCACTATCACTTGCAAGGCGAGTCAGGACATTAATAGCTATTTAAGCTGGTTCCAGCAGAAACCAGGGAAATCTCCTAAGACCCTGATCTATCGTGCAAACAGATTGGTAGATGGGGTCCCATCAAGGTTCAGTGGCAGTGGATCTGGGCAAGATTATTCTCTCACCATCAGCAGCCTGGAGTATGAAGATATGGGAATTTATTATTGTCTACAGTATGATGAGTTTCCGTACACGTTCGGCGGTGGAACCAA
				6	IGKV12-44*01	IGKJ1*01	98.6	\	Yes	GACATTCAGCTGACCCAGTCTCCAGCCTCCCTATCTGCATCTGTGGGAGAAACTGTCACCATCACATGTCGAGCAAGTGAGAATATTTACAGTTATTTAGCATGGTATCAGCAGAAACAGGGAAAATCTCCTCAGCTCCTGGTCTATAATGCAAAAACCTTAGCAGAAGGTGTGCCATCAAGGTTCAGTGGCAGTGGATCAGGCACACAGTTTCCTCTGAAGATCAACAGCCTGCAGCCTGAAGATTTTGGGAGTTATTACTGTCAACATCATTATGGTACTCCTCGGACGTTCGGTGGTGGAACCAA
				7	IGKV4-91*01	IGKJ1*01	98.3	\	Yes	GACATTCAGCTGACCCAGTCTCCAACCACCATGGCTGCATCTCCCGGGGAGAAGATCACTATCACCTGCAGTGCCAGCTCAAGTATAAGTTCCAATTACTTGCATTGGTATCAGCAGAAGCCAGGATTCTCCCCTAAACTCTTGATTTATAGGACATCCAATCTGGCTTCTGGAGTCCCAGCTCGCTTCAGTGGCAGTGGGTCTGGGACCTCTTACTCTCTCACAATTGGCACCATGGAGGCTGAAGATGTTGCCACTTACTACTGCCAGCAGGGTAGTAGTATACCACTCACGTTCGGCGGTGGAACCAA
		WT-4		1	IGKV14-100*01	IGKJ1*01	98.6	\	Yes	GACATTCAGCTGACCCAGTCTCCATCCTCCATGTCTGTATCTCTGGGAGACACAGTCAGCATCACTTGCCATGCAAGTCAGGGCATTAGCAGTAATATAGGGTGGTTGCAGCAGAAACCAGGGAAATCATTTAAGGGCCTGATCTATCATGGAACCAACTTGGAAGATGGAGTTCCATCAAGGTTCAGTGGCAGTGGATCTGGAGCAGATTATTCTCTCACCATCAGCAGCCTGGAATCTGAAGATTTTGCAGACTATTACTGTGTACAGTATGCTCAGTTTCCGTGGACGTTCGGCGGTGGAACCAA
				2	IGKV3-5*01	IGKJ5*01	98.3	\	Yes	GACATTCAGCTGACCCAGTCTCCAGCCTCTTTGGCTGTGTCTCTAGGGCAGAGGGCCACCATATCCTGCAGAGCCAGTGAAAGTGTTGATAGTTATGGCAATAGTTTTATGCACTGGTACCAGCAGAAACCAGGACAGCCACCCAAACTCCTCATCTATCGTGCATCCAACCTAGAATCTGGGATCCCTGCCAGGTTCAGTGGCAGTGGGTCTAGGACAGACTTCACCCTCGCCATTAATCCTGTGGAGGCTGATGATGTTGCAACCTATTACTGTCAGCAAAGTAATGAGGATCCGCTCACGTTCGGCGGTGGAACCAA
				3	IGKV17-121*01	IGKJ2*01	100	\	Yes	TGACCCAGTCTCCAGCATCCCTGTCCATGGCTATAGGAGAAAAAGTCACCATCAGATGCATAACCAGCACTGATATTGATGATGATATGAACTGGTACCAGCAGAAGCCAGGGGAACCTCCTAAGCTCCTTATTTCAGAAGGCAATACTCTTCGTCCTGGAGTCCCATCCCGATTCTCCAGCAGTGGCTATGGTACAGATTTTGTTTTTACAATTGAAAACATGCTCTCAGAAGATGTTGCAGATTACTACTGTTTGCAAAGTGATAACTTGCCGTACACGTTCGGTGGTGGAACCAA
				4	IGKV9-120*01	IGKJ2*01	98.9	\	Yes	GACATTCAGCTGACCCAGTCTCCATCCTCCTTATCTGCCTCTCTGGGAGAAAGAGTCAGTCTCACTTGTCGGGCAAGTCAGGACATTGGTAGTAGCTTAAACTGGCTTCAGCAGGAACCAGATGGAACTATTAAACGCCTGATCTACGCCACATCCAGTTTAGATTCTGGTGTCCCCAAAAGGTTCAGTGGCAGTAGGTCTGGGTCAGATTATTCTCTCACCATCAGCAGCCTTGAGTCTGAAGATTTTGTAGACTATTACTGTCTACAATATGCTAGTTCTCCGTACACGTTCGGCGGTGGAACCAA
				5	IGKV3-10*01	IGKJ5*01	99	\	Yes	ACATTCAGCTGACCCAGTCTCCAGCTTCTTTGGCTGTGTCTCTAGGGCAGAGGGCCACCATATCCTGCAGAGCCAGTGAAAGTGTTGATAGTTATGGCAATAGTTTTATGCACTGGTACCAGCAGAAACCAGGACAGCCACCCAAACTCCTCATCTATCTTGCATCCAACCTAGAATCTGGGGTCCCTGCCAGGTTCAGTGGCAGTGGGTCTAGGACAGACTTCACCCTCACCATTGATCCTGTGGAGGCTGATGATGCTGCAACCTATTACTGTCAGCAAAATAATGAGGATCCTCTCACGTTCGGTGGTGGAACCAAGCT
				6	IGKV9-120*01	IGKJ1*01	97.9	\	Yes	GACATTCAGCTGACCCAGTCTCCATCCTCCTTATCTGCCTCTCTGGGAGAAAGAGTCAGTCTCACTTGTCGGGCAAGTCAGGACATTGGTAATAGCTTAAACTGGCTTCAGCAGGAACCAGATGGAACTATTAAACGCCTGATCTACGCCACATCCAGTTTAGATTCTGGTGTCCCCAAAAGGTTCAGTGGCAGTAGGTCTGGGTCAGATTATTCTCTCACCATCAGCAGCCTTGAGTCTGAAGATTTTGTAGACTATTACTGTCTACAATATTCAAGTTCTCCGTGGACGTTCGGTGGTGGAACCAA
		WT-5		1	IGKV4-63*01	IGKJ5*01	96.5	\	Yes	GATATTGTGATGACACAGACTACAGCAATCATGTCTGCATCTCCAGGGGAGAAGGTCACCATGACCTGCAGTGCCAGCTCAAGTGTAAGTTACATGCACTGGTACCAGCAGAAGTCAAGCACCTCCCCCAAACTCTGGATTTATGACACATCCAAACTGGCTTCTGGAGTCCCAGGTCGCTTCAGTGGCAGTGGGTCTGGAAACTCTTACTCTCTCACGATCAGCAGCATGGAGGCTGAAGATGTTGCCACTTATTACTGTTTTCAGGGGAGTGGGTACCCGCTCACGTTCGGTGCTGGGACCAAGCTGGAGCTGAAAC
				2	IGKV4-61*01	IGKJ2*01	98.2	\	Yes	ATTGTGATGACCCAATCTACAGCAATCATGTCTGCATCTCCAGGGGAGAAGGTCACCATATCCTGCAGTGCCAGCTCAAGTGTAAGTTACATGTACTGGTACCAGCAGAAGCCAGGATCCTCCCCCAAACCCTGGATTTATCGCACATCCAACCTGGCTTCTGGAGTCCCTGCTCGCTTCAGTGGCAGTGGGTCTGGGACCTCTTACTCTCTCACAATCAGCAGCATGGAGGCTGAAGATGCTGCCACTTATTACTGCCAGCAGTATCATAGTTACCCGTACACGCTCGGAGGGGGGACCAAGCTGGAAATAAAAC
				3	IGKV14-111*01	IGKJ5*01	98.9	\	Yes	TGACACAATCTACATCTTCCATGTATGCATCTCTAGGAGAGAGAGTCACTATCACTTGCAAGGCGAGTCAGGACATTAATAGCTATTTAAGCTGGTTCCAGCAGAAACCAGGGAAATCTCCTAAGACCCTGATCTATCGTGCAAACAGATTGGTAGATGGGGTCCCATCAAGGTTCAGTGGCAGTGGATCTGGGCAAGATTATTCTCTCACCATCAGCAGCCTGGAGTATGAAGATATGGGAATTTATTATTGTCTACAGTATGATGAGTTTCCTCTCACGTTCGGTGCTGGGACCAAGCTGGAGCTGAAAC
				4	IGKV3-2*01	IGKJ1*01	98.6	\	Yes	GATATTGTGCTGACCCAGACTACAGCTTCTTTGGCTGTGTCTCTAGGGCAGAGGGCCACCATCTCCTGCAGAGCCAGCGAAAGTGTTGATAATTATGGCATTAGTTTTATGAACTGGTTCCAACAGAAACCAGGACAGCCACCCAAACTCCTCATCTATGCTGCATCCAACCAAGGATCCGGGGTCCCTGCCAGGTTTAGTGGCAGTGGGTCTGGGACAGACTTCAGCCTCAACATCCATCCTATGGAGGAGGATGATACTGCAATGTATTTCTGTCAGCAAAGTAAGGAGGTTCCGTGGACGTTCGGTGGAGGCACCAAGCTGGAAATCAAAC
				5	IGKV4-91*01	IGKJ4*01	99	\	Yes	GATATTGTGCTGACACAGTCTCCAACCACCATGGCTGCATCTCCCGGGGAGAAGATCACTATCACCTGCAGTGCCAGCTCAAGTATAAGTTCCAATTACTTGCATTGGTATCAGCAGAAGCCAGGATTCTCCCCTAAACTCTTGATTTATAGGACATCCAATCTGGCTTCTGGAGTCCCAGCTCGCTTCAGTGGCAGTGGGTCTGGGACCTCTTACTCTCTCACAATTGGCACCATGGAGGCTGAAGATGTTGCCACTTACTACTGCCAGCAGGGTAGTAGTATACCATTCACGTTCGGCTCGGGGACAAAGTTGGAAATAAAAC
				6	IGKV3-2*01	IGKJ1*01	93.9	\	Yes	GATATTGTGATGACACAGTCTACAGCTTCTTTGGCTGTGTCTCTAGGGCAGAGGGCCACCATCTCCTGTAGAGCCAGCGAAAGTGTTGATAATTATGGCATTAGTTTTATGGACTGGTTCCAACAGAAACCAGGACAGCCACCCAAACTCCTCATCTATGAAGCATCCAACGTAGAATCTGGGGTCCCTGCCAGGTTTAGTGGCAGTGGGTCTGGGACAGACTTCAGCCTCAGCATCCATCCTGTGGAGGAGGATGATATTGCAATGTATTTCTGTCAGCAAAGTAGGAAGGTTCGGACGTTCGGTGGAGGCACCAAGCTGGAAATCAAAC
				7	IGKV3-10*01	IGKJ4*01	99.3	\	Yes	GATATTGTGATGACCCAATCTCCAGCTTCTTTGGCTGTGTCTCTAGGGCAGAGGGCCACCATATCCAGCAGAGCCAGTGAAAGTGTTGATAGTTATGGCAATAGTTTTATGCACTGGTACCAGCAGAAACCAGGACAGCCACCCAAACTCCTCATCTATCTTGCATCCAACCTAGAATCTGGGGTCCCTGCCAGGTTCAGTGGCAGTGGGTCTAGGACAGACTTCACCCTCACCATTGATCCTGTGGAGGCTGATGATGCTGCAACCTATTACTGTCAGCAAAATAATGAGGATCCATTCACGTTCGGCTCGGGGACAAAGTTGGAAATAAAAC
				8	IGKV14-100*01	IGKJ4*01	97.9	\	Yes	GATATTGTGCTGACACAATCTACATCCTCCATGTCTGTATCTCTGGGAGACACAGTCAGCATCACTTGCCATGCAAGTCAGGGCATTAGCAGTAATATAGGGTGGTTGCAGCAGAAACCAGGGAAATCATTTAAGGGCCTGATCTATCATGGAACCAACTTGGAAGATGGAGTTCCATCAAGGTTCAGTGGCAGTGGATCTGGAGCAGATTATTCTCTCACCATCAGCAGCCTGGAATCTGAAGATTTTGCAGACTATTACTGTGTACAGTATGCTCAGTTTCCATTCACGTTCGGCTCGGGGACAAAGTTGGAAATAAAAC
				9	IGKV14-111*01	IGKJ5*01	98.9	\	Yes	TGACCCAAACTCCATCTTCCATGTATGCATCTCTAGGAGAGAGAGTCACTATCACTTGCAAGGCGAGTCAGGACATTAATAGCTATTTAAGCTGGTTCCAGCAGAAACCAGGGAAATCTCCTAAGACCCTGATCTATCGTGCAAACAGATTGGTAGATGGGGTCCCATCAAGGTTCAGTGGCAGTGGATCTGGGCAAGATTATTCTCTCACCATCAGCAGCCTGGAGTATGAAGGTATGGGAATTTATTATTGTCTACAGTATGATGAGTTTCCGCTCACGTTCGGTGCTGGGACCAAGCTGGAGCTGAAAC
		WT-6		1	IGKV3-2*01	IGKJ1*01	97	\	Yes	GATATTGTGATGACCCAGACTCCAGCTTCTTTGGCTGTGTCTCTAGGGCAGAGGGCCACCATCTCCTGCAGAGCCAGCGAAAGTGTTGATAGTTATGGCATTAGTTTTATAAACTGGTTCCGACAGAAACCAGGACAGCCACCCAAACTCCTCATCTATGCTGCATCCAACCAGGGATCCGGGGTCCCTGCCAGGTTTAGTGGCAGTGGGTCTGGGACAGACTTCAGCCTCAACATCCATCCTATGGAGGAGGATGATACTGCAATGTATTTCTGTCAGCAAACTAAGGAGGTTCCGTGGACGTTCGGTGGAGGCTCCCAGCTGGAAATCAAAC
				2	IGKV17-121*01	IGKJ4*01	99.3	\	Yes	ACCCAGTCTCCAGCATCCCTGTCCATGGCTATAGGAGAAAAAGTCACCATCAGATGCATAACCAGCACTGATATTGATGATGATATGAACTGGTACCAGCAGAAGCCAGGGGAACCTCCTAATCTCCTTATTTCAGAAGGCAATACTCTTCGTCCTGGAGTCCCATCCCGATTCTCCAGCAGTGGCTATGGTACAGATTTTGTTTTTACAATTGAAAACATGCTCTCAGAGGATGTTGCAGATTACTACTGTTTGCAAAGTGATAACTTGCCTCTCACGTTCGGCTCGGGGACAAAGTTGGAAATAAAAC
				3	IGKV14-111*01	IGKJ4*01	98.9	\	Yes	TGACCCAATCTCCATCTTCCCTGTATGCATCTCTAGGAGAGAGAGTCACTATCACTTGCAAGGCGAGTCAGGACATTAATAGCTATTTAAGCTGGTTCCAGCAGAAACCAGGGAAATCTCCTAAGACCCTGGTCTATCGTGCAAACAGATTGGTAGATGGGGTCCCATCAAGGTTCAGTGGCAGTGGATCTGGGCAAGATTATTCTCTCACCATCAGCAGCCTGGAGTATGAAGATATGGGAATTTATTATTGTCTACAGTATGATGAGTTTCCTCACGTTCGGCTCGGGGACAAAGTTGGAAATAAAAC
				4	IGKV17-121*01	IGKJ4*01	98.6	\	Yes	TGACACAGTCTACAGCATCCCTGTCCATGGCTATAGGAGAAAAAGTCACCATCAGATGCATAACCAGCACTGATATTGATGATGATATGAACTGGTACCAGCAGAAGCCAGGGGAACCTCCTAATCTCCTTATTTCAGAAGGCAATACTCTTCGTCCTGGAGTCCCATCCCGATTCTCCAGCAGTGGCTATGGTACAGATTTTGTTTTTACAATTGAAAACATGCTCTCAGAGGATGTTGCAGATTACTACTGTTTGCAAAGTGATAACTTGCCTCTCACGTTCGGCTCGGGGACAAAGTTGGAAATAAAAC
		WT-7		1	IGKV3-5*01	IGKJ5*01	98.3	\	Yes	GATATTGTGATGACCCAGTCTACAGCTTCTTTGGCTGTGTCTCTAGGGCAGAGGGCCACCATATCCTGCAGAGCCAGTGAAAGTGTTGATAGTTATGGCAATAGTTTTATGCACTGGTACAAGCAGAAACCAGGACAGCCACCCAAACTCCTCATCTATCGTGCATCCAACCTAGAATCTGGGATCCCTGCCAGGTTCAGTGGCAGTGGGTCTAGGACAGACTTCACCCTCACCATTAATCCTGTGGAGGCTGATGATGTTGCAACCTATTACTGTCAGCAAAGTAATGAGGATCCGCTCACGTTCGGTGCTGGGACCAAGCTGGAGCTGAAAC
		uMT-1		1	IGKV12-46*01	IGKJ2*01	97.9	A	Yes	GACATTCAGCTGACCCAGTCTCCAGCCTCCCTATCTGTATCTGAGGGAGAAACTGTCACCATCACATGTCGAGCAAGTGAGAAAATTTACAGTAATTTAGCATGGTATCAGCAGAAACAGGGAAAATCTCCTCAGCTCCTGGTCTATGCTGCAACAAACTTAGCAGATGGTGTGCCATCAAGGTTCAGTGGCAGTGGATCAGGCACACAGTATTCCCTCAAGATCAACAGCCTGCAGTCTGAAGATTTTGGGAGTTATTACTGTCAACATTTTTGGGATACTCCATACACGTTCGGCGGTGGAACCAAGCT
				2	IGKV12-46*01	IGKJ2*01	97.5	A	Yes	GACATTCAGCTGACCCAGTCTCCCGCCTCCCTATCTGTATCTGAGGGAGAAACTGTCACCATCACATGTCGAGCAAGTGAGAAAATTTACAGTAATTTAGCATGGTATCAGCAGAAACAGGGAAAATCTCCTCAGCTCCTGGTCTATGCTGCAACAAACTTAGCAGATGGTGTGCCATCAAGGTTCAGTGGCAGTGGATCAGGCACACAGTATTCCCTCAAGATCAACAGCCTGCAGTCTGAAGATTTTGGGAGTTATTACTGTCAACATTTTTGGGATACTCCATACACGTTCGGCGGTGGAACCAAGCT
				3	IGKV12-46*01	IGKJ5*01	97.9	ATA	Yes	GACATTCAGCTGACCCAGTCTCCAGCCTCCCTATCTGTATCTGAGGGAGAAACTGTCACCATCACATGTCGAGCAAGTGAGAAAATTTACAGTAATTTAGCATGGTATCAGCAGAAACAGGGAAAATCTCCTCAGCTCCTGGTCTATGCTGCAACAAACTTAGCAGATGGTGTGCCATCAAGGTTCAGTGGCAGTGGATCAGGCACACAGTATTCCCTCAAGATCAACAGCCTGCAGTCTGAAGATTTTGGGAGTTATTACTGTCAACATTTTTGGGATACTCCATACACGTTCGGTGGTGGAACCAAGCT
				4	IGKV12-46*01	IGKJ5*01	94.4	\	Yes	GACATTCAGCTGACCCAGTCTCCAGCCTCCCTATCTGTATCTGTGGGAGAAACTGTCACCATCACATGTCGAGCAAGTGAGAATATTTTCAATAATTTAATATGGTATCAGCAGAAACAGGGAAAATCTCCTCAGGTCCTGGTCTATGGTGCAAAAAAATTAGCAGATGGTGTGCCATCAAGGTTCAGTGGCAGTGGATCAGGCACACAGTATGCCCTCAAGATCAATAGCCTGCAGTCTGAAGATTTTGGGACTTATTACTGTCAACATTTTTGGGGTATGCCTCTCACGTTCGGCGGTGGAACCAA
				5	IGKV3-10*01	IGKJ2*01	97.3	\	Yes	GACATTCAGCTGACCCAGTCTCCAGTTTCTTTGGCTGTGTCTCTAGGGCAGAGGGCCACCATATCCTGCAGAGCCAGTGAAAGTGTTGATAGTTATGGCAGTAGTTTTATGCACTGGTACCAGCAGAAACCAGGACAGCCACCCAAACTCCTCATCTATCTTGCATCCAACCTAGAATCTGGGGTCCCTGCCAGGTTCAGTGGCAGTGGGTCTAGGACGGACTTCACCCTCACCATTGATCCTGTGGAGGCTGATGATGCTGCAACCTATTACTGTCACCAAAATAATGAAGATCCGTACACGTTCGGTGGTGGAACCAA
				6	IGKV12-46*01	IGKJ5*01	92.7	\	Yes	GACATTCAGCTGACCCAGTCTCCAGCCTCCCTATCTGTATCTGTGGGAGAAACTGTCACCATCACATGTCGAGCAAGTGAGATTATTCACCATAATTTAGCATGGTATCAACATAAACAGGGAAAATCTCTTCAACTCCTGGTCTATGGTGCAATAAATTTAGTAGATGGTGTGCCATCAAGGTTCAGTGCCACTGGATCAGGCACACAGTTTTCCCTCAAGATCAACAGCCTGCAGTCTGAAGATTTTGGGACTTATTACTGTCAACATTTTTGGGGTATGCCTCTCACGTTCGGCGGTGGAACCAA
				7	IGKV12-46*01	IGKJ5*01	94.1	\	Yes	GACATTCAGCTGACCCAGTCTCCAGCCTCCCTATCTGTATCTGTGGGAGAAACTGTCACCATCACATGTCGAGCAAGTGAGAATATTTTCAATAGTTTAATATGGTATCAGCAGAAACAGGGAAAATCTCCTCAGGTCCTGGTCTATGGTGCAAAAAAATTAGCAGATGGTGTGCCATCAAGGTTCAGTGGCAGTGGATCAGGCACACAGTATGCCCTCAAGATCAATAGCCTGCAGTCTGAAGATTTTGGGACTTATTACTGTCAACATTTTTGGGGTATGCCTCTCACGTTCGGCGGTGGAACCAA
				8	IGKV14-111*01	IGKJ5*01	91.9	\	Yes	GACATTCAGCTGACCCAGTCTCCATCTTCCATGTATGTCTCTCTAAAAGAGAGAGTCACTTTCACTTGCAAGGCGAGTCAGGACATTAATAATTATTTAAGCTGGCTCCAACAGAAACCAGGGAAATCTCCTAAGACCCTGATTTATGGTGCAAATAGATTGGAAGATGGGGTCCCATCAAGGTTCAGTGGCAGTGGCTCTGGGCAAGATTATTCTCTCACCATCAAAAGCCTGGAATATGAAGATGTGGGAATTTATTATTGTCTACAGTATGATGAGACTCCGCTCACGTTCGGCGGTGGAACCAA
				9	IGKV17-127*01	IGKJ2*01	92	\	Yes	TGACCCAGTCTCCATCATCCCTGTCCGTGGACATAGGAGAAAAAGTCACTATCAGATGCACAACCAACACTGATGTTGATGATAATATGAACTGGTACCAGCTGAAGCCAGGAAAACCTCCTAAACTCCTTATTTCAGAGGGCACTGTTCTTCGTCCTGGAGTCCCGTCCCGATTCTCCAGCAGTGGCTATGGCACAGATTTTGTTTTTACAGTTCGAAACACGCTCTCAGAAGATGTTGCATATTACTACTGTTTGCAAAGTGAGAACATGCCGTACACGTTCGGTGGTGGAACCAAGCT
				10	IGKV4-53*01	IGKJ1*01	97.9	ATT	Yes	GACATTCAGCTGACCCAGTCTCCAGCACTCATGGCTGCATCTCCAGGGGAGAAGGTCACCATCATCTGCAGTGTCAGCTCAAGTATAAGTTCCAGCAACTTGCACTGGTACCAACAGAAGTCAGAAACCTCCCCCAAACCCTGGATTTATGGCACATCCAACCTGGCTTCTGGAGTCCCTGTTCGCTTCAGTGGCAGTGGATCTGGGACCTCTTATTCTCTCACAATCAGCAGCATGGAGGCTGAAGATGCTGCCACTTATTACTGTCAACAGTGGAGTAGTTACCCAATTACGTTCGGCGGTGGAACCAA
				11	IGKV3-2*01	IGKJ1*01	96.3	A	Yes	GACATTCAGCTGACCCAGTCTCCAGCTTCTTTGGCTGTGTCTCTAGGGCAGAGGGCCACCATCTCCTGCAGAGCCAGCGAAAGTGTTGATAATTATGGCTTTAGTTTTATGAACTGGTTCCAGCAGAAACCAGGACAGCCACCCAAACTCCTCATCTATACTTCATCCTACCAAGGATCCGGGGTCCCTGCCAGATTTAGTGGCAGTGGGTCTGGGACAGACTTCAGCCTCAACATCCATCCTGTGGAGGAGGATGATACTGCAATGTATTTCTGTCAGCAGAGTAAGGAGGTTCCTCCAACGTTCGGCGGTGGAACCAA
		uMT-2		1	IGKV4-59*01	IGKJ1*01	92.8	\	Yes	CTGACCCAGTCTCCACCAACCCTGTCTGCATCTCCAGGGGAAAAGGTCACCTTGACCTGCAGTGCCAGCTCAAGTGTGAATTTCGTGCAGTGGTTCCAGCAGAGGTCCGGCACCTCCCCCAAAAGATGGATTTATGACACATCCAAACTGCCTTCTGGAGTCCCTACTCGCTTCAGTGGCAGTGGGTCTGGGACCTCTTTCTCTCTCACAATCAGCAGCGTGGAGGCTGAAGATGCTGCCACTTATTACTGCCAGCAGTGGAGTAGTAACCCGCTCACGTTCGGCGGTGGAACCAA
				2	IGKV4-59*01	IGKJ1*01	92.8	\	Yes	CTGACCCAGTCTCCACCAACCCTGTCTGCATCTCCAGGGGAAAAGGTCACCTTGACCTGCAGTGCCAGCTCAAGTGTGAATTTCGTGCAGTGGTTCCAGCAGAGGTCCGGCACCTCCCCCAAAAGATGGATTTATGACACATCCAAACTGCCTTCTGGAGTCCCTACTCGCTTCAGTGGCAGTGGGTCTGGGACCTCTTTCTCTCTCACAATCAGCAGCGTGGAGGCTGAAGATGCTGCCACTTATTACTGCCAGCAGTGGAGTAGTAACCCGCTCACGTTCGGTGGTGGAACCAAGCT
				3	IGKV4-59*01	IGKJ1*01	92.8	\	Yes	CTGACCCAGTCTCCACCAACCCTGTCTGCATCTCCAGGGGAAAAGGTCACCTTGACCTGCAGTGCCAGCTCAAGTGTGAATTTCGTGCAGTGGTTCCAGCAGAGGTCCGGCACCTCCCCCAAAAGATGGATTTATGACACATCCAAACTGCCTTCTGGAGTCCCTACTCGCTTCAGTGGCAGTGGGTCTGGGACCTCTTTCTCTCTCACAATCAGCAGCGTGGAGGCTGAAGATGCTGCCACTTATTACTGCCAGCAGTGGAGTAGTAACCCGCTCACGTTCGGCGGTGGAACCAA
		uMT-3		1	IGKV4-59*01	IGKJ1*01	94.3	\	Yes	ATTGTGATGACACAGACTCCAGCAATCATGTCTGCATCTCCAGGGGGGAAGGTCACCATGACCTGTAGTGCCAGCTCAAGTGTAAGTTACATACACTGGTACCAGCAGAAGTCGGACACCTCTCCCAAAAGATGGATTTATGACACATCCAAACTGGCTTCTGGAGTCCCTGCTCGCTTCAGTGACAGTGGGTCTGGGACCTCTTACTCTCTCACAATCAGAAGCATGGAGGCTGAAGATGCTGCCACTTATTACTGCCAGCAGTGGAGTAGTAAGCCGCTCACGTTCGGCGGTGGAACCAA
				2	IGKV4-59*01	IGKJ1*01	94.7	\	Yes	ATTGTGATGACCCAAACTACAGCAATCATGTCTGCATCTCCAGGGGAGAAGGTCACCATGACCTGTAGTGCCAGCTCAAGTGTAAGTTACATACACTGGTACCAGCAGAAGTCGGACACCTCTCCCAAAAGATGGATTTATGACACATCCAAACTGGCTTCTGGAGTCCCTGCTCGCTTCAGTGGCAGTGGGTCTGGGACCTCTTACTCTCTCACAATCAGAAGCATGGAGGCTGAAGATGCTGCCACTTATTACTGCCAGCAGTGGAGTAGTAAGCCGCTCACGTTCGGCGGTGGAACCAA
				3	IGKV4-59*01	IGKJ1*01	94.3	\	Yes	ATTGTGATGACACAGACTACAGCAACCATGTCTGCATCTCCAGGGGAGAAGGTCACCATGACCTGTAGTGCCAGCTCAAGTGTAAGTTACATACACTGGTACCAGCAGAAGTCGGACACCTCTCCCAAAAGATGGATTTATGACACATCCAAACTGGCTTCTGGAGTCCCTGCTCGCTTCAGTGGCAGTGGGTCTGGGACCTCTTACTCTCTCACAATCAGAAGCATGGAGGCTGAAGATGCTGCCACTTATTACTGCCAGCAGTGGAGTAGTAAGCCGCTCACGTTCGGTGGTGGAACCAA
				4	IGKV4-59*01	IGKJ1*01	94.7	\	Yes	ATTGTGATGACCCAAACTACAGCAATCATGTCTGCATCTCCAGGGGAGAAGGTCACCATGACCTGTAGTGCCAGCTCAAGTGTAAGTTACATACACTGGTACCAGCAGAAGTCGGACACCTCTCCCAAAAGATGGATTTATGACACATCCAAACTGGCTTCTGGAGTCCCTGCTCGCTTCAGTGGCAGTGGGTCTGGGACCTCTTACTCTCTCACAATCAGAAGCATGGAGGCTGAAGATGCTGCCACTTATTACTGCCAGCAGTGGAGTAGTAAGCCGCTCACGTTCGGCGGTGGAACCAA
				5	IGKV4-59*01	IGKJ1*01	95.8	\	Yes	ATTGTGCTGACCCAGACTCCAGCAATCATGTCTGCATCTCCAGGGGAGAAGGTCACCATGACCTGTAGTGCCAGCTCAAGTGTAAGTTACATACACTGGTACCAGCAGAAGTCGGACACCTCTCCCAAAAGATGGATTTATGACACATCCAAACTGGCTTCTGGAGTCCCTGCTCGCTTCAGTGGCAGTGGGTCTGGGACCTCTTACTCTCTCACAATCAGAAGCATGGAGGCTGAAGATGCTGCCACTTATTACTGCCAGCAGTGGAGTAGTAAGCCGCTCACGTTCGGTGGTGG
		uMT-4		1	IGKV17-121*01	IGKJ2*01	94.2	\	Yes	TGACCCAAACTCCACCATCCCTGTCCATGGCTATAGGGGAAAAAGTCACCATCAGATGCATAACCAGCACTGATATTGATGATGATTTGAACTGGTACCAACAGAAGCCAGGGGAACCCCCTAAGCTCCTTATTTCAGGAGACACTTCTCTTCGTCCTGGAGTCCCATCCCGATTCTCCAGCAGTGGCTATGGTTCAGATTTTGTTTTTACAATTGAGAACATGCTCTCAGAAGATGCTGCAGATTACTACTGTTTGCAATATGATAACTTGCCGTACACGTTCGGCGGTGGAACCAA
				2	IGKV4-74*01	IGKJ2*01	98.6	\	Yes	ATTGTGATCACCCAGTCTCCAGCAATCATGTCTGCATCTCTAGGGGAACGGGTCACCATGACCTGCACTGCCAGCTCAAGTGTAAGGTCCAGTTACTTGCACTGGTACCAGCAGAAGCCAGGATCCTCCCCCAAACTCTGGATTTATAGCACATCCAACCTGGCTTCTGGAGTCCCACCTCGCTTCAGTGGCAGTGGGTCTGGGACCTCTTACTCTCTCACAATCAGCAGCATGGAGGCTGAAGATGCTGCCACTTATTACTGCCACCAGTATCATCGTTCCCCATACACGTTCGGCGGTGGAACCAA
				3	IGKV14-111*01	IGKJ1*01	96.9	\	Yes	GACATTGTGATGACACAGACTCCATCTTCCATGTATGCATCTCTAGGAGAGAGAGTCACTATCACTTGCAAGGCGAGTCAGGACATTAATAACTATTTAAGCTGGTTCCAGCAGAAACCAGGGAAATCTCCTAAGATCCTGATCTATCGTGCAAACAGATTGGTAGATGGGGTCCCATCAAGGTTCAGTGGCAGTGGATCTGGGCAAGATTATTCTCTCACCATCAGCAGCCTGGAGTATGAAGATATGGAAATTTATTATTGTCAACAGTATGATGAGTTTCCTCGGACGTTCGGTGGTGGAACCAA
				4	IGKV4-74*01	IGKJ5*01	97.9	\	Yes	ATTGTGATCACACAGACTACAGCAATCATGTCTGCATCTCTAGGGGAACGGGTCACCATGACCTGCACTGCCAGCTCAAGTGTAAGTTCCAGTTACTTGCACTGGTACCAGCAGAAGCCAGGATCCTCCCCCAAACTCTGGATTTATAGCACATCCAACCTGGCTTCTGGAGTCCCACCTCGCTTCAGTGGCAGTGGGTCTGGGACCTCTTACTCTCTCACAATCAGCAGCATGGAGGCTGAAGATGCTGCCACTTATTACTGCCACCAGTATCATCGTTCCCCATACACGTTCGGTGGTGGAACCAA
				5	IGKV14-111*01	IGKJ1*01	97.1	\	Yes	TGACACAGACTCCATCTTCCATGTATGCATCTCTAGGAGAGAGAGTCACTATCACTTGCAAGGCGAGTCAGGACATTAATAACTATTTAAGCTGGTTCCAGCAGAAACCAGGGAAATCTCCTAAGGTCCTGATCTATCGTGCAAACAGATTGGTAGATGGGGTCCCATCAAGGTTCAGTGGCAGTGGATCTGGGCAAGATTATTCTCTCACCATCAGCAGCCTGGGGTATGAAGATATGGAAATTTATTATTGTCAACAGTATGATGAGTTTCCTCGGACGTTCGGCGGTGGAACCAA
				6	IGKV17-121*01	IGKJ2*01	94.2	\	Yes	ATGACCCAAACTACACCATCCCTGTCCATGGCTATAGGGGAAAAAGTCACCATCAGATGCATAACCAGCACTGATATTGATGATGATTTGAACTGGTACCAACAGAAGCCAGGGGAACCTCCTAAGCTCCTTATTTCAGGAGACACTTCTCTTCGTCCTGGAGTCCCATCCCGATTCTCCAGCAGTGGCTATGGTTCAGATTTTGTTTTTACAATTGAGAACATGCTCTCAGAAGATGCTGCAGATTACTACTGTTTGCAATATGATAACTTGCCGTACACGTTCGGTGGTGGAACCAA
				7	IGKV4-74*01	IGKJ2*01	94.7	\	Yes	ATTGTGATGACACAGACTACAGCTCTCATGTCTGTATCTCCAGGGGAGAAGGTCACCATGACCTGCACTGCCAGCTCAAGTGTAAGTTCCAGTTACTTGCACTGGTACCAGCAGAAGCCAGGATCCTCCCCCAAACTCTGGATTTATAGCACATCCAACCTGGCTTCTGGAGTCCCACCTCGCTTCAGTGGCAGTGGGTCTGGGACCTCTTACTCTCTCACAATCAGCAGCATGGAGGCTGAAGATGCTGCCACTTATTACCGCCACCAGTATCATCGTTCCCCATACACGTTCGGCGGTGGAACCAA
				8	IGKV17-121*01	IGKJ2*01	93.8	\	Yes	TGACCCAGACTCCACCATCCCTGTCCATGGCTATAGGGGAAAAAGTCACCATCAGATGCATAACCAGCACTGATATTGATGATGATTTGAACTGGTACCAACAGAAGCCAGGGGAACCTCCTAAGCTCCTTATTTCAGGAGACACTTCTCTTCGTCCTGGAGTCCTATCCCGATTCTCCAGCAGTGGCTATGGTTCAGATTTTGTTTTTACAATTGAGAACATGCCCTCAGAGGATGCTGCAGATTACTACTGTTTGCAATATGATAACTTGCCGTACACGTTCGGTGGTGGAACCAA
				9	IGKV17-121*01	IGKJ2*01	94.2	\	Yes	GACATTGTGATGACACAGACTACACCATCCCTGTCCATGGCTATAGGGGAAAAAGTCACCATCAGATGCATAACCAGCACTGATATTGATGATGATTTGAACTGGTACCAACAGAAGCCAGGGGAACCTCCTAAGCTCCTTATTTCAGGAGACACTTCTCTTCGTCCTGGAGTCCCATCCCGATTCTCCAGCAGTGGCTATGGTTCAGATTTTGTTTTTACAATTGAGAACATGCTCTCAGAAGATGCTGCAGATTACTACTGTTTGCAATATGATAACTTGCCGTACACGTTCGGTGGTGGAACCAA
				10	IGKV17-121*01	IGKJ2*01	94.2	\	Yes	GACATTGTGATGACACAGACTACACCATCCCTGTCCATGGCTATAGGGGAAAAAGTCACCATCAGATGCATAACCAGCACTGATATTGATGATGATTTGAACTGGTACCAACAGAAGCCAGGGGAACCTCCTAAGCTCCTTATTTCAGGAGACACTTCTCTTCGTCCTGGAGTCCCATCCCGATTCTCCAGCAGTGGCTATGGTTCAGATTTTGTTTTTACAATTGAGAACATGCTCTCAGAAGATGCTGCAGATTACTACTGTTTGCAATATGATAACTTGCCGTACACGTTCGGTGGTGGAACCAA
				11	IGKV17-121*01	IGKJ2*01	94.1	\	Yes	GACATTGTGATCACCCAGTCTACACCATCCCTGTCCATGGCTATAGGGGAAAAAGTCACCATCAGATGCATAACCAGCACTGATATTGATGATGATTTGAACTGGTACCAACAGAAGCCAGGGGAACCTCCTAAGCTCCTTATTTCAGGAGACACTTCTCTTCGTCCTGGAGTCCCATCCCGATTCTCCAGCAGTGGCTATGGTTCAGATTTTGTTTTTACAATCGAGAACATGCTCTCAGAAGATGCTGCAGATTACTACTGTTTGTAATATGATAACTTGCCGTACACGTTCGGCGGTGGAACCAA
	Isolated cardiomycyte of neonatal mice	neonatal CM		1	IGKV3-4*01	IGKJ1*01	93.9	\	Yes	GACATTCAGCTGACCCAGTCTCCAGCTTCTTTGGCTGTGTCTCTTGGGCAGAGGGCCACCATCTCCTGCAAGGCCAGCCAAAGTGTTGATTATGATGGTGATAGTTTTGTAAATTGGTACCATCAGAAACCGGGACAGCCACCCAAACTCCTCATCTATGTTGCATCCAATCTAGTCTCTGGGAGTCCAGCCAGGTTTAGTGGCAGTGGGTCTGGGACAGACTTCACCCTCAACATCCATCCTGTGGAGGAGGAGGATTCTGCAATCTATTACTGTCAGCAAAGTAGTGAGGATCCGTGGACGTTCGGTGGTGGAACCAA
				2	IGKV3-4*01	IGKJ1*01	94.3	\	Yes	GACATTCAGCTGACCCAGTCTCCAGCTTCTTTGGCTGTGTCTCTTGGGCAGAGGGCCACCATCTCCTGCAAGGCCAGCCAAAGTGTTGATTATGATGGTGATAGTTTTGTAAATTGGTACCATCAGAAACCGGGACAGCCACCCAAACTCCTCATCTATGTTGCATCCAATCTAGTCTCTGGGAGTCCAGCCAGGTTTAGTGGCAGTGGGTCTGGGACAGACTTCACCCTCAACATCCATCCTGTGGAGGAGGAGGATTCTGCAACCTATTACTGTCAGCAAAGTAGTGAGGATCCGTGGACGTTCGGCGGTGGAACCAA
				3	IGKV3-4*01	IGKJ1*01	94.3	\	Yes	GACATTCAGCTGACCCAGTCTCCAGCTTCTTTGGCTGTGTCTCTTGGGCAGAGGGCCACCATCTCCTGCAAGGCCAGCCAAAGTGTTGATTATGATGGTGATAGTTTTGTAAATTGGTACCATCAGAAACCGGGACAGCCACCCAAACTCCTCATCTATGTTGCATCCAATCTAGTCTCTGGGAGTCCAGCCAGGTTTAGTGGCAGTGGGTCTGGGACAGACTTCACCCTCAACATCCATCCTGTGGAGGAGGAGGATTCTGCAACCTATTACTGTCAGCAAAGTAGTGAGGATCCGTGGACGTTCGGCGGTGGAACCAA
				4	IGKV3-4*01	IGKJ1*01	93.9	\	Yes	GACATTCAGCTGACCCAGTCTCCAGCTTCTTTGGCTGTGTCTCTTGGGCAGAGGGCCACCATCTCCTGCAAGGCCAGCCAAAGTGTTGATTATGATGGTGATAGTTTTGTAAATTGGTACCATCAGAAACCGGGACAGCCACCCAAACTCCTCATCTATGTTGCATCCAATCTAGTCTCTGGGAGTCCAGCCAGGTTTAGTGGCAGTGGGTCTGGGACAGACTTCACCCTCAACATCCGTCCTGTGGAGGAGGAGGATTCTGCAACCTATTACTGTCAGCAAAGTAGTGAGGATCCGTGGACGTTCGGCGGTGGAACCAAGCT
				5	IGKV3-4*01	IGKJ1*01	94.3	\	Yes	GACATTCAGCTGACCCAGTCTCCAGCTTCTTTGGCTGTGTCTCTTGGGCAGAGGGCCACCATCTCCTGCAAGGCCAGCCAAAGTGTTGATTATGATGGTGATAGTTTTGTAAATTGGTACCATCAGAAACCGGGACAGCCACCCAAACTCCTCATCTATGTTGCATCCAATCTAGTCTCTGGGAGTCCAGCCAGGTTTAGTGGCAGTGGGTCTGGGACAGACTTCACCCTCAACATCCATCCTGTGGAGGAGGAGGATTCTGCAACCTATTACTGTCAGCAAAGTAGTGAGGATCCGTGGACGTTCGGCGGTGGAACCAA
		neonatal CF		1	IGKV14-126*01	IGKJ5*01	98.6	AT	Yes	GACATTCAGCTGACCCAGTCTCCATCCTCCATGTGTGCATCGCTGGGAGAGAGAGTCACTATCACTTGCAAGGCGAGTCAGGACATTAAAAGCTATTTAAGCTGGTACCAGCAGAAACCATGGAAATCTCCTAAGACCCTGATCTATTATGCAACAAGCTTGGCAGATGGGGTCCCATCAAGATTCAGTGGCAGTGGATCTGGGCAAGATTATTCTCTAACCATCAGCAGCCTGGAGTCTGACGATACAGCAACTTATTACTGTCTACAGCATGGTGAGAGCCCATTCACGTTCGGTGGTGGAACCAA
				2	IGKV14-126*01	IGKJ5*01	98.9	AT	Yes	GACATTCAGCTGACCCAGTCTCCATCCTCCATGTATGCATCGCTGGGAGAGAGAGTCACTATCACTTGCAAGGCGAGTCAGGACATTAAAAGCTATTTAAGCTGGTACCAGCAGAAACCATGGAAATCTCCTAAGACCCTGATCTATTATGCAACAAGCTTGGCAGATGGGGTCCCATCAAGATTCAGTGGCAGTGGATCTGGGCAAGATTATTCTCTAACCATCAGCAGCCTGGAGTCTGACGATACAGCAACTTATTACTGTCTACAGCATGGTGAGAGCCCATTCACGTTCGGCGGTGGAACCAAGCT
				3	IGKV14-126*01	IGKJ5*01	98.9	AT	Yes	GACATTCAGCTGACCCAGTCTCCATCCTCCATGTATGCATCGCTGGGAGAGAGAGTCACTATCACTTGCAAGGCGAGTCAGGACATTAAAAGCTATTTAAGCTGGTACCAGCAGAAACCATGGAAATCTCCTAAGACCCTGATCTATTATGCAACAAGCTTGGCAGATGGGGTCCCATCAAGATTCAGTGGCAGTGGATCTGGGCAAGATTATTCTCTAACCATCAGCAGCCTGGAGTCTGACGATACAGCAACTTATTACTGTCTACAGCATGGTGAGAGCCCATTCACGTTCGGCGGTGGAACCAAGCT
				4	IGKV14-126*01	IGKJ5*01	98.6	AT	Yes	GACATTCAGCTGACCCAGTCTCCATCCTCCATGTATGCATCGCTGGGAGAGAGAGTCACTATCACTTGCAAGGCGAGTCAGGACATTAAAAGCTATTTAAGCTGGTACCAGCAGAAACCATGGAAATCTCCTAAGACCCTGATCTATTATGCAACAAGCTTGGCAGATGGGGTCCCATCAAGATTCAGTGGCAGTGGATCTGGGCAAGATTATTCTCTAACCATCAGCAGCCAGGAGTCTGACGATACAGCAACTTATTACTGTCTACAGCATGGTGAGAGCCCATTCACGTTCGGTGGTGGAACCAAGCT
				5	IGKV14-126*01	IGKJ5*01	100	AT	Yes	GACATCAAGATGACCCAGTCTCCATCCTCCATGTATGCATCGCTGGGAGAGAGAGTCACTATCACTTGCAAGGCGAGTCAGGACATTAAAAGCTATTTAAGCTGGTACCAGCAGAAACCATGGAAATCTCCTAAGACCCTGATCTATTATGCAACAAGCTTGGCAGATGGGGTCCCATCAAGATTCAGTGGCAGTGGATCTGGGCAAGATTATTCTCTAACCATCAGCAGCCTGGAGTCTGACGATACAGCAACTTATTACTGTCTACAGCATGGTGAGAGCCCATTCACGTTCGGCGGTGGAACCAA
	mice cardiomycoyte cell line	HL-1		1	IGKV17-121*01	IGKJ2*01	99.3	\	Yes	TGACCCAGTCTCCAGCATCCCTGTCCATGGCTATAGGAGAAAAAGTCACCATCAGATGCATAACCAGCACTGATATTGATGATGATATGAACTGGTACCAGCAGAAGCCAGGGGAACCTCCTAAGTTCCTTATTTCAGGAGGCAATACTCTTCGTCCTGGAGTCCCATCCCGATTCTCCAGCAGTGGCTATGGTACAGATTTTGTTTTTACAATTGAAAACATGCTCTCAGAAGATGTTGCAGATTACTACTGTTTGCAAAGTGATAACTTGCCTCTGTACACG
				2	IGKV17-121*01	IGKJ2*01	99.3	\	Yes	TGACCCAGTCTCCAGCATCCCTGTCCATGGCTATAGGAGAAAAAGTCACCATCAGATGCATAACCAGCACTGATATTGATGATGATATGAACTGGTACCAGCAGAAGCCAGGGGAACCTCCTAAGTTCCTTATTTCAGAAGGCAATACTCTTCGTCCTGGAGTCCCATCCCGATTCTCTAGCAGTGGCTATGGTACAGATTTTGTTTTTACAATTGAAAACATGCTCTCAGAAGATGTTGCAGATTACTACTGTTTGCAAAGTGATAACTTGCCTCTGTACACG
				3	IGKV17-121*01	IGKJ2*01	99.3	\	Yes	TGACCCAGTCTCCAGCATCCCTGTCCATGGCTATAGGAGAAAAAGTCACCATCGGATGCATAACCAGCACTGATATTGATGATGATATGAACTGGTACCAGCAGAAGCCAGGGGAACCTCCTAAGTTCCTTATTTCAGAAGGCAATACTCTTCGTCCTGGAGTCCCATCCCGATTCTCCAGCAGTGGCTATGGTACAGATTTTGTTTTTACAATTGAAAACATGCTCTCAGAAGATGTTGCAGATTACTACTGTTTGCAAAGTGATAACTTGCCTTTGTACACG
				4	IGKV17-121*01	IGKJ2*01	98.9	\	Yes	TGACCCAGTCTCCAGCATCCCTGTCCATGGCTATAGGAGAAAAAGTCACCATCAGATGCATAACCAGCGCTGATATTGATGATGATATGGACTGGTACCAGCAGAAGCCAGGGGAACCTCCTAAGTTCCTTATTTCAGAAGGCAATACTCTTCGTCCTGGAGTCCCATCCCGATTCTCCAGCAGTGGCTATGGTACAGATTTTGTTTTTACAATTGAAAACATGCTCTCAGAAGATGTTGCAGATTACTACTGTTTGCAAAGTGATAACTTGCCTCTGTACACG
				5	IGKV17-121*01	IGKJ2*01	98.9	\	Yes	TGACCCAGTCTCCAGCATCCCTGTCCATGGCTATAGGAGAAAAAGTCACCATCAGATGCATAACCAGCGCTGATATTGATGATGATATGGACTGGTACCAGCAGAAGCCAGGGGAACCTCCTAAGTTCCTTATTTCAGAAGGCAATACTCTTCGTCCTGGAGTCCCATCCCGATTCTCCAGCAGTGGCTATGGTACAGATTTTGTTTTTACAATTGAAAACATGCTCTCAGAAGATGTTGCAGATTACTACTGTTTGCAAAGTGATAACTTGCCTCTGTACACG
				6	IGKV17-121*01	IGKJ2*01	99.6	\	Yes	TGACCCAGTCTCCAGCATCCCTGTCCATGGCTATAGGAGAAAAAGTCACCATCAGATGCATAACCAGCACTGATATTGATGATGATATGAACTGGTACCAGCAGAAGCCAGGGGAACCTCCTAAGTTCCTTATTTCAGAAGGCAATACTCTTCGTCCTGGAGTCCCATCCCGATTCTCCAGCAGTGGCTATGGTACAGATTTTGTTTTTACAATTGAAAACATGCTCTCAGAAGATGTTGCAGATTACTACTGTTTGCAAAGTGATAACTTGCCTCTGTACACG
				7	IGKV17-121*01	IGKJ2*01	99.3	\	Yes	TGACCCAGTCTCCAACATCCCTGTCCATGGCTATAGGAGAAAAAGTCACCATCAGATGCATAACCAGCACTGATATTGATGATGATATGAACTGGTACCAGCAGAAGCCAGGGGAACCTCCTAAGTTCCTTATTTCAGAAGGCAATACTCTTCGTCCTGGAGTCCCATCCCGATTCTCCAGCAGTGGCTATGGTACAGATTTTGTTTTTACAATTGAAAACATGCTCTCAGAAGATGTTGCAGATTACTACTGTTTGCAAAGTGATAACTTGCCTCTGTACACG
	myocardial single cell	WT-1	1	1	IGKV14-111*01	IGKJ1*01	100	\	Yes	TGACCCAGTCTCCATCTTCCATGTATGCATCTCTAGGAGAGAGAGTCACTATCACTTGCAAGGCGAGTCAGGACATTAATAGCTATTTAAGCTGGTTCCAGCAGAAACCAGGGAAATCTCCTAAGACCCTGATCTATCGTGCAAACAGATTGGTAGATGGGGTCCCATCAAGGTTCAGTGGCAGTGGATCTGGGCAAGATTATTCTCTCACCATCAGCAGCCTGGAGTATGAAGATATGGGAATTTATTATTGTCTACAGTATGATGAGTTTCCTCCGACGTTCGGTGGAGGCACCAAGCTGGAAATCAAAC
				2	IGKV17-121*01	IGKJ2*01	99.2	ACA	Yes	TATAGGAGAAAAAGTCACCATCAGATGCATAACCAGCACTGATATTGATGATGATATGAACTGGTACCAGCAGAAGCCAGGGGAACCTCCTAAGCTCCTTATTTCAGAGGGCAATACTCCTCGTCCTGGAGTCCCATCCCGATTCTCCAGCAGTGGCTATGGTACAGATTTTGTTTTTACAATTGAAAACATGCTCTCAGAAGATGTTGCAGATTACTACTGTTTGCAAAGTGATAACTTGCCTCACATGTACACGTTCGGAGGGGGGACCAAGCTGGAAATAAAAC
				3	IGKV17-121*01	IGKJ5*01	98	CG	Yes	TATAGGAGAAAAGGTCACCATCAGATGCATAACCAGCACTGATATTGATGATGATATGAACTGGTACCAGCAGAAGCCAGGGGAACCTCCTAAGCTCCTTATTTCAGAAGGCAATACTCTTCGTCCTGGAGTCCCATCCCGATTCTCCAGCAGTGGCTATGGTACAGATTTTGTTTTTACGATTGAAAACACGCTCTCAGAAGATGTTGCAGATTACTACTGTTTGCAAAGTGATAACATGCCGCTCGCGTTCGGTGCTGGGACCAAGCTGGAGCTGAAAC
				4	IGKV17-121*01	IGKJ2*01	99.2	ACA	Yes	AGCATCCCTGTCCATGGCTATAGGAGAAAAAGTCACCATCAGATGCATAACCAGCACTGATATTGATGATGATATGAACTGGTACCAGCAGAGGCCAGGGGAACCTCCTAAGCTCCTTATTTCAGAAGGCAATACTCTTCGTCCTGGAGTCCCATCCCGACTCTCCAGCAGTGGCTATGGTACAGATTTTGTTTTTACAATTGAAAACATGCTCTCAGAAGATGTTGCAGATTACTACTGTTTGCAAAGTGATAACTTGCCTCACATGTACACGTTCGGAGGGGGGACCAAGCTGGAAATAAAAC
				5	IGKV17-121*01	IGKJ2*01	99.2	GCA	Yes	TATAGGAGAAAAAGTCACCATCAGATGCATAACCAGCACTGATATTGACGATGATATGAACTGGTACCAGCAGAAGCCAGGGGAACCTCCTAAGCTCCTTATTTCAGAAGGCAATACTCTTCGTCCTGGAGTCCCATCCCGATTCTCCAGCAGTGGCCATGGTACAGATTTTGTTTTTACAATTGAAAACATGCTCTCAGAAGATGTTGCAGATTACTACTGTTTGCAAAGTGATAACTTGCCTCGCATGTACACGTTCGGAGGGGGGACCAAGCTGGAAATAAAAC
				6	IGKV14-111*01	IGKJ2*01	98.1	\	Yes	GTCCATGTATGCATCGCTGGGAGAGAGAGTCACTATCACTTGCAAGGCGAGTCAGGACATTAAAAGCTATTTAAGCTGGTACCAGCAGAAACCAGGGAAATCTCCTAAGACCCTGATCTATCGTGCAAACAGATTGGTAGATGGGGTCCCATCAAGGTTCAGTGGCAGTGGATCTGGGCAAGATTATCCTCTCACCATCAGCAGCCTGGAGTATGAAGATATGGGAATTTATTATTGTCTACAGTATGATGAGTTTCCGTACACGTTCGGAGGGGGGACCAGGCTGGAAATAAAAC
				7	IGKV14-111*01	IGKJ2*01	98.4	\	Yes	CTCCATGTATGCATCGCTGGGAGAGAGAGTCACTATCACTTGCAAGGCGAGTCAGGACATTAAAAGCTATTTAAGCTGGTACCAGCAGAAACCAGGGAAATCTCCTAAGACCCTGATCTATCGTGCAAACAGATTGGTAGATGGGGTCCCATCAAGGTTCAGTGGCAGTGGATCTGGGCAAGATTATTCTCTCACCATCAGCAGCCTGGAGTATGAAGATATGGGAATTTATTATTGTCTACAGTATGATGAGTTTCCGTACACGTTCGGAGGGGGGACCAAGCTGGAAATAAAAC
				8	IGKV14-111*01	IGKJ2*01	98.1	\	Yes	CTCCATGTATGCATCGCTGGGAGAGAGAGTCACTATCACTTGCAAGGCGAGTCAGGACATTAAAAGCTATTTAAGCTGGTACCAGCAGAAACCAGGGAAATCTCCTAAGACCCTGATCTATCGTGCAAACAGATTGGTAGATGGGGTCCCATCAAGGTTCAGTGGCAGCGGATCTGGGCAAGATTATTCTCTCACCATCAGCAGCCTGGAGTATGAAGATATGGGAATTTATTATTGTCTACAGTATGATGAGTTTCCGTACACGTTCGGAGGGGGGACCAAGCTGGAAATAAAAC
				9	IGKV14-111*01	IGKJ2*01	98.1	\	Yes	CTCCATGTATGCATCGCTGGGAGAGAGAGTCACTATCACTTGCAAGGCGAGTCAGGACATTAAAAGCTATTTAAGCTGGTACCAGCAGAAACCAGGGAAATCTCCTAAGACCCTGATCTATCGTGCAAACAGATTGGTAGATGGGGTCCCATCAAGGTTCAGTGGCAGTGGATCTGGGCAGGATTATTCTCTCACCATCAGCAGCCTGGAGTATGAAGATATGGGAATTTATTATTGTCTACAGTATGATGAGTTTCCGTACACGTTCGGAGGGGGGACCAAGCTGGAAATAAAAC
				10	IGKV14-111*01	IGKJ1*01	100	\	Yes	TTCCATGTATGCATCTCTAGGAGAGAGAGTCACTATCACTTGCAAGGCGAGTCAGGACATTAATAGCTATTTAAGCTGGTTCCAGCAGAAACCAGGGAAATCTCCTAAGACCCTGATCTATCGTGCAAACAGATTGGTAGATGGGGTCCCATCAAGGTTCAGTGGCAGTGGATCTGGGCAAGATTATTCTCTCACCATCAGCAGCCTGGAGTATGAAGATATGGGAATTTATTATTGTCTACAGTATGATGAGTTTCCTCCGACGTTCGGTGGAGGCACCAAGCTGGAAATCAAAC
				11	IGKV17-121*01	IGKJ1*01	99.2	GTAC	Yes	TATAGGAGGAAAAGTCACCATCAGATGCATAACCAGCACTGATATTGATGATGATATGAACTGGTACCAGCAGAAGCCAGGGGAACCTCCTAAGTTCCTTATTTCAGAAGGCAATACTCTTCGTCCTGGAGTCCCATCCCGATTCTCCAGCAGTGGCTATGGTACAGATTTTGTTTTTACAATTGAAAACATGCTCTCAGAAGATGTTGCAGATTACTACTGTTTGCAAAGTGATAACTTGCCTCTGTACACGTTCGGTGGTGGAACCAAGCTGGAAATCAAAC
				12	IGKV17-121*01	IGKJ1*01	99.6	GTAC	Yes	TATAGGAGAAAAAGTCACCATCAGATGCATAACCAGCACTGATATTGATGATGATATGAACTGGTACCAGCAGAAGCCAGGGGAACCTCCTAAGTTCCTTATTTCAGAAGGCAATACTCTTCGTCCTGGAGTCCCATCCCGATTCTCCAGCAGTGGCTATGGTACAGATTTTGTTTTTACAATTGAAAACATGCTCTCAGAAGATGTTGCAGATTACTACTGTTTGCAAAGTGATAACTTGCCTCTGTACACGTTCGGTGGTGGAACCAAGCTGGGAATCAAAC
				13	IGKV17-121*01	IGKJ1*01	99.6	GTAC	Yes	TATAGGAGAAAAAGTCACCATCAGATGCATAACCAGCACTGATATTGATGATGATATGAACTGGTACCAGCAGAAGCCAGGGGAACCTCCTAAGTTCCTTATTTCAGAAGGCAATACTCTTCGTCCTGGAGTCCCATCCCGATTCTCCAGCAGTGGCTATGGTACAGATTTTGTTTTTACAATTGAAAACATGCTCTCAGAAGATGTTGCAGATTACTACTGTTTGCAAAGTGATAACTTGCCTCTGTACACGTTCGGTGGTGGAACCAAGCTGGGAATCAAAC
				14	IGKV14-111*01	IGKJ2*01	98.1	\	Yes	ATCCTCCATGTATGCATCGCTGGGAGAGAGAGTCACTATCACTTGCAAGGCGAGTCAGGACATTAAAAGCTATTTAAGCTGGTACCAGCAGAAACCAGGGAAATCTCCTAAGACCCTGATCTATCGTGCAAACAGATTGGTAGATGGGGTCCCATCAAGGTTCAGTGGCAGTGGATCTGGGCAAGATTATTCTCTCACCATCAGCAGCCTGGAGTATGAAGATATGGGAATTTATTATTGTCTACAGTATGATGAGTTTCCGTACACGTTCGGAGGGGGGACCAAGCTGGAAATAAAAC
				15	IGKV14-111*01	IGKJ2*01	98.1	\	Yes	CTCCATGTATGCACCGCTGGGAGAGAGAGTCACTATCACTTGCAAGGCGAGTCAGGACATTAAAAGCTATTTAAGCTGGTACCAGCAGAAACCAGGGAAATCTCCTAAGACCCTGATCTATCGTGCAAACAGATTGGTAGATGGGGTCCCATCAAGGTTCAGTGGCAGTGGATCTGGGCAAGATTATTCTCTCACCATCAGCAGCCTGGAGTATGAAGATATGGGAATTTATTATTGTCTACAGTATGATGAGTTTCCGTACACGTTCGGAGGGGGGACCAAGCTGGAAATAAAAC
			2	1	IGKV14-111*01	IGKJ5*01	99.6	\	Yes	TTCCATGTATGCATCTCTAGGAGAGAGAGTCACTATCACTTGCAAGGCGAGTCAGGACATTAATAGCTATTTAAGCTGGTTCCAGCAGAAACCAGGGAAATCTCCTAAGACCCTGATCTATCGTGCAAACAGATTGGTAGATGGGGTCCCATCAAGGTTCAGTGGCAGTGGATCTGGGCGAGATTATTCTCTCACCATCAGCAGCCTGGAGTATGAAGATATGGGAATTTATTATTGTCTACAGTATGATGAGTTTCCGCTCACGTTCGGTGCTGGGACCAAGCTGGAGCTGAAAC
				2	IGKV14-111*01	IGKJ5*01	90	\	Yes	TAGGAGAAAAAGTCACCATCAGATGCATAACCAGCACTGATATTGATGATGATATGAACTGGTACCAGCAGAAACCAGGGAAATCTCCTAAGACCCTGATCTATCGTGCAAACAGATTGGTAGATGGGGTCCCATCAAGGTTCAGTGGCAGTGGATCTGGGCGAGATTATTCTCTCACCATCAGCAGCCTGGAGTATGAAGATATGGGAATTTATTATTGTCTACAGTATGATGAGTTTCCGCTCACGTTCGGTGCTGGGACCAAGCTGGAGCTGAAAC
				3	IGKV14-111*01	IGKJ5*01	99.6	\	Yes	TTCCATGTATGCATCTCTAGGAGAGAGAGTCACTATCACTTGCAAGGCGAGTCAGGACATTAATAGCTATTTAAGCTGGTTCCAGCAGAAACCAGGGAAATCTCCTAAGACCCTGATCTATCGTGCAAACAGATTGGTAGATGGGGTCCCATCAAGGTTCAGTGGCAGTGGATCTGGGCGAGATTATTCTCTCACCATCAGCAGCCTGGAGTATGAAGATATGGGAATTTATTATTGTCTACAGTATGATGAGTTTCCGCTCACGTTCGGTGCTGGGACCAAGCTGGAGCTGAAAC
				4	IGKV17-121*01	IGKJ1*01	99.2	GTAC	Yes	TATAGGAGAAAAAGTCACCATCAGATGCATAACCAGCACTGATATTGATGATGATATGAACTGGTACCAGCAGAAGCCAGGGGAACCTCCTAAGTTCCTTATTTCAGAAGGCAATACTCTTCGTCCTGGAGTCCCATCCCGATTCTCCAGCAGTGGCTATGGTACGGATTTTGTTTTTACAATTGAAAACATGCTCTCAGAAGATGTTGCAGATTACTACTGTTTGCAAAGTGATAACTTGCCTCTGTACACGTTCGGTGGTGGAATCAAGCTGGAAATCAAAC
				5	IGKV14-111*01	IGKJ5*01	99.2	\	Yes	TTCCATGTATGCATCTCTAGGAGAGAGAGTCGCTATCACTTGCAAGGCGAGTCAGGACATTAATAGCTATTTAAGCTGGTTCCAGCAGAAACCAGGGAAATCTCCTAAGACCCTGATCTATCGTGCAAACAGATTGGTAGATGGGGTCCCATCAAGGTTCAGTGGCAGTGGATCTGGGCGAGATTATTCTCTCACCATCAGCAGCCTGGAGTATGAAGATATGGGAATTTATTATTGTCTACAGTATGATGAGTTTCCGCTCACGTTCGGTGCTGGGACCAAGCTGGAGCTGAAAC
				6	IGKV14-111*01	IGKJ1*01	100	\	Yes	TTCCATGTATGCATCTCTAGGAGAGAGAGTCACTATCACTTGCAAGGCGAGTCAGGACATTAATAGCTATTTAAGCTGGTTCCAGCAGAAACCAGGGAAATCTCCTAAGACCCTGATCTATCGTGCAAACAGATTGGTAGATGGGGTCCCATCAAGGTTCAGTGGCAGTGGATCTGGGCAAGATTATTCTCTCACCATCAGCAGCCTGGAGTATGAAGATATGGGAATTTATTATTGTCTACAGTATGATGAGTTTCCTCCGACGTTCGGTGGAGGCACCAAGCTGGAAATCAAAC
				7	IGKV17-121*01	IGKJ1*01	99.2	GTAC	Yes	AGCATCCCTGTCCATGGCTATAGGAGAAAAAGTCACCATCAGATGCATAACCAGCACTGATATTGATGATGATATGAACTGGTACCAGCAGAAGCCAGGGGAACCTCCTAAGTTCCTTATTTCAGAAGGCAATACTCTTCGTCCTGGAGTCCCATCCCGATTCTCCAGCAGTGGCTATGGTACAGATTTTGTTTTTACAATTGAAAACATGCTCTCAGAAGATGTTGCAGATTACTACTGTTTGCAAAGTGATAACTTGCCTCTGTACACGTTCGGTGGTGGAACCAAGCTGGGAATCAAAC
				8	IGKV17-121*01	IGKJ1*01	98.8	GTAC	Yes	TATATGGATCCGGCGCGCCCTCGAGATATAGGAGAAAAAGTCACCATCAGATGCATAACCAGCACTGATATTGATGATGATATGAACTGGTACCAGCAGAAGCCAGGGGAACCTCCTAAGTTCCTTATTTCAGAAGGCAATACTCTTCGTCCTGGAGTCCCATCCCGATTCTCCGGCAGTGGCTATGGTACAGATCTTGTTTTTACAATTGAAAACATGCTCTCAGAAGATGTTGCAGATTACTACTGTTTGCAAAGTGATAACTTGCCTCTGTACACGTTCGGTGGTGGAACCAAGCTGGAAATCAAAC
			3	1	IGKV4-59*01	IGKJ5*01	96.2	\	Yes	CAATCATGTCTGCATCTCCAGGGGAAAAGGTCACCATGACCTGCAGTGCCAGCTCAAGTGTAAGTTACATGCACTGGTACCAGCAGAAGTCAAGCACCTCCCCCAAACTCTGGATTTATGACACATCCAAACTGGCTTCTGGAGTCCCGGGTCGCTTCAGTGGCAGTGGGTCTGGAAACTCTTACTCTCTCACAATCAGCAGCATGGAGGCTGAAGATGCTGCCACTTATTACTGCCAGCAGTGGAGTAGTAACCCGCCCACGTTCGGTGCTGGGACCAAGCTGGAGCTGAAAC
				2	IGKV4-59*01	IGKJ5*01	95.8	\	Yes	CAATCATGTCTGCATCTCCAGGGGAAAAGGTCACCATGACCTGCAGTGCCAGCTCAAGTGTAAGTTACATGCACTGGTACCAGCAGAAGTCAAGCACCTCCCCCAAACTCTGGATTTATGACACATCCAAACTGGCTTCTGGAGTCCCGGGTCGCTTCAGTGGCAGTGGGTCTGGAAACTCTTACTCTCTCACAATCAGCAGCATGGAGGCTGAAGATGCTGCCACTTATTACTGCCAGCAGTGGAGTAGTAACCCGCTCACGTTCGGTGCTGGGACCAAGCTGGAGCTGAA
				3	IGKV4-59*01	IGKJ5*01	95.4	\	Yes	ATCAATCATGTCTGCATCTCCAGGGGAAAAGGTCACCATGACCTGCAGTGCCAGCTCAAGTGTAAGTTACATGCACTGGTACCAGCAGAAGTCAAGCACCTCCCCCAAACTCTGGATTTATGACACATCCAAGCTGGCTTCTGGAGTCCCGGGTCGCTTCAGTGGCAGTGGGTCTGGAAACTCTTACTCTCTCACAATCAGCAGCATGGAGGCTGAAGATGCTGCCACTTATTACTGCCAGCAGTGGAGTAGTAACCCGCTCACGTTCGGTGCTGGGACCAAGCTGGAGCTGAAA
				4	IGKV4-59*01	IGKJ5*01	95	\	Yes	ATCAATCATGTCTGCATCTCCAGGGGAAAAGGTCACCATGACCTGCAGTGCCAGCTCAAGTGTAAGTTACATGCACTGGTACCAGCAGAAGTCAAGCACCTCCCCCAAACTCTGGATTTATGACACATCCAAACTGGCTTCTGGAGTCCCGGGTCGCTTCAGTGGCAGTGGGTCTGGAAACTCTTACTCTCTCGCAATCAGCAGCATGGAGGCTGAAGATGCTGCCACTTATCACTGCCAGCAGTGGAGTAGTAACCCGCTCACGTTCGGTGCTGGGACCAAGCTGGAGCTGAAAC
				5	IGKV4-59*01	IGKJ5*01	95.8	\	Yes	ATCAATCATGTCTGCATCTCCAGGGGAAAAGGTCACCATGACCTGCAGTGCCAGCTCAAGTGTAAGTTACATGCACTGGTACCAGCAGAAGTCAAGCACCTCCCCCAAACTCTGGATTTATGACACATCCAAACTGGCTTCTGGAGTCCCGGGTCGCTTCAGTGGCAGTGGGTCTGGAAACTCTTACTCTCTCACAATCAGCAGCATGGAGGCTGAAGATGCTGCCACTTATTACTGCCAGCAGTGGAGTAGTAACCCGCTCACGTTCGGTGCTGGGACCAAGCTGGAGCTGAAAC
				6	IGKV4-59*01	IGKJ5*01	95.8	GT	Yes	CCATCAATCATGTCTGCATCTCCAGGGGAAAAGGTCACCATGACCTGCAGTGCCAGCTCAAGTGTAAGTTACATGCACTGGTACCAGCAGAAGTCAAGCACCTCCCCCAAACTCTGGATTTATGACACATCCAAACTGGCTTCTGGAGTCCCGGGTCGCTTCAGTGGCAGTGGGTCTGGAAACTCTTACTCTCTCACAATCAGCAGCATGGAGGCTGAAGATGCTGCCACTCATTACTGCCAGCAGTGGAGTAGTAACCCGTTCACGTTCGGTGCTGGGACCAAGCTGGGGCTGAAAC
			4	1	IGKV9-120*01	IGKJ1*01	99.2	C	Yes	CCATCCTCCTTATCTGCCTCTCTGGGAGAAAGAGTCAGTCTCACTTGTCGGGCAAGTCAGGACATTGGTAGTAGCTTAAACTGGCTTCAGCAGGAACCAGATGGAACTATTAAACGCCTGATCTACGCCACATCCAGTTTAGATTCTGGTGTCCCCAAAAGGTTCAGTGGCAGTAGGCCTGGGTCAGATTATTCTCTCACCATCAGCAGCCTTGAGTCTGAAGATTTTGTAGACTATTACTGTCTACAATATGCTAGTTCTCCTCGGACGTTCGGTGGAGGCACCAAGCTGGAAATCAAAC
				2	IGKV9-120*01	IGKJ1*01	98.9	C	Yes	CCATCCTCCTTATCTGCCTCTCTGGGAGAAAGAGTCAGTCTCACTTGTCGGGCAAGTCAGGACATTGGTAGTAGCTTAAACTGGCTTCAGCAGGAACCAGATGGAACTATTAAACGCCTGATCTACGCCACATCCAGTTTAGATTCTGGTGTCCCCCAAAGGTTCAGTGGCAGTAGGTCTGGGTCAGATTATTCTCTCACCATCAGCAGCCTTGAGTCTGAAGATTTTGCAGACTATTACTGTCTACAATATGCTAGTTCTCCTCGGACGTTCGGTGGAGGCACCAAGCTGGAAATCAAAC
				3	IGKV9-120*01	IGKJ2*01	97.7	\	Yes	CCATCCTCCTTATCTGCCTCTCTGGGAGAAAGAGTCAGTCTCACTTGTCGGGCAAGTCAGGACATTGGTGGTAGCTTAGACTGGCTTCAGCAGGAACCAGATGGAACTATTGAACGCCTGATCTACGCCACATCCAGTTTAGATCCTGGTGTCCCCAAAAGGTTCAGTGGCAGTAGGTCTGGGTCAGATTATTCTCTCATCATCAGCAGCCTTGAGTCTGAAGATTTTGTAGACTATTACTGTCTACAATATGCTAGTTCTCCGTACACGTTCGGAGGGGGGACCAAGCTGGAAATAAAAC
				4	IGKV9-120*01	IGKJ2*01	97.3	\	Yes	CCATCCTCCTTATCTGCCTCTCTGGGAGAAAGAGTCAGGCTCACTTGTCGGGCAAGTCAGGACATTGGTGGTAGCTTAAACTGGCTTCAGCAGGAACCAGATGGAACTATTGAACGCCTGATCTACGCCACATCCAGTTTAGATCCTGGTGTCCCCAAAAGGTTCAGTGGCAGTAGGTCTGGGTCAGATTATTCTCTCATCATCAGCGGCCTTGAGTCTGAAGATTTTGTAGACTATTACTGTCTACAATATGCTAGTTCTCCGTACACGTTCGGAGGGGGGACCAAGCTGGAAATAAAAC
				5	IGKV9-120*01	IGKJ2*01	98.1	\	Yes	CCATCCTCCTTATCTGCCTCTCTGGGAGAAAGAGTCAGTCTCACTTGTCGGGCAAGTCAGGACATTGGTGGTAGCTTAAACTGGCTTCAGCAGGAACCAGATGGAACTATTGAACGCCTGATCTACGCCACATCCAGTTTAGATCCTGGTGTCCCCAAAAGGTTCAGTGGCAGTAGGTCTGGGTCAGATTATTCTCTCATCATCAGCAGCCTTGAGTCTGAAGATTTTGTAGACTATTACTGTCTACAATATGCTAGTTCTCCGTACACGTTCGGAGGGGGGACCAAGCTGGAAATAAAAC
				6	IGKV9-120*01	IGKJ1*01	99.6	C	Yes	CCATCCTCCTTATCTGCCTCTCTGGGAGAAAGAGTCAGTCTCACTTGTCGGGCAAGTCAGGACATTGGTAGTAGCTTAAACTGGCTTCAGCAGGAACCAGATGGAACTATTAAACGCCTGATCTACGCCACATCCAGTTTAGATTCTGGTGTCCCCAAAAGGTTCAGTGGCAGTAGGTCTGGGTCAGATTATTCTCTCACCATCAGCAGCCTTGAGTCTGAAGATTTTGTAGACTATTACTGTCTACAATATGCTAGTTCTCCTCGGACGTTCGGTGGAGGCACCAAGCTGGAAATCAAAC
				7	IGKV9-120*01	IGKJ1*01	99.6	C	Yes	CCATCCTCCTTATCTGCCTCTCTGGGAGAAAGAGTCAGTCTCACTTGTCGGGCAAGTCAGGACATTGGTAGTAGCTTAAACTGGCTTCAGCAGGAACCAGATGGAACTATTAAACGCCTGATCTACGCCACATCCAGTTTAGATTCTGGTGTCCCCAAAAGGTTCAGTGGCAGTAGGTCTGGGTCAGATTATTCTCTCACCATCAGCAGCCTTGAGTCTGAAGATTTTGTAGACTATTACTGTCTACAATATGCTAGTTCTCCTCGGACGTTCGGTGGAGGCACCAAGCTGGAAATCAAAC
			5	1	IGKV14-111*01	IGKJ5*01	99.6	\	Yes	TTCCATGTATGCATCTCTAGGAGAGAGAGTCACTATCACTTGCAAGGCGAGTCAGGACATTAATAGCTATTTAAGCTGGTTCCAGCAGAAGCCAGGGAAATCTCCTAAGACCCTGATCTATCGTGCAAACAGATTGGTAGATGGGGTCCCATCAAGGTTCAGTGGCAGTGGATCTGGGCAAGATTATTCTCTCACCATCAGCAGCCTGGAGTATGAAGATATGGGAATTTATTATTGTCTACAGTATGATGAGTTTCCGCTCACGTTCGGTGCTGGGACCAAGCTGGAGCTGAAAC
				2	IGKV14-111*01	IGKJ5*01	99.6	\	Yes	TTCCATGTATGCATCTCTAGGAGAGAGAGTCACTATCACTTGCAAGGCGAGTCAGGACATTAATAGCTATTTAAGCTGGTTCCAGCAGAAGCCAGGGAAATCTCCTAAGACCCTGATCTATCGTGCAAACAGATTGGTAGATGGGGTCCCATCAAGGTTCAGTGGCAGTGGATCTGGGCAAGATTATTCTCTCACCATCAGCAGCCTGGAGTATGAAGATATGGGAATTTATTATTGTCTACAGTATGATGAGTTTCCGCTCACGTTCGGTGCTGGGACCAAGCTGGAGCTGAAAC
				3	IGKV14-111*01	IGKJ5*01	99.6	\	Yes	TTCCATGTATGCATCTCTAGGAGAGAGAGTCACTATCACTTGCAAGGCGAGTCAGGACATTAATAGCTATTTAAGCTGGTTCCAGCAGAAGCCAGGGAAATCTCCTAAGACCCTGATCTATCGTGCAAACAGATTGGTAGATGGGGTCCCATCAAGGTTCAGTGGCAGTGGATCTGGGCAAGATTATTCTCTCACCATCAGCAGCCTGGAGTATGAAGATATGGGAATTTATTATTGTCTACAGTATGATGAGTTTCCGCTCACGTTCGGTGCTGGGACCAAGCTGGAGCTGAAAC
				4	IGKV14-111*01	IGKJ5*01	99.6	\	Yes	TTCCATGTATGCATCTCTAGGAGAGAGAGTCACTATCACTTGCAAGGCGAGTCAGGACATTAATAGCTATTTAAGCTGGTTCCAGCAGAAGCCAGGGAAATCTCCTAAGACCCTGATCTATCGTGCAAACAGATTGGTAGATGGGGTCCCATCAAGGTTCAGTGGCAGTGGATCTGGGCAAGATTATTCTCTCACCATCAGCAGCCTGGAGTATGAAGATATGGGAATTTATTATTGTCTACAGTATGATGAGTTTCCGCTCACGTTCGGTGCTGGGACCAAGCTGGAGCTGAAAC
				5	IGKV14-111*01	IGKJ5*01	99.6	\	Yes	TTCCATGTATGCATCTCTAGGAGAGAGAGTCACTATCACTTGCAAGGCGAGTCAGGACATTAATAGCTATTTAAGCTGGTTCCAGCAGAAGCCAGGGAAATCTCCTAAGACCCTGATCTATCGTGCAAACAGATTGGTAGATGGGGTCCCATCAAGGTTCAGTGGCAGTGGATCTGGGCAAGATTATTCTCTCACCATCAGCAGCCTGGAGTATGAAGATATGGGAATTTATTATTGTCTACAGTATGATGAGTTTCCGCTCACGTTCGGTGCTGGGACCAAGCTGGAGCTGAAAC
				6	IGKV14-111*01	IGKJ5*01	99.6	\	Yes	TTCCATGTATGCATCTCTAGGAGAGAGAGTCACTATCACTTGCAAGGCGAGTCAGGACATTAATAGCTATTTAAGCTGGTTCCAGCAGAAGCCAGGGAAATCTCCTAAGACCCTGATCTATCGTGCAAACAGATTGGTAGATGGGGTCCCATCAAGGTTCAGTGGCAGTGGATCTGGGCAAGATTATTCTCTCACCATCAGCAGCCTGGAGTATGAAGATATGGGAATTTATTATTGTCTACAGTATGATGAGTTTCCGCTCACGTTCGGTGCTGGGACCAAGCTGGAGCTGAAAC
				7	IGKV12-46*01	IGKJ1*01	98.9	\	Yes	AGCCTCCCTATCGGTATCTGTGGGAGAAACTGTCACCATCACATGTCGAGCAAGTGAGAATATTTACAGTAATTTAGCATGGTATCAGCAGAAACAGGGAAAATCTCCTCAGCTCCCGGTCTATGCTGCAACAAACTTAGCAGATGGTGTGCCATCAAGGTTCAGTGGCAGTGGATCAGGCACACAGTGTTCCCTCAAGATCAACAGCCTGCAGTCTGAAGATTTTGGGAGTTATTACTGTCAACATTTTTGGGGTACTCCTCCGACGTTCGGTGGAGGCACCAAGCTGGAAATCAAAC
				8	IGKV12-46*01	IGKJ1*01	99.2	\	Yes	CGCCTCCCTATCGGTATCTGTGGGAGAAACTGTCACCATCACATGTCGAGCAAGTGAGAATATTTACAGTAATTTAGCATGGTATCAGCAGAAACAGGGAAAATCTCCTCAGCTCCCGGTCTATGCTGCAACAAACTTAGCAGATGGTGTGCCATCAAGGTTCAGTGGCAGTGGATCAGGCACACAGTATTCCCTCAAGATCAACAGCCTGCAGTCTGAAGATTTTGGGAGTTATTACTGTCAACATTTTTGGGGTACTCCTCCGACGTTCGGTGGAGGCACCAAGCTGGAAATCAAAC
				9	IGKV12-46*01	IGKJ1*01	99.6	\	Yes	AGCCTCCCTATCGGTATCTGTGGGAGAAACTGTCACCATCACATGTCGAGCAAGTGAGAATATTTACAGTAATTTAGCATGGTATCAGCAGAAACAGGGAAAATCTCCTCAGCTCCTGGTCTATGCTGCAACAAACTTAGCAGATGGTGTGCCATCAAGGTTCAGTGGCAGTGGATCAGGCACACAGTATTCCCTCAAGATCAACAGCCTGCAGTCTGAAGATTTTGGGAGTTATTACTGTCAACATTTTTGGGGTACTCCTCCGACGTTCGGTGGAGACACCAAGCTGGAAATCAAAC
				10	IGKV12-46*01	IGKJ1*01	99.2	\	Yes	AGCCTCCCTATCGGTATCTGTGGGAGAAACTGTCACCATCACATGTCGAGCAAGTGAGAATATTTACAGTAATTTAGCATGGTATCAGCAGAAACAGGGAAAATCTCCTCAGCTCCCGGTCTATGCTGCAACAAACTTAGCAGATGGTGTGCCATCAAGGTTCAGTGGCAGTGGATCAGGCACACAGTATTCCCTCAAGATCAACAGCCTGCAGTCTGAAGATTTTGGGAGTTATTACTGTCAACATTTTTGGGGTACTCCTCCGACGTTCGGTGGAGGCACCAAGCTGGAAATCAAAC
			6	1	IGKV14-126*01	IGKJ1*01	99.6	\	Yes	CTCCATGTATGCATCGCTGGGAGAGAGAGTCACTATCACTTGCAAGGCGAGTCAGGACATTAAAAGCTATTTAAGCTGGTACCAGCAGAAACCGTGGAAATCTCCTAAGACCCTGATCTATTATGCAACAAGCTTGGCAGATGGGGTCCCATCAAGATTCAGTGGCAGTGGATCTGGGCAAGATTATTCTCTAACCATCAGCAGCCTGGAGTCTGACGATACAGCAACTTATTACTGTCTACAGCATGGTGAGAGCCCGTGGACGTTCGGTGGAGGCACCAAGCTGGAAATCAAAC
				2	IGKV17-127*01	IGKJ2*01	100	\	Yes	AGCATCCCTGTCCGTGGCTACAGGAGAAAAAGTCACTATCAGATGCATAACCAGCACTGATATTGATGATGATATGAACTGGTACCAGCAGAAGCCAGGGGAACCTCCTAAGCTCCTTATTTCAGAAGGCAATACTCTTCGTCCTGGAGTCCCATCCCGATTCTCCAGCAGTGGCTATGGCACAGATTTTGTTTTTACAATTGAAAACACGCTCTCAGAAGATGTTGCAGATTACTACTGTTTGCAAAGTGATAACATGCCGTACACGTTCGGAGGGGGGACCAAGCTGGAAATAAAAC
				3	IGKV14-126*01	IGKJ2*01	98.4	\	Yes	CTCCATGTGTGCATCGCTGGGAGAGAGAGTCACTATCACTTGCAAGGCGAGTCAAGACATTAAAAGCTATTTAAGCTGGTACCAGCAGAAACCATGGAAATCTCCTAAGACCCTGATCTATTATGCAACAAGCTTGGCAGATGGGGTCCCATCAAGATTCAGCGGCAGTGGATCTGGGCAAGATTATTCTCTAACCATCAGCAGCCTGGAGTCTGACGATACGGCAACTTATTACTGTCTACAGCATGGTGAGAGCCCGTACACGTTCGGAGGGGGGACCAAGCTGGAAATAAAAC
				4	IGKV19-93*01	IGKJ2*01	99.2	\	Yes	ATCCTCACTGTCTGCATCTCTGGGAGGCAAAGTCACCATCACTTGCAAGGCAAGCCAAGACATTAACAAGTATATAGCTTGGTCCCAACACAAGCCTGGAAAAGGTCCTAGGCTGCTCATACATTACACATCTACATTACAGCCAGGCATCCCATCAAGGTTCAGTGGAAGTGGGTCCGGGAGAGATTATTCCTTCAGCATCAGCAACCTGGAGCCTGAAGATATTGCAACTTATTATTGTCTACAGTATGATAATCTGTACACGTTCGGAGGGGGGGCCAAGCTGGAAATAAAAC
				5	IGKV14-126*01	IGKJ1*01	99.2	\	Yes	CTCCATGTATGCATCGCTGGGAGAGAGAGTCACTATCACTTGCAAGACGAGTCAGGACATTAAAAGCTATTTAAGCTGGTACCAGCAGAAACCGTGGAAATCTCCTAAGACCCTGATCTATTATGCAACAAGCTTGGCAGATGGGGTCCCATCAAGATTCAGTGGCAGTGGATCTGGGCAAGATTATTCTCTAACCATCAGCAGCCTGGAGTCTGACGATACAGCAACTTATTACTGTCTACAGCATGGTGAGAGCCCGTGGACGCTCGGTGGAGGCACCAAGCTGGAAATCAAAC
				6	IGKV14-126*01	IGKJ1*01	99.6	\	Yes	CTCCATGTATGCATCGCTGGGAGAGAGAGTCACTATCACTTGCAAGGCGAGTCAGGACATTAAAAGCTATTTAAGCTGGTACCAGCAGAAACCGTGGAAATCTCCTAAGACCCTGATCTATTATGCAACAAGCTTGGCAGATGGGGTCCCATCAAGATTCAGTGGCAGTGGATCTGGGCAAGATTATTCTCTAACCATCAGCAGCCTGGAGTCTGACGATACAGCAACTTATTACTGTCTACAGCATGGTGAGAGCCCGTGGACGTTCGGTGGAGGCACCAAGCTGGAAATCAAAC
				7	IGKV14-111*01	IGKJ2*01	96.4	AGCCC	Yes	TTCCATGTATGCATCTCTAGGAGAGAGAGTCACTATCACTTGCAAGGCGAGTCAGGACATTAATAGCTATTTAAGCTGGTTCCAGCAGAAACCAGGGAAATCTCCTAAGACCCTGATCTATCGTGCAAACAGATTGGTAGATGGGGTCCCATCAAGGTTCAGTGGCAGTGGATCTGGGCAAGATTATTCTCTAACCATCAGCAGCCTGGAGTCTGACGATACGGCAACTTATTACTGTCTACAGCATGGTGAGAGCCCGTACACGTTCGGAGGGGGGACCAAGCTGGAAATAAAAC
				8	IGKV14-126*01	IGKJ1*01	99.6	\	Yes	CTCCATGTATGCATCGCTGGGAGAGAGAGTCACTATCACTTGCAAGGCGAGTCAGGACATTAAAAGCTATTTAAGCTGGTACCAGCAGAAACCGTGGAAATCTCCTAAGACCCTGATCTATTATGCAACAAGCTTGGCAGATGGGGTCCCATCAAGATTCAGTGGCAGTGGATCTGGGCAAGATTATTCTCTAACCATCAGCAGCCTGGAGTCTGACGATACAGCAACTTATTACTGTCTACAGCATGGTGAGAGCCCGTGGACGTTCGGTGGAGGCACCAAGCTGGAAATCAAAC
				9	IGKV14-126*01	IGKJ2*01	98.1	\	Yes	CTCCATGTATGCATCGCTGGGAGAGAGAGTCACTATCACTTGCAAGGCGAGTCAAGACATTAAAAGCCATTTAAGCTGGTACCAGCAGAAACCATGGAAATCTCCTAAGATCCTGATCTATTATGCAACAAGCTTGGCAGATGGGGTCCCATCAAGATTCAGTGGCAGTGGATCTGGGCAAGATTATTCTCTGACCATCAGCAGCCTGGAGTCTGACGATACGGCAACTTATTACTGTCTACAGCATGGTGAGAGCCCGTACACGTTCGGAGGGGGGACCAAGCTGGAAATAAAAC
				10	IGKV19-93*01	IGKJ2*01	100	\	Yes	ATCCTCACTGTCTGCATCTCTGGGAGGCAAAGTCACCATCACTTGCAAGGCAAGCCAAGACATTAACAAGTATATAGCTTGGTACCAACACAAGCCTGGAAAAGGTCCTAGGCTGCTCATACATTACACATCTACATTACAGCCAGGCATCCCATCAAGGTTCAGTGGAAGTGGGTCTGGGAGAGATTATTCCTTCAGCATCAGCAACCTGGAGCCTGAAGATATTGCAACTTATTATTGTCTACAGTATGATAATCTGTACACGTTCGGAGGGGGGACCAAGCTGGAAATAAAAC
				11	IGKV19-93*01	IGKJ2*01	100	\	Yes	ATCCTCACTGTCTGCATCTCTGGGAGGCAAAGTCACCATCACTTGCAAGGCAAGCCAAGACATTAACAAGTATATAGCTTGGTACCAACACAAGCCTGGAAAAGGTCCTAGGCTGCTCATACATTACACATCTACATTACAGCCAGGCATCCCATCAAGGTTCAGTGGAAGTGGGTCTGGGAGAGATTATTCCTTCAGCATCAGCAACCTGGAGCCTGAAGATATTGCAACTTATTATTGTCTACAGTATGATAATCTGTACACGTTCGGAGGGGGGACCAAGCTGGAAATAAAAC
				12	IGKV14-126*01	IGKJ1*01	98.5	\	Yes	ATCCTCCATGTATGCATCGCTGGGAGAGAGAGTCACTATCACTTGCAAGGCGAGTCAAGACATTAAAAGCTATTTAAGCTGGTACCGGCAGAAGCCGTGGAAATCTCCTAAGACCCTGATCTATTATGCAACAAGCTTGGCAGATGGGGTCCCATCAAGATTCAGTGGCAGTGGATCTGGGCAAGATTATTCTCTAACCATCAGCAGCCTGGAGTCTGACGATACAGCAACTTATTACTGTCTACAGCATGGTGAGAGCCCGTGGACGTTCGGTGGAGGCACCAAGCTGGAAATCAAAC
				13	IGKV14-126*01	IGKJ1*01	98.9	\	Yes	ATCCTCCATGTATGCATCGCTGGGAGAGAGAGTCACTATCACTTGCAAGGCGAGCCAAGACATTAAAAGCTATTTAAGCTGGTACCAGCAGAAACCATGGAAATCTCCTAAGACCCTGATCTATTATGCAACAAGCTTGGCAGATGGGGTCCCATCAAGATTCAGTGGCAGTGGATCTGGGCAAGATTATTCTCTAACCATCAGCAGCCTGGAGTCTGACGATACGGCAACTTATTACTGTCTACAGCATGGTGAGAGCCCGTACACGTTCGGAGGGGGGACCAAGCTGGAAATAAAAC
				14	IGKV14-126*01	IGKJ1*01	98.9	\	Yes	ATCCTCCATGTATGCATCGCTGGGAGAGAGAGTCACTATCACTTGCAAGGCGAGTCAGGACATTAAAAGCTATTTAAGCTGGTACCAGCAGAAACCGTGGAAATCTCCTAAGACCCTGATCTATTATGCAACAAGCTTGGCAGATGGGGTCCCATCAAGATTCAGTGGCAGTGGGTCTGGGCAAGATTATTCTCTAACCATCGGCAGCCTGGAGTCTGACGATACAGCAACTTATTACTGTCTACAGCATGGTGAGAGCCCGTGGACGTTCGGTGGAGGCACCAAGCTGGAAATCAAAC
		WT-2	1	1	IGKV17-121*01	IGKJ2*01	100	ACA	Yes	AGCATCCCTGTCCATGGCTATAGGAGAAAAAGTCACCATCAGATGCATAACCAGCACTGATATTGATGATGATATGAACTGGTACCAGCAGAAGCCAGGGGAACCTCCTAAGCTCCTTATTTCAGAAGGCAATACTCTTCGTCCTGGAGTCCCATCCCGATTCTCCAGCAGTGGCTATGGTACAGATTTTGTTTTTACAATTGAAAACATGCTCTCAGAAGATGTTGCAGATTACTACTGTTTGCAAAGTGATAACTTGCCTCACATGTACACGTTCGGAGGGGGGACCAAGCTGGAAATAAAAC
				2	IGKV17-121*01	IGKJ2*01	99.6	ACA	Yes	GCATCCCTGTCCATGGCTATAGGAGAAAAAGTCACCATCAGATGCATAACCAGCACTGATATTGATGATGATATGAACTGGTACCAGCAGAAGCCAGGGGAACCTCCTAAGCTCCTTATTTCAGAAGGCAATACTCTTCGTCCTGGAGTCCCATCCCGATTCTCCAGCAGTGGCTATGGTACAGATTTTGTTTTTACAATTGAAAACATGCTCTCAGAAGATGCTGCAGATTACTACTGTTTGCAAAGTGATAACTTGCCTCACATGTACACGTTCGGAGGGGGGACCAAGCTGGAGATAAAAC
				3	IGKV17-121*01	IGKJ2*01	100	ACA	Yes	AGCATCCCTGTCCATGGCTATAGGAGAAAAAGTCACCATCAGATGCATAACCAGCACTGATATTGATGATGATATGAACTGGTACCAGCAGAAGCCAGGGGAACCTCCTAAGCTCCTTATTTCAGAAGGCAATACTCTTCGTCCTGGAGTCCCATCCCGATTCTCCAGCAGTGGCTATGGTACAGATTTTGTTTTTACAATTGAAAACATGCTCTCAGAAGATGTTGCAGATTACTACTGTTTGCAAAGTGATAACTTGCCTCACATGTACACGTTCGGAGGGGGGACCAAGCTGGAAATAAAAC
				4	IGKV17-121*01	IGKJ2*01	99.2	ACA	Yes	AGCATCCCTGTCCATGGCTATAGGAGAAAAAGTCACCATCAGATGCACAACCAGCACCGATATTGATGATGATATGAACTGGTACCAGCAGAAGCCAGGGGAACCTCCTAAGCTCCTTATTTCAGAAGGCAATACTCTTCGTCCTGGAGTCCCATCCCGATTCTCCAGCAGTGGCTATGGTACAGATTTTGTTTTTACAATTGAAAACATGCTCTCAGAAGATGTTGCAGATTACTACTGTTTGCAAAGTGATAACTTGCCTCACATGTACACGTTCGGAGGGGGGACCAAGCTGGAAATAAAAC
				5	IGKV17-121*01	IGKJ2*01	98.9	ACA	Yes	AGCATCCCGGTCCATGGCTATAGGAGAAAAAGTCACCATCAGATGCATAACCAGCACTGATATTGATGATGATATGAACTGGTACCAGCAGAAGCCAGGGGAACCTCCTAAGCTCCTTATTTCAGAAGGCAATACTCTTCGTCCTGGAGTCCCATCCCGATTCTCCAGCAGTGGCTATGGTACAGATTTTGTTTTTACAATTGAAAACATGCTCTCAGAAGATGGTGCGGATTACTACTGTTTGCAAAGTGATAACTTGCCTCACATGTACACGTTCGGAGGGGGGACCAAGCTGGAAATAAAAC
				6	IGKV17-121*01	IGKJ2*01	99.2	ACA	Yes	AGCATCCCTGTCCATGGCTATAGGAGAAAAAGTCACCATCAGATGCATAACCAGCACTGATATTGATGATGATATGAACTGGTACCAGCAGAAGCCAGGGGAACCTCCTAAGCTCCTTATTTCAGAAGGCAATACCCTTCGTCCTGGAGTCCCATCCCGATTCTCCAGCAGTGGCTATGGTACAGATTTTGTTTTTACAATTGAAAACATGCTCTCAGAAGATGTTGCAGATTACTACTGTTTGCAAAGTGGTAACTTGCCTCACATGTACACGTTCGGAGGGGGGACCAAGCTGGAAATAAAAC
				7	IGKV17-121*01	IGKJ2*01	100	ACA	Yes	AGCATCCCTGTCCATGGCTATAGGAGAAAAAGTCACCATCAGATGCATAACCAGCACTGATATTGATGATGATATGAACTGGTACCAGCAGAAGCCAGGGGAACCTCCTAAGCTCCTTATTTCAGAAGGCAATACTCTTCGTCCTGGAGTCCCATCCCGATTCTCCAGCAGTGGCTATGGTACAGATTTTGTTTTTACAATTGAAAACATGCTCTCAGAAGATGTTGCAGATTACTACTGTTTGCAAAGTGATAACTTGCCTCACATGTACACGTTCGGAGGGGGGACCAAGCTGGAAATAAAAC
				8	IGKV17-121*01	IGKJ2*01	100	ACA	Yes	AGCATCCCTGTCCATGGCTATAGGAGAAAAAGTCACCATCAGATGCATAACCAGCACTGATATTGATGATGATATGAACTGGTACCAGCAGAAGCCAGGGGAACCTCCTAAGCTCCTTATTTCAGAAGGCAATACTCTTCGTCCTGGAGTCCCATCCCGATTCTCCAGCAGTGGCTATGGTACAGATTTTGTTTTTACAATTGAAAACATGCTCTCAGAAGATGTTGCAGATTACTACTGTTTGCAAAGTGATAACTTGCCTCACATGTACACGTTCGGAGGGGGGACCAAGCTGGAAATAAAAC
			2	1	IGKV17-121*01	IGKJ5*01	97.7	\	Yes	GCATCCCTGTCCATGGCTATAGGAGAAAAAGTCACCATCAGATGCATAACCAGCACTGATATCGATGATGATATGAACTGGTACCAGCAGAAGCCAGGGGAACCTCCTAAGCTCCTTATTTCAGAAGGCAATACTCTTCGTCCTGGAGTCCCATCCCGATTCTCCAGCAGTGGCTATGGCACAGATTTTGTTTTTACAATTGAAAACACGCTCTCAGAAGATGTTGCAGATTACTACTGTTTACAAAGTGATAACATGCCCCTCACGTTCGGTGCTGGGACCAAGCTGGAGCTGAAAC
				2	IGKV17-121*01	IGKJ5*01	97.7	\	Yes	AGCATCCCTGTCCATGGCTATAGGAGAAAAAGTCACCATCAGATGCATAACCAGCACTGATATTGGTGATGATATGAACTGGTACCAGCAGAAGCCAGGGGAACCCCCTAAGCTCCTTATTTCAGAAGGCAATACTCTTCGTCCTGGAGTCCCATCCCGATTCTCCAGCAGTGGCTATGGCACAGATTTTGTTTTTACAATTGAAAACACGCTCTCAGAAGATGTTGCAGATTACTACTGTTTACAAAGTGATAACATGCCTCTCACGTTCGGTGCTGGGACCAAGCTGGAGCTGAAAC
				3	IGKV17-127*01	IGKJ5*01	99.2	CG	Yes	TATAGGAGAAAAAGTCACCATCAGATGCATAACCAGCACTGATATTGATGATGATATGAACTGGTACCAGCAGAAGCCAGGGGAACCTCCTAAGCTCCTTATTTCAGAAGGCAATACTCTTCGTCCTGGAGTCCCATCCCGATTCTCCAGCAGTGGCTATGGCACAGATTTTGTTTTTACAATTGAAAACACGCTCTCAGAAGATGTTGCAGATTACTACTGTTTGCAAAGTGATAACATGCCTCTCGCGTTCGGTGCTGGGACCAAGCTGGAGCTGAAAC
				4	IGKV17-121*01	IGKJ5*01	98.9	\	Yes	AGCATCCCTGTCCATGGCTATAGGAGAAAAAGTCACCATCAGATGCATAACCAGCACTGATATTGATGATGATATGAACTGGTACCAGCAGAAGCCAGGGGAACCTCCTAAGCTCCTTATTTCAGAAGGCAATACTCTTCGTCCTGGAGTCCCATCCCGATTCTCCAGCAGTGGCTATGGCACAGATTTTGTTTTTACAATTGAAAACACGCTCTCAGAAGATGTTGCAGATTACTACTGTTTGCAAAGTGATAACATGCCTCTCACGTTCGGTGCTGGGACCAAGCTGGAGCTGAAAC
			3	1	IGKV9-120*01	IGKJ2*01	98.8	\	Yes	CCTTATCTGCCTCTCTGGGAGAAAGAGTCAGTCTCACTTGTCGGGCAAGTCAGGACATTGGTAGTAGCTTAAACTGGCGTCAGCAGGAACCAGATGAAACTATTAAACGCCTGATCTACGCCACATCCAGTTTAGATTCTGGTGTCCCCAAAAGGTTCAGTGGCAGTAGGTCTGGGTCAGATTATTCTCTCACCATCAGCAGCCTTGAGTCTGAAGATTTTGTAGACTATTACTGTCTACAATATGCTAGTTCTCCGTACACGTTCGGAGGGGGGACCAAGCTGGAAATAAAAC
				2	IGKV9-120*01	IGKJ2*01	99.2	\	Yes	CCTTATCTGCCTCTCTGGGAGAAAGAGTCAGTCTCACTTGTCGGGCAAGTCAGGACATTGGTAGTAGCTTAAACTGGCGTCAGCAGGAACCAGATGGAACTATTAAACGCCTGATCTACGCCACATCCAGTTTAGATTCTGGTGTCCCCAAAAGGTTCAGTGGCAGTAGGTCTGGGTCAGATTATTCTCTCACCATCAGCAGCCTTGAGTCTGAAGATTTTGTAGACTATTACTGTCTACAATATGCTAGTTCTCCGTACACGTTCGGAGGGGGGACCAAGTTGGAAATAAAAC
				3	IGKV9-120*01	IGKJ2*01	98.8	\	Yes	CCTTATCTGCCTCTCTGGGAGAAAGAGTCAGTCTCACTTGTCGGGCAAGTCAGGACATTGGTAGTAGCTTAAACTGGCGTCAGCAGGAACCAGATGAAACTATTAAACGCCTGATCTACGCCACATCCAGTTTAGATTCTGGTGTCCCCAAAAGGTTCAGTGGCAGTAGGTCTGGGTCAGATTATTCTCTCACCATCAGCAGCCTTGAGTCTGAAGATTTTGTAGACTATTACTGTCTACAATATGCTAGTTCTCCGTACACGTTCGGAGGGGGGACCAAGCTGGAAATAAAAC
				4	IGKV9-120*01	IGKJ2*01	98	\	Yes	CCTTATCTGCCTCTCTGGGAGAAAGAGTCAGTCTCGCTTGTCGGGCAAGTCAGGACATTGGTAGTAGCTTAAACTGGCGTCAGCAGGAACCAGATGAAACTATTAAACGCCTGATCTACGCCACATCCAGTTTAGATTCTGGTGTCCCCAAAAGGTTCAGTGGCAGTAGGTCTGGGTCAGATTATTCTCTCACCATCAGCAGCCTTGAGTCTGAAGATTTTGTAGACTATTACTGTCTACAATATGCTAATTCTCCGTACACGTTCGGAGGGGGGACCAAGCTGGAAATAAAAC
				5	IGKV9-120*01	IGKJ2*01	97.7	\	Yes	CCTTATCTGCCTCTCTGGGAGAAAGAGTCAGTCTCGCTTGTCAGGCAAGTCAGGACATTGGTAGTAGCTTAAACTGGCGTCAGCAGGAACCAGATGAAACTATTAAACGCCTGATCTACGCCACATCCAGTTTAGATTCTGGTGTCCCCAAAAGGTTCAGTGGCAGTAGGTCTGGGTCAGATTATTCTCTCACCATCAGCAGCCTTGAGTCCGAAGATTTTGTAGACTATTACTGTCTACAATATGCTAGTTCTCCGTACACGTTCGGAGGGGGGACCAAGCTGGAAATAAAAC
				6	IGKV9-120*01	IGKJ2*01	97.7	\	Yes	CCTTATCTGCCTCTCTGGGAGAAAGAGTCAGTCTCGCTTGTCAGGCAAGTCAGGACATTGGTAGTAGCTTAAACTGGCGTCAGCAGGAACCAGATGAAACTATTAAACGCCTGATCTACGCCACATCCAGTTTAGATTCTGGTGTCCCCAAAAGGTTCAGTGGCAGTAGGTCTGGGTCAGATTATTCTCTCACCATCAGCAGCCTTGAGTCCGAAGATTTTGTAGACTATTACTGTCTACAATATGCTAGTTCTCCGTACACGTTCGGAGGGGGGACCAAGCTGGAAATAAAAC
				7	IGKV17-121*01	IGKJ2*01	99.6	\	Yes	CCAGCATCCCTGTCCATGGCTATAGGAGAAAAAGTCACCATCAGATGCATAACCAGCACTGGTATTGATGATGATATGAACTGGTACCAGCAGAAGCCAGGGGAACCTCCTAAGCTCCTTATTTCAGAAGGCAATACTCTTCGTCCTGGAGTCCCATCCCGATTCTCCAGCAGTGGCTATGGTACAGATTTTGTTTTTACAATTGAAAACATGCTCTCAGAAGATGTTGCAGATTACTACTGTTTGCAAAGTGATAACTTGCCGTACACGTTCGGAGGGGGGACCAAGCTGGAAATAAAAC
				8	IGKV9-120*01	IGKJ2*01	97.7	\	Yes	CCTTATCTGCCTCTCTGGGAGAAAGAGTCAGTCTCGCTTGTCAGGCAAGTCAGGACATTGGTAGTAGCTTAAACTGGCGTCAGCAGGAACCAGATGAAACTATTAAACGCCTGATCTACGCCACATCCAGTTTAGATTCTGGTGTCCCCAAAAGGTTCAGTGGCAGTAGGTCTGGGTCAGATTATTCTCTCACCATCAGCAGCCTTGAGTCCGAAGATTTTGTAGACTATTACTGTCTACAATATGCTAGTTCTCCGTACACGTTCGGAGGGGGGACCAAGCTGGAAATAAAAC
			4	1	IGKV14-100*01	IGKJ1*01	99.2	\	Yes	CTCCATGTCTGTATCTCTGGGAGACACAGTCAGCATCACTTGCCATGCAAGTCAGGGCATTAGCAATAATATAGGGTGGTTGCAGCAGAAACCAGGGAAATCTTTTAAGGGCCTGATCTATCATGGAACCAACTTGGAAGATGGAGTTCCATCAAGGTTCAGTGGCAGTGGATCTGGAGCAGATTATTCTCTCACCATCAGCAGCCTGGAATCTGAAGATTTTGCAGACTATTACTGTGTACAGTATGCTCAGTTTCCTCGGACGTTCGGTGGAGGCACCAAGCTGGAAATCAAAC
				2	IGKV14-100*01	IGKJ1*01	99.2	\	Yes	CTCCATGTCTGTATCTCTGGGAGACACAGTCAGCATCACTTGCCATGCAAGTCAGGGCATTAGCAATAATATAGGGTGGTTGCAGCAGAAACCAGGGAAATCTTTTAAGGGCCTGATCTATCATGGAACCAACTTGGAAGATGGAGTTCCATCAAGGTTCAGTGGCAGTGGATCTGGAGCAGATTATTCTCTCACCATCAGCAGCCTGGAATCTGAAGATTTTGCAGACTATTACTGTGTACAGTATGCTCAGTTTCCTCGGACGTTCGGTGGAGGCACCAAGCTGGAAATCAAAC
				3	IGKV17-121*01	IGKJ2*01	100	ACA	Yes	ATCCCTGTCCATGGCTATAGGAGAAAAAGTCACCATCAGATGCATAACCAGCACTGATATTGATGATGATATGAACTGGTACCAGCAGAAGCCAGGGGAACCTCCTAAGCTCCTTATTTCAGAAGGCAATACTCTTCGTCCTGGAGTCCCATCCCGATTCTCCAGCAGTGGCTATGGTACAGATTTTGTTTTTACAATTGAAAACATGCTCTCAGAAGATGTTGCAGATTACTACTGTTTGCAAAGTGATAACTTGCCTCACATGTACACGTTCGGAGGGGGGACCAAGCTGGAAATAAAAC
				4	IGKV14-100*01	IGKJ1*01	99.2	\	Yes	CTCCATGTCTGTATCTCTGGGAGACACAGTCAGCATCACTTGCCATGCAAGTCAGGGCATTAGCAATAATATAGGGTGGTTGCAGCAGAAACCAGGGAAATCTTTTAAGGGCCTGATCTATCATGGAACCAACTTGGAAGATGGAGTTCCATCAAGGTTCAGTGGCAGTGGATCTGGAGCAGATTATTCTCTCACCATCAGCAGCCTGGAATCTGAAGATTTTGCAGACTATTACTGTGTACAGTATGCTCAGTTTCCTCGGACGTTCGGTGGAGGCACCAAGCTGGAAATCAAAC
				5	IGKV14-100*01	IGKJ1*01	99.2	\	Yes	CTCCATGTCTGTATCTCTGGGAGACACAGTCAGCATCACTTGCCATGCAAGTCAGGGCATTAGCAATAATATAGGGTGGTTGCAGCAGAAACCAGGGAAATCTTTTAAGGGCCTGATCTATCATGGAACCAACTTGGAAGATGGAGTTCCATCAAGGTTCAGTGGCAGTGGATCTGGAGCAGATTATTCTCTCACCATCAGCAGCCTGGAATCTGAAGATTTTGCAGACTATTACTGTGTACAGTATGCTCAGTTTCCTCGGACGTTCGGTGGAGGCACCAAGCTGGAAATCAAAC
				6	IGKV14-100*01	IGKJ1*01	99.2	\	Yes	CTCCATGTCTGTATCTCTGGGAGACACAGTCAGCATCACTTGCCATGCAAGTCAGGGCATTAGCAATAATATAGGGTGGTTGCAGCAGAAACCAGGGAAATCTTTTAAGGGCCTGATCTATCATGGAACCAACTTGGAAGATGGAGTTCCATCAAGGTTCAGTGGCAGTGGATCTGGAGCAGATTATTCTCTCACCATCAGCAGCCTGGAATCTGAAGATTTTGCAGACTATTACTGTGTACAGTATGCTCAGTTTCCTCGGACGTTCGGTGGAGGCACCAAGCTGGAAATCAAAC
				7	IGKV14-100*01	IGKJ1*01	99.2	\	Yes	CTCCATGTCTGTATCTCTGGGAGACACAGTCAGCATCACTTGCCATGCAAGTCAGGGCATTAGCAATAATATAGGGTGGTTGCAGCAGAAACCAGGGAAATCTTTTAAGGGCCTGATCTATCATGGAACCAACTTGGAAGATGGAGTTCCATCAAGGTTCAGTGGCAGTGGATCTGGAGCAGATTATTCTCTCACCATCAGCAGCCTGGAATCTGAAGATTTTGCAGACTATTACTGTGTACAGTATGCTCAGTTTCCTCGGACGTTCGGTGGAGGCACCAAGCTGGAAATCAAAC
				8	IGKV14-100*01	IGKJ1*01	99.2	\	Yes	ATCCTCCATGTCTGTATCTCTGGGAGACACAGTCAGCATCACTTGCCATGCAAGTCAGGGCATTAGCAATAATATAGGGTGGTTGCAGCAGAAACCAGGGAAATCTTTTAAGGGCCTGATCTATCATGGAACCAACTTGGAAGATGGAGTTCCATCAAGGTTCAGTGGCAGTGGATCTGGAGCAGATTATTCTCTCACCATCAGCAGCCTGGAATCTGAAGATTTTGCAGACTATTACTGTGTACAGTATGCTCAGTTTCCTCGGACGTTCGGTGGAGGCACCAAGCTGGAAATCAAAC
			5	1	IGKV9-120*01	IGKJ2*01	99.2	\	Yes	CCATCCTCCTTATCTGCCTCTCTGGGAGAAAGAGTCAGTCTCACTTGTCAGGCAAGTCAGGACATTGGTAGTAGCTTAAACTGGCTTCAGCAGGAACCAGATGGAACTATTAAACGCCTGATCTACGCCACATCCAGTTTAGATTCTGGTGTCCCCAAAAGGTTCAGTGGCAGTAGGTCTGGGTCAGATTATTCTCTCACCATCAGCAGCCTTGAGTCTGAAGATTTTGTAGACTATTACTGTCTACAATATGCTAGTTCTCCGTACACGTTCGGAGGGGGGACCAAGCTGGAAATAAAAC
				2	IGKV9-120*01	IGKJ2*01	98.9	\	Yes	CCATCCTCCTTATCTGCCTCTCTGGGAGAAAGAGTCAGTCTCACTTGTCAGGCAGGTCAGGACATTGGTAGTAGCTTAAACTGGCTTCAGCAGGAACCAGATGGAACTATTAAACGCCTGATCTACGCCACATCCAGTTTAGATTCTGGTGTCCCCAAAAGGTTCAGTGGCAGTAGGTCTGGGTCAGATTATTCTCTCACCATCAGCAGCCTTGAGTCTGAAGATTTTGTAGACTATTACTGTCTACAATATGCTAGTTCTCCGTACACGTTCGGAGGGGGGACCAAGCTGGAAATAAAAC
				3	IGKV9-120*01	IGKJ2*01	98.9	\	Yes	ATTCAGATGACCCAGTCTCCATCCTCCTTATCTGCCTCTCTGGGAGAAAGAGTCAGTCTCACTTGTCAGGCAAGTCAGGACATTGGTAGTAGCTTAAACTGGCTTCAGCAGGAACCAGATGGAACTATTAAACGCCTGATCTACGCCACATCCAGTTTAGATTCTGGTGTCCCCAAAAGGTTCAGTGGCAGTAGGTCTGGGTCAGATTATTCTCTCACCATCAGCAGCCTTGAGTCTGAAGATTTTGTAGACTATTACTGTCTACAATATGCTAGTTCTCCGTACACGTTCGGAGGGGGGACCAAGCTGGAAATAAAAC
				4	IGKV9-120*01	IGKJ2*01	99.2	\	Yes	CCATCCTCCTTATCTGCCTCTCTGGGAGAAAGAGTCAGTCTCACTTGTCAGGCAAGTCAGGACATTGGTAGTAGCTTAAACTGGCTTCAGCAGGAACCAGATGGAACTATTAAACGCCTGATCTACGCCACATCCAGTTTAGATTCTGGTGTCCCCAAAAGGTTCAGTGGCAGTAGGTCTGGGTCAGATTATTCTCTCACCATCAGCAGCCTTGAGTCTGAAGATTTTGTAGACTATTACTGTCTACAATATGCTAGTTCTCCGTACACGTTCGGAGGGGGGACCAAGCTGGAAATAAAAC
				5	IGKV9-120*01	IGKJ2*01	97.7	\	Yes	CCATCCCCCTTATCTGCCTCTCTGGGGAAAGAGTCAGTCTCACTTGTCAGGCAAGTCAGGACATTGGTAGTAGCTTAAACTGACTTCGGCAGGAACCAGATGGAACTATTAAACGCCTGATCTACGCCACATCCAGTTTAGATTCTGGTGTCCCCAAAAGGTTCAGTGGCAGTAGGTCTGGGTCAGATTATTCTCTCACCATCAGCAGCCTTGAGTCTGAAGATTTTGTAGACTATTACTGTCTACAATATGCTAGTTCTCCGTACACGTTCGGAGGGGGGACCAAGCTGGAAATAAAAC
				6	IGKV9-120*01	IGKJ2*01	98.9	\	Yes	CCATCCTCCTTATCTGCCTCTCTGGGAGAAAGAGTCAGTCCCACTTGTCAGGCAAGTCAGGACATTGGTAGTAGCTTAAACTGGCTTCAGCAGGAACCAGATGGAACTATTAAACGCCTGATCTACGCCACATCCAGTTTAGATTCTGGTGTCCCCAAAAGGTTCAGTGGCAGTAGGTCTGGGTCAGATTATTCTCTCACCATCAGCAGCCTTGAGTCTGAAGATTTTGTAGACTATTACTGTCTACAATATGCTAGTTCTCCGTACACGTTCGGAGGGGGGACCAAGCTGGAAATAAAAC
				7	IGKV9-120*01	IGKJ2*01	99.2	\	Yes	CCATCCTCCTTATCTGCCTCTCTGGGAGAAAGAGTCAGTCTCACTTGTCAGGCAAGTCAGGACATTGGTAGTAGCTTAAACTGGCTTCAGCAGGAACCAGATGGAACTATTAAACGCCTGATCTACGCCACATCCAGTTTAGATTCTGGTGTCCCCAAAAGGTTCAGTGGCAGTAGGTCTGGGTCAGATTATTCTCTCACCATCAGCAGCCTTGAGTCTGAAGATTTTGTAGACTATTACTGTCTACAATATGCTAGTTCTCCGTACACGTTCGGAGGGGGGACCAAGCTGGAAATAAAAC
				8	IGKV9-120*01	IGKJ2*01	99.2	\	Yes	CCATCCTCCTTATCTGCCTCTCTGGGAGAAAGAGTCAGTCTCACTTGTCAGGCAAGTCAGGACATTGGTAGTAGCTTAAACTGGCTTCAGCAGGAACCAGATGGAACTATTAAACGCCTGATCTACGCCACATCCAGTTTAGATTCTGGTGTCCCCAAAAGGTTCAGTGGCAGTAGGTCTGGGTCAGATTATTCTCTCACCATCAGCAGCCTTGAGTCTGAAGATTTTGTAGACTATTACTGTCTACAATATGCTAGTTCTCCGTACACGTTCGGAGGGGGGACCAAGCTGGAAATAAAAC
				9	IGKV9-120*01	IGKJ2*01	99.2	\	Yes	CCATCCTCCTTATCTGCCTCTCTGGGAGAAAGAGTCAGTCTCACTTGTCAGGCAAGTCAGGACATTGGTAGTAGCTTAAACTGGCTTCAGCAGGAACCAGATGGAACTATTAAACGCCTGATCTACGCCACATCCAGTTTAGATTCTGGTGTCCCCAAAAGGTTCAGTGGCAGTAGGTCTGGGTCAGATTATTCTCTCACCATCAGCAGCCTTGAGTCTGAAGATTTTGTAGACTATTACTGTCTACAATATGCTAGTTCTCCGTACACGTTCGGAGGGGGGACCAAGCTGGAAATAAAAC
				10	IGKV9-120*01	IGKJ2*01	98.9	\	Yes	CCATCCTCCTTATCTGCCTCTCTGGGAGAAAGAGTCAGTCTCACTTGTCAGGCAAGTCAGGACATTGGTAGTAGCTTAAACTGGCTTCAGCAGGAACCAGATGGAACTATTAAACGCCTGATCTACGCCACATCCAGTTTAGATTCTGGTGTCCCCAAAAGGTTCAGTGGCAGTAGGTCTGGGTCAGATTATTCTCTCACCATCAGCAGCCTTGAGTCTGAAGATTTCGTAGACTATTACTGTCTACAATATGCTAGTTCTCCGTACACGTTCGGAGGGGGGACCAAGCTGGAAATAAAAC
		WT-3	1	1	IGKV4-55*01	IGKJ5*01	97.7	\	Yes	AGCAATCATGTCTGCATCTCCAGGGGAGAAGGTCACCATGACCTGCAGTGCCAGCTCAAGTGTAAGTTACATGTACTGGTACCAGCAGAAGCCAGGATCCTCCCCCAGACTCCTGATTTATGACACATCCAAACTGGCTTCTGGAGTCCCTGCTCGCTTCAGTGGCAGTGGGTCTGGGACCTCTTACTCTCTCACAATCAGCAGCATGGAGGCTGAAGATGCTGCCACTTATTACTGCCAGCAGTGGAGTAGTAACCCACTCACGTTCGGTGCTGGGACCAAGCTGGAGCTGAAAC
				2	IGKV4-55*01	IGKJ5*01	97.7	\	Yes	AGCAATCATGTCTGCATCTCCAGGGGAGAAGGTCACCATGACCTGCAGTGCCAGCTCAAGTGTAAGTTACATGTACTGGTACCAGCAGAAGCCAGGATCCTCCCCCAGACTCCTGATTTATGACACATCCAAACTGGCTTCTGGAGTCCCTGCTCGCTTCAGTGGCAGTGGGTCTGGGACCTCTTACTCTCTCACAATCAGCAGCATGGAGGCTGAAGATGCTGCCACTTATTACTGCCAGCAGTGGAGTAGTAACCCACTCACGTTCGGTGCTGGGACCAAGCTGGAGCTGAAAC
				3	IGKV4-55*01	IGKJ5*01	97.7	\	Yes	AGCAATCATGTCTGCATCTCCAGGGGAGAAGGTCACCATGACCTGCAGTGCCAGCTCAAGTGTAAGTTACATGTACTGGTACCAGCAGAAGCCAGGATCCTCCCCCAGACTCCTGATTTATGACACATCCAAACTGGCTTCTGGAGTCCCTGCTCGCTTCAGTGGCAGTGGGTCTGGGACCTCTTACTCTCTCACAATCAGCAGCATGGAGGCTGAAGATGCTGCCACTTATTACTGCCAGCAGTGGAGTAGTAACCCACTCACGTTCGGTGCTGGGACCAAGCTGGAGCTGAAAC
				4	IGKV4-55*01	IGKJ5*01	97.3	\	Yes	AGCAATCATGTCTGCATCTCCAGGGGAGAAGGTCACCATGACCTGCAGTGCCAGCTCAAGTGTAAGTTACATGTACTGGTACCAGCAGAAGCCAGGATCCTCCCCCAGACTCCTGATTTATGACACATCCAAACTGGTTTCTGGAGTCCCTGCTCGCTTCAGTGGCAGTGGGTCTGGGACCTCTTACTCTCTCACAATCAGCAGCATGGAGGCTGAAGATGCTGCCACTTATTACTGCCAGCAGTGGAGTAGTAACCCACTCACGTTCGGTGCTGGGACCAAGCTGGAGCTGAAAC
				5	IGKV4-55*01	IGKJ5*01	97.7	\	Yes	AGCAATCATGTCTGCATCTCCAGGGGAGAAGGTCACCATGACCTGCAGTGCCAGCTCAAGTGTAAGTTACATGTACTGGTACCAGCAGAAGCCAGGATCCTCCCCCAGACTCCTGATTTATGACACATCCAAACTGGCTTCTGGAGTCCCTGCTCGCTTCAGTGGCAGTGGGTCTGGGACCTCTTACTCTCTCACAATCAGCAGCATGGAGGCTGAAGATGCTGCCACTTATTACTGCCAGCAGTGGAGTAGTAACCCACTCACGTTCGGTGCTGGGACCAAGCTGGAGCTGAAAC
				6	IGKV4-55*01	IGKJ5*01	97.3	\	Yes	AGCAATCATGTCTGCATCTCCAGGGGAGAAGGTCACCATGACCTGCAGTGCCAGCTCAAGTGTAAGTTACATGTACTGGTACCAGCAGAAGCCAGGATCCTCCCCCAGACTCCTGATTTATGACACATCCAAACTGGCTTCTGGAGTCCCTGCTCGCTTCAGTGGCAGTGGGTCTGGGACCTCTTACTCTCTCACAATCAGCAGCATGGAGGCTGAAGATACTGCCACTTATTACTGCCAGCAGTGGAGTAGTAACCCACTCACGTTCGGTGCTGGGACCAAGCTGGAGCTGAAAC
				7	IGKV4-55*01	IGKJ5*01	97.3	\	Yes	AGCAATCATGTCTGCATCTCCAGGGGAGAAGGTCACCATGACCTGCAGTGCCAGCTCAAGTGTAAGTTACATGTACTGGTACCAGCAGAAGCCAGGATCCTCCCCCAGACTCCTGATTTATGACACATCCAAACTGGCTTCTGGAGTCCCTGCTCGCTTCAGTGGCAGTGGGTCTGGGACCTCTTACTCTCTCACAATCAGCAGCATGGAGGCTGAAGATGCTGCCACTTATTACTGCCAGCAGTGGAGTAGCAACCCACTCACGTTCGGTGCTGGGACCAAGCTGGAGCTGAAAC
				8	IGKV4-55*01	IGKJ5*01	97.7	\	Yes	AGCAATCATGTCTGCATCTCCAGGGGAGAAGGTCACCATGACCTGCAGTGCCAGCTCAAGTGTAAGTTACATGTACTGGTACCAGCAGAAGCCAGGATCCTCCCCCAGACTCCTGATTTATGACACATCCAAACTGGCTTCTGGAGTCCCTGCTCGCTTCAGTGGCAGTGGGTCTGGGACCTCTTACTCTCTCACAATCAGCAGCATGGAGGCTGAAGATGCTGCCACTTATTACTGCCAGCAGTGGAGTAGTAACCCACTCACGTTCGGTGCTGGGACCAAGCTGGAGCTGAAAC
				9	IGKV4-55*01	IGKJ5*01	97.7	\	Yes	AGCAATCATGTCTGCATCTCCAGGGGAGAAGGTCACCATGACCTGCAGTGCCAGCTCAAGTGTAAGTTACATGTACTGGTACCAGCAGAAGCCAGGATCCTCCCCCAGACTCCTGATTTATGACACATCCAAACTGGCTTCTGGAGTCCCTGCTCGCTTCAGTGGCAGTGGGTCTGGGACCTCTTACTCTCTCACAATCAGCAGCATGGAGGCTGAAGATGCTGCCACTTATTACTGCCAGCAGTGGAGTAGTAACCCACTCACGTTCGGTGCTGGGACCAAGCTGGAGCTGAAAC
				10	IGKV4-55*01	IGKJ5*01	97.7	\	Yes	AGCAATCATGTCTGCATCTCCAGGGGAGAAGGTCACCATGACCTGCAGTGCCAGCTCAAGTGTAAGTTACATGTACTGGTACCAGCAGAAGCCAGGATCCTCCCCCAGACTCCTGATTTATGACACATCCAAACTGGCTTCTGGAGTCCCTGCTCGCTTCAGTGGCAGTGGGTCTGGGACCTCTTACTCTCTCACAATCAGCAGCATGGAGGCTGAAGATGCTGCCACTTATTACTGCCAGCAGTGGAGTAGTAACCCACTCACGTTCGGTGCTGGGACCAAGCTGGAGCTGAAAC
			2	1	IGKV14-126*01	IGKJ4*01	99.6	\	Yes	CTCCATGTATGCATCACTGGGAGAGAGAGTCACTATCACTTGCAAGGCGAGTCAGGACATTAAAAGCTATTTAAGCTGGTACCAGCAGAAACCATGGAAATCTCCTAAGACCCTGATCTATTATGCAACAAGCTTGGCAGATGGGGTCCCATCAAGATTCAGTGGCAGTGGATCTGGGCAAGATTATTCTCTAACCATCAGCAGCCTGGAGTCTGACGATACAGCAACTTATTACTGTCTACAGCATGGTGAGAGCCCATTCACGTTCGGCTCGGGGACAAAGTTGGAAATAAAAC
				2	IGKV14-126*01	IGKJ4*01	98.8	\	Yes	CTCCATGTATGCATCACTGGGAGAGAGAGTCACTATCACTTGCAAGGCGAGTCAGGACATTAAAAGCTATTTAAGCTGGTACCAGCAGAAACCATGGAAATCTCCTAAGACCCTGATCTATTATGCAACAAGCTTGGCAGATGGGGTCCCATCAAGATTCAGTGGCAGTGGATCTGGGCAAGATTATTCTCTAACCATCAGCAGCCTGGAGTCTGGCGATACAGCAACTTATTACTGTCTACGGCATGGTGAGAGCCCATTCACGTTCGGCTCGGGGACAAAGTTGGAAATAAAAC
				3	IGKV14-126*01	IGKJ4*01	99.2	\	Yes	CTCCATGTATGCATCACTGGGAGAGAGAGTCACTATCACTTGCAAGGCGAGTCAGGACATTAAAAGCTATTTATGCTGGTACCAGCAGAAACCATGGAAATCTCCTAAGACCCTGATCTATTATGCAACAAGCTTGGCAGATGGGGTCCCATCAAGATTCAGTGGCAGTGGATCTGGGCAAGATTATTCTCTAACCATCAGCAGCCTGGAGTCTGACGATACAGCAACTTATTACTGTCTACAGCATGGTGAGAGCCCATTCACGTTCGGCTCGGGGACAAAGTTGGAAATAAAAC
				4	IGKV14-126*01	IGKJ4*01	99.6	\	Yes	CTCCATGTATGCATCGCTGGGAGAGAGAGTCACTATCACTTGCAAGGCGAGTCAGGACATTAAAAGCTATTTAAGCTGGTACCAGCAGAAACCATGGAAATCTCCTAAGACCCTGATCTATTATGCAACAAGCTTGGCAGATGGGGTCCCATCAAGATTCAGTGGCAGTGGATCTGGGCAAGATTACTCTCTAACCATCAGCAGCCTGGAGTCTGACGATACAGCAACTTATTACTGTCTACAGCATGGTGAGAGCCCATTCACGTTCGGCTCGGGGACAAAGTTGGAAATAAAAC
				5	IGKV14-126*01	IGKJ4*01	99.6	\	Yes	CTCCATGTATGCATCGCTGGGAGAGAGAGTCACTATCACTTGCAAGGCGAGTCAGGACATTGAAAGCTATTTAAGCTGGTACCAGCAGAAACCATGGAAATCTCCTAAGACCCTGATCTATTATGCAACAAGCTTGGCAGATGGGGTCCCATCAAGATTCAGTGGCAGTGGATCTGGGCAAGATTATTCTCTAACCATCAGCAGCCTGGAGTCTGACGATACAGCAACTTATTACTGTCTACAGCATGGTGAGAGCCCATTCACGTTCGGCTCGGGGACAAAGTTGGAAATAAAAC
				6	IGKV14-126*01	IGKJ4*01	100	\	Yes	CTCCATGTATGCATCGCTGGGAGAGAGAGTCACTATCACTTGCAAGGCGAGTCAGGACATTAAAAGCTATTTAAGCTGGTACCAGCAGAAACCATGGAAATCTCCTAAGACCCTGATCTATTATGCAACAAGCTTGGCAGATGGGGTCCCATCAAGATTCAGTGGCAGTGGATCTGGGCAAGATTATTCTCTAACCATCAGCAGCCTGGAGTCTGACGATACAGCAACTTATTACTGTCTACAGCATGGTGAGAGCCCATTCACGTTCGGCTCGGGGACAAAGTTGGAAATAAAAC
				7	IGKV14-126*01	IGKJ4*01	99.6	\	Yes	CTCCATGTATGCATCACTGGGAGAGAGAGTCACTATCACTTGCAAGGCGAGTCAGGACATTAAAAGCTATTTAAGCTGGTACCAGCAGAAACCATGGAAATCTCCTAAGACCCTGATCTATTATGCAACAAGCTTGGCAGATGGGGTCCCATCAAGATTCAGTGGCAGTGGATCTGGGCAAGATTATTCTCTAACCATCAGCAGCCTGGAGTCTGACGATACAGCAACTTATTACTGTCTACAGCATGGTGAGAGCCCATTCACGTTCGGCTCGGGGACAAAGTTGGAAATAAAAC
				8	IGKV14-126*01	IGKJ4*01	100	\	Yes	CTCCATGTATGCATCGCTGGGAGAGAGAGTCACTATCACTTGCAAGGCGAGTCAGGACATTAAAAGCTATTTAAGCTGGTACCAGCAGAAACCATGGAAATCTCCTAAGACCCTGATCTATTATGCAACAAGCTTGGCAGATGGGGTCCCATCAAGATTCAGTGGCAGTGGATCTGGGCAAGATTATTCTCTAACCATCAGCAGCCTGGAGTCTGACGATACAGCAACTTATTACTGTCTACAGCATGGTGAGAGCCCATTCACGTTCGGCTCGGGGACAAAGTTGGAAATAAAAC
				9	IGKV14-126*01	IGKJ4*01	100	\	Yes	CTCCATGTATGCATCGCTGGGAGAGAGAGTCACTATCACTTGCAAGGCGAGTCAGGACATTAAAAGCTATTTAAGCTGGTACCAGCAGAAACCATGGAAATCTCCTAAGACCCTGATCTATTATGCAACAAGCTTGGCAGATGGGGTCCCATCAAGATTCAGTGGCAGTGGATCTGGGCAAGATTATTCTCTAACCATCAGCAGCCTGGAGTCTGACGATACAGCAACTTATTACTGTCTACAGCATGGTGAGAGCCCATTCACGTTCGGCTCGGGGACAAAGTTGGAAATAAAAC
				10	IGKV14-126*01	IGKJ4*01	99.6	\	Yes	CTCCATGTATGCATCGCTGGGAGAGAGAGTCACTATCACTTGCAAGGCGAGTCAGGACATTAAAAGCTATTTAAGCTGGTACCAGCAGAAACCATGGAAATCTCCTAAGACCCTGATCTATTATGCAACAAGCTTGGCAGATGGGGTCCCGTCAAGATTCAGTGGCAGTGGATCTGGGCAAGATTATTCTCTAACCATCAGCAGCCTGGAGTCTGACGATACAGCAACTTATTACTGTCTACAGCATGGTGAGAGCCCATTCACGTTCGGCTCGGGGACAAAGTTGGAAATAAAAC
		WT-4	1	1	IGKV14-111*01	IGKJ1*01	99.2	\	Yes	TTCCATGTATGCATCTCTAGGAGAGAGAGTCACTATCACTTGCAGGGCGAGTCAGGACATTAATAGCTATTTAAGCTGGTTCCAGCAGAAACCAGGGAAATCTCCTAAGACCCTGATCTATCGTGCAAACAGATTGGTAGATGGGGTCCCATCAAGGTTCAGTGGCAGTGGATCTGGGCAAGATTGTTCTCTCACCATCAGCAGCCTGGAGTATGAAGATATGGGAATTTATTATTGTCTACAGTATGATGAGTTTCCGTGGACGTTCGGTGGAGGCACCAAGCTGGAAATCAAAC
				2	IGKV14-111*01	IGKJ1*01	99.6	\	Yes	TTCCATGTATGCATCTCTAGGAGAGAGAGTCACTATCACTTGCAGGGCGAGTCAGGACATTAATAGCTATTTAAGCTGGTTCCAGCAGAAACCAGGGAAATCTCCTAAGACCCTGATCTATCGTGCAAACAGATTGGTAGATGGGGTCCCATCAAGGTTCAGTGGCAGTGGATCTGGGCAAGATTATTCTCTCACCATCAGCAGCCTGGAGTATGAAGATATGGGAATTTATTATTGTCTACAGTATGATGAGTTTCCGTGGACGTTCGGTGGAGGCACCAAGCTGGAAATCAAAC
				3	IGKV14-111*01	IGKJ1*01	99.6	\	Yes	TTCCATGTATGCATCTCTAGGAGAGAGAGTCACTATCACTTGCAGGGCGAGTCAGGACATTAATAGCTATTTAAGCTGGTTCCAGCAGAAACCAGGGAAATCTCCTAAGACCCTGATCTATCGTGCAAACAGATTGGTAGATGGGGTCCCATCAAGGTTCAGTGGCAGTGGATCTGGGCAAGATTATTCTCTCACCATCAGCAGCCTGGAGTATGAAGATATGGGAATTTATTATTGTCTACAGTATGATGAGTTTCCGTGGACGTTCGGTGGAGGCACCAAGCTGGAAATCAAAC
				4	IGKV14-111*01	IGKJ1*01	99.6	\	Yes	TTCCATGTATGCATCTCTAGGAGAGAGAGTCACTATCACTTGCAGGGCGAGTCAGGACATTAATAGCTATTTAAGCTGGTTCCAGCAGAAACCAGGGAAATCTCCTAAGACCCTGATCTATCGTGCAAACAGATTGGTAGATGGGGTCCCATCAAGGTTCAGTGGCAGTGGATCTGGGCAAGATTATTCTCTCACCATCAGCAGCCTGGAGTATGAAGATATGGGAATTTATTATTGTCTACAGTATGATGAGTTTCCGTGGACGTTCGGTGGAGGCACCAAGCTGGAAATCAAAC
				5	IGKV14-111*01	IGKJ1*01	98.8	\	Yes	TTCCATGTATGCATCTCTAGGAGAGAGAGTCACTATCACTTGCAGGGCGAGTCAGGACATTAATAGCTATTTAAGCTGGTTCCAGCAGAAACCAGGGAAATCTCCTAAGACCCTGATCTATCGTGCAAACAGATTGGTAGATGGGGTCCCATCAAGACTCAGTGGCAGTGGATCTGGGCAAGATTATTCTCTCACCATCAGCAGCCTGGAGTATGAAGATATGGGAATTTATTATTGTCTACAGTATGATGAGTTTCCGTGGACGTTCGGTGGAGGCACCAAGCTGGAAATCAAAC
				6	IGKV14-111*01	IGKJ1*01	99.6	\	Yes	TTCCATGTATGCATCTCTAGGAGAGAGAGTCACTATCACTTGCAGGGCGAGTCAGGACATTAATAGCTATTTAAGCTGGTTCCAGCAGAAACCAGGGAAATCTCCTAAGACCCTGATCTATCGTGCAAACAGATTGGTAGATGGGGTCCCATCAAGGTTCAGTGGCAGTGGATCTGGGCAAGATTATTCTCTCACCATCAGCAGCCTGGAGTATGAAGATATGGGAATTTATTATTGTCTACAGTATGATGAGTTTCCGTGGACGTTCGGTGGAGGCACCAAGCTGGAAATCAAAC
			2	1	IGKV17-121*01	IGKJ2*01	100	ACA	Yes	AGCATCCCTGTCCATGGCTATAGGAGAAAAAGTCACCATCAGATGCATAACCAGCACTGATATTGATGATGATATGAACTGGTACCAGCAGAAGCCAGGGGAACCTCCTAAGCTCCTTATTTCAGAAGGCAATACTCTTCGTCCTGGAGTCCCATCCCGATTCTCCAGCAGTGGCTATGGTACAGATTTTGTTTTTACAATTGAAAACATGCTCTCAGAAGATGTTGCAGATTACTACTGTTTGCAAAGTGATAACTTGCCTCACATGTACACGTTCGGAGGGGGGACCAAGCTGGAAATAAAAC
				2	IGKV17-121*01	IGKJ2*01	100	ACG	Yes	AGCATCCCTGTCCATGGCTATAGGAGAAAAAGTCACCATCAGATGCATAACCAGCACTGATATTGATGATGATATGAACTGGTACCAGCAGAAGCCAGGGGAACCTCCTAAGCTCCTTATTTCAGAAGGCAATACTCTTCGTCCTGGAGTCCCATCCCGATTCTCCAGCAGTGGCTATGGTACAGATTTTGTTTTTACAATTGAAAACATGCTCTCAGAAGATGTTGCAGATTACTACTGTTTGCAAAGTGATAACTTGCCTCACGTGTACACGTTCGGAGGGGGGACCAAGCTGGAAATAAAAC
				3	IGKV17-121*01	IGKJ2*01	100	\	Yes	AGCATCCCTGTCCATGGCTATAGGAGAAAAAGTCACCATCAGATGCATAACCAGCACTGATATTGATGATGATATGAACTGGTACCAGCAGAAGCCAGGGGAACCTCCTAAGCTCCTTATTTCAGAAGGCAATACTCTTCGTCCTGGAGTCCCATCCCGATTCTCCAGCAGTGGCTATGGTACAGATTTTGTTTTTACAATTGAAAACATGCTCTCAGAAGATGTTGCAGATTACTACTGTTTGCAAAGTGATAACTTGCCGTACACGTTCGGAGGGGGGACCAAGCTGGAAATAAAAC
				4	IGKV17-121*01	IGKJ2*01	100	ACA	Yes	AGCATCCCTGTCCATGGCTATAGGAGAAAAAGTCACCATCAGATGCATAACCAGCACTGATATTGATGATGATATGAACTGGTACCAGCAGAAGCCAGGGGAACCTCCTAAGCTCCTTATTTCAGAAGGCAATACTCTTCGTCCTGGAGTCCCATCCCGATTCTCCAGCAGTGGCTATGGTACAGATTTTGTTTTTACAATTGAAAACATGCTCTCAGAAGATGTTGCAGATTACTACTGTTTGCAAAGTGATAACTTGCCTCACATGTACACGTTCGGAGGGGGGACCAAGCTGGAAATAAAAC
				5	IGKV17-121*01	IGKJ2*01	99.6	ACA	Yes	AGCATCCCTGTCCATGGCTATAGGAGAAAAAGTCACCATCAGATGCATAACCAGCACTGATATTGATGATGATATGAACTGGTACCTGCAGAAGCCAGGGGAACCTCCTAAGCTCCTTATTTCAGAAGGCAATACTCTTCGTCCTGGAGTCCCATCCCGATTCTCCAGCAGTGGCTATGGTACAGATTTTGTTTTTACAATTGAAAACATGCTCTCAGAAGATGTTGCAGATTACTACTGTTTGCAAAGTGATAACTTGCCTCACATGTACACGTTCGGAGGGGGGACCAAGCTGGAAATAAAAC
				6	IGKV17-121*01	IGKJ2*01	99.6	ACA	Yes	AGCATCCCTGTCCATGGCTATAGGAGAAAAAGTCACCATCAGATGCATAACCAGCACTGATATTGATGATGATATGAACTGGTACCTGCAGAAGCCAGGGGAACCTCCTAAGCTCCTTATTTCAGAAGGCAATACTCTTCGTCCTGGAGTCCCATCCCGATTCTCCAGCAGTGGCTATGGTACAGATTTTGTTTTTACAATTGAAAACATGCTCTCAGAAGATGTTGCAGATTACTACTGTTTGCAAAGTGATAACTTGCCTCACATGTACACGTTCGGAGGGGGGACCAAGCTGGAAATAAAAC
				7	IGKV17-121*01	IGKJ2*01	99.2	ACA	Yes	AGCATCCCTGCCCATGGCTATAGGAGAAAAAGTCACCATCAGATGCATAACCAGCACTGATATTGATGATGATATGAACTGGTACCAGCAGAAGCCAGGGGAACCTCCTAAGCTCCTTATTTCAGAAGGCAATACTCCTCGTCCTGGAGTCCCATCCCGATTCTCCAGCAGTGGCTATGGTACAGATTTTGTTTTTACAATTGAAAACATGCTCTCAGAAGATGTTGCAGATTACTACTGTTTGCAAAGTGATAACTTGCCTCACATGTACACGTTCGGAGGGGGGACCAAGCTGGAAATAAAAC
				8	IGKV17-121*01	IGKJ2*01	100	\	Yes	AGCATCCCTGTCCATGGCTATAGGAGAAAAAGTCACCATCAGATGCATAACCAGCACTGATATTGATGATGATATGAACTGGTACCAGCAGAAGCCAGGGGAACCTCCTAAGCTCCTTATTTCAGAAGGCAATACTCTTCGTCCTGGAGTCCCATCCCGATTCTCCAGCAGTGGCTATGGTACAGATTTTGTTTTTACAATTGAAAACATGCTCTCAGAAGATGTTGCAGATTACTACTGTTTGCAAAGTGATAACTTGCCGTACACGTTCGGAGGGGGGACCAAGCTGGAAATAAAAC
				9	IGKV17-121*01	IGKJ2*01	100	ACA	Yes	AGCATCCCTGTCCATGGCTATAGGAGAAAAAGTCACCATCAGATGCATAACCAGCACTGATATTGATGATGATATGAACTGGTACCAGCAGAAGCCAGGGGAACCTCCTAAGCTCCTTATTTCAGAAGGCAATACTCTTCGTCCTGGAGTCCCATCCCGATTCTCCAGCAGTGGCTATGGTACAGATTTTGTTTTTACAATTGAAAACATGCTCTCAGAAGATGTTGCAGATTACTACTGTTTGCAAAGTGATAACTTGCCTCACATGTACACGTTCGGAGGGGGGACCAAGCTGGAAATAAAAC
				10	IGKV17-121*01	IGKJ2*01	100	ACA	Yes	AGCATCCCTGTCCATGGCTATAGGAGAAAAAGTCACCATCAGATGCATAACCAGCACTGATATTGATGATGATATGAACTGGTACCAGCAGAAGCCAGGGGAACCTCCTAAGCTCCTTATTTCAGAAGGCAATACTCTTCGTCCTGGAGTCCCATCCCGATTCTCCAGCAGTGGCTATGGTACAGATTTTGTTTTTACAATTGAAAACATGCTCTCAGAAGATGTTGCAGATTACTACTGTTTGCAAAGTGATAACTTGCCTCACATGTACACGTTCGGAGGGGGGACCAAGCTGGAAATAAAAC
			3	1	IGKV17-121*01	IGKJ4*01	99.2	\	Yes	AGCATCCCTGTCCATGGCTATAGGAGAAAAAGTCACCATCAGATGCATAACCAGCACTGATATTGATGATGACATGAACTGGTACCAGCAGAAGCCAGGGGAACCTCCTAAGCTCCTTATTTCAGAAGGCAATACTCTTCGTCCTGGAGTCCCATCCCGATTCTCTAGCAGTGGCTATGGTACAGATTTTGTTTTTACAATTGAAAACATGCTCTCAGAAGATGTTGCAGATTACTACTGTTTGCAAAGTGATAACTTGCCATTCACGTTCAGCTCGGGGACAAAGTTGGAAATAAAAC
				2	IGKV17-121*01	IGKJ4*01	99.6	\	Yes	AGCATCCCTGTCCATGGCTATAGGAGAAAAAGTCACCATCAGATGCATAACCAGCACTGATATTGATGATGACATGAACTGGTACCAGCAGAAGCCAGGGGAACCTCCTAAGCTCCTTATTTCAGAAGGCAATACTCTTCGTCCTGGAGTCCCATCCCGATTCTCCAGCAGTGGCTATGGTACAGATTTTGTTTTTACAATTGAAAACATGCTCTCAGAAGATGTTGCAGATTACTACTGTTTGCAAAGTGATAACTTGCCATTCACGTTCAGCTCGGGGACAAAGTTGGAAATAAAAC
				3	IGKV17-121*01	IGKJ4*01	99.6	\	Yes	AGCATCCCTGTCCATGGCTATAGGAGAAAAAGTCACCATCAGATGCATAACCAGCACTGATATTGATGATGACATGAACTGGTACCAGCAGAAGCCAGGGGAACCTCCTAAGCTCCTTATTTCAGAAGGCAATACTCTTCGTCCTGGAGTCCCATCCCGATTCTCCAGCAGTGGCTATGGTACAGATTTTGTTTTTACAATTGAAAACATGCTCTCAGAAGATGTTGCAGATTACTACTGTTTGCAAAGTGATAACTTGCCATTCACGTTCAGCTCGGGGACAAAGTTGGAAATAAAAC
				4	IGKV17-121*01	IGKJ4*01	99.6	\	Yes	AGCATCCCTGTCCATGGCTATAGGAGAAAAAGTCACCATCAGATGCATAACCAGCACTGATATTGATGATGACATGAACTGGTACCAGCAGAAGCCAGGGGAACCTCCTAAGCTCCTTATTTCAGAAGGCAATACTCTTCGTCCTGGAGTCCCATCCCGATTCTCCAGCAGTGGCTATGGTACAGATTTTGTTTTTACAATTGAAAACATGCTCTCAGAAGATGTTGCAGATTACTACTGTTTGCAAAGTGATAACTTGCCATTCACGTTCAGCTCGGGGACAAAGTTGGAAATAAAAC
				5	IGKV17-121*01	IGKJ4*01	99.6	\	Yes	AGCATCCCTGTCCATGGCTATAGGAGAAAAAGTCACCATCAGATGCATAACCAGCACTGATATTGATGATGACATGAACTGGTACCAGCAGAAGCCAGGGGAACCTCCTAAGCTCCTTATTTCAGAAGGCAATACTCTTCGTCCTGGAGTCCCATCCCGATTCTCCAGCAGTGGCTATGGTACAGATTTTGTTTTTACAATTGAAAACATGCTCTCAGAAGATGTTGCAGATTACTACTGTTTGCAAAGTGATAACTTGCCATTCACGTTCAGCTCGGGGACAAAGTTGGAAATAAAAC
				6	IGKV17-121*01	IGKJ4*01	99.2	\	Yes	AGCATCCCTGTCCATGGCTATAGGAGAAAAAGTCACCATCAGATGCATAACCAGCACTGATATTGATGATGACATGAACTGGTACCAGCAGAAGCCAGGGGAACCTCCTAAGCTCCTTATTTCAGAAGGCAATACTCTTCGTCCTGGAGTCCCATCCCGATTCTCCAGCAGTGGCTATGGTACAGATTTTGTTTTTACAATTGAAAACATGCTCTCAGAAGATGTTGCAGATTACTACTGTTTGTAAAGTGATAACTTGCCATTCACGTTCAGCTCGGGGACAAAGTTGGAAATAAAAC
				7	IGKV17-121*01	IGKJ4*01	99.6	\	Yes	AGCATCCCTGTCCATGGCTATAGGAGAAAAAGTCACCATCAGATGCATAACCAGCACTGATATTGATGATGACATGAACTGGTACCAGCAGAAGCCAGGGGAACCTCCTAAGCTCCTTATTTCAGAAGGCAATACTCTTCGTCCTGGAGTCCCATCCCGATTCTCCAGCAGTGGCTATGGTACAGATTTTGTTTTTACAATTGAAAACATGCTCTCAGAAGATGTTGCAGATTACTACTGTTTGCAAAGTGATAACTTGCCATTCACGTTCAGCTCGGGGACAAAGTTGGAAATAAAAC
				8	IGKV17-121*01	IGKJ4*01	98.9	\	Yes	AGCATCCCTGTCCATGGCTATAGGAGAAAAAGTCACCATCAGATGCATAACCAGCACTGATATTGATGGTGACATGAACTGGTACCAGCAGAAGCCAGGGGAACCTCCTAAGCTCCTTATTTCAGAAGGCAATACTCTTCGTCCTGGAGTCCCATCCCGATTCTCCAGCAGTGGCTATGGTACAGATTTTGTTTTTACAATTGAAAATATGCTCTCAGAAGATGTTGCAGATTACTACTGTTTGCAAAGTGATAACTTGCCATTCACGTTCAGCTCGGGGACAAAGTTGGAAATAAAAC
				9	IGKV17-121*01	IGKJ4*01	99.6	\	Yes	AGCATCCCTGTCCATGGCTATAGGAGAAAAAGTCACCATCAGATGCATAACCAGCACTGATATTGATGATGACATGAACTGGTACCAGCAGAAGCCAGGGGAACCTCCTAAGCTCCTTATTTCAGAAGGCAATACTCTTCGTCCTGGAGTCCCATCCCGATTCTCCAGCAGTGGCTATGGTACAGATTTTGTTTTTACAATTGAAAACATGCTCTCAGAAGATGTTGCAGATTACTACTGTTTGCAAAGTGATAACTTGCCATTCACGTTCAGCTCGGGGACAAAGTTGGAAATAAAAC
				10	IGKV17-121*01	IGKJ4*01	99.2	\	Yes	AGCATCCCTGTCCATGGCTATAGGAGAAAAAGTCACCATCAGATGCATAACCAGCACTGATATTGGTGATGACATGAACTGGTACCAGCAGAAGCCAGGGGAACCTCCTAAGCTCCTTATTTCAGAAGGCAATACTCTTCGTCCTGGAGTCCCATCCCGATTCTCCAGCAGTGGCTATGGTACAGATTTTGTTTTTACAATTGAAAACATGCTCTCAGAAGATGTTGCAGATTACTACTGTTTGCAAAGTGATAACTTGCCATTCACGTTCAGCTCGGGGACAAAGTTGGAAATAAAAC
			4	1	IGKV9-124*01	IGKJ1*01	99.6	\	Yes	CCATCCTCCTTATCTGCCTCTCTGGGAGAAAGAGTCAGTCTCACTTGTCGGGCAAGTCAGGAAATTAGTGGTTACTTAAGCTGGCTTCAGCAGGAACCAGATGGAACTATTAAACGCCTGATCTACGCCGCATCCACTTTAGATTCTGGTGTCCCAAAAAGGTTCAGTGGCAGTAGGTCTGGGTCAGATTATTCTCTCACCATCAGCAGCCTTGAGTCTGAAGATTTTGCAGACTATTACTGTCTACAATATGCTAGTTATCCGTGGACGTTCGGTGGAGGCACCAAGCTGGAAATCAAAC
				2	IGKV9-124*01	IGKJ1*01	99.6	\	Yes	CCATCCTCCTTATCTGCCTCTCTGGGAGAAAGAGTCAGTCTCACTTGTCGGGCAAGTCAGGAAATTAGTGGTTACTTAAGCTGGCTTCAGCAGGAACCAGATGGAACTATTAAACGCCTGATCTACGCCGCATCCACTTTAGATTCTGGTGTCCCAAAAAGGTTCAGTGGCAGTAGGTCTGGGTCAGATTATTCTCTCACCATCAGCAGCCTTGAGTCTGAAGATTTTGCAGACTATTACTGTCTACAATATGCTAGTTATCCGTGGACGTTCGGTGGAGGCACCAAGCTGGAAATCAAAC
				3	IGKV9-124*01	IGKJ1*01	99.2	\	Yes	CCATCCTCCTTATCTGCCTCTCTGGGAGAAAGAGTCAGTCTCACTTGTCGGGCAAGTCAGGAAATTAGTGGTTACTTAAGCTGGCTTCAGCAGGAACCAGATGGAACTATTAAACGCCTGATCTACGCTGCATCCACTTTAGATTCTGGTGTCCCAAAAAGGTTCAGTGGCAGTAGGTCTGGGTCAGATTATTCTCTCACCATCAGCAGCCTTGAGTCTGAAGATTTTGCAGACTATTACTGTCTACAATATGCTAGTTATCCGTGGACGTTCGGTGGAGGCACCAAGCTGGAAATCAAAC
			5	1	IGKV17-121*01	IGKJ5*01	98.5	\	Yes	AGCATCCCTGTCCGTGGCTACAGGAGAAAAAGTCACTATCAGATGCATAACCAGCACTGATATTGATGATGATATGAACTGGTACCAGCAGAAGCCAGGGGAACCTCCTAAGCTCCTTATTTCAGAAGGCAATACTCTTCGTCCTGGAGTCCCATCCCGATTCTCCAGCAGTGGCTATGGTACAGATTTTGTTTTTACAATTGAAAACATGCTCTCAGAAGATGTTGCAGATTACTACTGTTTGCAAAGTGATAACTTGCCGCTCACGTTCGGTGCTGGGACCAAGCTGGAGCTGAAAC
			6	1	IGKV9-120*01	IGKJ1*01	98.1	C	Yes	CCATCCTCCTTATCTGCCTCTCTGGGAGAAAGAGCCAGTCTCACTTGTCGGGCAAGTCAGGACATTGGTAGTAGCTTAAACTGGCTTCAGCAGGAACCAGATGGAACTATTAAACGCCTGATCTACGCCACATCCAGTTTAGATTCTGGTGTCCCAAAAAGGTTCAGTGGCAGTAGGTCTGGGTCAGATTATTCTCTCACCATCAGCAGCCTTGAGTCTGAAGATTTTGCAGACTATTACTGTCTACAATATGCTAGTTATCCTCGGACGTTCGGTGGAGGCACCAAGCTGGAAATCAAAC
				2	IGKV9-120*01	IGKJ1*01	97.7	C	Yes	CCATCCTCCTTATCTGCCTCTCTGGGAGAAAGAGCCAGTCTCACTTGTCGGGCAAGTCAGGACATTGGTAGTAGCTTAAACTGGCTTCAGCAGGAACCAGATGGAACTATTAAACGCCTGATCTACGCCACATCCAGTTTAGATTCTGGTGTCCCAAAAAGGTTCAGTGGCAGTAGGTCTGGGTCAGATTATTCTCTCATCATCAGCAGCCTTGAGTCTGAAGATTTTGCAGACTATTACTGTCTACAATATGCTAGTTATCCTCGGACGTTCGGTGGAGGCACCAAGCTGGAAATCAAAC
				3	IGKV9-120*01	IGKJ1*01	98.1	C	Yes	CCATCCTCCTTATCTGCCTCTCTGGGAGAAAGAGCCAGTCTCACTTGTCGGGCAAGTCAGGACATTGGTAGTAGCTTAAACTGGCTTCAGCAGGAACCAGATGGAACTATTAAACGCCTGATCTACGCCACATCCAGTTTAGATTCTGGTGTCCCAAAAAGGTTCAGTGGCAGTAGGTCTGGGTCAGATTATTCTCTCACCATCAGCAGCCTTGAGTCTGAAGATTTTGCAGACTATTACTGTCTACAATATGCTAGTTATCCTCGGACGTTCGGTGGAGGCACCAAGCTGGAAATCAAAC
		WT-5	1	1	IGKV9-120*01	IGKJ2*01	98.5	\	Yes	TGACCCAGACTCCATCCTCCTTATCTGCCTCTCTGGGAGAAAGAGTCAGTCCCACTTGTCAGGCAAGTCAGGACATTGGTAGTAGCTTAAACTGGCTTCAGCAGGAACCAGATGGAACTATTAAACGCCTGATCTACGCCACATCCAGTTTAGATTCTGGTGTCCCCAAAAGGTTCAGTGGCAGTAGGTCTGGGTCAGATTATTCTCTCACCATCAGCAGCCTTGAGTCTGAAGATTTTGTAGACTATTACTGTCTACAATATGCTAGTTCTCCGTACACGTTCGGCGGTGGAACCAA
				2	IGKV9-120*01	IGKJ2*01	96.8	\	Yes	GACATTGTGATCACACAGTCTCCATCCTCCTTATCTGCCTCTCTGGGAGAAAGAGTCAGTCCCACTTGTCAGGCAAGTCAGGACATTGGTAGTAGCTTAAACTGGCTTCAGCAGGAACCAGATGGAACTATTAAACGCCTGATCTACGCCACATCCAGTTTAGATTCTGGTGTCCCCAAAAGGTTCAGTGGCAGTAGGTCTGGGTCAGATTATTCTCTCACCATCGGCAGCCTTGAGTCTGAAGATTTTGTAGACTATTACTGTCTACAATATGCTAGTTCTCCGTACACGTTCGGTGGTGGAACCAAACTG
				3	IGKV9-120*01	IGKJ2*01	97.5	\	Yes	GACATTGTGATCACCCAGTCTCCATCCTCCTTATCTGCCTCTCTGGGAGAAAGAGTCAGTCCCACTTGTCAGGCAAGTCAGGACATTGGTAGTAGCTTAAACTGGCTTCAGCAGGAACCAGATGGAACTATTAAACGCCTGATCTACGCCACATCCAGTTTAGATTCTGGTGTCCCCAAAAGGTTCAGTGGCAGTAGGTCTGGGTCAGATTATTCTCTCACCATCAGCAGCCTTGAGTCTGAAGATTTTGTAGACTATTACTGTCTACAATATGCTAGTTCTCCGTACACGTTCGGTGGTGGAACCAAACTG
				4	IGKV9-120*01	IGKJ2*01	98.5	\	Yes	ACACAGTCTCCATCCTCCTTATCTGCCTCTCTGGGAGAAAGAGTCAGTCCCACTTGTCAGGCAAGTCAGGACATTGGTAGTAGCTTAAACTGGCTTCAGCAGGAACCAGATGGAACTATTAAACGCCTGATCTACGCCACATCCAGTTTAGATTCTGGTGTCCCCAAAAGGTTCAGTGGCAGTAGGTCTGGGTCAGATTATTCTCTCACCATCAGCAGCCTTGAGTCTGAAGATTTTGTAGACTATTACTGTCTACAATATGCTAGTTCTCCGTACACGTTCGGCGGTGGAACCAAGCTG
				5	IGKV9-120*01	IGKJ2*01	98.2	\	Yes	ACCCAGTCTACATCCTCCTTATCTGCCTCTCTGGGAGAAAGAGTCAGTCCCACTTGTCAGGCAAGTCAGGACATTGGTAGTAGCTTAAACTGGCTTCAGCAGGAACCAGATGGAACTATTAAACACCTGATCTACGCCACATCCAGTTTAGATTCTGGTGTCCCCAAAAGGTTCAGTGGCAGTAGGTCTGGGTCAGATTATTCTCTCACCATCAGCAGCCTTGAGTCTGAAGATTTTGTAGACTATTACTGTCTACAATATGCTAGTTCTCCGTACACGTTCGGCGGTGGAACCAACCTG
				6	IGKV9-120*01	IGKJ2*01	96.1	\	Yes	GACATTGTGCTCACACAGACTACATCCTCCTTATCTGCCTCTCTGGGAGAAAGAGTCAGTCCCACTTGTCAGGCAAGTCAGGACATTGGTAGTAGCTTAAACTGGCTTCAGCAGGAACCAGATGGAACTATTAAACGCCTGATCTACGCCACATCCAGTTTAGATTCTGGTGTCCCCAAAAGGTTCAGTGGCAGTAGGTCTGGGTCAGATTATTCTCTCACCATCAGCAGCCTTGAGTCTGAAGATTTTGTAGACTATTACTGTCTACAATATGCTAGTTCTCCGTACACGTTCGGCGGTGGAACCAAGCTG
				7	IGKV9-120*01	IGKJ2*01	98	\	Yes	TGACCCAGACTCCATCCTCCTTATCTGCCTCTCTGGGAGAAAGAGTCAGTCCCACTTGTCAGGCAAGTCAGGACATTGGTAGTAGCTTAAACTGGCTTCAGCAGGAACCAGATGGAACTATTAAACGCCTGATCTACGCCACATCCAGTTTAGATTCTGGTGTCCCCAAAAGGTTCAGTGGCAGTAGGTCTGGGTCAGATTATTCTCTCACCATCAGCAGCCTTGAGTCTGAAGATTTTGTAGACTATTACTGTCTACAATATGCTAGTTCTCCGTACACGTTCGGCGGTGGAACCAA
				8	IGKV9-120*01	IGKJ2*01	98.5	\	Yes	TGACCCAATCTCCATCCTCCTTATCTGCCTCTCTGGGAGAAAGAGTCAGTCCCACTTGTCAGGCAAGTCAGGACATTGGTAGTAGCTTAAACTGGCTTCAGCAGGAACCAGATGGAACTATTAAACGCCTGATCTACGCCACATCCAGTTTAGATTCTGGTGTCCCCAAAAGGTTCAGTGGCAGTAGGTCTGGGTCAGATTATTCTCTCACCATCAGCAGCCTTGAGTCTGAAGATTTTGTAGACTATTACTGTCTACAATATGCTAGTTCTCCGTACACGTTCGGTGGTGGAACCAAGCT
				9	IGKV9-120*01	IGKJ2*01	97.2	\	Yes	GACATTGTGCTGACCCAGACTCCATCCTCCTTATCTGCCTCTCTGGGAGAAAGAGTCAGTCCCACTTGTCAGGCAAGTCAGGACATTGGTAGTAGCTTAAACTGGCTTCAGCAGGAACCAGATGGAACTATTAAACGCCTGATCTACGCCACATCCAGTTTAGATTCTGGTGTCCCCAAAAGGTTCAGTGGCAGTAGGTCTGGGTCAGATTATTCTCTCACCATCAGCAGCCTTGAGTCTGAAGATTTTGTAGACTATTACTGTCTACAATATGCTAGTTCTCCGTACACGTTCGGCGGTGGAACCAA
				10	IGKV9-120*01	IGKJ2*01	96.8	\	Yes	GACATTGTGCTGACACAGACTCCATCCTCCTTATCTGCCTCTCTGGGAGAAAGAGTCAGTCCCACTTGTCAGGCAAGTCAGGACATTGGTAGTAGCTTAAACTGGCTTCAGCAGGAACCAGATGGAACTATTAAACGCCTGATCTACGCCACATCCAGTTTAGATTCTGGTGTCCCCAAAAGGTTCAGTGGCAGTAGGTCTGGGTCAGATTATTCTCTCACCATCAGCAGCCTTGAGTCTGAAGATTTTGTAGACTATTACTGTCTACAATATGCTAGTTCTCCGTACACGTTCGGTGGTGGAACCAAG
			2	1	IGKV14-100*01	IGKJ2*01	97.9	\	Yes	GATATTGTGCTGACACAGTCTCCATCCTCCATGTCTGTATCTCTGGGAGACACAGTCAGCATCACTTGCCATGCAAGTCAGGGCATTAGCAGTAATATAGGGTGGTTGCAGCAGAAACCAGGGAAATCATTTAAGGGCCTGATCTATCATGGAACCAACTTGGAAGATGGAGTTCCATCAAGGTTCAGTGGCAGTGGATCTGGAGCAGATTATTCTCTCACCATCAGCAGCCTGGAATCTGAAGATTTTGCAGACTATTACTGTGTACAGTATGCTCAGTTTCCGTACACGTTCGGCGGTGGAACCAA
				2	IGKV14-100*01	IGKJ2*01	97.9	\	Yes	GATATTGTGCTGACCCAGACTCCATCCTCCATGTCTGTATCTCTGGGAGACACAGTCAGCATCACTTGCCATGCAAGTCAGGGCATTAGCAGTAATATAGGGTGGTTGCAGCAGAAACCAGGGAAATCATTTAAGGGCCTGATCTATCATGGAACCAACTTGGAAGATGGAGTTCCATCAAGGTTCAGTGGCAGTGGATCTGGAGCAGATTATTCTCTCACCATCAGCAGCCTGGAATCTGAAGATTTTGCAGACTATTACTGTGTACAGTATGCTCAGTTTCCGTACACGTTCGGTGGTGGAACCAAACTG
				3	IGKV14-100*01	IGKJ2*01	97.9	\	Yes	GATATTGTGCTGACCCAGACTCCATCCTCCATGTCTGTATCTCTGGGAGACACAGTCAGCATCACTTGCCATGCAAGTCAGGGCATTAGCAGTAATATAGGGTGGTTGCAGCAGAAACCAGGGAAATCATTTAAGGGCCTGATCTATCATGGAACCAACTTGGAAGATGGAGTTCCATCAAGGTTCAGTGGCAGTGGATCTGGAGCAGATTATTCTCTCACCATCAGCAGCCTGGAATCTGAAGATTTTGCAGACTATTACTGTGTACAGTATGCTCAGTTTCCGTACACGTTCGGTGGTGGAACCAAGCTG
				4	IGKV14-100*01	IGKJ2*01	97.5	\	Yes	GATATTGTGCTGACACAGACTCCATCCTCCATGTCTGTATCTCTGGGAGACACAGTCAGCATCACTTGCCATGCAAGTCAGGGCATTAGCAGTAATATAGGGTGGTTGCAGCAGAAACCAGGGAAATCATTTAAGGGCCTGATCTATCATGGAACCAACTTGGAAGATGGAGTTCCATCAAGGTTCAGTGGCAGTGGATCTGGAGCAGATTATTCTCTCACCATCAGCAGCCTGGAATCTGAAGATTTTGCAGACTATTACTGTGTACAGTATGCTCAGTTTCCGTACACGTTCGGTGGTGGAACCAAACTG
				5	IGKV14-100*01	IGKJ2*01	97.9	\	Yes	GATATTGTGCTGACCCAGACTCCATCCTCCATGTCTGTATCTCTGGGAGACACAGTCAGCATCACTTGCCATGCAAGTCAGGGCATTAGCAGTAATATAGGGTGGTTGCAGCAGAAACCAGGGAAATCATTTAAGGGCCTGATCTATCATGGAACCAACTTGGAAGATGGAGTTCCATCAAGGTTCAGTGGCAGTGGATCTGGAGCAGATTATTCTCTCACCATCAGCAGCCTGGAATCTGAAGATTTTGCAGACTATTACTGTGTACAGTATGCTCAGTTTCCGTACACGTTCGGTGGTGGAACCAAGCTG
				6	IGKV14-100*01	IGKJ2*01	97.5	\	Yes	GATATTGTGCTGACCCAGACTACATCCTCCATGTCTGTATCTCTGGGAGACACAGTCAGCATCACTTGCCATGCAAGTCAGGGCATTAGCAGTAATATAGGGTGGTTGCAGCAGAAACCAGGGAAATCATTTAAGGGCCTGATCTATCATGGAACCAACTTGGAAGATGGAGTTCCATCAAGGTTCAGTGGCAGTGGATCTGGAGCAGATTATTCTCTCACCATCAGCAGCCTGGAATCTGAAGATTTTGCAGACTATTACTGTGTACAGTATGCTCAGTTTCCGTACACGTTCGGTGGTGGAACCAATCTG
				7	IGKV14-100*01	IGKJ2*01	97.5	\	Yes	GACATTGTGCTGACACAGACTACATCCTCCATGTCTGTATCTCTGGGAGACACAGTCAGCATCACTTGCCATGCAAGTCAGGGCATTAGCAGTAATATAGGGTGGTTGCAGCAGAAACCAGGGAAATCATTTAAGGGCCTGATCTATCATGGAACCAACTTGGAAGATGGAGTTCCATCAAGGTTCAGTGGCAGTGGATCTGGAGCAGATTATTCTCTCACCATCAGCAGCCTGGAATCTGAAGATTTTGCAGACTATTACTGTGTACAGTATGCTCAGTTTCCGTACACGTTCGGTGGTGGAACCAAGCT
				8	IGKV14-100*01	IGKJ2*01	97.5	\	Yes	GATATTGTGCTGACCCAGACTACATCCTCCATGTCTGTATCTCTGGGAGACACAGTCAGCATCACTTGCCATGCAAGTCAGGGCATTAGCAGTAATATAGGGTGGTTGCAGCAGAAACCAGGGAAATCATTTAAGGGCCTGATCTATCATGGAACCAACTTGGAAGATGGAGTTCCATCAAGGTTCAGTGGCAGTGGATCTGGAGCAGATTATTCTCTCACCATCAGCAGCCTGGAATCTGAAGATTTTGCAGACTATTACTGTGTACAGTATGCTCAGTTTCCGTACACGTTCGGCGGTGGAACCAA
				9	IGKV14-100*01	IGKJ2*01	97.2	\	Yes	GATATTGTGCTGACACAGTCTCCATCCTCCATGTCTGTATCTCTGGGAGACACAGTCAGCATCACTTGCCATGCAAGTCAGGGCATTAGCAGTAATATAGGGTGGTTGCAGCAGAAACCAGGGAAATCATTTAAGGGCCTGATCTATCATGGAACCAACTTGGAAGATGGAGTTCCGTCAAGGTTCAGTGGCAGTGGATCTGGAGCAGATTATTCTCTCACCATCAGCAGCCTGGAATCTGAAGATTTTGCAGACTATTACTGTGTACAGCATGCTCAGTTTCCGTACACGTTCGGCGGTGGAACCAA
				10	IGKV14-100*01	IGKJ2*01	98.2	\	Yes	GACATTGTGCTGACCCAGACTCCATCCTCCATGTCTGTATCTCTGGGAGACACAGTCAGCATCACTTGCCATGCAAGTCAGGGCATTAGCAGTAATATAGGGTGGTTGCAGCAGAAACCAGGGAAATCATTTAAGGGCCTGATCTATCATGGAACCAACTTGGAAGATGGAGTTCCATCAAGGTTCAGTGGCAGTGGATCTGGAGCAGATTATTCTCTCACCATCAGCAGCCTGGAATCTGAAGATTTTGCAGACTATTACTGTGTACAGTATGCTCAGTTTCCGTACACGTTCGGCGGTGGAACCAA
			3	1	IGKV9-120*01	IGKJ2*01	98.2	\	Yes	TGACCCAGTCTCCATCCTCCTTATCTGCCTCTCTGGGAGAAAGAGTCAGTCCCACTTGTCAGGCAAGTCAGGACATTGGTAGTAGCTTAAACTGGCTTCAGCAGGAACCAGATGGAACTATTAAACGCCTGATCTACGCCACATCCAGTTTAGATTCTGGTGTCCCCAAAAGGTTCAGTGGCAGTAGGTCTGGGTCAGATTATTCTCTCACCATCAGCAGCCTTGAGCCTGAAGATTTTGTAGACTATTACTGTCTACAATATGCTGGTTCTCCGTACACGTTCGGCGGTGGAACCAA
				2	IGKV9-120*01	IGKJ2*01	97.5	\	Yes	GACATTGTGATGACACAGTCTCCATCCTCCTTATCTGCCTCTCTGGGAGAAAGAGTCAGTCCCACTTGTCAGGCAAGTCAGGACATTGGTAGTAGCTTAAACTGGCTTCAGCAGGAACCAGATGGAACTATTAAACGCCTGATCTACGCCACATCCAGTTTAGATTCTGGTGTCCCCAAAAGGTTCAGTGGCAGTAGGTCTGGGTCAGATTATTCTCTCACCATCAGCAGCCTTGAGTCTGAAGATTTTGTAGACTATTACTGTCTACAATATGCTAGTTCTCCGTACACGTTCGGTGGTGGAACCAACCTG
				3	IGKV9-120*01	IGKJ2*01	96.1	\	Yes	GACATTGTGATCACCCAATCTACATCCTCCTTATCTGCCTCTCTGGGAGAAAGAGTCAGTCCCACTTGTCAGGCAAGTCAGGACATTGGTAGTAGCTTAAACTGGCTTCAGCAGGAACCAGATGGAACTATTAAACGCCTGATCTACGCCACATCCAGTTTAGATTCTGGTGTCCCCAGAAGGTTCAGTGGCAGTAGGTCTGGGTCAGATTATTCTCTCACCGTCAGCAGCCTTGAGTCTGAAGATTTTGTAGACTATTACTGTCTACAATATGCTAGTTCTCCGTACACGTTCGGTGGTGGAACCAAACTG
				4	IGKV9-120*01	IGKJ2*01	98.6	\	Yes	GATCACCCAGTCTCCATCCTCCTTATCTGCCTCTCTGGGAGAAAGAGTCAGTCCCACTTGTCAGGCAAGTCAGGACATTGGTAGTAGCTTAAACTGGCTTCAGCAGGAACCAGATGGAACTATTAAACGCCTGATCTACGCCACATCCAGTTTAGATTCTGGTGTCCCCAAAAGGTTCAGTGGCAGTAGGTCTGGGTCAGATTATTCTCTCACCATCAGCAGCCTTGAGTCTGAAGATTTTGTAGACTATTACTGTCTACAATATGCTAGTTCTCCGTACACGTTCGGTGGTGGAACCAACCTG
				5	IGKV9-120*01	IGKJ2*01	97.5	\	Yes	GATCACCCAGACTACATCCTCCTTATCTGCCTCTCTGGGAGAAAGAGTCAGTCCCACTTGTCAGGCAAGTCAGGACATTGGTAGTAGCTTAAACTGGCTTCAGCAGGAACCAGATGGAACTATTAAACGCCTGATCTACGCCACATCCAGTTTAGATTCTGGTGTCCCCAAAAGGTTCAGTGGCAGTAGGTCTGGGTCAGATTATTCTCTCACCATCAGCAGCCTTGAGTCTGAAGATTCTGTAGACTATTACTGTCTACAATATGCTAGTTCTCCGTACACGTTCGGCGGTGGAACCAAACTG
				6	IGKV9-120*01	IGKJ2*01	97.2	\	Yes	GACATTGTGCTGACCCAGACTCCATCCTCCTTATCTGCCTCTCTGGGAGAAAGAGTCAGTCCCACTTGTCAGGCAAGTCAGGACATTGGTAGTAGCTTAAACTGGCTTCAGCAGGAACCAGATGGAACTATTAAACGCCTGATCTACGCCACATCCAGTTTAGATTCTGGTGTCCCCAAAAGGTTCAGTGGCAGTAGGTCTGGGTCAGATTATTCTCTCACCATCAGCAGCCTTGAGTCTGAAGATTTTGTAGACTATTACTGTCTACAATATGCTAGTTCTCCGTACACGTTCGGCGGTGGAACCAAACTG
				7	IGKV9-120*01	IGKJ2*01	97.8	\	Yes	TGACCCAATCTCCATCCTCCTTATCTGCCTCTCAGGGAGAAAGAGTCAGTCCCACTTGTCAGGCAAGTCAGGACATTGGTAGTAGCTTAAACTGGCTTCAGCAGGAACCAGATGGAACTATTAAACGCCTGATCTACGCCACATCCAGTTTAGATTCTGGTGTCCCCAAAAGGTTCAGTGGCAGTAGGTCTGGGTCAGATTATTCTCTCGCCATCAGCAGCCTTGAGTCTGAAGATTTTGTAGACTATTACTGTCTACAATATGCTAGTTCTCCGTACACGTTCGGTGGTGGAACCAA
				8	IGKV9-120*01	IGKJ2*01	97.5	\	Yes	GACATTGTGATGACCCAATCTCCATCCTCCTTATCTGCCTCTCTGGGAGAAAGAGTCAGTCCCACTTGTCAGGCAAGTCAGGACATTGGTAGTAGCTTAAACTGGCTTCAGCAGGAACCAGATGGAACTATTAAACGCCTGATCTACGCCACATCCAGTTTAGATTCTGGTGTCCCCAAAAGGTTCAGTGGCAGTAGGTCTGGGTCAGATTATTCTCTCACCATCAGCAGCCTTGAGTCTGAAGATTTTGTAGACTATTACTGTCTACAATATGCTAGTTCTCCGTACACGTTCGGCGGTGGAACCAAGCT
				9	IGKV9-120*01	IGKJ2*01	97.2	\	Yes	GACATTGTGATGACACAGACTCCATCCTCCTTATCTGCCTCTCTGGGAGAAAGAGTCAGTCCCACTTGTCAGGCAAGTCAGGACATTGGTAGTAGCTTAAACTGGCTTCAGCAGGAACCAGATGGAACTATTAAACGCCTGATCTACGCCACATCCAGTTTAGATTCTGGTGTCCCCAAAAGGTTCAGTGGCAGTAGGTCTGGGTCAGATTATTCTCTCACCATCAGCAGCCTTGAGTCTGAAGATTTTGTAGACTATTACTGTCTACAATATGCTAGTTCTCCGTACACGTTCGGCGGTGGAACCAA
				10	IGKV9-120*01	IGKJ2*01	97.5	\	Yes	GACATTGTGCTGACCCAGTCTCCATCCTCCTTATCTGCCTCTCTGGGAGAAAGAGTCAGTCCCACTTGTCAGGCAAGTCAGGACATTGGTAGTAGCTTAAACTGGCTTCAGCAGGAACCAGATGGAACTATTAAACGCCTGATCTACGCCACATCCAGTTTAGATTCTGGTGTCCCCAAAAGGTTCAGTGGCAGTAGGTCTGGGTCAGATTATTCTCTCACCATCAGCAGCCTTGAGTCTGAAGATTTTGTAGACTATTACTGTCTACAATATGCTAGTTCTCCGTACACGTTCGGCGGTGGAACCAA
			4	1	IGKV14-100*01	IGKJ2*01	97.2	\	Yes	GATATTGTGATGACCCAGACTCCATCCCCCATGTCCGTATCTCTGGGAGACACAGTCAGCATCACTTGCCATGCAAGTCAGGGCATTAGCAGTAATATAGGGTGGTTGCAGCAGAAACCAGGGAAATCATTTAAGGGCCTGATCTATCATGGAACCAACTTGGAAGATGGAGTTCCATCAAGGTTCAGTGGCAGTGGATCTGGAGCAGATTATTCTCTCACCATCAGCAGCCTGGAATCTGGAGATTTTGCAGACTATTACTGTGTACAGTATGCTCAGTTTCCGTACACGTTCGGTGGTGGAACCAA
				2	IGKV14-100*01	IGKJ2*01	97.2	\	Yes	GATATTGTGATGACCCAGACTCCATCCTCCATGTCCGTATCTCTGGGAGACACAGTCAGCATCACTTGCCATGCAAGTCAGGGCATTAGCAGTAATATAGGGTGGTTGCAGCAGAAACCAGGGAAATCATTTAAGGGCCTGATCTATCATGGAACCAACTTGGAAGATGGAGTTCCATCAAGGTTCAGTGGCAGTGGATCTGGAGCAGATTATTCTCTCACCATCAGCAGCCTAGAATCTGGAGATTTTGCAGACTATTACTGTGTACAGTATGCTCAGTTTCCGTACACGTTCGGCGGTGGAACCAAGCTG
				3	IGKV14-100*01	IGKJ2*01	97.9	\	Yes	GACATTGTGATGACCCAGTCTACATCCTCCATGTCCGTATCTCTGGGAGACACAGTCAGCATCACTTGCCATGCAAGTCAGGGCATTAGCAGTAATATAGGGTGGTTGCAGCAGAAACCAGGGAAATCATTTAAGGGCCTGATCTATCATGGAACCAACTTGGAAGATGGAGTTCCATCAAGGTTCAGTGGCAGTGGATCTGGAGCAGATTATTCTCTCACCATCAGCAGCCTGGAATCTGGAGATTTTGCAGACTATTACTGTGTACAGTATGCTCAGTTTCCGTACACGTTCGGTGGTGGAACCAA
				4	IGKV14-100*01	IGKJ2*01	97.5	\	Yes	GACATTGTGCTCACACAATCTCCATCCTCCATGTCCGTATCTCTGGGAGACACAGTCAGCATCACTTGCCATGCAAGTCAGGGCATTAGCAGTAATATAGGGTGGTTGCAGCAGAAACCAGGGAAATCATTTAAGGGCCTGATCTATCATGGAACCAACTTGGAAGATGGAGTTCCATCAAGGTTCAGTGGCAGTGGATCTGGAGCAGATTATTCTCTCACCATCAGCAGCCTGGAATCTGGAGATTTTGCAGACTATTACTGTGTACAGTATGCTCAGTTTCCGTACACGTTCGGTGGTGGAACCAAACTG
				5	IGKV14-100*01	IGKJ2*01	99.2	\	Yes	CTCCATGTCCGTATCTCTGGGAGACACAGTCAGCATCACTTGCCATGCAAGTCAGGGCATTAGCAGTAATATAGGGTGGTTGCAGCAGAAACCAGGGAAATCATTTAAGGGCCTGATCTATCATGGAACCAACTTGGAAGATGGAGTTCCATCAAGGTTCAGTGGCAGTGGATCTGGAGCAGATTATTCTCTCACCATCAGCAGCCTGGAATCTGGAGATTTTGCAGACTATTACTGTGTACAGTATGCTCAGTTTCCGTACACGTTCGGCGGTGGAACCAACCTG
				6	IGKV14-100*01	IGKJ2*01	97.2	\	Yes	GATATTGTGCTGACCCAAACTACATCCTCCATGTCCGTATCTCTGGGAGACACAGTCAGCATCACTTGCCATGCAAGTCAGGGCATTAGCAGTAATATAGGGTGGTTGCAGCAGAAACCAGGGAAATCATTTAAGGGCCTGATCTATCATGGAACCAACTTGGAAGATGGAGTTCCATCAAGGTTCAGTGGCAGTGGATCTGGAGCAGATTATTCTCTCACCATCAGCAGCCTGGAATCTGGAGATTTTGCAGACTATTACTGTGTACAGTATGCTCAGTTTCCGTACACGTTCGGTGGTGGAACCAA
				7	IGKV14-100*01	IGKJ2*01	96.8	\	Yes	GATATTGTGCTGACACAAACTCCATCCTCCATGTCCGTATCTCTGGGAGACACAGTCAGCATCACTTGCCATGCAAGTCAGGGCATTAGCAGTAATATAGGGTGGTTGCAGCAGAAACCAGGGAAATCATTTAAGGGCCTGATCTATCATGGAACCAACTTGGAAGATGGAGTTCCATCAAGGTTCAGTGGCAGTGGATCTGGAGCAGATTATTCTCTCACCATCAGCAGCCTGGAATCTGGAGATTTTGCAGACTATTACTGTGTATAGTATGCTCAGTTTCCGTACACGTTCGGCGGTGGAACCAA
				8	IGKV14-100*01	IGKJ2*01	97.9	\	Yes	GACATTGTGATGACCCAAACTACATCCTCCATGTCCGTATCTCTGGGAGACACAGTCAGCATCACTTGCCATGCAAGTCAGGGCATTAGCAGTAATATAGGGTGGTTGCAGCAGAAACCAGGGAAATCATTTAAGGGCCTGATCTATCATGGAACCAACTTGGAAGATGGAGTTCCATCAAGGTTCAGTGGCAGTGGATCTGGAGCAGATTATTCTCTCACCATCAGCAGCCTGGAATCTGGAGATTTTGCAGACTATTACTGTGTACAGTATGCTCAGTTTCCGTACACGTTCGGCGGTGGAACCAA
				9	IGKV14-100*01	IGKJ2*01	97.9	\	Yes	GACATTGTGATGACCCAAACTCCATCCTCCATGTCCGTATCTCTGGGAGACACAGTCAGCGTCACTTGCCATGCAAGTCAGGGCATTAGCAGTAATATAGGGTGGTTGCAGCAGAAACCAGGGAAATCATTTAAGGGCCTGATCTATCATGGAACCAACTTGGAAGATGGAGTTCCATCAAGGTTCAGTGGCAGTGGATCTGGAGCAGATTATTCTCTCACCATCAGCAGCCTGGAATCTGGAGATTTTGCAGACTATTACTGTGTACAGTATGCTCAGTTTCCGTACACGTTCGGCGGTGGAACCAAGCT
			5	1	IGKV9-120*01	IGKJ2*01	98.9	\	Yes	GATGACCCAGTCTCCATCCTCCTTATCTGCCTCTCTGGGAGAAAGAGTCAGTCCCACTTGTCAGGCAAGTCAGGACATTGGTAGTAGCTTAAACTGGCTTCAGCAGGAACCAGATGGAACTATTAAACGCCTGATCTACGCCACATCCAGTTTAGATTCTGGTGTCCCCAAAAGGTTCAGTGGCAGTAGGTCTGGGTCAGATTATTCTCTCACCATCAGCAGCCTTGAGTCTGAAGATTTTGTAGACTATTACTGTCTACAATATGCTAGTTCTCCGTACACGTTCGGTGGTGGAACCAA
				2	IGKV9-120*01	IGKJ2*01	98.2	\	Yes	ACCCAGACTACATCCTCCTTATCTGCCTCTCTGGGAGAAAGAGTCAGTCCCACTTGTCAGGCAAGTCAGGACATTGGTAGTAGCTTAAACTGGCTTCAGCAGGAACCAGATGGAACTATTAAACGCCTGATCTACGCCACATCCAGTTTAGATTCTGGTGTCCCCAAAAGGTTCAGTGGCAGTAGGTCTGGGTCAGATTATTCTCTCACCATCAGCAGCCTTGAGTCTGAAGATTTTGTAGACTATTACTGTCTACAATATGCTAGTTCTCCGTACACGTTCGGCGGTGGAACCAACCTG
				3	IGKV9-120*01	IGKJ2*01	97.4	\	Yes	TGACACAAACTACATCCTCCTTATCTGCCTCTCTGGGAGAAAGAGTCAGTCCCACTTGTCAGGCAAGTCAGGACATTGGTAGTAGCTTAAACTGGCTTCAGCAGGAACCAGATGGAACTATTAAACGCCTGATCTACGCCACATCCAGTTTAGATTCTGGTGTCCCCAAAAGGTTCAGTGGCAGTAGGTCTGGGTCAGATTATTCTCTCACCATCAGCAGCCTTGAGTCTGAAGATTTTGTAGACTATTACTGTCTACAATATGCTAGTTCTCCGTACACGTTCGGCGGTGGAACCAAGCTG
				4	IGKV9-120*01	IGKJ2*01	95.8	\	Yes	GACATTGTGCTGACACAAACTACATCCTCCTTATCTGCCTCTCTGGGAGAAAGAGTCAGTCCCACTTGTCAGGCAAGTCAGGACATTGGTAGTAGCTTAAACTGGCTTCAGCAGGAACCAGATGGAACTATTAAACGCCTGATCTACGCCACATCCAGTTTAGATTCTGGTGTCCCCAAAAGGTTCAGTGGCAGTAGGTCAGGGTCAGATTATTCTCTCACCATCAGCAGCCTTGAGTCTGAAGATTTTGTAGACTATTACTGTCTACAATATGCTAGTTCTCCGTACACGTTCGGTGGTGGAACCAATCTG
				5	IGKV9-120*01	IGKJ2*01	95.1	\	Yes	GACATTGTGATCACACAAACTACATCCTCCTTATCTGCCTCTCTGGGAGAAAGAGTCAGTCCCACTTGTCAGGCAAGCCAGGACATTGGTAGTAGCTTAAACTGGCTTCAGCAGGAACCAGATGGAACTATTAAACGCCTGATCTACGCCACATCCAGTTTAGATTCTGGTGTCCCCAAAAGGTTCAGTGGCAGTAGGTCTGGGACAGATTATTCCCTCACCATCAGCAGCCTTGAGTCTGAAGATTTTGTAGACTATTACTGTCTACAATATGCTAGTTCTCCGTACACGTTCGGTGGTGGAACCAATCTG
				6	IGKV9-120*01	IGKJ2*01	96.5	\	Yes	GACATTGTGCTGACCCAATCTACATCCTCCTTATCTGCCTCTCTGGGAGAAAGAGTCAGTCCCACTTGTCAGGCAAGTCAGGACATTGGTAGTGGCTTAAACTGGCTTCAGCAGGAACCAGATGGAACTATTAAACGCCTGATCTACGCCACATCCAGTTTAGATTCTGGTGTCCCCAAAAGGTTCAGTGGCAGTAGGTCTGGGTCAGATTATTCTCTCACCATCAGCAGCCTTGAGTCTGAAGATTTTGTAGACTATTACTGTCTACAATATGCTAGTTCTCCGTACACGTTCGGTGGTGGAACCAAGCTG
				7	IGKV9-120*01	IGKJ2*01	97.9	\	Yes	GACATTGTGATGACCCAGTCTCCATCCTCCTTATCTGCCTCTCTGGGAGAAAGAGTCAGTCCCACTTGTCAGGCAAGTCAGGACATTGGTAGTAGCTTAAACTGGCTTCAGCAGGAACCAGATGGAACTATTAAACGCCTGATCTACGCCACATCCAGTTTAGATTCTGGTGTCCCCAAAAGGTTCAGTGGCAGTAGGTCTGGGTCAGATTATTCTCTCACCATCAGCAGCCTTGAGTCTGAAGATTTTGTAGACTATTACTGTCTACAATATGCTAGTTCTCCGTACACGTTCGGCGGTGGAACCAA
				8	IGKV9-120*01	IGKJ2*01	96.8	\	Yes	GACATTGTGCTCACCCAATCTCCATCCTCCTTATCTGCCTCTCTGGGAGAAAGAGTCAGTCCCACTTGTCAGGCAAGTCAGGACATTGGTAGTAGCTTAAACTGGCTTCAGCAGGAACCAGATGGAACTATTAAACGCCTGATCTACGCCACATCCAGTTTAGATTCTGGTGTCCCCAAAAGGTTCAGTGGCAGTAGGTCTGGGTCAGATTATTCTCTCACCATCAGCAGCCTTGAGTCTGAAGATTTTGTAGACTATTACTGTCTACAATATGCTAGTTCTCCGTACACGTTCGGCGGTGGAACCAA
				9	IGKV9-120*01	IGKJ2*01	96.8	\	Yes	GACATTGTGCTGACCCAAACTCCATCCTCCTTATCTGCCTCTCTGGGAGAAAGAGTCAGTCCCACTTGTCAGGCAAGTCAGGACATTGGTAGTAGCTTAAACTGGCTTCAGCAGGAACCAGATGGAACTATTAAACGCCTGATCTACGCCACATCCAGTTTAGATTCTGGTGTCCCCAAAAGGTTCAGTGGCAGTAGGTCTGGGTCAGATTATTCTCTCACCATCAGCAGCCTTGAGTCTGAAGATTTTGTAGACTATTACTGTCTACAATATGCTAGTTCTCCGTACACGTTCGGTGGTGGAACCAA
				10	IGKV9-120*01	IGKJ2*01	97.5	\	Yes	GATCACCCAATCTCCATCCTCCTTATCTGCCTCTCTGGGAGAAAGAGTCAGTTCCACTTGTCAGGCAAGTCAGGACATTGGTAGTAGCTTAAACTGGCTTCAGCAGGAACCAGATGGAACTATTAAACGCCTGACCTACGCCACATCCAGTTTAGATTCTGGTGTCCCCAAAAGGTTCAGTGGCAGTAGGTCTGGGTCAGATTATTCTCTCACCATCAGCAGCCTTGAGTCTGAAGATTTTGTAGACTATTACTGTCTACAATATGCTAGTTCTCCGTACACGTTCGGCGGTGGAACCAA
			6	1	IGKV8-30*01	IGKJ4*01	79.6	GATACCCCGG	Yes	GATATTGTGCTGACCCAGTCTACAGACTCCCTGGTTGTGTCTCTGGGCGAGAGGGCCTCCATCAACTGCAAGTCCAGTCAGAGAGTTTCACTCGGCTCCAACAATAAGAACTACTTAGCTTGGTATCAGCACCAACCAGGACAGCCTCCTAGGCTGCTCATTTACTGGGCATCTACCCGGGAATCCGGGGTCCCTGACCGATTCAGTGGCAGCGGGTCTGGGACAGATTTCACTCTCACCATCAACAGCCTGCAGGCTGAAGATGTGGCGGTTTATTACTGTCAGCAATATTATGATACCCCGGTCACGTTCGGC
				2	IGKV9-120*01	IGKJ1*01	97.5	\	Yes	GACATTGTGCTGACCCAATCTACATCCTCCTTATCTGCCTCTCTGGGAGAAAGAGTCAGTCTCACTTGTCGGGCAAGTCAGGACATTGGTAGTAGCTTAAACTGGCTTCAGCAGGAACCAGATGGAACTATTAAACGCCTGATCTACGCCACATCCAGTTTAGATTCTGGTGTCCCCAAAAGGTTCAGTGGCAGTAGGTCTGGGTCAGATTATTCTCTCACCATCAGCAGCCTTGAGTCTGAAGATTTTGTAGACTATTACTGTCTACAATATGCTAGTTCTCCGTGGACGTTCGGTGGTGGAACCAATCTG
				3	IGKV9-120*01	IGKJ1*01	97.9	\	Yes	GACATTGTGATGACCCAGTCTCCATCCTCCTTATCTGCCTCTCTGGGAGAAAGAGTCAGTCTCACTTGTCGGGCAAGTCAGGACATTGGTAGTAGCTTAAACTGGCTTCAGCAGGAACCAGATGGAACTATCAAACGCCTGATCTACGCCACATCCAGTTTAGATTCTGGTGTCCCCAAAAGGTTCAGTGGCAGTAGGTCTGGGTCAGATTATCCTCTCACCATCAGCAGCCTTGAGTCTGAAGATTTTGTAGACTATTACTGTCTACAATATGCTAGTTCTCCGTGGACGTTCGGTGGTGGAACCAACCTG
				4	IGKV8-30*01	IGKJ5*01	79.3	GATACCCCGG	Yes	GACATTGTGCTGACCCAAACTCCAGACTCCCTGGTTGTGTCTCTGGGCGAGAGGGCCTCCATCAACTGCAAGTCCAGTCAGAGAGTTTCACTCGGCTCCAACAATAAGAACTACTTAGCTTGGTATCAGCACCAACCAGGACAGCCTCCTAGGCTGCTCATTTACTGGGCATCTACCCGGGAATCCGGGGTCCCTGACCGATTCAGTGGCAGCGGGTCTGGGACAGATTTCACTCTTACCATCAACAGCCTGCAGGCTGAAGATGTGGCGGTTTATTACTGTCAGCAATATTATGATACCCCGGTCACGTTCGGTGGTGGAACCAACCTG
				5	IGKV8-30*01	IGKJ5*01	79.3	GATACCCCGG	Yes	GACATTGTGATGACCCAATCTACAGACTCCCTGGTTGTGTCTCTGAGCGAGAGGGCCTCCATCAACTGCAAGTCCAGTCAGAGAGTTTCACTCGGCTCCAACAATTAGAACTACTTAGCTTGGTATCAGCACCAACCAGGACAGCCTCCTAGGCTGCTCATTTACTGGGCATCTACCCGGGAATCCGGGGTCCCTGACCGATTCAGTGGCAGCGGGTCTGGGACAGATTTCACTCTCACCATCAACAGCCTGCAGGCTGAAGATGTGGCGGTTTATTACTGTCAGCAATATTATGATACCCCGGTCACGTTCGGTGGTGGAACCAAGCTG
				6	IGKV8-30*01	IGKJ5*01	79.3	GATACCCCGG	Yes	GACATTGTGATCACCCAATCTACAGACTCCCTGGTTGTGTCTCTGGGCGAGAGGGCCTCCATCAACTGCAAGTCCAGTCAGAGAGTTTCACTCGGCTCCAACAATAAGAACTACTTAGCTTGGTATCAGCACCAACCAGGACAGCCTCCTAGGCTGCTCATTTACTGGGCATCTACCCGGGAATCCGGGGTCCCTGACCGATTCAGTGGCAGCGGGTCTGGGACAGATTTCACTCTCACCATCAACAGCCTGCAGGCTGAAGATGTGGCGGTTTATTACTGTTAGCAATATTATGATACCCCGGTCACGTTCGGTGGTGGAACCAACCTG
				7	IGKV8-30*01	IGKJ5*01	79.6	GATACCCCGG	Yes	GATATTGTGCTCACCCAGACTCCAGCCTCCCTGGTTGTGTCTCTGGGCGAGAGGGCCTCCATCAACTGCAAGTCCAGTCAGAGAGTTTCACTCGGCTCCAACAATAAGAACTACTTAGCTTGGTATCAGCACCAACCAGGACAGCCTCCTAGGCTGCTCATTTACTGGGCATCTACCCGGGAATCCGGGGTCCCTGACCGATTCAGTGGCAGCGGGTCTGGGACAGATTTCACTCTCACCATCAACAGCCTGCAGGCTGAAGATGTGGCGGTTTATTACTGTCAGCAATATTATGATACCCCGGTCACGTTCGGCGGTGGAACCAA
			7	1	IGKV14-111*01	IGKJ2*01	95.8	\	Yes	GACATTGTGATGACACAGACTCCATCTTCCATGTATGCATCTCTAGGGGAGAGAGTCACTATCACTTGCAAGGCGAGTCAGGACATTAATAGCTATTTAAGCTGGTTCCAGCAGAAACCAGGGAAATCTCCTAAGACCCTGATCTATCGTGCGAACAGATTGGTAGATGGGGTCCCATCAAGGCTGAGTGGCAGTGGATCTGGGCAAGATTATTCTCTCACCATCAGCAGCCTGGAGGATGAAGATATGGGAATTTATTCTTGTCTACAGTATGATGAATTTCCGTACACGTTCGGTGGTGGAACCAA
				2	IGKV14-111*01	IGKJ2*01	97.1	\	Yes	ACCCAGTCTACATCTTCCATGTATGCATCTCTAGGGGAGAGAGTCACTATCACTTGCAAGGCGAGTCAGGACATTAATAGCTATTTAAGCTGGTTCCAGCAGAAACCAGGGAAATCTCCTAAGACCCTGATCTATCGTGCGAACAGATTGGTAGATGGGGTCCCATCAAGGCTGAGTGGCAGTGGATCTGGGCAAGATTATTCTCTCACCATCAGCAGCCTGGAGGATGAAGATATGGGAATTTATTCTTGTCTACAGTATGATGAATTTCCGTACACGTTCGGCGGTGGAACCAAGCTG
				3	IGKV14-111*01	IGKJ2*01	96.7	\	Yes	TGACCCAGACTCCATCTTCCATGTATGCATCTCTAGGGGAGAGAGTCACTATCACTTGCAAGGCGAGTCAGGACATTAATAGCTATTTAAGCTGGTTCCAGCAGAAACCAGGGAAATCTCCTAAGACCCTGATCTATCGTGCGAACAGATTGGTAGATGGGGTCCCATCAAGGCTGAGTGGCAGTGGATCTGGGCAAGATTATTCTCTCACCATCAGCAGCCTGGAGGATGAAGATATGGGAATTTATTCTCGTCTACAGTATGATGAATTTCCGTACACGTTCGGCGGTGGAACCAATCTG
				4	IGKV14-111*01	IGKJ2*01	97.1	\	Yes	GATGACCCAGACTCCATCTTCCATGTATGCATCTCTAGGGGAGAGAGTCACTATCACTTGCAAGGCGAGTCAGGACATTAATAGCTATTTAAGCTGGTTCCAGCAGAAACCAGGGAAATCTCCTAAGACCCTGATCTATCGTGCGAACAGATTGGTAGATGGGGTCCCATCAAGGCTGAGTGGCAGTGGATCTGGGCAAGATTATTCTCTCACCATCAGCAGCCTGGAGGATGAAGATATGGGAATTTATTCTTGTCTACAGTATGATGAATTTCCGTACACGTTCGGTGGTGGAACCAACCTG
				5	IGKV14-111*01	IGKJ2*01	96.7	\	Yes	ACCCAGACTACATCTTCCATGTATGCATCTCTAGGGGAGAGAGTCACTATCACTTGCAAGGCGAGTCAGGACATTAATAGCTATTTAAGCTGGTTCCAGCAGAAACCAGGGAAATCTCCTAAGACCCTGATCTATCGTGCGAACAGATTGGTAGATGGGGTCCCATCAAGGCTGAGTGGCAGTGGATCTGGGCAAGATTATTCTCTCACCATCAGCAGCCTGGAGGATGAAGATATGGGAATTTATTCTTGTCTACAGTATGATGAATTTCCGTACACGTTCGGCGGTGGAACCAACCTG
				6	IGKV14-111*01	IGKJ2*01	97.1	\	Yes	TGACCCAGTCTACATCTTCCATGTATGCATCTCTAGGGGAGAGAGTCACTATCACTTGCAAGGCGAGTCAGGACATTAATAGCTATTTAAGCTGGTTCCAGCAGAAACCAGGGAAATCTCCTAAGACCCTGATCTATCGTGCGAACAGATTGGTAGATGGGGTCCCATCAAGGCTGAGTGGCAGTGGATCTGGGCAAGATTATTCTCTCACCATCAGCAGCCTGGAGGATGAAGATATGGGAATTTATTCTTGTCTACAGTATGATGAATTTCCGTACACGTTCGGCGGTGGAACCAATCTG
				7	IGKV14-111*01	IGKJ2*01	96.4	\	Yes	TGACCCAGACTCCATCTTCCATGTATGCATCTCTAGGGGAGAGAGTCACTATCACTTGCAAGGCGAGTCAGGACATTAATAGCTATTTAAGCTGGTTCCAGCAGAAACCAGGGAAATCTCCTAGGACCCTGATCTATCGTGCGAACAGATTGGTAGATGGGGTCCCGTCAAGGCTGAGTGGCAGTGGATCTGGGCAAGATTATTCTCTCACCATCAGCAGCCTGGAGGATGAAGATATGGGAATTTATTCTTGTCTACAGTATGATGAATTTCCGTACACGTTCGGTGGTGGAACCAA
				8	IGKV14-111*01	IGKJ2*01	95.1	\	Yes	GACATTGTGCTGACACAAACTCCATCTTCCATGTATGCATCTCTAGGGGAGAGAGTCACTATCACTTGCAAGGCGAGTCAGGACATTAATAGCTATTTAAGCTGGTTCCAGCAGAAACCAGGGAAATCTCCTAAGACCCTGATCTATCGTGCGAACAGATTGGTAGATGGGGTCCCATCAAGGCTGAGTGGCAGTGGATCTGGGCAAGATTATTCTCTCACCATCAGCAGCCTGGAGGATGAAGATATGGGAATTTATTCTTGTCTACAGTATGATGAATTTCCGTACACGTTCGGCGGTGGAACCAA
				9	IGKV14-111*01	IGKJ2*01	95.8	\	Yes	GACATTGTGCTGACCCAGACTCCATCTTCCATGTATGCATCTCTAGGGGAGAGAGTCACTATCACTTGCAAGGCGAGTCAGGACATTAATAGCTATTTAAGCTGGTTCCAGCAGAAACCAGGGAAATCTCCTAAGACCCTGATCTATCGTGCGAACAGATTGGTAGATGGGGTCCCATCAAGGCTGAGTGGCAGTGGATCTGGGCAAGATTATTCTCTCACCATCAGCAGCCTGGAGGATGAAGATATGGGAATTTATTCTTGTCTACAGTATGATGAATTTCCGTACACGTTCGGCGGTGGAACCAA
				10	IGKV14-111*01	IGKJ2*01	96	\	Yes	GATGACACAGACTACATCTTCCATGTATGCATCTCTAGGGGAGAGAGTCACTATCACTTGCAAGGCGAGTCAGGACATTAATAGCTATTTAAGCTGGTTCCAGCAGAAACCAGGGAAATCTCCTAAGACCCTGATCTATCGTGCGAACAGATTGGTAGATGGGGTCCCATCAAGGCTGAGTGGCAGTGGATCTGGGCAAGATTATTCTCTCACCATCAGCAGCCTGGAGGATGAAGATATGGGAATTTATTCTTGTCTACGGTATGATGAATTTCCGTACACGTTCGGTGGTGGAACCAA
			8	1	IGKV9-120*01	IGKJ1*01	97.2	\	Yes	GACATTGTGCTCACCCAGTCTCCATCCTCCTTATCTGCCTCTCTGGGAGAAAGAGTCAGTCTCACTTGTCGGGCAAGTCAGGACATTGGTAGTAGCTTAAACTGGCTTCAGCAGGAACCAGATGGAACTATTAAACGCCTGATCTACGCCACATCCAGTTTAGATTCTGGTGTCCCCAAAAGGTTCAGTGGCAGTAGGTCTGGGTCAGATTATTCTCTTACCATCAGCAGCCTTGAGCCTGAAGATTTTGTAGACTATTACTGTCTACAATATGCTAGTTCTCCGTGGACGTTCGGCGGTGGAACCAA
				2	IGKV9-120*01	IGKJ1*01	96.8	\	Yes	GACATTGTGATCACACAATCTACATCCTCCTTATCTGCCTCTCTGGGAGAAAGAGTCAGTCTCACTTGTCGGGCAAGTCAGGACATTGGTAGTAGCTTAAACTGGCTTCAGCAGGAACCAGATGGAACTATTAAACGCCTGATCTACGCCACATCCAGTTTAGATTCTGGTGTCCCCAAAAGGTTCAGTGGCAGTAGGTCTGGGTCAGATTATTCTCTCACCATCAGCAGCCTTGAGCCTGAAGATTTTGTAGACTATTACTGTCTACAATATGCTAGTTCTCCGTGGACGTTCGGCGGTGGAACCAAGCTG
				3	IGKV9-120*01	IGKJ1*01	97.5	\	Yes	GACATTGTGATGACCCAGTCTACATCCTCCTTATCTGCCTCTCTGGGAGAAAGAGTCAGTCTCACTTGCCGGGCAAGTCAGGACATTGGTAGTAGCTTAAACTGGCTTCAGCAGGAACCAGATGGAACTATTAAACGCCTGATCTACGCCACATCCAGTTTAGATTCTGGTGTCCCCAAAAGGTTCAGTGGCAGTAGGTCTGGGTCAGATTATTCTCTCACCATCAGCAGCCTTGAGCCTGAAGATTTTGTAGACTATTACTGTCTACAATATGCTAGTTCTCCGTGGACGTTCGGTGGTGGAACCAAGCTG
				4	IGKV9-120*01	IGKJ2*01	96.1	\	Yes	GACATTGTGATCACCCAGACTACATCCTCCTTATCTGCCTCTCTGGGGGAAAGAGTCAGTCCCACTTGTCAGGCAAGTCAGGACATTGGTAGTAGCTTAAACTGGCTTCAGCAGGAACCAGATGGAACTATTAAACGCCTGATCTACGCCACATCCAGTTTAGATTCTGGTGTCCCCAAAAGGTTCAGTGGCAGTAGGTCTGGGTCAGATTATTCTCTCACCATCAGCCGCCTTGAGTCTGAAGATTTTGTAGACTATTACTGTCTACAATATGCTAGTTCTCCGTACACGTTCGGTGGTGGAACCAAACTG
				5	IGKV9-120*01	IGKJ1*01	97.8	\	Yes	GATCACCCAGTCTCCATCCTCCTTATCTGCCTCTCTGGGGGAAAGAGTCAGTCCCACTTGTCAGGCAAGTCAGGACATTGGTAGTAGCTTAAACTGGCTTCAGCAGGAACCAGATGGAACTATTAAACGCCTGATCTACGCCACATCCAGTTTAGATTCTGGTGTCCCCAAAAGGTTCAGTGGCAGTAGGTCTGGGTCAGATTATTCTCTCACCATCAGCAGCCTTGAGTCTGAAGATTTTGTAGACTATTACCGTCTACAATATGCTAGTTCTCCGTGGACGTTCGGCGGTGGAACCAACCTG
				6	IGKV9-120*01	IGKJ2*01	97.4	\	Yes	ACACAGACTACATCCTCCTTATCTGCCTCTCTGGGGGAAAGAGTCAGTCCCACTTGTCAGGCAAGTCAGGACATTGGTAGTAGCTTAAACTGGCTTCAGCAGGAACCAGATGGAACTATTAAACGCCTGATCTACGCCACATCCAGTTTAGATTCTGGTGTCCCCAAAAGGTTCAGTGGCAGTAGGTCTGGGTCAGATTATTCTCTCACCATCAGCAGCCTTGAGTCTGAAGATTTTGTAGACTATTACTGTCTACAATATGCTAGTTCTCCGTACACGTTCGGTGGTGGGACCAAGCTG
		WT-6	1	1	IGKV14-100*01	IGKJ2*01	98.6	\	Yes	GACATTGTGCTGACCCAATCTCCATCCTCCATGTCTGTATCTCTGGGAGACACAGTCAGCATCACTTGCCATGCAAGTCAGGGCATTAGCAGTAATATAGGGTGGTTGCAGCAGAAACCAGGGAAATCATTTAAGGGCCTGATCTATCATGGAACCAACTTGGAAGATGAAGTTCCATCAAGGTTCAGTGGCAGTGGATCTGGAGCAGATTATTCTCTCACCATCAGCAGCCTGGAATCTGAAGATTTTGCAGACTATTACTGTGTACAGTATGCTCAGTTTCCGTACACGTTCGGC
				2	IGKV17-121*01	IGKJ2*01	98.6	\	Yes	GATATTGTGATGACACAGACTACAGCATCCCTGTCCATGGCTATAGGAGAAAAAGTCACCATCAGATGCATAACCAGCACTGATATTGATGATGATATGAACTGGTACCAGCAGAAGCCAGGGGAACCTCCTAAGTTCCTTATTTCAGAAGGCAATACTCTTCGTCCTGGAGTCCCATCCCGATTCTCCAGCAGTGGCTATGGTACAGATTTTGTTTTTACAATTGAAAACATGCTCTCAGAAGATGTTGCAGATTACTACTGTTTGCAAAGTGATAACTTGCCTCTGTACACGTTCGGTGGTGGAACCAATCTG
				3	IGKV17-121*01	IGKJ2*01	98.9	\	Yes	GACATTGTGCTCACACAGTCTACAGCATCCCTGTCCATGGCTATAGGAGAAAAAGTCACCATCAGATGCATAACCAGCACTGATATTGATGATGATATGAACTGGTACCAGCAGAAGCCAGGGGAACCTCCTAAGTTCCTTATTTCAGAAGGCAATACTCTTCGTCCTGGAGTCCCATCCCGATTCTCCAGCAGTGGCTATGGTACAGATTTTGTTTTTACAATTGAAAACATGCTCTCAGAAGATGTTGCAGATTACTACTGTTTGCAAAGTGATAACTTGCCTCTGTACACGTTCGGTGGTGGAACCAAGCTG
				4	IGKV14-100*01	IGKJ2*01	99.3	\	Yes	CCCAAACTCCATCCTCCATGTCTGTATCTCTGGGAGACACAGTCAGCATCACTTGCCATGCAAGTCAGGGCATTAGCAGTAATATAGGGTGGTTGCAGCAGAAACCAGGGAAATCATTTAAGGGCCTGATCTATCATGGAACCAACTTGGAAGATGAAGTTCCATCAAGGTTCAGTGGCAGTGGATCTGGAGCAGATTATTCTCTCACCATCAGCAGCCTGGAATCTGAAGATTTTGCAGACTATTACTGTGTACAGTATGCTCAGTTTCCGTACACGTTCGGTGGTGGAACCAAGCTG
				5	IGKV14-100*01	IGKJ2*01	97.5	\	Yes	GATATTGTGCTGACCCAAACTCCATCCTCCATGTCTGTATCTCTGGGAGACACAGTCAGCATCACTTGCCATGCAAGTCAGGGCATTAGCAGTAATATAGGGTGGTTGCAGCAGAAACCAGGGAAATCATTTAAGGGCCTGATCTATTATGGAACCAACTTGGAAGATGAAGTTCCATCAAGGTTCAGTGGCAGTGGATCTGGAGCAGATTATTCTCTCACCATCAGCAGCCTGGAATCTGAAGATTTTGCAGACTATTACTGTGTACAGTATGCTCAGTTTCCGTACACGTTCGGCGGTGGAACCAATCTG
				6	IGKV14-100*01	IGKJ2*01	97.5	\	Yes	GACATTGTGATGACACAGACTCCATCCTCCATGTCTGTATCTCTGGGAGACACAGTCAGCATCACTTGCCATGCAAGTCAGGGCATTAGCAGTAATATAGGGTGGTTGCAGCAGAAACCAGGGAAATCATTTAAGGGCCTGATCTGTCATGGAACCAACTTGGAAGATGAAGTTCCATCAAGGTTCAGTGGCAGTGGATCTGGAGCAGATTATTCTCTCACCATCAGCAGCCTGGAATCTGAAGATTTTGCAGACTATTACTGTGTACAGTATGCTCAGTTTCCGTACACGTTCGGCGGTGGAACCAATCTG
				7	IGKV14-100*01	IGKJ2*01	97.2	\	Yes	GATATTGTGCTGACACAAACTACATCCTCCATGTCTGTATCTCTGGGAGACACAGTCAGCATCACTTGCCATGCAAGTCAGGGCATTAGCAGTAATATAGGGTGGTTGCAGCAGAAACCAGGGAAATCATTTAAGGGCCTGATCTATCATGGAACCAACTTGGAAGATGAAGTTCCATCAAGGTTCAGTGGCAGTGGATCTGGAGCAGATTATTCTCTCACCATCAGCAGCCTGGAATCTGAAGATTTTGCAGACTATTACTGTGTACAGTATGCTCAGTTTCCGTACACGTTCGGTGGTGGAACCAA
				8	IGKV14-100*01	IGKJ2*01	98.6	\	Yes	GACATTGTGATCACCCAATCTCCATCCTCCATGTCTGTATCTCTGGGAGACACAGTCAGCATCACTTGCCATGCAAGTCAGGGCATTAGCAGTAATATAGGGTGGTTGCAGCAGAAACCAGGGAAATCATTTAAGGGCCTGATCTATCATGGAACCAACTTGGAAGATGAAGTTCCATCAAGGTTCAGTGGCAGTGGATCTGGAGCAGATTATTCTCTCACCATCAGCAGCCTGGAATCTGAAGATTTTGCAGACTATTACTGTGTACAGTATGCTCAGTTTCCGTACACGTTCGGCGGTGGAACCAA
				9	IGKV14-100*01	IGKJ2*01	98.2	\	Yes	GACATTGTGCTCACCCAATCTCCATCCTCCATGTCTGTATCTCTGGGAGACACAGTCAGCATCACTTGCCATGCAAGTCAGGGCATTAGCAGTAATATAGGGTGGTTGCAGCAGAAACCAGGGAAATCATTTAAGGGCCTGATCTATCATGGAACCAACTTGGAAGATGAAGTTCCATCAAGGTTCAGTGGCAGTGGATCTGGAGCAGATTATTCTCTCACCATCAGCAGCCTGGAATCTGAAGATTTTGCAGACTATTACTGTGTACAGTATGCTCAGTTTCCGTACACGTTCGGCA
			2	1	IGKV9-120*01	IGKJ2*01	98.2	\	Yes	TGACCCAGTCTCCATCCTCCTTATCTGCCTCTCTGGGAGAAAGAGTCAGTCCCACTTGTCAGGCAAGTCAGGACATTGGTGGTAGCTTAAACTGGCTTCAGCAGGAACCAGATGGAACTATTAAACGCCTGATCTACGCCACATCCAGTTTAGATTCTGGTGTCCCCAAAAGGTTCAGTGGCAGTAGGTCTGGGTCAGATTATTCTCTCACCATCAGCTGCCTTGAGTCTGAAGATTTTGTAGACTATTACTGTCTACAATATGCTAGTTCTCCGTACACGTTCGGCGGTGGAACCAA
				2	IGKV9-120*01	IGKJ2*01	96.5	\	Yes	GACATTGTGATCACCCAGACTCCATCCTCCTTATCTGCCTCTCTGGGAGAAGGAGTCAGTCCCACTTGTCAGGCAAGTCAGGACATTGGTAGTAGCTTAAACTGGCTTCAGCAGGAACCAGATGGAACTATTAAACGCCTGATCTACGCCACATCCAGTTTAGATTCTGGTGTCCCCAAAAGGTTCAGTGGCAGTAGGTCTGGGTCAGATTATTCTCTCACCATCAGCGGCCTTGAGTCTGAAGATTTTGTAGACTATTACTGTCTACAATATGCTAGTTCTCCGTACACGTTCGGTGGTGGAACCAACCTG
				3	IGKV9-120*01	IGKJ2*01	97.2	\	Yes	GACATTGTGCTGACCCAGTCTCCATCCTCCTTATCTGCCTCTCTGGGAGAAAGAGTCAGTCCCACTTGTCAGGCAAGTCAGGACATTGGTAGTAGCTTAAACTGGCTTCAGCAGGAACCAGATGGAACTATTAAACGCCTGATCTACGCCACATCCAGTTTAGATTCTGGTGTCCCCAAAAGGTTCAGTGGCAGTAGGTCTGGGTCAGATTATTCTCTCACCATCAGCGGCCTTGAGTCTGAAGATTTTGTAGACTATTACTGTCTACAATATGCTAGTTCTCCGTACACGTTCGGCGGTGGAACCAACCTG
				4	IGKV9-120*01	IGKJ2*01	96.1	\	Yes	GACATTGTGCTGACACAGTCTCCATCCTCCTTATCTGCCTCTCTGGGAGAAAGAGTCAGTCCCACTTGTCAGGCAAGTCAGGACATTGGTAGTAGCTTAAACTGACTTCAGCAGGAACCAGATGGAACCATTAAACGCCTGATCTACGCCACATCCAGTTTAGATTCTGGTGTCCCCAAAAGGTTCAGTGGCAGTAGGTCTGGGTCAGATTATTCTCTCACCATCAGCAGCCTTGAGTCTGAGGATTTTGTAGACTATTACTGTCTACAATATGCTAGTTCTCCGTACACGTTCGGTGGTGGAACCAACCTG
				5	IGKV9-120*01	IGKJ2*01	98.5	\	Yes	TGACCCAGTCTACATCCTCCTTATCTGCCTCTCTGGGAGAAAGAGTCAGTCCCACTTGTCAGGCAAGTCAGGACATTGGTAGTAGCTTAAACTGGCTTCAGCAGGAACCAGATGGAACTATTAAACGCCTGATCTACGCCACATCCAGTTTAGATTCTGGTGTCCCCAAAAGGTTCAGTGGCAGTAGGTCTGGGTCAGATTATTCTCTCACCATCAGCAGCCTTGAGTCTGAAGATTTTGTAGACTATTACTGTCTACAATATGCTAGTTCTCCGTACACGTTCGGCGGTGGAACCAAGCTG
				6	IGKV9-120*01	IGKJ2*01	96.5	\	Yes	GACATTGTGCTGACCCAATCTACATCCTCCTTATCTGCCTCTCTGGGAGAAAGAGTCAGTCCCACTTGTCAGGCAAGTCAGGACATTGGTAGTAGCTTAAACTGGCTTCAGCAGGAACCAGATGGAACTATTAAACGCCTGATCTACGCCACATCCAGTTTAGATTCTGGTGTCCCCAAAAGGTTCAGTGGCAGTAGGCCTGGGTCAGATTATTCTCTCACCATCAGCAGCCTTGAGTCTGAAGATTTTGTAGACTATTACTGTCTACAATATGCTAGTTCTCCGTACACGTTCGGTGGTGGAACCAAGCTG
				7	IGKV9-120*01	IGKJ2*01	97.8	\	Yes	TGACCCAGACTCCATCCTCCTTATCTGCCTCTCTGGGAGAAAGAGTCAGTCCCGCTTGTCAGGCAAGTCGGGACATTGGTAGTAGCTTAAACTGGCTTCAGCAGGAACCAGATGGAACTATTAAACGCCTGATCTACGCCACATCCAGTTTAGATTCTGGTGTCCCCAAAAGGTTCAGTGGCAGTAGGTCTGGGTCAGATTATTCTCTCACCATCAGCAGCCTTGAGTCTGAAGATTTTGTAGACTATTACTGTCTACAATATGCTAGTTCTCCGTACACGTTCGGCGGTGGAACCAA
				8	IGKV9-120*01	IGKJ2*01	96.5	\	Yes	GACATTGTGATGACACAATCTACATCCTCCTTATCTGCCTCTCTGGGAGAAAGAGTCAGTCCCACTTGTCAGGCAAGTCAGGACACTGGTAGTAGCTTAAACTGGCTTCAGCAGGAACCAGATGGAACTATTAAACGCCTGATCTACGCCACATCCAGTTTAGATTCTGGTGTCCCCAAAAGGTTCAGTGGCAGTAGGTCTGGGTCAGATTATTCTCTCACCATCAGCAGCCTTGAGTCTGAAGATTTTGTAGACTATTACTGTCTACAATATGCTAGTTCTCCGTACACGTTCGGTGGTGGAACCAA
			3	1	IGKV9-120*01	IGKJ2*01	95.1	\	Yes	GATATTCTGCTGACACAAACTCCATCCTCCTTATCCGCCTCTCTGGGAGAAAGAGTCAGTCTCACTTGTCAGGCAAGTCGGGACATTGGTAGTAGCTTAAACTGGCTTCAGCAGGAACCACCAGATGGAACTATTAAACGCCTGATCTACGCCACATCCAGTTTAGATTCTGGTGTCCCCAAAAGGTTCAGTGGCAGTAGGTCTGGGTCAGATTATTCTCTCACCATCAGCAGCCTTGAGTCTGAAGATTTTGTAGACTATTACTGTCTACAATATGCTAGTTCTCCGTACACGTTCGGCGGTGGAACCAAGCT
				2	IGKV9-120*01	IGKJ2*01	97.2	\	Yes	GACATTGTGCTCACCCAGACTACATCCTCCTTATCTGCCTCTCTGGGAGAAAGAGTCAGTCTCACTTGTCGGGCAAGTCAGGACATTGGTAGTAGCTTAAACTGGCTTCAGCAGGAACCAGATGGAACTATTAAACGCCTGATCTACGCCACATCCAGTTTAGATTCTGGTGTCCCCAAAAGGTTCAGTGGCAGTAGGTCTGGGTCAGATTATTCTCTCACCATCAGCAGCCTTGAGTCTGAAGATTTTGTAGACTATTACTGTCTACAATATGCTAGTTCTCCGTACACGTTCGGTGGTGGAACCAACCTG
				3	IGKV9-120*01	IGKJ2*01	97.2	\	Yes	GACATTGTGCTGACCCAAACTCCATCCTCCTTATCTGCCTCTCTGGGAGAAAGAGTCAGTCTCACTTGTCAGGCAAGTCAGGACATTGGTAGTAGCTTAAACTGGCTTCAGCAGGAACCAGATGGAACTATTAAACGCCTGATCTACGCCACATCCAGTTTAGATTCTGGTGTCCCCAAAAGGTTCAGTGGCAGTAGGTCTGGGTCAGATTATTCTCTCACCATCAGCAGCCTTGAGTCTGAAGATTTTGTAGACTATTACTGTCTACAATATGCTAGTTCTCCGTACACGTTCGGTGGTGGAACCAACCTG
				4	IGKV9-120*01	IGKJ2*01	99.3	\	Yes	GATGACCCAGTCTCCATCCTCCTTATCTGCCTCTCTGGGAGAAAGAGTCAGTCTCACTTGTCAGGCAAGTCAGGACATTGGTAGTAGCTTAAACTGGCTTCAGCAGGAACCAGATGGAACTATTAAACGCCTGATCTACGCCACATCCAGTTTAGATTCTGGTGTCCCCAAAAGGTTCAGTGGCAGTAGGTCTGGGTCAGATTATTCTCTCACCATCAGCAGCCTTGAGTCTGAAGATTTTGTAGACTATTACTGTCTACAATATGCTAGTTCTCCGTACACGTTCGGCGGTGGAACCAA
				5	IGKV9-120*01	IGKJ2*01	97.5	\	Yes	GACATTGTGCTGACCCAGACTCCATCCTCCTTATCTGCCTCTCTGGGAGAAAGAGTCAGTCTCACTTGTCAGGCAAGTCAGGACATTGGTAGTAGCTTAAACTGGCTTCAGCAGGAACCAGATGGAACTATTAAACGCCTGATCTACGCCACATCCAGTTTAGATTCTGGTGTCCCCAAAAGGTTCAGTGGCAGTAGGTCTGGGTCAGATTATTCTCTCACCATCAGCAGCCTTGAGTCTGAAGATTTTGTAGACTATTACTGTCTACAATATGCTAGTTCTCCGTACACGTTCGGCGGTGGAACCAA
				6	IGKV9-120*01	IGKJ2*01	98.6	\	Yes	GATGACACAGTCTCCATCCTCCTTATCTGCCTCTCTGGGAGAAAGAGTCAGTCTCACTTGTCAGGCAAGTCAGGACATTGGTAGTAGCTTAAACTGGCTTCAGCAGGAACCAGATGGAACTATTAAACGCCTGATCTACGCCACATCCAGTTTAGATTCTGGTGTCCCCAAAAGGTTCAGTGGCAGTGGGTCTGGGTCAGATTATTCTCTCACCATCAGCAGCCTTGAGTCTGAAGATTTTGTAGACTATTACTGTCTACAATATGCTAGTTCTCCGTACACGTTCGGCGGTGGAACCAAGCT
			4	1	IGKV17-121*01	IGKJ2*01	98.9	\	Yes	TGACCCAAACTCCAGCATCCCTGTCCATGGCTATAGGAGAAAAAGTCACCATCAGATGCATAACCAGCACTGATATTGATGATGATATGAACTGGTACCAGCAGAAGCCAGGGGAACCTCCTAAGTTCCTTATTTCAGAAGGCAATACTCTTCGTCCTGGAGTCCCATCCCGATTCTCCAGCAGTGGCTATGGTACAGATTTTGTTTTTACAATTGAAAACATGCTCTCAGAAGATGTTGCAGATTACTACTGTTTGCAAAGTGATAACTTGCCTCTGTACACGTTCGGTGGTGGAACCAAGCT
				2	IGKV17-121*01	IGKJ2*01	99.3	\	Yes	TGACACAGTCTCCAGCATCCCTGTCCATGGCTATAGGAGAAAAAGTCACCATCAGATGCATAACCAGCACTGATATTGATGATGATATGAACTGGTACCAGCAGAAGCCAGGGGAACCTCCTAAGTTCCTTATTTCAGAAGGCAATACTCTTCGTCCTGGAGTCCCATCCCGATTCTCCAGCAGTGGCTATGGTACAGATTTTGTTTTTACAATTGAAAACATGCTCTCAGAAGATGTTGCAGATTACTACTGTTTGCAAAGTGATAACTTGCCTCTGTACACGTTCGGCGGTGGAACCAAGCTG
				3	IGKV17-121*01	IGKJ2*01	98.6	\	Yes	TGACACAGTCTACAGCATCCCTGTCCATGGCTATAGGAGAAAAAGTCACCATCAGATGCATAACCAGCACTGATATTGATGATGATATGAACTGGTACCGGCAGAAGCCAGGGGAACCTCCTAAGTTCCTTATTTCAGAAGGCAATACTCTTCGTCCTGGAGTCCCATCCCGATTCTCCAGCAGTGGCTATGGTACAGATTTTGTTTTTACAATTGAAAACATGCTCTCAGAAGATGTTGCAGATTACTACTGTTTGCAAAGTGATAACTTGCCTCTGTACACGTTCGGCGGTGGAACCAA
				4	IGKV17-121*01	IGKJ2*01	98.9	\	Yes	ACCCAGTCTCCAGCATCCCTGTCCATGGCTATAGGAGAAAAAGTCACCATCAGATGCATAACCAGCACTGATATTGATGATGATATGAACTGGTACCAGCAGAAGCCAGGGGAACCTCCTAAGTTCCTTATTTCAGAAGGCAATACTCTTCGTCCTGGAGTCCCACCCCGATTCTCCAGCAGTGGCTATGGTATAGATTTTGTTTTTACAATTGAAAACATGCTCTCAGAAGATGTTGCAGATTACTACTGTTTGCAAAGTGATAACTTGCCTCTGTACACGTTCGGTGGTGGAACCAATCTG
				5	IGKV17-121*01	IGKJ2*01	99.3	\	Yes	ACCCAGTCTCCAGCATCCCTGTCCATGGCTATAGGAGAAAAAGTCACCATCAGGTGCATAACCAGCACTGATATTGATGATGATATGAACTGGTACCAGCAGAAGCCAGGGGAACCTCCTAAGTTCCTTATTTCAGAAGGCAATACTCTTCGTCCTGGAGTCCCATCCCGATTCTCCAGCAGTGGCTATGGTACAGATTTTGTTTTTACAATTGAAAACATGCTCTCAGAAGATGTTGCAGATTACTACTGTTTGCAAAGTGATAACTTGCCTCTGTACACGTTCGGCGGTGGAACCAAACTG
				6	IGKV17-121*01	IGKJ2*01	98.9	\	Yes	TGACCCAAACTCCAGCATCCCTGTCCATGGCTATAGGAGAAAAAGTCACCATCAGATGCATAACCAGCACTGATATTGATGATGATATGAACTGGTACCAGCAGAAGCCAGGGGAACCTCCTAAGTTCCTTATTTCAGAAGGCAATACTCTTCGTCCTGGAGTCCCATCCCGATTCTCCAGCAGTGGCTATGGTACAGATTTTGTTTTTACAATTGAAAACATGCTCTCAGAAGATGTTGCAGATTACTACTGTTTGCAAAGTGATAACTTGCCTCTGTACACGTTCGGTGGTGGAACCAAGCT
			5	1	IGKV9-120*01	IGKJ2*01	97.4	CAGTTTCC	Yes	GATGACCCAATCTACATCCTCCTTATCTGCCTCTCTGGGAGAAAGAGTCAGTCTCACTTGTCGGGCAAGTCAGGACATTGGTAGTAGCTTAAACTGGCTTCAGCAGGAACCAGATGGAACTATTAAACGCCTGATCTACGCCACATCCAGTTTAGATTCTGGTGTCCCCAAAGGGTTCAGTGGCAGTAGGTCTGGGTCAGATTATTCTCTCACCATCAGCAGCCTTGAGTCTGAAGATTTTGCAGACTATTACTGTGTACAGTATGCTCAGTTTCCGTACACGTTCGGTGGTGGAACCAA
				2	IGKV14-100*01	IGKJ2*01	97.2	\	Yes	GATATTGTGATCACCCAGACTACATCCTCCATGTCTATATCTCTGGGAGACACAGTCAGCATCACTTGCCATGCAAGTCAGGGCATTAGCAGTAATATAGGGTGGTTGCAGCAGAAACCAGGGAAATCATTTAAGGGCCTGATCTATCATGGAACCAACTTGGAAGATGGAGTTCCATCAAGGTTCAGTGGCAGTGGATCTGGAGCAGATTATTCTCTCACCATCAGCAGCCTGGAATCTGAAGATTTTGCAGACTATTACTGTGTACAGTATGCTCAGTTTCCGTACACGTTCGGTGGTGGAACCAAGCT
				3	IGKV9-120*01	IGKJ2*01	96.7	\	Yes	GACATTGTGATCACCCAGTCTCCATCCTCCTTATCTGCCTCTCTGGGAGAAAGAGTCAGTCTCACTTGTCGGGCAAGTCAGGACATTGGTAGTAGCTTAAACTGGCTTCAGCAGGAACCAGATGGAACTATTAAACGCCTGATCTACGCCACATCCAGTTTAGATTCTGGTGTCCCCAAAGGGTTCAGTGGCAGTAGGTCTGGGTCAGATTATTCTCTCACCATCAGCAGCCTTGAGTCTGAAGATTTTGCAGACTATTACTGTGTACAGTATGCTCAGTTTCCGTACACGTTCGGTGGTGGAACCAAGCT
				4	IGKV9-120*01	IGKJ2*01	97.8	\	Yes	GATCACCCAGTCTCCATCCTCCTTATCTGCCTCTCTGGGAGAAAGAGTCAGTCTCACTTGTCGGGCAAGTCAGGACATTGGTAGTAGCTTAAACTGGCTTCAGCAGGAACCAGATGGAACTATTAAACGCCTGATCTACGCCACATCCAGTTTAGATTCTGGTGTCCCCAAAGGGTTCAGTGGCAGTAGGTCTGGGTCAGATTATTCTCTCACCATCAGCAGCCTTGAGTCTGAAGATTTTGCAGACTATTACTGTGTACAGTATGCTCAGTTTCCGTACACGTTCGGTGGTGGAACCAA
				5	IGKV14-100*01	IGKJ2*01	97.2	\	Yes	GATATTGTGCTGACCCAGACTCCATCCTCCATGTCTATATCTCTGGGAGACACAGTCAGCATCACTTGCCATGCAAGTCAGGGCATTAGCAGTAATATAGGGTGGTTGCAGCAGAAACCGGGGAAATCATTTAAGGGCCTGATCTATCATGGAACCAACTTGGAAGATGGAGTTCCATCAAGGTTCAGTGGCAGTGGATCTGGAGCAGATTATTCTCTCACCATCAGCAGCCTGGAATCTGAAGATTTTGCAGACTATTACTGTGTACAGTATGCTCAGTTTCCGTACACGTTCGGTGGTGGAACCAA
			6	1	IGKV17-121*01	IGKJ2*01	98.9	\	Yes	TGACACAGTCTACAGCATCCCTGTCCATGGCTATAGGAGAAAAAGTCACCATCAGATGCATAACCAGCACTGATATTGATGATGATATGAACTGGTACCAGCAGAAGCCAGGGGAACCTCCTAAGTTCCTTATTTCAGAAGGCAATACTCTTCGTCCTGGAGTCCCATCCCGATTCTCCAGCAGTGGCTATGGTACAGATTTTGTTTTTACAATTGAAAACATGCTCTCAGAAGATGTTGCAGATTACTACTGTTTGCAAAGTGATAACTTGCCTCTGTACACGTTCGGCGGTGGAACCAA
				2	IGKV17-121*01	IGKJ2*01	97.8	\	Yes	TGACACAGTCTACAGCATCCCTGTCCATGGCTATAGGAGAAAAAGTCACCATCAGATGCATAACCAGCACTGATATCGATGATGATATGAACTGGTACCAGCAGAAGCCAGGGGAACCCCCTAAGTTCCTTATTTCAGAAGGCAATACTCTTCGTCCTGGAGTCCCATCCCGATTCTCCAGCAGTGGCTATGGTACAGATTTTGTTTTTACAATTGAAAACATGCTCTCAGAAGATGTTGCAGATTACTACTGTTTGCAAAGTGATGACTTGCCTCTGTACACGTTCGGCGGTGGAACCAAACTG
				3	IGKV17-121*01	IGKJ2*01	99.3	\	Yes	TGACCCAGACTCCAGCATCCCTGTCCATGGCTATAGGAGAAAAAGTCACCATCAGATGCATAACCAGCACTGATATTGATGATGATATGAACTGGTACCAGCAGAAGCCAGGGGAACCTCCTAAGTTCCTTATTTCAGAAGGCAATACTCTTCGTCCTGGAGTCCCATCCCGATTCTCCAGCAGTGGCTATGGTACAGATTTTGTTTTTACAATTGAAAACATGCTCTCAGAAGATGTTGCAGATTACTACTGTTTGCAAAGTGATAACTTGCCTCTGTACACGTTCGGTGGTGGAACCAAGCTG
				4	IGKV17-121*01	IGKJ2*01	97.8	\	Yes	TGACACAATCTCCAGCATCCCTGTCCATGGCTATAGGAGAAAAAGTCACCATCAGATGCATAACCAGCACTGATATCGATGATGATATGAACTGGTACCAGCAGAAGCCAGGGGAACCTCCTAAGTTCCTTATTTCAGAAGGCAATACTCTTCGTCCTGGAGTCCCATCCCGATTCTCCAGCAGTGGCTATGGTACAGATTTTGCTTTTACAATCGAAAACATGCTCTCAGAAGATGTTGCAGATTACTACTGTTTGCAAAGTGATAACTTGCCTCTGTACACGTTCGGTGGTGGAACCAATCTG
				5	IGKV17-121*01	IGKJ2*01	99.3	\	Yes	TGACCCAGTCTCCAGCATCCCTGTCCATGGCTATAGGAGAAAAAGTCACCATCAGATGCATAACCAGCACTGATATTGATGATGATATGAACTGGTACCAGCTGAAGCCAGGGGAACCTCCTAAGTTCCTTATTTCAGAAGGCAATACTCTTCGTCCTGGAGTCCCATCCCGATTCTCCAGCAGTGGCTATGGTACAGATTTTGTTTTTACAATTGAAAACATGCTCTCAGAAGATGTTGCAGATTACTACTGTTTGCAAAGTGATAACTTGCCTCTGTACACGTTCGGTGGTGGAACCAACCTG
				6	IGKV17-121*01	IGKJ2*01	98.6	\	Yes	TGACCCAGTCTACAGCATCCCTGTCCATGGCTATAGGAGGAAAAGTCATCATCAGATGCATAACCAGCACTGATATTGATGATGATATGAACTGGTACCAGCAGAAGCCAGGGGAACCTCCTAAGTTCCTTATTTCAGAAGGCAATACTCTTCGTCCTGGAGTCCCATCCCGATTCTCCAGCAGTGGCTATGGTACAGATTTTGTTTTTACAATTGAAAACATGCTCTCAGAAGATGTTGCAGATTACTACTGTTTGCAAAGTGATAACTTGCCTCTGTACACGTTCGGCGGTGGAACCAAGCTG
				7	IGKV17-121*01	IGKJ2*01	98.2	\	Yes	TGACCCAGACTACAGCATCCCTGTCCATGGCTATAGGAGAAAAAGTCACCATCAGATGCATAACCAGCGCTGATATTGATGATGATATGAACTGGTACCAGCAGAAGCCAGGGGAACCTCCTAAGTTCCTTATTTCAGAAGGCAATACTCTTCGTCCTGGAGTCCCATCCCGATTCTCCAGCAGTGGCTATGGTACAGATTTTGTTTTTACAATTGAAAACATGCACTCAGAAGATGTTGCAGATTACTACTGTTTGCAAAGTGATAACTTGCCTCTGTACACGTTCGGTGGTGGAACCAA
				8	IGKV17-121*01	IGKJ2*01	99.6	\	Yes	ACCCAGTCTCCAGCATCCCTGTCCATGGCTATAGGAGAAAAAGTCACCATCAGATGCATAACCAGCACTGATATTGATGATGATATGAACTGGTACCAGCAGAAGCCAGGGGAACCTCCTAAGTTCCTTATTTCAGAAGGCAATACTCTTCGTCCTGGAGTCCCATCCCGATTCTCCAGCAGTGGCTATGGTACAGATTTTGTTTTTACAATTGAAAACATGCTCTCAGAAGATGTTGCAGATTACTACTGTTTGCAAAGTGATAACTTGCCTCTGTACACGTTCGGCGGTGGAACCAA
				9	IGKV17-121*01	IGKJ2*01	98.9	\	Yes	TGACACAGTCTACAGCATCCCTGTCCATGGCTATAGGAGAAAAAGTCACCATCAGATGCATAACCAGCACTGATATTGATGATGATATGAACTGGTACCAGCAGAAGCCAGGGGAACCTCCTAAGTTCCTTATTTCAGAAGGCAATACTCTTCGTCCTGGAGTCCCATCCCGATTCTCCAGCAGTGGCTATGGTACAGATTTTGTTTTTACAATTGAAAACATGCTCTCAGAAGATGTTGCAGATTACTACTGTTTGCAAAGTGATAACTTGCCTCTGTACACGTTCGGTGGTGGAACCAAGCT
				10	IGKV17-121*01	IGKJ2*01	98.6	\	Yes	TGACCCAGACTACAGCATCCCTGTCCATGGCTATAGGAGAAAAAGTCACCATCAGATGCATAACCAGCACTGATATTGATGATGATATGAACTGGTACCAACAGAAGCCAGGGGAACCTCCTAAGTTCCTTATTTCAGAAGGCAATACTCTTCGTCCTGGAGTCCCATCCCGATTCTCCAGCAGTGGCTATGGTACAGATTTTGTTTTTACAATTGAAAACATGCTCTCAGAAGATGTTGCAGATTACTACTGTTTGCAAAGTGATAACTTGCCTCTGTACACGTTCGGTGGTGGAACCAA
		WT-7	1	1	IGKV14-100*01	IGKJ2*01	97.9	\	Yes	GATATTGTGCTGACCCAAACTCCATCCTCCATGTCTGTATCTCTGGGAGACACAGTCAGCATCACTTGCCATGCAAGTCAGGGCATTAGCAGTAATATAGGGTGGTTGCAGCAGAAACCAGGGAAATCATTTAAGGGCCTGATCTATCATGGAACCAACTTGGAAGATGGAGTTCCATCAAGGTTCAGTGGCAGTGGATCTGGAGCAGATTATTCTCTCACCATCAGCAGCCTGGAATCTGAAGATTTTGCAGACTATTACTGTGTACTGTATGCTCAGTTTCCGTACACGTTCGGTGGTGGAACCAA
				2	IGKV14-100*01	IGKJ2*01	98.6	\	Yes	GACATTGTGATCACACAATCTCCATCCTCCATGTCTGTATCTCTGGGAGACACAGTCAGCATCACTTGCCATGCAAGTCAGGGCATTAGCAGTAATATAGGGTGGTTGCAGCAGAAACCAGGGAAATCATTTAAGGGCCTGATCTATCATGGAACCAACTTGGAAGATGGAGTTCCATCAAGGTTCAGTGGCAGTGGATCTGGAGCAGATTATTCTCTCACCATCAGCAGCCTGGAATCTGAAGATTTTGCAGACTATTACTGTGTACAGTATGCTCAGTTTCCGTACACGTTCGGCGGTGGAACCAAGCTG
				3	IGKV9-120*01	IGKJ1*01	97.2	\	Yes	GACATTGTGCTCACCCAGACTACATCCTCCTTATCTGCCTCTCTGGGAGAAAGAGTCAGTCTCACTTGTCGGGCAAGTCAGGACATTGGTAGTAGCTTAAACTGGCTTCAGCAGGAACCAGATGGAACTATTAAACGCCTGATCTACGCCACATCCAGTTTAGATTCTGGTGTCCCCAAAAGGTTCAGTGGCAGTAGGTCTGGGTCAGATTATTCTCTCACCATCAGCAGCCTTGAGTCTGAAGATTTTGTAGACTATTACTGTCTACAATATGCTAGTTCTCCGTGGACGTTCGGTGGTGGAACCAAACTG
				4	IGKV14-100*01	IGKJ1*01	98.5	\	Yes	TGACCCAATCTCCATCCTCCTTATCTGCCTCTCTGGGAGAAAGAGTCAGTCTCACTCGTCGGGCAAGTCAGGACATTGGTAGTAGCTTAAACTGGCTTCAGCAGGAACCAGATGGAACTATTAAACGCCTGATCTACGCCACATCCAGTTTAGATTCTGGTGTCCCCAAAAGGTTCAGTGGCAGTAGGTCTGGGTCAGATTATTCTCTCACCATCAGCAGCCTTGAGTCTGAAGATTTTGTAGACTACTACTGTCTACAATATGCTAGTTCTCCGTGGACGTTCGGTGGTGGAACCAAACTG
				5	IGKV14-100*01	IGKJ2*01	97.5	\	Yes	GATATTGTGCTCACACAAACTCCATCCTCCATGTCTGTATCTCTGGGAGACACAGTCAGCATCACTTGCCATGCAAGTCAGGGCATTAGCAGTAATATAGGGTGGTTGCAGCAGAAACCAGGGAAATCATTTAAGGGCCTGATCTATCATGGAACCAACTTGGAAGATGGAGTTCCATCAAGGTTCAGTGGCAGTGGATCTGGAGCAGATTATTCTCTCACCATCAGCAGCCTGGAATCTGAAGATTTTGCAGACTATTACTGTGTACAGTATGCTCAGTTTCCGTACACGTTCGGCGGTGGAACCAAACTG
				6	IGKV14-100*01	IGKJ2*01	97.2	\	Yes	GATATTGTGCTCACACAGTCTCCATCCTCCATGTTTGTATCTCTGGGAGACACAGTCAGCATCACTTGCCATGCAAGTCAGGGCATTAGCAGTAATATAGGGTGGTTGCAGCAGAAACCAGGGAAATCATTTAAGGGCCTGATCTATCATGGAACCAACTTGGAAGATGGAGTTCCATCAAGGTTCAGTGGCAGTGGATCTGGAGCAGATTATTCTCTCACCATCAGCAGCCTGGAATCTGAAGATTTTGCAGACTATTACTGTGTACAGTATGCTCAGTTTCCGTACACGTTCGGCGGTGGAACCAATCTG
				7	IGKV14-100*01	IGKJ2*01	98.6	\	Yes	GACATTGTGATGACCCAGACTCCATCCTCCATGTCTGTATCTCTGGGAGACACAGTCAGCATCACTTGCCATGCAAGTCAGGGCATTAGCAGTAATATAGGGTGGTTGCAGCAGAAACCAGGGAAATCATTTAAGGGCCTGATCTATCATGGAACCAACTTGGAAGATGGAGTTCCATCAAGGTTCAGTGGCAGTGGATCTGGAGCAGATTATTCTCTCACCATCAGCAGCCTGGAATCTGAAGATTTTGCAGACTATTACTGTGTACAGTATGCTCAGTTTCCGTACACGTTCGGTGGTGGAACCAA
				8	IGKV14-100*01	IGKJ2*01	97.9	\	Yes	GATATTGTGATGACCCAGACTCCATCCTCCATGTCTGTATCTCTGGGAGACACAGTCAGCATCACTTGCCATGCAAGTCAGGGCATTAGCAGTAATATAGGGTGGTTGCAGCAGAAACCAGGGAAATCATTTAAGGGCCTGATCTATCATGGAACCAACTCGGAAGATGGAGTTCCATCAAGGTTCAGTGGCAGTGGATCTGGAGCAGATTATTCTCTCACCATCAGCAGCCTGGAATCTGAAGATTTTGCAGACTATTACTGTGTACAGTATGCTCAGTTTCCGTACACGTTCGGTGGTGGAACCAAGCT
				9	IGKV9-120*01	IGKJ1*01	96.8	\	Yes	GACATTGTGCTCACACAGACTCCATCCTCCTTATCTGCCTCTCTGGGAGAAAGAGTCAGTCTCACTTGTCGGGCAAGTCAGGACATTGGTAGTAGCTTAAACTGGCTTCAGCAGGAACCAGATGGAACTATTAAACGCCTGATCTACGCCACATCCAGTTTAGATTCTGGTGTCCCCAAAAGGTTCAGTGGCAGTAGGTCTGGGTCAGATTATTCTCTCACCATCAGCAGCCTTGAGTCCGAAGATTTTGTAGACTATTACTGTCTACAATATGCTAGTTCTCCGTGGACGTTCGGTGGTGGAACCAAGCT
				10	IGKV14-100*01	IGKJ2*01	98.6	\	Yes	GATATTGTGATGACCCAAACTCCATCCTCCATGTCTGTATCTCTGGGAGACACAGTCAGCATCACTTGCCATGCAAGTCAGGGCATTAGCAGTAATATAGGGTGGTTGCAGCAGAAACCAGGGAAATCATTTAAGGGCCTGATCTATCATGGAACCAACTTGGAAGATGGAGTTCCATCAAGGTTCAGTGGCAGTGGATCTGGAGCAGATTATTCTCTCACCATCAGCAGCCTGGAATCTGAAGATTTTGCAGACTATTACTGTGTACAGTATGCTCAGTTTCCGTACACGTTCGGTGGTGGAACCAA
			2	1	IGKV17-121*01	IGKJ2*01	98.2	\	Yes	ACCCAAACTACAGCATCCCTGTCCATGGCTATAGGAGAAAAAGTCACCATCAGATGCATAACCAGCACTGATATTGACGATGATATGAACTGGTACCAGCAGAAGCCAGGGGAACCTCCTAAGTTCCTTATTTCAGAAGGCAATACTCTTCGTCCTGGAGTCCCATCCCGATTCTCCAGCAGTGGCTATGGTACAGATTTTGTTTTTACAATTGAAAACATGCTCTCAGAAGATGTTGCAGATTACTACTGTTTGCAAAGTGATAACTTGCCTCTGTACACGTTCGGTGGTGGAACCAA
				2	IGKV17-121*01	IGKJ2*01	99.3	\	Yes	ACCCAGTCTCCAGCATCCCTGTCCATGGCTATAGGAGAAAAAGTCACCATCAGATGCATAACCAGCACTGATATTGATGATGATATGAACTGGTACCAGCAGAAGCCAGGGGAACCTCCTAAGTTCCTTATTTCAGAAGGCAATACTCTTCGTCCTGGAGCCCCATCCCGATTCTCCAGCAGTGGCTATGGTACAGATTTTGTTTTTACAATTGAAAACATGCTCTCAGAAGATGTTGCAGATTACTACTGTTTGCAAAGTGATAACTTGCCTCTGTACACGTTCGGTGGTGGAACCAAACTG
				3	IGKV17-121*01	IGKJ2*01	98.6	\	Yes	TGACACAGTCTACAGCATCCCTGTCCATGGCTATAGGAGAAAAAGTCACCATCAGATGCATAACCAGCACTGATATTGATGATGATATGAACTGGTACCAGCAGAAGCCAGGGGAACCTCCTAAGTTCCTTATTTCAGAAGGCAATACTCTTCGTCCTGGAGTCCCATCCCGATTCTCCAGCAGTGGCTATGGTACAGATTTTGTTTTTACAATTGAAAACATGCTCCCAGAAGATGTTGCAGATTACTACTGTTTGCAAAGTGATAACTTGCCTCTGTACACGTTCGGTGGTGGAACCAATCTG
				4	IGKV17-121*01	IGKJ2*01	98.2	\	Yes	ACACAAACTCCAGCATCCCTGTCCATGGCTATAGGAGAAAAAGTCACCATCAGATGCATAACCAGCACTGATATTGATGATGATATGAACTGGTACCAGCAGAAGCCAGGGGAACCTCCTAAGTTCCTTATTTCAGAAGACAATACTCTTCGTCCTGGAGTCCCATCCCGATTCTCCAGCAGTGGCTATGGTACAGATTTTGTTTTTACAATTGAAAACATGCTCTCAGAAGATGTTGCAGATTACTACTGTTTGCAAAGTGATAACTTGCCTCTGTACACGTTCGGCGGTGGAACCAAACTG
				5	IGKV17-121*01	IGKJ2*01	97.8	\	Yes	ACACAAACTACAGCATCCCTGTCCATGGCTATAGGAGAAAAAGTCACCATCAGATGCATAACCAGCACTGATATTGATGATGATATGAACTGGTACCAGCAGAAGCCAGGGGAACCTCCTAAGTTCCTTATTTCAGAAGGCGATACTCTTCGTCCTGGAGTCCCATCCCGATTCTCCAGCAGTGGCTATGGTACAGATTTTGTTTTTACAATTGAAAACATGCTCTCAGAAGATGTTGCAGATTACTACTGTTTGCAAAGTGATAACTTGCCTCTGTACACGTTCGGTGGTGGAACCAATCTG
				6	IGKV17-121*01	IGKJ2*01	98.6	\	Yes	TGACACAGACTACAGCATCCCTGTCCATGGCTATAGGAGAAAAAGTCACCATCAGATGCATAACCAGCACTGATATTGATGATGATATGAACTGGTACCAGCAGAAGCCAGGGGAACCTCCTAAGTTCCTTATTTCAGAAGGCAATACTCTTCGTCCTGGAGTCCCATCCCGATTCTCCAGCAGTGGCTATGGTACAGATTTTGTTTTTACAATTGAAAACATGCTCTCAGAAGATGTTGCAGATTACTACTGTTTGCAAAGTGATAACTTGCCTCTGTACACGTTCGGCGGTGGAACCAAGCTG
				7	IGKV17-121*01	IGKJ2*01	99.3	\	Yes	TGACCCAGTCTACAGCATCCCTGTCCATGGCTATAGGAGAAAAAGTCACCATCAGATGCATAACCAGCACTGATATTGATGATGATATGAACTGGTACCAGCAGAAGCCAGGGGAACCTCCTAAGTTCCTTATTTCAGAAGGCAATACTCTTCGTCCTGGAGTCCCATCCCGATTCTCCAGCAGTGGCTATGGTACAGATTTTGTTTTTACAATTGAAAACATGCTCTCAGAAGATGTTGCAGATTACTACTGTTTGCAAAGTGATAACTTGCCTCTGTACACGTTCGGCGGTGGAACCAAGCT
				8	IGKV17-121*01	IGKJ2*01	98.9	\	Yes	TGACCCAGACTCCAGCATCCCTGTCCATGGCTATAGGAGAAAAAGTCACCATCAGATGCATAACCAGCACTGATATTGATGATGATATGAACTGGTACCAGCAGAAGCCAGGGGAACCTCCTAAGTTCCTTATTTCAGAAGGCAATACTCTTCGTCCTGGAGTCCCATCCCGATTCTCCAACAGTGGCTATGGTACAGATTTTGTTTTTACAATTGAAAACATGCTCTCAGAAGATGTTGCAGATTACTACTGTTTGCAAAGTGATAACTTGCCTCTGTACACGTTCGGCGGTGGAACCAA
				9	IGKV17-121*01	IGKJ2*01	98.2	\	Yes	TGACACAAACTCCAGCATCCCTGTCCATGGCTATAGGAGAAAAAGTCACCATCAGATGCATAACCAGCACTGATATTGATGATGATATGAACTGGTACCAGCAGAAGCCAGGGGAACCTCCTAAGTTCCTTATTTCAGAAGGCAATACTCTTCGTCCTGGAGTCCCATCCCGATTCTCCAGCAGTGGCTATGGTACAGATTTTGTTTTTACAATTGAAAACATGCTCTCAGAAGATGTTGCAGATTACTACTGTTTGCAAAGTGATGACTTGCCTCTGTACACGTTCGGCGGTGGAACCAAGCT
				10	IGKV17-121*01	IGKJ2*01	98.9	\	Yes	TGACCCAAACTCCAGCATCCCTGTCCATGGCTATAGGAGAAAAAGTCACCATCAGATGCATAACCAGCACTGATATTGATGATGATATGAACTGGTACCAGCAGAAGCCAGGGGAACCTCCTAAGTTCCTTATTTCAGAAGGCAATACTCTTCGTCCTGGAGTCCCATCCCGATTCTCCAGCAGTGGCTATGGTACAGATTTTGTTTTTACAATTGAAAACATGCTCTCAGAAGATGTTGCAGATTACTACTGTTTGCAAAGTGATAACTTGCCTCTGTACACGTTCGGCGGTGGAACCAA
			3	1	IGKV17-121*01	IGKJ2*01	98.9	\	Yes	ACCCAATCTACAGCATCCCTGTCCATGGCTATAGGAGAAAAAGTCACCATCAGATGCATAACCAGCACTGATATTGATGATGATATGAACTGGTACCAGCAGAAGCCAGGGGAACCTCCTAAGTTCCTTATTTCAGAAGGCAATACTCTTCGTCCTGGAGTCCCATCCCGATTCTCCAGCAGTGGCTATGGTACAGATTTTGTTTTTACAATTGAAAACATGCTCTCAGAAGATGTTGCAGATTACTACTGTTTGCAAAGTGATAACTTGCCTCTGTACACGTTCGGCGGTGGAACCAAGCT
				2	IGKV17-121*01	IGKJ2*01	98.2	\	Yes	TGACCCAGACTACAGCATCCCTGTCCATGGCTATAGGAGAAAAAGTCACCATCAGATGCATAACCAGCACTGATATTGATGATGATATGAACTGGTACCAGCAGAAGCCAGGGGAACCTCCTAAGTTCCTTATTTCAGAAGGCGATACTCTTCATCCTGGAGTCCCATCCCGATTCTCCAGCAGTGGCTATGGTACAGATTTTGTTTTTACAATTGAAAACATGCTCTCAGAAGATGTTGCAGATTACTACTGTTTGCAAAGTGATAACTTGCCTCTGTACACGTTCGGCGGTGGAACCAAACTG
				3	IGKV17-121*01	IGKJ2*01	98.2	\	Yes	TGACACAAACTACAGCATCCCTGTCCATGGCTATAGGAGAAAAAGTCACCATCAGATGCATAACCAGCACTGATATTGATGATGATATGAACTGGTACCAGCAGAAGCCAGGGGAACCTCCTAAGTTCCTTATTTCAGAAGGCAATACTCTTCGTCCTGGAGTCCCATCCCGATTCTCCAGCAGTGGCTATGGTACAGATTTTGTTTTTACAATTGAAAACATGCTCTCAGAAGATGTTGCAGATTACTACTGTTTGCAAAGTGATAACTTGCCTCTGTACACGTTCGGTGGTGGAACCAAACTG
				4	IGKV17-121*01	IGKJ2*01	98.5	\	Yes	ACCCAAACTACAGCATCCCTGTCCATGGCTATAGGAGAAAAAGTCACCATCAGATGCATAACCAGCACTGATATTGATGATGATATGAACTGGTACCAGCAGAAGCCAGGGGAACCTCCTAAGTTCCTTATTTCAGAAGGCAATACTCTTCGTCCTGGAGTCCCATCCCGATTCTCCAGCAGTGGCTATGGTACAGATTTTGTTTTTACAATTGAAAACATGCTCTCAGAAGATGTTGCAGATTACTACTGTTTGCAAAGTGATAACTTGCCTCTGTACACGTTCGGCGGTGGAACCAATCTG
				5	IGKV17-121*01	IGKJ2*01	98.6	\	Yes	TGACACAGACTACAGCATCCCTGTCCATGGCTATAGGAGAAAAAGTCACCATCAGATGCATAACCAGCACTGATATTGATGATGATATGAACTGGTACCAGCAGAAGCCAGGGGAACCTCCTAAGTTCCTTATTTCAGAAGGCAATACTCTTCGTCCTGGAGTCCCATCCCGATTCTCCAGCAGTGGCTATGGTACAGATTTTGTTTTTACAATTGAAAACATGCTCTCAGAAGATGTTGCAGATTACTACTGTTTGCAAAGTGATAACTTGCCTCTGTACACGTTCGGTGGTGGAACCAAACTG
				6	IGKV17-121*01	IGKJ2*01	98.2	\	Yes	TGACACAGACTACAGCATCCCTGTCCATGGCTATAGGAGAAAAAGTCACCATCAGATGCATAACCAGCACTGATATTGATGATGATATGAACTGGTACCAGCAGAAGCCAGGGGAACCTCCTAAGTTCCTTACTTCAGAAGGCAATACTCTTCGTCCTGGAGTCCCATCCCGATTCTCCAGCAGTGGCTATGGTACAGATTTTGTTTTTACAATTGAAAACATGCTCTCAGAAGATGTTGCAGATTACTACTGTTTGCAAAGTGATAACTTGCCTCTGTACACGTTCGGCGGTGGAACCAAGCTG
				7	IGKV17-121*01	IGKJ5*01	98.9	GTA	Yes	TGACCCAGTCTACAGCATCCCTGTCCATGGCTATAGGAGAAAAAGTCACCATCAGATGCGTAACCAGCACTGATATTGATGATGATATGAACTGGTACCAGCAGAAGCCAGGGGAACCTCCTAAGTTCCTTATTTCAGAAGGCAATACTCTTCGTCCTGGAGTCCCATCCCGATTCTCCAGCAGTGGCTATGGTACAGATTTTGTTTTTACAATTGAAAACATGCTCTCAGAAGATGTTGCAGATTACTACTGTTTGCAAAGTGATAACTTGCCTCTGTACACGTTCGGTGGTGG
			4	1	IGKV14-100*01	IGKJ2*01	96.8	\	Yes	GACATTGTGCTCACCCAGACTCCATCCTCCATGTCTGTATCTCTGGGAGACACAGTCAGCATCACTTGCCATGCAAGTCAGGGCATTAGCGGTAATATAGGGTGGTTGCAGCAGAAACCAGGGAAATCATTTAAGGGCCTGATGTATCATGGAACCAACTTGGAAGATGGAGTTCCATCAAGGTTCAGTGGCAGTGGATCTGGAGCAGATTATTCTCTCACCATCAGCAGCCTGGAATCTGAAGATTTTGCAGACTATTACTGTGTGCAGTATGCTCAGTTTCCGTACACGTTCGGCGGTGGAACCAA
				2	IGKV14-100*01	IGKJ2*01	97.5	\	Yes	GATATTGTGCTCACACAATCTCCATCCTCCATGTCTGTATCTCTGGGAGACACAGTCAGCATCACTTGCCATGCAAGTCAGGGCATTAGCAGTAATATAGGGTGGTTGCAGCAGAAACCAGGGAAATCATTTAAGGGCCTGATGTATCATGGAACCAACTTGGAAGATGGAGTTCCATCAAGGTTCAGTGGCAGTGGATCTGGAGCAGATTATTCTCTCACCATCAGCAGCCTGGAATCTGAAGATTTTGCAGACTATTACTGTGTACAGTATGCTCAGTTTCCGTACACGTTCGGCGGTGGAACCAACCTG
				3	IGKV14-100*01	IGKJ2*01	97.5	\	Yes	GACATTGTGCTGACACAATCTACATCCTCCATGTCTGTATCTCTGGGAGACACAGTCAGCATCACTTGCCATGCAAGTCAGGGCATTAGCAGTAATATAGGGTGGTTGCAGCAGAAACCAGGGAAATCATTTAAGGGCCTGATGTATCATGGAACCAACTTGGAAGATGGAGTTCCATCAAGGTTCAGTGGCAGTGGATCTGGAGCAGATTATTCTCTCACCACCAGCAGCCTGGAATCTGAAGATTTTGCAGACTATTACTGTGTACAGTATGCTCAGTTTCCGTACACGTTCGGCGGTGGAACCAACCTG
				4	IGKV14-100*01	IGKJ2*01	96.8	\	Yes	GACATTGTGCTCACCCAGACTCCATCCTCCATGTCTGTATCTCTGGGAAACACAGTCAGCATCACTTGCCATGCAAGTCAGGGCATTAGCAGTAATATAGGGTGGTTGCAGCAGAAACCAGGGAAATCATTTAAGGGCCTGATGTATCATGGAACCAACTTGGAAGATGGAGTTCCATCAAGGTTCAGTGGCAGTGGATCTGGAGCAGATTATTCTCTCACCATCAGCAGCCTGGAATCTGAAAATTTTGCAGACTATTACTGTGTACAGTATGCTCAGTTTCCGTACACGTTCGGCGGTGGAACCAAGCTG
				5	IGKV14-100*01	IGKJ2*01	97.9	\	Yes	GATATTGTGCTGACCCAGTCTCCATCCTCCATGTCTGTATCTCTGGGAGACACAGTCAGCATCACTTGCCATGCAAGTCAGGGCATTAGCAGTAATATAGGGTGGTTGCAGCAGAAACCAGGGAAATCATTTAAGGGCCTGATGTATCATGGAACCAACTTGGAAGATGGAGTTCCATCAAGGTTCAGTGGCAGTGGATCTGGAGCAGATTATTCTCTCACCATCAGCAGCCTGGAATCTGAAGATTTTGCAGACTATTACTGTGTACAGTATGCTCAGTTTCCGTACACGTTCGGTGGTGGAACCAAGCT
				6	IGKV14-100*01	IGKJ2*01	97.9	\	Yes	GACATTGTGCTGACCCAGACTCCATCCTCCATGTCTGTATCTCTGGGAGACACAGTCAGCATCACTTGCCATGCAAGTCAGGGCATTAGCAGTAATATAGGGTGGTTGCAGCAGAAACCAGGGAAATCATTTAAGGGCCTGATGTATCATGGAACCAACTTGGAAGATGGAGTTCCATCAAGGTTCAGTGGCAGTGGATCTGGAGCAGATTATTCTCTCACCATCAGCAGCCTGGAATCTGAAGATTTTGCAGACTATTACTGTGTACAGTATGCTCAGTTTCCGTACACGTTCGGCGGTGGAACCAAACTG
				7	IGKV14-100*01	IGKJ2*01	98.2	\	Yes	GACATTGTGCTGACCCAAACTCCATCCTCCATGTCTGTATCTCTGGGAGACACAGTCAGCATCACTTGCCATGCAAGTCAGGGCATTAGCAGTAATATAGGGTGGTTGCAGCAGAAACCAGGGAAATCATTTAAGGGCCTGATGTATCATGGAACCAACTTGGAAGATGGAGTTCCATCAAGGTTCAGTGGCAGTGGATCTGGAGCAGATTATTCTCTCACCATCAGCAGCCTGGAATCTGAAGATTTTGCAGACTATTACTGTGTACAGTATGCTCAGTTTCCGTACACGTTCGGTGG
				8	IGKV14-100*01	IGKJ2*01	97.9	\	Yes	GACATTGTGCTCACCCAATCTACATCCTCCATGTCTGTATCTCTGGGAGACACAGTCAGCATCACTTGCCATGCAAGTCAGGGCATTAGCAGTAATATAGGGTGGTTGCAGCAGAAACCAGGGAAATCATTTAAGGGCCTGATGTATCATGGAACCAACTTGGAAGATGGAGTTCCATCAAGGTTCAGTGGCAGTGGATCTGGAGCAGATTATTCTCTCACCATCAGCAGCCTGGAATCTGAAGATTTTGCAGACTATTACTGTGTACAGTATGCTCAGTTTCCGTACACGTTCGGTGGTGGAACCAAGCT
				9	IGKV14-100*01	IGKJ2*01	97.9	\	Yes	GACATTGTGATCACCCAAACTCCATCCTCCATGTCTGTATCTCTGGGAGACACAGTCAGCATCACTTGCCATGCAAGTCAGGGCATTAGCAGTAATATAGGGTGGTTGCAGCAGAAACCAGGGAAATCATTTAAGGGCCTGATGTATCATGGAACCAACTTGGAAGATGGAGTTCCATCAAGGTTCAGTGGCAGTGGATCTGGAGCAGATTATTCTCTCACCATCAGCAGCCTGGAATCTGAAGATTTTGCAGACTATTGCTGTGTACAGTATGCTCAGTTTCCGTACACGTTCGGCGGTGGAACCAA
			19	1	IGKV4-70*01	IGKJ5*01	99.3	T	Yes	ATTGTGCTGACCCAGTCTCCAGCAATCATGTCTGCATCTCCAGGGGAGAAGGTCACCATGACCTGCAGTGCCAGCTCAAGTATAAGTTACATGCACTGGTACCAGCAGAAGCCAGGCACCTCCCCCAAAAGATGGATTTATGACACATCCAAACTGGCTTCTGGAGTCCCTGCTCGCTTCAGTGGCAGTGGGTCTGGGACCTCTTATTCTCTCACAATCAGCAGCATGGAGGCTGAAGATGCTGCCACTTATTACTGCCATCAGCGGAGTAGTTATCTCACGTTCGGCGGTGGAACCAATCTG
				2	IGKV4-70*01	IGKJ5*01	99.3	T	Yes	ATTGTGATCACCCAGTCTCCAGCAATCATGTCTGCATCTCCAGGGGAGAAGGTCACCATGACCTGCAGTGCCAGCTCAAGTATAAGTTACATGCACTGGTACCAGCAGAAGCCAGGCACCTCCCCCAAAAGATGGATTTATGACACATCCAAACTGGCTTCTGGAGTCCCTGCTCGCTTCAGTGGCAGTGGGTCTGGGACCTCTTATTCTCTCACAATCAGCAGCATGGAGGCTGAAGATGCTGCCACTTATTACTGCCATCAGCGGAGTAGTTATCTCACGTTCGGCGGTGGAACCAA
				3	IGKV4-70*01	IGKJ5*01	98.5	T	Yes	ATTGTGCTGACCCAGTCTACAGCAATCATGTCTGCATCTCCAGGGGAGAAGGTCACCATGACCTGCAGTGCCAGCTCAAGTATAAGTTACATGCACTGGTACCAGCAGAAGCCAGGCACCTCCCCCAAAAGATGGATTTATGACACATCCAAACCGGCTTCTGGAGTCCCTGCTCGCTTCAGTGGCAGTGGGTCTGGGACCTCTTATTCTCTCACAATCAGCAGCATGGAGGCTGAAGATGCTGCCACTTATTACTGCCATCAGCGGAGTAGTTATCTCACGTTCGGCGGTGGAACCAAGCTG
				4	IGKV4-70*01	IGKJ5*01	98.5	T	Yes	ATTGTGATGACCCAGACTCCAGCAATCATGTCTGCATCTCCAGGGGAGAAGGTCACCATGACCTGCAGTGCCAGCTCAAGTATAAGTTACATGCACTGGTACCAGCAGAAGCCAGGCACCTCCCCCAAAAGATGGATTTATGACACATCCAAACTGGCTTCTGGAGTCCCTGCTCGCTTCAGTGGCAGTGGGTCTGGGACCTCTTATTCTCTCACAATCAGCAGCATGGAGGCTGAAGATGCTGCCACTTATTACTGCCATCAGCGGAGTAGTTATCTCACGTTCGGCGGTGGAACCAAGCTG
				5	IGKV4-70*01	IGKJ5*01	98.9	T	Yes	ATTGTGCTCACCCAATCTACAGCAATCATGTCTGCATCTCCAGGGGAGAAGGTCACCATGACCTGCAGTGCCAGCTCAAGTATAAGTTACATGCACTGGTACCAGCAGAAGCCAGGCACCTCCCCCAAAAGATGGATTTATGACACATCCAAACTGGCTTCTGGAGTCCCTGCTCGCTTCAGTGGCAGTGGGTCTGGGACCTCTTATTCTCTCACAATCAGCAGCATGGAGGCTGAAGATGCTGCCACTTATTACTGCCATCAGCGGAGTAGTTATCTCACGTTCGGCGGTGGAACCAAGCT
				6	IGKV4-70*01	IGKJ5*01	98.2	T	Yes	ATTGTGATGACACAGACTCCAGCAATCATGTCTGCATCTCCAGGGGAGAAGGTCACCATGACCTGCAGTGCCAGCTCAAGTATAAGTTACATGCACTGGTACCAGCAGAAGCCAGGCACCTCCCCCAAAAGATGGATTTATGACACATCCAAACTGGCTTCTGGAGTCCCTGCTCGCTTCAGTGGCAGTGGGTCTGGGACCTCTTATTCTCTCACAATCAGCAGCATGGAGGCTGAAGATGCTGCCACTTATTACTGCCATCAGCGGAGTAGTTATCTCACGTTCGGTGGTGGAACCAA
		mMT-1	1	1	IGKV17-121*01	IGKJ2*01	99.3	\	Yes	TGACCCAGACTCCAGCATCCCTGTCCATGGCTATAGGAGAAAAAGTCACCATCAGATGCATAACCAGCACTGATATTGATGATGATATGAACTGGTACCAGCAGAAGCCAGGGGAACCTCCTAAGTTCCTTATTTCAGAAGGCAATACTCTTCGTCCTGGAGTCCCATCCCGATTCTCCAGCAGTGGCTATGGTACAGATTTTGTTTTTACAATTGAAAACATGCTCTCAGAAGATGTTGCAGATTACTACTGTTTGCAAAGTGATAACTTGCCTCTGTACACGTTCGGCGGTGGAACCAA
				2	IGKV9-124*01	IGKJ2*01	99.3	\	Yes	TGACCCAGTCTCCATCCTCCTTATCTGCCTCTCTGGGAGAAAGAGTCAGTCTCACTTGTCGGGCAAGTCAGGAAATTAGTGGTTACTTAAGCTGGCTTCAGCAGAAACCAGATGGAACTATTAAACGCCTGATCTACGCCGCATCCACTTTAGATTCTGGTGTCCCAAAAAGGTTCAGTGGCAGTAGGTCTGGGTCAGATTATTCTCTCACCATCAGCAGCCTTGAGTCTGAAGATTTTGTAGACTATTACTGTCTACAATATTCTAGTTATCCGTACACGTTCGGTGGTGGAACCAAGCTG
				3	IGKV9-124*01	IGKJ2*01	98.2	\	Yes	GATCACACAGTCTACATCCTCCTTATCTGCCTCTCTGGGAGAAAGAGTCAGTCTCACTTGTCGGGCAAGTCAGGAAATTAGTGGTTACTTAAGCTGGCTTCAGCAGAAACCAGATGGAACTATTAAACGCCTGATCTACGCCGCATCCACTTTAGATTCTGGTGTCCCAAAAAGGTTCAGTGGCAGTAGGTCTGGGTCAGATTATTCTCTCACCATCAGCAGCCTTGAGTCTGAAGATTTTGTAGACTATTACTGTCTACAATATTCTAGTTATCCGTACACGTTCGGTGGTGGAACCAACCTG
				4	IGKV17-121*01	IGKJ2*01	98.6	\	Yes	TGACCCAATCTACAGCATCCCTGTCCATGGCTATAGGAGAAAAAGTCACCATCAGATGCATAACCAGCACTGATATTGATGATGATATGAACTGGTACCAGCAGAAGCCAGGGGAACCTCCTAAGTTCCTTATTTCAGAAGGCAATACTCTTCGTCCTGGAGTCCCATCCCGATTCTCCAGCAGTGGCTATGGTACAGATTTTGTTTTTACAATTGAAAACATGCTCTCAGAAGATGTTGCAGATTACTACTGCTTGCAAAGTGATAACTTGCCTCTGTACACGTTCGGTGGTGGAACCAA
				5	IGKV17-121*01	IGKJ2*01	98.2	\	Yes	ACCCAGACTCCAGCATCCCTGTCCGTGGCTATAGGAGAAAAAGTCACCATCAGATGCATAACCAGCACTGATATCGATGATGATATGAACTGGTACCAGCAGAAGCCAGGGGAACCTCCTAAGTTCCTTATTTCAGAAGGCAATACTCTTCGTCCTGGAGTCCCATCCCGATTCTCCAGCAGTGGCTATGGTACAGATTTTGTTTTTACAATTGAAAACATGCTCTCAGAAGATGTTGCAGATTACTACTGTTTGCAAAGTGGTAACTTGCCTCTGTACACGTTCGGCGGTGGAACCAA
				6	IGKV17-121*01	IGKJ2*01	98.9	\	Yes	TGACACAGACTCCAGCATCCCTGTCCATGGCTATAGGAGAAAAAGTCACCATCAGATGCATAACCAGCACTGATATTGATGATGATATGAACTGGTACCAGCAGAAGCCAGGGGAACCTCCTAAGTTCCTTATTTCAGAAGGCAATACTCTTCGTCCTGGAGTCCCATCCCGATTCTCCAGCAGTGGCTATGGTACAGATTTTGTTTTTACAATTGAAAACATGCTCTCAGAAGATGTTGCAGATTACTACTGTTTGCAAAGTGATAACTTGCCTCTGTACACGTTCGGCGGTGGAACCAA
				7	IGKV17-121*01	IGKJ2*01	99.3	\	Yes	TGACCCAATCTCCAGCATCCCTGTCCATGGCTATAGGAGAAAAAGTCACCATCAGATGCATAACCAGCACTGATATTGATGATGATATGAACTGGTACCAGCAGAAGCCAGGGGAACCTCCTAAGTTCCTTATTTCAGAAGGCAATACTCTTCGTCCTGGAGTCCCATCCCGATTCTCCAGCAGTGGCTATGGTACAGATTTTGTTTTTACAATTGAAAACATGCTCTCAGAAGATGTTGCAGATTACTACTGTTTGCAAAGTGATAACTTGCCTCTGTACACGTTCGGCGGTGGAACCAA
			2	1	IGKV17-121*01	IGKJ2*01	97.8	\	Yes	ACACAAACTACAGCATCCCTGTCCATGGCTATAGGAGAAAAAGTCACCATCAGATGCATAACCAGCACTGATATTGATGATGATATGAACTGGTACCAGCAGAAGCCAGGGGAACCTCCTAAGTTCCTTATTTCAGAAGGCAATACTCTTCGTCCTAGAGTCCCATCCCGATTCTCCAGCAGTGGCTATGGTACAGATTTTGTTTTTACAATTGAAAACATGCTCTCAGAAGATGTTGCAGATTACTACTGTTTGCAAAGTGATAACTTGCCTCTGTACACGTTCGGTGGTGGAACCAAC
			3	1	IGKV17-121*01	IGKJ2*01	98.2	\	Yes	TGACACAGACTCCAGCATCCCTGTCCATGGCTATAGGAGAAGAAGTCACCATCAGATGCATAACCAGCACTGATATTGATGATGATATGAACTGGTACCAGCAGAAGCCAGGGGAACCTCCTAAGTTCCTTATTCCAGAAGGCAATACTCTTCGTCCTGGAGTCCCATCCCGATTCTCCAGCAGTGGCTATGGTACAGATTTTGTTTTTACAATTGAAAACATGCTCTCAGAAGATGTTGCAGATTACTACTGTTTGCAAAGTGATAACTTGCCTCTGTACACGTTCGGCGGTGGAACCAACCTG
				2	IGKV17-121*01	IGKJ2*01	98.2	\	Yes	TGACACAAACTACAGCATCCCTGTCCATGGCTATAGGAGAAAAAGTCACCATCAGATGCATAACCAGCACTGATATTGATGATGATATGAACTGGTACCAGCAGAAGCCAGGGGAACCTCCTAAGTTCCTTATTTCAGAAGGCAATACTCTTCGTCCTGGAGTCCCATCCCGATTCTCCAGCAGTGGCTATGGTACAGATTTTGTTTTTACAATTGAAAACATGCTCTCAGAAGATGTTGCAGATTACTACTGTTTGCAAAGTGATAACTTGCCTCTGTACACGTTCGGCGGTGGAACCAAGCTG
				3	IGKV17-121*01	IGKJ2*01	98.9	\	Yes	TGACCCAGTCTACAGCATCCCTGTCCATGGCTATAGGTGAAAAAGTCACCATCAGATGCATAACCAGCACTGATATTGATGATGATATGAACTGGTACCAGCAGAAGCCAGGGGAACCTCCTAAGTTCCTTATTTCAGAAGGCAATACTCTTCGTCCTGGAGTCCCATCCCGATTCTCCAGCAGTGGCTATGGTACAGATTTTGTTTTTACAATTGAAAACATGCTCTCAGAAGATGTTGCAGATTACTACTGTTTGCAAAGTGATAACTTGCCTCTGTACACGTTCGGCGGTGGAACCAACCTG
				4	IGKV17-121*01	IGKJ2*01	98.6	\	Yes	TGACCCAAACTACAGCATCCCTGTCCATGGCTATAGGAGAAAAAGTCACCATCAGATGCATAACCAGCACTGATATTGATGATGATATGAACTGGTACCAGCAGAAGCCAGGGGAACCTCCTAAGTTCCTTATTTCAGAAGGCAATACTCTTCGTCCTGGAGTCCCATCCCGATTCTCCAGCAGTGGCTATGGTACAGATTTTGTTTTTACAATTGAAAACATGCTCTCAGAAGATGTTGCAGATTACTACTGTTTGCAAAGTGATAACTTGCCTCTGTACACGTTCGGCGGTGGAACCAAACTG
				5	IGKV17-121*01	IGKJ2*01	98.9	\	Yes	TGACCCAATCTACAGCATCCCTGTCCATGGCTATAGGAGAAAAAGTCACCATCAGATGCATAACCAGCACTGATATTGATGATGATATGAACTGGTACCAGCAGAAGCCAGGGGAACCTCCTAAGTTCCTTATTTCAGAAGGCAATACTCTTCGTCCTGGAGTCCCATCCCGATTCTCCAGCAGTGGCTATGGTACAGATTTTGTTTTTACAATTGAAAACATGCTCTCAGAAGATGTTGCAGATTACTACTGTTTGCAAAGTGATAACTTGCCTCTGTACACGTTCGGCGGTGGAACCAACCTG
			4	1	IGKV9-124*01	IGKJ5*01	96.1	AT	Yes	GACATTGTGCTCACACAGACTACATCCTCCTTATCTGCCTCTCTGGGAGAAAGAGTCAGTCTCACTTGTCGGGCAAGTCAGGAAATTAGTGGTTACTTAAGCTGGCTTCAGCAGAAACCAGATGGAACTATTAAACGCCTGATCTACGCCGCATCCACTTTAGATCCTGGTGCTCCAAAAAGGTTCAGTGGCAGTAGGTCTGGGTCAGATTATTCTCTCACCATCAGCAGCCTTGAGTCTGAAGATTTTGCAGACTATTACTGTCTACAATATGCTAGTTATCCATTCACGTTCGGTGGTGGAACCAAGCTG
				2	IGKV9-124*01	IGKJ5*01	97.8	AT	Yes	ACCCAGACTCCATCCTCCTTATCTGCCTCTCTGGGAGAAAGAGTCAGTCTCACTTGTCGGGCAAGTCAGGAAATTAGTGGTTACTTAAGCTGGCTTCAGCAGAAACCAGATGGAGCTATTAAACGCCTGATCTACGCCGCATCCACTTTAGATCCTGGTGCCCCAAAAGGTTCAGTGGCAGTAGGTCTGGGTCAGATTATTCTCTCACCATCAGCAGCCTTGAGTCTGAGGATTTTGCAGACTATTACTGTCTACAATATGCTAGTTATCCATTCACGTTCGGTGGTGGAACCAAGCTG
				3	IGKV9-124*01	IGKJ5*01	98.2	AT	Yes	TGACACAGACTACATCCTCCTTATCTGCCTCTCTGGGAGAAAGAGTCAGTCTCACTTGTCGGGCAAGTCAGGAAATTAGTGGTTACTTAAGCTGGCTTCAGCAGAAACCAGATGGAACTATTAAACGCCTGATCTACGCCGCATCCACTTTAGATCCTGGTGCCCCAAAAAGGTTCAGTGGCAGTAGGTCTGGGTCAGATTATTCTCTCACCATCAGCAGCCTTGAGTCTGAAGATTTTGCAGACTATTACTGTCTACAATATGCTAGTTATCCATTCACGTTCGGCGGTGGAACCAACCTG
				4	IGKV9-124*01	IGKJ5*01	98.5	AT	Yes	TGACCCAATCTCCATCCTCCTTATCTGCCTCTCTGGGAGAAAGAGTCAGTCTCACTTGTCGGGCAAGTCAGGAAATTAGTGGTTACTTAAGCTGGCTTCAGCAGAAACCAGATGGAACTATTAAACGCCTGATCTACGCCCCATCCACTTTAGATCCTGGTGCCCCAAAAAGGTTCAGTGGCAGTAGGTCTGGGTCAGATTATTCTCTCACCATCAGCAGCCTTGAGTCTGAAGATTTTGCAGACTATTACTGTCTACAATATGCTAGTTATCCATTCACGTTCGGTGGTGGAACCAAGCTG
				5	IGKV9-124*01	IGKJ5*01	97.4	AT	Yes	TGACACAGACTACATCCTCCTTATCTGCCTCTCTGGGAGAAAGAGTCAGTCTCACTTGTCGGGCAAGTCAGGAAATTAGTGGTTACTTAAGCTGGCTTCAGCAGAAACCAGATGGAACTATTAAACGCCTGATCTACGCCGCATCCACTTTAGATCCTGGTGCCCCAAAAAGGTTCAGTGGCAGTAGGTCTGGGTCAGATTATTCTCTCACCATCAGCAGCCTTGAGTCTGAGGGTTTTGCAGACTATTACTGTCTACAATATGCTAGTTATCCATTCACGTTCGGCGGTGGAACCATGCTG
		mMT-1	1	1	IGKV17-121*01	IGKJ2*01	99.6	ACA	Yes	TGACCCAGTCTCCAGCATCCCTGTCCATGGCTATAGGAGAAAAAGTCACCATCAGATGCATAACCAGCACTGATATCGATGATGATATGAACTGGTACCAGCAGAAGCCAGGGGAACCTCCTAAGCTCCTTATTTCAGAAGGCAATACTCTTCGTCCTGGAGTCCCATCCCGATTCTCCAGCAGTGGCTATGGTACAGATTTTGTTTTTACAATTGAAAACATGCTCTCAGAAGATGTTGCAGATTACTACTGTTTGCAAAGTGATAACTTGCCTCACATGTACACGTTCGGTGGTGGAACCAAACTG
				2	IGKV17-121*01	IGKJ2*01	97.8	ACA	Yes	ACACAAACTACAGCATCCCTGTCCATGGCTATAGGAGAAAAAGTCACCATCAGGTGCATAACCAGCACTGATATCGATGATGATATGAACTGGTACCAGCAGAAGCCAGGGGAACCTCCTAAGCTCCTTATTTCAGAAGGCAATACTCTTCGTCCTGGAGTCCCATCCCGATTCTCCAGCAGTGGCTATGGTACAGATTTTGTTTTTACAATTGAAAACATGCTCTCAGAAGATGTTGCAGATTACTACTGTTTGCAAAGTGATAACTTGCCTCACATGTACACGTTCGGTGGTGGAACCAATCTG
				3	IGKV17-121*01	IGKJ2*01	98.6	ACA	Yes	TGACACAGTCTACAGCATCCCTGTCCATGGCTATAGGAGAAAAAGTCACCATCAGATGCATAACCAGCACTGATATCGATGATGATATGAACTGGTACCAGCAGAAGCCAGGGGAACCTCCTAAGCTCCTTATTTCAGAAGGCAATACTCTTCGTCCTGGAGTCCCATCCCGATTCTCCAGCAGTGGCTATGGTACAGATTTTGTTTTTACAATTGAAAACATGCTCTCAGAAGATGTTGCAGATTACTACTGTTTGCAAAGCGATAACTTGCCTCACATGTACACGTTCGGCGGTGGAACCAATCTG
				4	IGKV17-121*01	IGKJ2*01	98.2	ACA	Yes	TGACACAAACTCCAGCATCCCTGTCCATGGCTATAGGAGAAAAAGTCACCATCAGATGCATAACCAGCACTGATATCGATGATGATATGAACTGGTACCAGCAGAAGCCAGGGGAACCTCCTAAGCTCCTTATTTCAGAAGGCAATACTCTTCGTCCTGGAGTCCCATCCCGATTCTCCAGCAGTGGCTATGGTACAGATTTTGTTTTTACAATTGAAAACATGCTCTCAGAAGATGTTGCAGATTACTACTGTTTGCAAAGTGATAACGTGCCTCACATGTACACGTTCGGCGGTGGAACCAAGCTG
				5	IGKV17-121*01	IGKJ2*01	97.5	ACA	Yes	TGACACAGACTCCAGCATCCCTGTCCATGGCTATAGGAGAAAAAGTCACCATCAGATGCATAACCAGCACTGATATCGATGATGATATGAACTGGTACCAGCAGAAGCCAGGGGAACCTCCTAAGCTCCTTATTTCAGAAGGCAATACTCTTCGTCCTGGAGTCCCATCCCGACTCTCCAGCAGTGGCTATGGTACAGACTTTGTTTTCACAATTGAAAACATGCTCTCAGAAGATGTTGCAGGTTACTACTGTTTGCAAAGTGATAACTTGCCTCACATGTACACGTTCGGCGGTGGAACCAAACTG
			2	1	IGKV5-43*01	IGKJ5*01	98.9	GC	Yes	GATATTGTGATCACCCAGTCTCCAGCCACCCTGTCTGTGACTCCAGGAGATAGCGTCAGTCTTTCCTGCAGGGCCAGCCAAAGTATTAGCAACAACCTACACTGGTATCAACAAAAATCACATGAGTCTCCAAGGCTTCTCATCAAGTATGCTTCCCAGTCCATCTCTGGGATCCCCTCCAGGTTCAGTGGCAGTGGATCAGGGACAGATTTCACTCTCAGTATCAACAGTGTGGAGACTGAAGATTTTGGAATGTATTTCTGTCAACAGAGTAACAGCTGGCCTGCGCTCACGTTCGGCGGTGGAACCAAACT
				2	IGKV5-43*01	IGKJ5*01	98.2	GC	Yes	GATATTGTGATCACCCAATCTCCAGCCACCCTGTCTGTGACTCCAGGAGATAGCGTCAGTCTTTCCTGCAGGGCCAGCCAAAGTATTAGCAACAACCTACACTGGTATCAACAAAAATCACATGAGTCTCCAAGGCTTCTCATCAAGTATGCTTCCCAGTCCATCTCTGGGATCCCCTCCAGGTTCAGTGGCAGTGGATCAGGGACAGATTTCACTCTCAGTATCAACAGTGTGGAGACTGAAGATTTTGGAACGTATTTCTGTCAACAGAGTAACAGCTGGCCTGCGCTCACGTTCGGCGGTGGAACCAAGCTG
				3	IGKV5-43*01	IGKJ5*01	98.9	GC	Yes	GATATTGTGCTGACACAGTCTCCAGCCACCCTGTCTGTGACTCCAGGAGATAGCGTCAGTCTTTCCTGCAGGGCCAGCCAAAGTATTAGCAACAACCTACACTGGTATCAACAAAAATCACATGAGTCTCCAAGGCTTCTCACCAAGTATGCTTCCCAGTCCATCTCTGGGATCCCCTCCAGGTTCAGTGGCAGTGGATCAGGGACAGATTTCACTCTCAGTATCAACAGTGTGGAGACTGAAGATTTTGGAATGTATTTCTGTCAACAGAGTAACAGCTGGCCTGCGCTCACGTTCGGCGGTGGAACCAATCTG
				4	IGKV5-43*01	IGKJ5*01	98.6	GC	Yes	GATATTGTGCTCACCCAGACTCCAGCCACCCTGTCTGTGACTCCAGGAGATAGCGTCAGTCTTTCCTGCAGGGCCAGCCAAAGTATTAGCAACAACCTACACTGGTATCAACAAAAATCACATGAGTCTCCAAGGCTTCTCATCAAGTATGCTTCCCGGTCCATCTCTGGGATCCCCTCCAGGTTCAGTGGCAGTGGATCAGGGACAGATTTCACTCTCAGTATCAACAGTGTGGAGACTGAAGATTTTGGAATGTATTTCTGTCAACAGAGTAACAGCTGGCCTGCGCTCACGTTCGGTGGTGGAACCAAACTG
