# Supplementary material for: Immunoglobulin kappa light chain produced by cardiomyocytes and participates in maintaining intercalated disc integrity
Source: Research Square preprint supplement (doi:10.21203/rs.3.rs-114990/v1), 2020-12-02
Supplement: Supplementary file 5 [file 48d5f6725ee4e756027549e3.docx]

| **Gene name** |  | **Primer sequence** | **Product size(bp)** |
| --- | --- | --- | --- |
| Ig constant region | Sense primer | GGGACCAAGYTGGARATVAA | 256 |
| Antisense primer | CTCGTCCTTGGTCAACGTG |
| Ig variable region | Sense primer | GAYATTGTGMTSACMCARWCTMCA | 311 |
| Enternal antisense primer | GTCCTGATCAGTCCAACTGTTCAG |
| Internal antisense primer | AGNTTGGTTCCACCRCCGAACG |
| CD20 | Sense primer | TTCAAACTTCCAAGCCGTATG | 241 |
| Enternal antisense primer | GAGTTTAAGGAGCGATCTC |
| Internal antisense primer | GACAGCAGAACCACATTAGAT |
| Myh6 | Sense primer | AACGTGTCATCCAGTACTTTG | 242 |
| Antisense primer | CAGAAGGTAGGTCTCTATGTCTG |
| Myh7 | Sense primer | GATTATCCAGTGGAACATTAGG | 162 |
| Antisense primer | GACTTCTCTAGTGCATCTTTGAC |
| cTnI | Sense primer | ACGTGGAAGCAAAAGTCACC | 189 |
| Antisense primer | CCTTCTTCACCTGCTTGAGG |
| cTnT | Sense primer | GAGGAACAGGAAGAGCAAGA | 191 |
| Antisense primer | ACCAAGTTGGGCATGAAGAG |
| GAPDH | Sense primer | CAAGGTCATCCATGACAACTTTG | 498 |
| Antisense primer | GTCCACCACCCTGTTGCTGTAG |
