# Supplementary material for: Immunoglobulin kappa light chain produced by cardiomyocytes and participates in maintaining intercalated disc integrity
Source: Research Square preprint supplement (doi:10.21203/rs.3.rs-114990/v1), 2020-12-02
Supplement: Supplementary file 7 [file f28a863c534fde7b56613346.xlsx]

## Sheet: Sheet1
	K1	K2	K3	K4	K5	K6	K7	K8	K9	K10	K11	K12	K13	K14	K15	K16	K17	K18	K19	K20
	V-GENE and allele	V-GENE and allele	V-GENE and allele	V-GENE and allele	V-GENE and allele	V-GENE and allele	IGKV1-110*01 F	V-GENE and allele	V-GENE and allele	V-GENE and allele	V-GENE and allele	V-GENE and allele	V-GENE and allele	V-GENE and allele	V-GENE and allele	V-GENE and allele	V-GENE and allele	V-GENE and allele	V-GENE and allele	V-GENE and allele
	IGKV9-120*01	IGKV14-100*01	IGKV9-120*01	IGKV14-100*01	IGKV9-120*01	IGKV8-30*01	IGKV1-110*01 F	IGKV9-120*01 F	IGKV14-100*01	IGKV9-120*01	IGKV9-120*01	IGKV9-120*01	IGKV14-100*01	IGKV17-121*01	IGKV4-91*01	IGKV14-100*01	IGKV4-70*01	IGKV9-124*01	IGKV9-124*01	IGKV9-120*01
	IGKV9-120*01	IGKV14-100*01	IGKV9-120*01	IGKV14-100*01	IGKV9-120*01	IGKV9-120*01	IGKV1-117*01 F	IGKV9-120*01 F	IGKV14-100*01	IGKV9-120*01	IGKV9-120*01	IGKV17-121*01	IGKV14-100*01	IGKV17-121*01	IGKV4-91*01	IGKV14-100*01	IGKV4-70*01	IGKV9-124*01	IGKV9-124*01	IGKV17-121*01
	IGKV9-120*01	IGKV14-100*01	IGKV9-120*01	IGKV14-100*01	IGKV9-120*01	IGKV9-120*01	IGKV1-135*01 F	IGKV9-120*01 F	IGKV14-100*01	IGKV9-120*01	IGKV9-120*01	IGKV17-121*01	IGKV14-100*01	IGKV17-121*01	IGKV4-91*01	IGKV14-100*01	IGKV4-70*01	IGKV9-124*01	IGKV9-124*01	IGKV17-121*01
	IGKV9-120*01	IGKV14-100*01	IGKV9-120*01	IGKV14-100*01	IGKV9-120*01	IGKV9-120*01	IGKV1-135*01 F	IGKV9-120*01 F	IGKV14-100*01	IGKV9-120*01	IGKV14-100*01	IGKV17-121*01	IGKV14-100*01	IGKV17-121*01	IGKV4-91*01	IGKV14-100*01	IGKV4-70*01	IGKV9-124*01	IGKV9-124*01	IGKV17-121*01
	IGKV9-120*01	IGKV14-100*01	IGKV9-120*01	IGKV14-100*01	IGKV9-120*01	IGKV9-120*01	IGKV1-135*01 F	IGKV9-120*01 F	IGKV14-100*01	IGKV9-120*01	IGKV14-100*01	IGKV17-121*01	IGKV14-100*01	IGKV17-121*01	IGKV17-121*01	IGKV14-100*01	IGKV4-70*01	IGKV9-124*01	IGKV9-124*01	IGKV17-121*01
	IGKV9-120*01	IGKV14-100*01	IGKV9-120*01	IGKV14-100*01	IGKV9-120*01	IGKV8-30*01	IGKV1-135*01 F	IGKV9-120*01 F	IGKV14-100*01	IGKV9-120*01	IGKV14-100*01	IGKV17-121*01	IGKV9-120*01	IGKV17-121*01	IGKV4-91*01	IGKV14-100*01	IGKV4-70*01	IGKV9-124*01	IGKV9-124*01	IGKV17-121*01
	IGKV9-120*01	IGKV14-100*01	IGKV9-120*01	IGKV14-100*01	IGKV9-120*01	IGKV8-30*01	IGKV1-135*01 F	IGKV9-120*01 F	IGKV14-100*01	IGKV9-120*01	IGKV14-100*01	IGKV17-121*01	IGKV14-100*01	IGKV17-121*01	IGKV4-91*01	IGKV14-100*01	IGKV4-70*01	IGKV9-124*01	IGKV9-124*01	IGKV17-121*01
	IGKV9-120*01	IGKV14-100*01	IGKV9-120*01	IGKV14-100*01	IGKV9-120*01	IGKV8-30*01	IGKV1-135*01 F	IGKV9-120*01 F	IGKV14-100*01	IGKV9-120*01	IGKV14-100*01	IGKV17-121*01	IGKV9-120*01	IGKV17-121*01	IGKV17-121*01	IGKV14-100*01	IGKV4-70*01	IGKV9-124*01	IGKV9-124*01	IGKV17-121*01
	IGKV9-120*01	IGKV14-100*01	IGKV9-120*01	IGKV14-100*01	IGKV9-120*01	IGKV8-30*01	IGKV1-135*01 F	IGKV9-120*01 F	IGKV14-100*01	IGKV9-120*01	IGKV9-120*01	IGKV17-121*01	IGKV9-120*01	IGKV17-121*01	IGKV17-121*01	IGKV14-100*01	IGKV4-70*01	IGKV9-124*01	IGKV9-124*01	IGKV17-121*01
	IGKV9-120*01	IGKV14-100*01	IGKV9-120*01	IGKV14-100*01	IGKV9-120*01	IGKV8-30*01	IGKV1-135*01 F	IGKV9-120*01 F	IGKV14-100*01	IGKV9-120*01	IGKV9-120*01	IGKV17-121*01	IGKV9-120*01	IGKV17-121*01	IGKV4-91*01	IGKV14-100*01	IGKV4-70*01	IGKV9-124*01	IGKV9-124*01	IGKV17-121*01
	IGKV9-120*01	IGKV14-100*01	IGKV9-120*01	IGKV14-100*01	IGKV9-120*01	IGKV8-30*01	IGKV1-135*01 F	IGKV9-120*01 F	IGKV14-100*01	IGKV9-120*01	IGKV14-100*01	IGKV17-121*01	IGKV14-100*01	IGKV17-121*01	IGKV4-91*01	IGKV14-100*01	IGKV4-70*01	IGKV9-124*01	IGKV9-124*01	IGKV17-121*01
	IGKV9-120*01	IGKV14-100*01	IGKV9-120*01	IGKV14-100*01	IGKV9-120*01	IGKV8-30*01	IGKV1-135*01 F	IGKV9-120*01 F	IGKV14-100*01	IGKV9-120*01	IGKV14-100*01	IGKV17-121*01	IGKV14-100*01	IGKV17-121*01	IGKV17-121*01	IGKV14-100*01	IGKV4-70*01	IGKV9-124*01	IGKV9-124*01	IGKV17-121*01
	IGKV9-120*01	IGKV14-100*01	IGKV9-120*01	IGKV14-100*01	IGKV9-120*01	IGKV8-30*01	IGKV1-135*01 F	IGKV9-120*01 F	IGKV14-100*01	IGKV9-120*01	IGKV9-120*01	IGKV17-121*01	IGKV14-100*01	IGKV17-121*01	IGKV4-91*01	IGKV14-100*01	IGKV4-70*01	IGKV9-124*01	IGKV9-124*01	IGKV17-121*01
	IGKV9-120*01	IGKV14-100*01	IGKV9-120*01	IGKV14-100*01	IGKV9-120*01	IGKV8-30*01	IGKV1-135*01 F	IGKV9-120*01 F	IGKV14-100*01	IGKV9-120*01	IGKV14-100*01	IGKV17-121*01	IGKV14-100*01	IGKV17-121*01	IGKV17-121*01	IGKV14-100*01	IGKV4-70*01	IGKV9-124*01	IGKV9-124*01	IGKV17-121*01
	IGKV9-120*01	IGKV14-100*01	IGKV9-120*01	IGKV14-100*01	IGKV9-120*01	IGKV8-30*01	IGKV1-135*01 F	IGKV1-135*01 F	IGKV14-100*01	IGKV9-120*01	IGKV14-100*01	IGKV17-121*01	IGKV14-100*01	IGKV17-121*01	IGKV4-91*01	IGKV14-100*01	IGKV4-70*01	IGKV9-124*01	IGKV9-124*01	IGKV17-121*01
	IGKV9-120*01	IGKV14-100*01	IGKV9-120*01	IGKV14-100*01	IGKV9-120*01	IGKV9-120*01	IGKV1-135*01 F	IGKV14-111*01 F	IGKV14-100*01	IGKV9-120*01	IGKV14-100*01	IGKV17-121*01	IGKV14-100*01	IGKV17-121*01	IGKV17-121*01	IGKV14-100*01	IGKV4-70*01	IGKV9-124*01	IGKV9-124*01	IGKV17-121*01
	IGKV9-120*01	IGKV14-100*01	IGKV9-120*01	IGKV14-100*01	IGKV9-120*01	IGKV8-30*01	IGKV1-135*01 F	IGKV1-135*01 F	IGKV14-100*01	IGKV9-120*01	IGKV9-120*01	IGKV17-121*01	IGKV14-100*01	IGKV17-121*01	IGKV4-91*01	IGKV14-100*01	IGKV4-70*01	IGKV9-124*01	IGKV9-124*01	IGKV17-121*01
	IGKV9-120*01	IGKV14-100*01	IGKV9-120*01	IGKV14-100*01	IGKV9-120*01	IGKV8-30*01	IGKV1-135*01 F	IGKV9-120*01 F	IGKV14-100*01	IGKV9-120*01	IGKV14-100*01	IGKV17-121*01	IGKV14-100*01	IGKV17-121*01	IGKV4-91*01	IGKV14-100*01	IGKV4-70*01	IGKV9-124*01	IGKV9-124*01	IGKV17-121*01
	IGKV9-120*01	IGKV14-100*01	IGKV9-120*01	IGKV14-100*01	IGKV9-120*01	IGKV8-30*01	IGKV1-135*01 F	IGKV9-120*01 F	IGKV14-100*01	IGKV9-120*01	IGKV9-120*01	IGKV17-121*01	IGKV9-120*01	IGKV17-121*01	IGKV17-121*01	IGKV14-100*01	IGKV4-70*01	IGKV9-124*01	IGKV9-124*01	IGKV17-121*01
	IGKV9-120*01	IGKV14-100*01	IGKV9-120*01	IGKV14-100*01	IGKV9-120*01	IGKV9-120*01	IGKV1-135*01 F	IGKV9-120*01 F	IGKV14-100*01	IGKV9-120*01	IGKV9-120*01	IGKV17-121*01	IGKV14-100*01	IGKV17-121*01	IGKV4-91*01	IGKV14-100*01	IGKV4-70*01	IGKV9-124*01	IGKV9-124*01	IGKV17-121*01
	IGKV9-120*01	IGKV14-100*01	IGKV9-120*01	IGKV14-100*01	IGKV9-120*01	IGKV8-30*01	IGKV1-135*01 F	IGKV9-120*01 F	IGKV14-100*01	IGKV9-120*01	IGKV14-100*01	IGKV17-121*01	IGKV14-100*01	IGKV17-121*01	IGKV4-91*01	IGKV14-100*01	IGKV4-70*01	IGKV9-124*01	IGKV9-124*01	IGKV17-121*01
	IGKV9-120*01	IGKV14-100*01	IGKV9-120*01	IGKV14-100*01	IGKV9-120*01	IGKV8-30*01	IGKV1-135*01 F	IGKV9-120*01 F	IGKV14-100*01	IGKV9-120*01	IGKV14-100*01	IGKV17-121*01	IGKV14-100*01	IGKV17-121*01	IGKV4-91*01	IGKV14-100*01	IGKV4-70*01	IGKV9-124*01	IGKV9-124*01	IGKV17-121*01
	IGKV9-120*01	IGKV14-100*01	IGKV9-120*01	IGKV14-100*01	IGKV9-120*01	IGKV9-120*01	IGKV1-135*01 F	IGKV9-120*01 F	IGKV14-100*01	IGKV9-120*01	IGKV14-100*01	IGKV17-121*01	IGKV14-100*01	IGKV17-121*01	IGKV4-91*01	IGKV14-100*01	IGKV4-70*01	IGKV9-124*01	IGKV9-124*01	IGKV17-121*01
	IGKV9-120*01	IGKV14-100*01	IGKV9-120*01	IGKV14-100*01	IGKV9-120*01	IGKV8-30*01	IGKV1-135*01 F	IGKV9-120*01 F	IGKV14-100*01	IGKV9-120*01	IGKV14-100*01	IGKV17-121*01	IGKV14-100*01	IGKV17-121*01	IGKV4-91*01	IGKV14-100*01	IGKV4-70*01	IGKV9-124*01	IGKV9-124*01	IGKV17-121*01
	IGKV9-120*01	IGKV14-100*01	IGKV9-120*01	IGKV14-100*01	IGKV9-120*01	IGKV8-30*01	IGKV1-135*01 F	IGKV1-135*01 F	IGKV14-100*01	IGKV9-120*01	IGKV14-100*01	IGKV17-121*01	IGKV9-120*01	IGKV17-121*01	IGKV17-121*01	IGKV14-100*01	IGKV4-70*01	IGKV9-124*01	IGKV9-124*01	IGKV17-121*01
	IGKV9-120*01	IGKV14-100*01	IGKV9-120*01	IGKV14-100*01	IGKV9-120*01	IGKV8-30*01	IGKV1-135*01 F	IGKV9-120*01 F	IGKV14-100*01	IGKV9-120*01	IGKV14-100*01	IGKV17-121*01	IGKV9-120*01	IGKV17-121*01	IGKV4-91*01	IGKV14-100*01	IGKV4-70*01	IGKV9-124*01	IGKV9-124*01	IGKV17-121*01
	IGKV9-120*01	IGKV14-100*01	IGKV9-120*01	IGKV14-100*01	IGKV9-120*01	IGKV8-30*01	IGKV1-135*01 F	IGKV14-111*01 F	IGKV14-100*01	IGKV9-120*01	IGKV9-120*01	IGKV17-121*01	IGKV14-100*01	IGKV17-121*01	IGKV4-91*01	IGKV14-100*01	IGKV4-70*01	IGKV9-124*01	IGKV9-124*01	IGKV17-121*01
	IGKV9-120*01	IGKV14-100*01	IGKV9-120*01	IGKV14-100*01	IGKV9-120*01	IGKV8-30*01	IGKV1-135*01 F	IGKV9-120*01 F	IGKV14-100*01	IGKV9-120*01	IGKV9-120*01	IGKV17-121*01	IGKV14-100*01	IGKV17-121*01	IGKV17-121*01	IGKV14-100*01	IGKV4-70*01	IGKV9-124*01	IGKV9-124*01	IGKV17-121*01
	IGKV9-120*01	IGKV14-100*01	IGKV9-120*01	IGKV14-100*01	IGKV9-120*01	IGKV9-120*01	IGKV1-135*01 F	IGKV9-120*01 F	IGKV14-100*01	IGKV9-120*01	IGKV9-120*01	IGKV17-121*01	IGKV14-100*01	IGKV17-121*01	IGKV4-91*01	IGKV14-100*01	IGKV4-70*01	IGKV9-124*01	IGKV9-124*01	IGKV17-121*01
	IGKV9-120*01	IGKV14-100*01	IGKV9-120*01	IGKV14-100*01	IGKV9-120*01	IGKV8-30*01	IGKV1-135*01 F	IGKV9-120*01 F	IGKV14-100*01	IGKV9-120*01	IGKV14-100*01	IGKV17-121*01	IGKV9-120*01	IGKV17-121*01	IGKV4-91*01	IGKV14-100*01	IGKV4-70*01	IGKV9-124*01	IGKV9-124*01	IGKV17-121*01
	IGKV9-120*01	IGKV14-100*01	IGKV9-120*01	IGKV14-100*01	IGKV9-120*01	IGKV8-30*01	IGKV1-135*01 F	IGKV9-120*01 F	IGKV14-100*01	IGKV9-120*01	IGKV9-120*01	IGKV17-121*01	IGKV14-100*01	IGKV17-121*01	IGKV4-91*01	IGKV14-100*01	IGKV4-70*01	IGKV9-124*01	IGKV9-124*01	IGKV17-121*01
	IGKV9-120*01	IGKV14-100*01	IGKV9-120*01	IGKV14-100*01	IGKV9-120*01	IGKV8-30*01	IGKV1-135*01 F	IGKV9-120*01 F	IGKV14-100*01	IGKV9-120*01	IGKV9-120*01	IGKV17-121*01	IGKV14-100*01	IGKV17-121*01	IGKV17-121*01	IGKV14-100*01	IGKV4-70*01	IGKV9-124*01	IGKV9-124*01	IGKV17-121*01
	IGKV9-120*01	IGKV14-100*01	IGKV9-120*01	IGKV14-100*01	IGKV9-120*01	IGKV8-30*01	IGKV1-135*01 F	IGKV9-120*01 F	IGKV14-100*01	IGKV9-120*01	IGKV9-120*01	IGKV17-121*01	IGKV9-120*01	IGKV17-121*01	IGKV17-121*01	IGKV14-100*01	IGKV4-70*01	IGKV9-124*01	IGKV9-124*01	IGKV17-121*01
	IGKV9-120*01	IGKV14-100*01	IGKV9-120*01	IGKV14-100*01	IGKV9-120*01	IGKV8-30*01	IGKV1-135*01 F	IGKV9-120*01 F	IGKV14-100*01	IGKV9-120*01	IGKV14-100*01	IGKV17-121*01	IGKV14-100*01	IGKV17-121*01	IGKV17-121*01	IGKV14-100*01	IGKV4-70*01	IGKV9-124*01	IGKV9-124*01	IGKV17-121*01
	IGKV9-120*01	IGKV14-100*01	IGKV9-120*01	IGKV14-100*01	IGKV9-120*01	IGKV9-120*01	IGKV1-135*01 F	IGKV9-120*01 F	IGKV14-100*01	IGKV9-120*01	IGKV14-100*01	IGKV17-121*01	IGKV9-120*01	IGKV17-121*01	IGKV4-91*01	IGKV14-100*01	IGKV4-70*01	IGKV9-124*01	IGKV9-124*01	IGKV17-121*01
	IGKV9-120*01	IGKV14-100*01	IGKV9-120*01	IGKV14-100*01	IGKV9-120*01	IGKV9-120*01	IGKV1-135*01 F	IGKV9-120*01 F	IGKV14-100*01	IGKV9-120*01	IGKV9-120*01	IGKV17-121*01	IGKV14-100*01	IGKV17-121*01	IGKV4-91*01	IGKV14-100*01	IGKV4-70*01	IGKV9-124*01	IGKV9-124*01	IGKV17-121*01
	IGKV9-120*01	IGKV14-100*01	IGKV9-120*01	IGKV14-100*01	IGKV9-120*01	IGKV8-30*01	IGKV1-135*01 F	IGKV9-120*01 F	IGKV14-100*01	IGKV9-120*01	IGKV14-100*01	IGKV17-121*01	IGKV14-100*01	IGKV17-121*01	IGKV4-91*01	IGKV14-100*01	IGKV4-70*01	IGKV9-124*01	IGKV9-124*01	IGKV17-121*01
	IGKV9-120*01	IGKV14-100*01	IGKV9-120*01	IGKV14-100*01	IGKV9-120*01	IGKV8-30*01	IGKV1-135*01 F	IGKV9-120*01 F	IGKV14-100*01	IGKV9-120*01	IGKV14-100*01	IGKV17-121*01	IGKV14-100*01	IGKV17-121*01	IGKV4-91*01	IGKV14-100*01	IGKV4-70*01	IGKV9-124*01	IGKV9-124*01	IGKV17-121*01
	IGKV9-120*01	IGKV14-100*01	IGKV9-120*01	IGKV14-100*01	IGKV9-120*01	IGKV8-30*01	IGKV1-135*01 F	IGKV9-120*01 F	IGKV1-135*01	IGKV9-120*01	IGKV14-100*01	IGKV17-121*01	IGKV9-120*01	IGKV17-121*01	IGKV4-91*01	IGKV14-100*01	IGKV4-70*01	IGKV9-124*01	IGKV9-124*01	IGKV17-121*01
	IGKV9-120*01	IGKV14-100*01	IGKV9-120*01	IGKV14-100*01	IGKV9-120*01	IGKV8-30*01	IGKV1-135*01 F	IGKV9-120*01 F	IGKV17-121*01	IGKV9-120*01	IGKV9-120*01	IGKV17-121*01	IGKV14-100*01	IGKV17-121*01	IGKV17-121*01	IGKV14-100*01	IGKV4-70*01	IGKV9-124*01	IGKV9-124*01	IGKV17-121*01
	IGKV9-120*01	IGKV14-100*01	IGKV9-120*01	IGKV14-100*01	IGKV9-120*01	IGKV8-30*01	IGKV1-135*01 F	IGKV9-120*01 F	IGKV14-100*01	IGKV9-120*01	IGKV9-120*01	IGKV17-121*01	IGKV14-100*01	IGKV17-121*01	IGKV4-91*01	IGKV14-100*01	IGKV4-70*01	IGKV9-124*01	IGKV9-124*01	IGKV17-121*01
	IGKV9-120*01	IGKV14-100*01	IGKV9-120*01	IGKV14-100*01	IGKV9-120*01	IGKV8-30*01	IGKV1-135*01 F	IGKV9-120*01 F	IGKV14-100*01	IGKV9-120*01	IGKV14-100*01	IGKV17-121*01	IGKV14-100*01	IGKV17-121*01	IGKV4-91*01	IGKV14-100*01	IGKV4-70*01	IGKV9-124*01	IGKV9-124*01	IGKV17-121*01
	IGKV9-120*01	IGKV14-100*01	IGKV9-120*01	IGKV14-100*01	IGKV9-120*01	IGKV8-30*01	IGKV1-135*01 F	IGKV9-120*01 F	IGKV14-100*01	IGKV9-120*01	IGKV14-100*01	IGKV17-121*01	IGKV14-100*01	IGKV17-121*01	IGKV17-121*01	IGKV14-100*01	IGKV4-70*01	IGKV9-124*01	IGKV9-124*01	IGKV17-121*01
	IGKV9-120*01	IGKV14-100*01	IGKV9-120*01	IGKV14-100*01	IGKV9-120*01	IGKV8-30*01	IGKV1-135*01 F	IGKV9-120*01 F	IGKV14-100*01	IGKV9-120*01	IGKV14-100*01	IGKV17-121*01	IGKV14-100*01	IGKV17-121*01	IGKV17-121*01	IGKV14-100*01	IGKV4-70*01	IGKV9-124*01	IGKV9-124*01	IGKV17-121*01
	IGKV9-120*01	IGKV14-100*01	IGKV9-120*01	IGKV14-100*01	IGKV9-120*01	IGKV9-120*01	IGKV1-135*01 F	IGKV1-135*01 F	IGKV14-100*01	IGKV9-120*01	IGKV14-100*01	IGKV17-121*01	IGKV14-100*01	IGKV17-121*01	IGKV17-121*01	IGKV14-100*01	IGKV4-70*01	IGKV9-124*01	IGKV9-124*01	IGKV17-121*01
	IGKV9-120*01	IGKV14-100*01	IGKV9-120*01	IGKV14-100*01	IGKV9-120*01	IGKV8-30*01	IGKV1-135*01 F	IGKV9-120*01 F	IGKV14-100*01	IGKV9-120*01	IGKV14-100*01	IGKV17-121*01	IGKV14-100*01	IGKV17-121*01	IGKV17-121*01	IGKV14-100*01	IGKV4-70*01	IGKV9-124*01	IGKV9-124*01	IGKV17-121*01
	IGKV9-120*01	IGKV14-100*01	IGKV9-120*01	IGKV14-100*01	IGKV9-120*01	IGKV8-30*01	IGKV1-135*01 F	IGKV9-120*01 F	IGKV14-100*01	IGKV9-120*01	IGKV9-120*01	IGKV17-121*01	IGKV14-100*01	IGKV17-121*01	IGKV17-121*01	IGKV14-100*01	IGKV4-70*01	IGKV9-124*01	IGKV9-124*01	IGKV17-121*01
	IGKV9-120*01	IGKV14-100*01	IGKV9-120*01	IGKV14-100*01	IGKV9-120*01	IGKV8-30*01	IGKV1-135*01 F	IGKV9-120*01 F	IGKV14-100*01	IGKV9-120*01	IGKV14-100*01	IGKV17-121*01	IGKV9-120*01	IGKV17-121*01	IGKV17-121*01	IGKV14-100*01	IGKV4-70*01	IGKV9-124*01	IGKV9-124*01	IGKV17-121*01
	IGKV9-120*01	IGKV14-100*01	IGKV9-120*01	IGKV14-100*01	IGKV9-120*01	IGKV8-30*01	IGKV1-135*01 F	IGKV14-111*01 F	IGKV14-100*01	IGKV9-120*01	IGKV14-100*01	IGKV17-121*01	IGKV9-120*01	IGKV17-121*01	IGKV17-121*01	IGKV14-100*01	IGKV4-70*01	IGKV9-124*01	IGKV9-124*01	IGKV17-121*01
	IGKV9-120*01	IGKV14-100*01	IGKV9-120*01	IGKV14-100*01	IGKV9-120*01	IGKV8-30*01	IGKV1-135*01 F	IGKV9-120*01 F	IGKV14-100*01	IGKV9-120*01	IGKV14-100*01	IGKV17-121*01	IGKV9-120*01	IGKV17-121*01	IGKV17-121*01	IGKV14-100*01	IGKV4-70*01	IGKV9-124*01	IGKV9-124*01	IGKV17-121*01
	IGKV9-120*01	IGKV14-100*01	IGKV9-120*01	IGKV14-100*01	IGKV9-120*01	IGKV8-30*01	IGKV14-111*01 F	IGKV9-120*01 F	IGKV14-100*01	IGKV9-120*01	IGKV14-100*01	IGKV17-121*01	IGKV14-100*01	IGKV17-121*01	IGKV17-121*01	IGKV14-100*01	IGKV4-70*01	IGKV9-124*01	IGKV9-124*01	IGKV17-121*01
	IGKV9-120*01	IGKV14-100*01	IGKV9-120*01	IGKV14-100*01	IGKV9-120*01	IGKV9-120*01	IGKV14-111*01 F	IGKV9-120*01 F	IGKV14-100*01	IGKV9-120*01	IGKV14-100*01	IGKV17-121*01	IGKV14-100*01	IGKV17-121*01	IGKV4-91*01	IGKV14-100*01	IGKV4-70*01	IGKV9-124*01	IGKV9-124*01	IGKV17-121*01
	IGKV9-120*01	IGKV14-100*01	IGKV9-120*01	IGKV14-100*01	IGKV9-120*01	IGKV8-30*01	IGKV14-111*01 F	IGKV9-120*01 F	IGKV14-100*01	IGKV9-120*01	IGKV9-120*01	IGKV17-121*01	IGKV14-100*01	IGKV17-121*01	IGKV4-91*01	IGKV14-100*01	IGKV4-70*01	IGKV9-124*01	IGKV9-124*01	IGKV17-121*01
	IGKV9-120*01	IGKV14-100*01	IGKV9-120*01	IGKV14-100*01	IGKV9-120*01	IGKV8-30*01	IGKV14-111*01 F	IGKV9-120*01 F	IGKV14-100*01	IGKV9-120*01	IGKV9-120*01	IGKV17-121*01	IGKV9-120*01	IGKV17-121*01	IGKV4-91*01	IGKV14-100*01	IGKV4-70*01	IGKV9-124*01	IGKV9-124*01	IGKV17-121*01
	IGKV9-120*01	IGKV14-100*01	IGKV9-120*01	IGKV14-100*01	IGKV9-120*01	IGKV8-30*01	IGKV14-111*01 F	IGKV9-120*01 F	IGKV14-100*01	IGKV9-120*01	IGKV14-100*01	IGKV17-121*01	IGKV9-120*01	IGKV17-121*01	IGKV4-91*01	IGKV14-100*01	IGKV4-70*01	IGKV9-124*01	IGKV9-124*01	IGKV17-121*01
	IGKV9-120*01	IGKV14-100*01	IGKV9-120*01	IGKV14-100*01	IGKV9-120*01	IGKV8-30*01	IGKV14-111*01 F	IGKV9-120*01 F	IGKV14-100*01	IGKV9-120*01	IGKV14-100*01	IGKV17-121*01	IGKV14-100*01	IGKV17-121*01	IGKV17-121*01	IGKV14-100*01	IGKV4-70*01	IGKV9-124*01	IGKV9-124*01	IGKV17-121*01
	IGKV9-120*01	IGKV14-100*01	IGKV9-120*01	IGKV14-100*01	IGKV9-120*01	IGKV8-30*01	IGKV14-111*01 F	IGKV14-111*01 F	IGKV14-100*01	IGKV9-120*01	IGKV14-100*01	IGKV17-121*01	IGKV14-100*01	IGKV17-121*01	IGKV4-91*01	IGKV14-100*01	IGKV4-70*01	IGKV9-124*01	IGKV9-124*01	IGKV17-121*01
	IGKV9-120*01	IGKV14-100*01	IGKV9-120*01	IGKV14-100*01	IGKV9-120*01	IGKV9-120*01	IGKV14-111*01 F	IGKV9-120*01 F	IGKV4-79*01	IGKV9-120*01	IGKV14-100*01	IGKV17-121*01	IGKV14-100*01	IGKV17-121*01	IGKV4-91*01	IGKV14-100*01	IGKV4-70*01	IGKV9-124*01	IGKV9-124*01	IGKV17-121*01
	IGKV9-120*01	IGKV14-100*01	IGKV9-120*01	IGKV14-100*01	IGKV9-120*01	IGKV8-30*01	IGKV14-111*01 F	IGKV1-135*01 F	IGKV4-91*01	IGKV9-120*01	IGKV14-100*01	IGKV17-121*01	IGKV9-120*01	IGKV17-121*01	IGKV17-121*01	IGKV14-100*01	IGKV4-70*01	IGKV9-124*01	IGKV9-124*01	IGKV17-121*01
	IGKV9-120*01	IGKV14-100*01	IGKV9-120*01	IGKV14-100*01	IGKV9-120*01	IGKV8-30*01	IGKV14-111*01 F	IGKV9-120*01 F	IGKV1-135*01	IGKV9-120*01	IGKV14-100*01	IGKV17-121*01	IGKV14-100*01	IGKV17-121*01	IGKV17-121*01	IGKV14-100*01	IGKV4-70*01	IGKV9-124*01	IGKV9-124*01	IGKV17-121*01
	IGKV9-120*01	IGKV14-100*01	IGKV9-120*01	IGKV14-100*01	IGKV9-120*01	IGKV8-30*01	IGKV14-111*01 F	IGKV9-120*01 F	IGKV1-135*01	IGKV9-120*01	IGKV9-120*01	IGKV9-120*01	IGKV9-120*01	IGKV17-121*01	IGKV17-121*01	IGKV14-100*01	IGKV4-70*01	IGKV9-124*01	IGKV9-124*01	IGKV17-121*01
	IGKV9-120*01	IGKV14-100*01	IGKV9-120*01	IGKV14-100*01	IGKV9-120*01	IGKV8-30*01	IGKV14-111*01 F	IGKV9-120*01 F	IGKV14-100*01	IGKV9-120*01	IGKV14-100*01	IGKV17-121*01	IGKV14-100*01	IGKV17-121*01	IGKV4-91*01	IGKV14-100*01	IGKV4-70*01	IGKV9-124*01	IGKV9-124*01	IGKV17-121*01
	IGKV9-120*01	IGKV14-100*01	IGKV9-120*01	IGKV14-100*01	IGKV9-120*01	IGKV8-30*01	IGKV14-111*01 F	IGKV9-120*01 F	IGKV1-135*01	IGKV9-120*01	IGKV14-100*01	IGKV17-121*01	IGKV14-100*01	IGKV17-121*01	IGKV17-121*01	IGKV14-100*01	IGKV4-70*01	IGKV9-124*01	IGKV9-124*01	IGKV17-121*01
	IGKV9-120*01	IGKV14-100*01	IGKV9-120*01	IGKV14-100*01	IGKV9-120*01	IGKV8-30*01	IGKV14-111*01 F	IGKV9-120*01 F	IGKV14-100*01	IGKV9-120*01	IGKV14-100*01	IGKV17-121*01	IGKV14-100*01	IGKV17-121*01	IGKV4-91*01	IGKV14-100*01	IGKV4-70*01	IGKV9-124*01	IGKV9-124*01	IGKV17-121*01
	IGKV9-120*01	IGKV14-100*01	IGKV9-120*01	IGKV14-100*01	IGKV9-120*01	IGKV8-30*01	IGKV14-111*01 F	IGKV9-120*01 F	IGKV14-100*01	IGKV9-120*01	IGKV14-100*01	IGKV17-121*01	IGKV9-120*01	IGKV17-121*01	IGKV4-91*01	IGKV14-100*01	IGKV4-70*01	IGKV9-124*01	IGKV9-124*01	IGKV17-121*01
	IGKV9-120*01	IGKV14-100*01	IGKV9-120*01	IGKV14-100*01	IGKV9-120*01	IGKV9-120*01	IGKV14-111*01 F	IGKV9-120*01 F	IGKV14-100*01	IGKV9-120*01	IGKV14-100*01	IGKV17-121*01	IGKV14-100*01	IGKV17-121*01	IGKV4-91*01	IGKV14-100*01	IGKV4-70*01	IGKV9-124*01	IGKV9-124*01	IGKV17-121*01
	IGKV9-120*01	IGKV14-100*01	IGKV9-120*01	IGKV14-100*01	IGKV9-120*01	IGKV8-30*01	IGKV14-111*01 F	IGKV9-120*01 F	IGKV14-100*01	IGKV9-120*01	IGKV14-100*01	IGKV17-121*01	IGKV14-100*01	IGKV17-121*01	IGKV4-91*01	IGKV14-100*01	IGKV4-70*01	IGKV9-124*01	IGKV9-124*01	IGKV17-121*01
	IGKV9-120*01	IGKV14-100*01	IGKV9-120*01	IGKV14-100*01	IGKV9-120*01	IGKV8-30*01	IGKV14-111*01 F	IGKV9-120*01 F	IGKV14-100*01	IGKV9-120*01	IGKV14-100*01	IGKV17-121*01	IGKV14-100*01	IGKV17-121*01	IGKV17-121*01	IGKV14-100*01	IGKV4-70*01	IGKV9-124*01	IGKV9-124*01	IGKV17-121*01
	IGKV9-120*01	IGKV14-100*01	IGKV9-120*01	IGKV14-100*01	IGKV9-120*01	IGKV8-30*01	IGKV14-111*01 F	IGKV9-120*01 F	IGKV14-100*01	IGKV9-120*01	IGKV9-120*01	IGKV17-121*01	IGKV14-100*01	IGKV17-121*01	IGKV17-121*01	IGKV14-100*01	IGKV4-70*01	IGKV9-124*01	IGKV9-124*01	IGKV17-121*01
	IGKV9-120*01	IGKV14-100*01	IGKV9-120*01	IGKV14-100*01	IGKV9-120*01	IGKV8-30*01	IGKV14-111*01 F	IGKV9-120*01 F	IGKV14-100*01	IGKV9-120*01	IGKV9-120*01	IGKV17-121*01	IGKV14-100*01	IGKV17-121*01	IGKV17-121*01	IGKV14-100*01	IGKV4-70*01	IGKV9-124*01	IGKV9-124*01	IGKV17-121*01
	IGKV9-120*01	IGKV14-100*01	IGKV9-120*01	IGKV14-100*01	IGKV9-120*01	IGKV9-120*01	IGKV14-111*01 F	IGKV1-135*01 F	IGKV14-100*01	IGKV9-120*01	IGKV14-100*01	IGKV17-121*01	IGKV14-100*01	IGKV17-121*01	IGKV17-121*01	IGKV14-100*01	IGKV4-70*01	IGKV9-124*01	IGKV9-124*01	IGKV17-121*01
	IGKV9-120*01	IGKV14-100*01	IGKV9-120*01	IGKV14-100*01	IGKV9-120*01	IGKV8-30*01	IGKV14-111*01 F	IGKV9-120*01 F	IGKV14-100*01	IGKV9-120*01	IGKV9-120*01	IGKV17-121*01	IGKV14-100*01	IGKV17-121*01	IGKV4-91*01	IGKV14-100*01	IGKV4-70*01	IGKV9-124*01	IGKV9-124*01	IGKV17-121*01
	IGKV9-120*01	IGKV14-100*01	IGKV9-120*01	IGKV14-100*01	IGKV9-120*01	IGKV8-30*01	IGKV14-111*01 F	IGKV9-120*01 F	IGKV17-121*01	IGKV9-120*01	IGKV14-100*01	IGKV17-121*01	IGKV14-100*01	IGKV17-121*01	IGKV4-91*01	IGKV14-100*01	IGKV4-70*01	IGKV9-124*01	IGKV9-124*01	IGKV17-121*01
	IGKV9-120*01	IGKV14-100*01	IGKV9-120*01	IGKV14-100*01	IGKV9-120*01	IGKV8-30*01	IGKV14-111*01 F	IGKV9-120*01 F	IGKV14-100*01	IGKV9-120*01	IGKV14-100*01	IGKV17-121*01	IGKV14-100*01	IGKV17-121*01	IGKV17-121*01	IGKV14-100*01	IGKV4-70*01	IGKV9-124*01	IGKV9-124*01	IGKV17-121*01
	IGKV9-120*01	IGKV14-100*01	IGKV9-120*01	IGKV14-100*01	IGKV9-120*01	IGKV8-30*01	IGKV14-111*01 F	IGKV9-120*01 F	IGKV14-100*01	IGKV9-120*01	IGKV14-100*01	IGKV17-121*01	IGKV14-100*01	IGKV17-121*01	IGKV4-91*01	IGKV14-100*01	IGKV4-70*01	IGKV9-124*01	IGKV9-124*01	IGKV17-121*01
	IGKV9-120*01	IGKV14-100*01	IGKV9-120*01	IGKV14-100*01	IGKV9-120*01	IGKV8-30*01	IGKV14-111*01 F	IGKV9-120*01 F	IGKV14-100*01	IGKV9-120*01	IGKV9-120*01	IGKV17-121*01	IGKV9-120*01	IGKV17-121*01	IGKV4-91*01	IGKV14-100*01	IGKV4-70*01	IGKV9-124*01	IGKV9-124*01	IGKV17-121*01
	IGKV9-120*01	IGKV14-100*01	IGKV9-120*01	IGKV14-100*01	IGKV9-120*01	IGKV8-30*01	IGKV14-111*01 F	IGKV9-120*01 F	IGKV14-100*01	IGKV9-120*01	IGKV14-100*01	IGKV17-121*01	IGKV9-120*01	IGKV17-121*01	IGKV4-91*01	IGKV14-100*01	IGKV4-70*01	IGKV9-124*01	IGKV9-124*01	IGKV17-121*01
	IGKV9-120*01	IGKV14-100*01	IGKV9-120*01	IGKV14-100*01	IGKV9-120*01	IGKV8-30*01	IGKV14-111*01 F	IGKV9-120*01 F	IGKV14-100*01	IGKV9-120*01	IGKV14-100*01	IGKV17-121*01	IGKV9-120*01	IGKV17-121*01	IGKV4-91*01	IGKV14-100*01	IGKV4-70*01	IGKV9-124*01	IGKV9-124*01	IGKV17-121*01
	IGKV9-120*01	IGKV14-100*01	IGKV9-120*01	IGKV14-100*01	IGKV9-120*01	IGKV8-30*01	IGKV14-111*01 F	IGKV9-120*01 F	IGKV14-100*01	IGKV9-120*01	IGKV9-120*01	IGKV17-121*01	IGKV9-120*01	IGKV17-121*01	IGKV17-121*01	IGKV14-100*01	IGKV4-70*01	IGKV9-124*01	IGKV9-124*01	IGKV17-121*01
	IGKV9-120*01	IGKV14-100*01	IGKV9-120*01	IGKV14-100*01	IGKV9-120*01	IGKV8-30*01	IGKV14-111*01 F	IGKV9-120*01 F	IGKV14-100*01	IGKV9-120*01	IGKV14-100*01	IGKV17-121*01	IGKV9-120*01	IGKV17-121*01	IGKV17-121*01	IGKV14-100*01	IGKV4-70*01	IGKV9-124*01	IGKV9-124*01	IGKV17-121*01
	IGKV9-120*01	IGKV14-100*01	IGKV9-120*01	IGKV14-100*01	IGKV9-120*01	IGKV8-30*01	IGKV14-111*01 F	IGKV14-111*01 F	IGKV14-100*01	IGKV9-120*01	IGKV14-100*01	IGKV17-121*01	IGKV14-100*01	IGKV17-121*01	IGKV4-91*01	IGKV14-100*01	IGKV4-70*01	IGKV9-124*01	IGKV9-124*01	IGKV17-121*01
	IGKV9-120*01	IGKV14-100*01	IGKV9-120*01	IGKV14-100*01	IGKV9-120*01	IGKV9-120*01	IGKV14-111*01 F	IGKV9-120*01 F	IGKV14-100*01	IGKV9-120*01	IGKV14-100*01	IGKV17-121*01	IGKV14-100*01	IGKV17-121*01	IGKV4-91*01	IGKV14-100*01	IGKV4-70*01	IGKV9-124*01	IGKV9-124*01	IGKV17-121*01
	IGKV9-120*01	IGKV14-100*01	IGKV9-120*01	IGKV14-100*01	IGKV9-120*01	IGKV8-30*01	IGKV14-111*01 F	IGKV9-120*01 F	IGKV14-100*01	IGKV9-120*01	IGKV9-120*01	IGKV17-121*01	IGKV14-100*01	IGKV17-121*01	IGKV4-91*01	IGKV14-100*01	IGKV4-70*01	IGKV9-124*01	IGKV9-124*01	IGKV17-121*01
	IGKV9-120*01	IGKV14-100*01	IGKV9-120*01	IGKV14-100*01	IGKV9-120*01	IGKV8-30*01	IGKV14-111*01 F	IGKV9-120*01 F	IGKV14-100*01	IGKV9-120*01	IGKV9-120*01	IGKV17-121*01	IGKV14-100*01	IGKV17-121*01	IGKV17-121*01	IGKV14-100*01	IGKV4-70*01	IGKV9-124*01	IGKV9-124*01	IGKV17-121*01
	IGKV9-120*01	IGKV14-100*01	IGKV9-120*01	IGKV14-100*01	IGKV9-120*01	IGKV8-30*01	IGKV14-111*01 F	IGKV9-120*01 F	IGKV14-100*01	IGKV9-120*01	IGKV14-100*01	IGKV17-121*01	IGKV14-100*01	IGKV17-121*01	IGKV4-91*01	IGKV14-100*01	IGKV4-70*01	IGKV9-124*01	IGKV9-124*01	IGKV17-121*01
	IGKV9-120*01	IGKV14-100*01	IGKV9-120*01	IGKV14-100*01	IGKV9-120*01	IGKV8-30*01	IGKV14-111*01 F	IGKV9-120*01 F	IGKV14-100*01	IGKV9-120*01	IGKV9-120*01	IGKV9-120*01	IGKV14-100*01	IGKV17-121*01	IGKV17-121*01	IGKV14-100*01	IGKV4-70*01	IGKV9-124*01	IGKV9-124*01	IGKV17-121*01
	IGKV9-120*01	IGKV14-100*01	IGKV9-120*01	IGKV14-100*01	IGKV9-120*01	IGKV8-30*01	IGKV14-111*01 F	IGKV9-120*01 F	IGKV14-100*01	IGKV9-120*01	IGKV14-100*01	IGKV17-121*01	IGKV14-100*01	IGKV17-121*01	IGKV4-91*01	IGKV14-100*01	IGKV4-70*01	IGKV9-124*01	IGKV9-124*01	IGKV17-121*01
	IGKV9-120*01	IGKV14-100*01	IGKV9-120*01	IGKV14-100*01	IGKV9-120*01	IGKV8-30*01	IGKV14-111*01 F	IGKV9-120*01 F	IGKV14-100*01	IGKV9-120*01	IGKV14-100*01	IGKV17-121*01	IGKV14-100*01	IGKV17-121*01	IGKV17-121*01	IGKV14-100*01	IGKV4-70*01	IGKV9-124*01	IGKV9-124*01	IGKV17-121*01
	IGKV9-120*01	IGKV14-100*01	IGKV9-120*01	IGKV14-100*01	IGKV9-120*01	IGKV8-30*01	IGKV14-111*01 F	IGKV9-120*01 F	IGKV14-100*01	IGKV9-120*01	IGKV14-100*01	IGKV17-121*01	IGKV9-120*01	IGKV17-121*01	IGKV17-121*01	IGKV14-100*01	IGKV4-70*01	IGKV9-124*01	IGKV9-124*01	IGKV17-121*01
	IGKV9-120*01	IGKV14-100*01	IGKV9-120*01	IGKV14-100*01	IGKV9-120*01	IGKV8-30*01	IGKV14-111*01 F	IGKV9-120*01 F	IGKV14-100*01	IGKV9-120*01	IGKV9-120*01	IGKV17-121*01	IGKV9-120*01	IGKV17-121*01	IGKV4-91*01	IGKV14-100*01	IGKV4-70*01	IGKV9-124*01	IGKV9-124*01	IGKV17-121*01
	IGKV9-120*01	IGKV14-100*01	IGKV9-120*01	IGKV14-100*01	IGKV9-120*01	IGKV8-30*01	IGKV14-111*01 F	IGKV9-120*01 F	IGKV14-100*01	IGKV9-120*01	IGKV14-100*01	IGKV17-121*01	IGKV14-100*01	IGKV17-121*01	IGKV4-91*01	IGKV14-100*01	IGKV4-70*01	IGKV9-124*01	IGKV9-124*01	IGKV17-121*01
	IGKV9-120*01	IGKV14-100*01	IGKV9-120*01	IGKV14-100*01	IGKV9-120*01	IGKV9-120*01	IGKV14-111*01 F	IGKV9-120*01 F	IGKV14-100*01	IGKV9-120*01	IGKV14-100*01	IGKV17-121*01	IGKV14-100*01	IGKV17-121*01	IGKV17-121*01	IGKV14-100*01	IGKV4-70*01	IGKV9-124*01	IGKV9-124*01	IGKV17-121*01
	IGKV9-120*01	IGKV14-100*01	IGKV9-120*01	IGKV14-100*01	IGKV9-120*01	IGKV8-30*01	IGKV14-111*01 F	IGKV9-120*01 F	IGKV3-4*01	IGKV9-120*01	IGKV14-100*01	IGKV17-121*01	IGKV14-100*01	IGKV17-121*01	IGKV4-91*01	IGKV14-100*01	IGKV4-70*01	IGKV9-124*01	IGKV9-124*01	IGKV17-121*01
	IGKV9-120*01	IGKV14-100*01	IGKV9-120*01	IGKV14-100*01	IGKV9-120*01	IGKV8-30*01	IGKV14-111*01 F	IGKV9-120*01 F	IGKV14-100*01	IGKV9-120*01	IGKV9-120*01	IGKV17-121*01	IGKV14-100*01	IGKV17-121*01	IGKV17-121*01	IGKV14-100*01	IGKV4-70*01	IGKV9-124*01	IGKV9-124*01	IGKV17-121*01
	IGKV9-120*01	IGKV14-100*01	IGKV9-120*01	IGKV14-100*01	IGKV9-120*01	IGKV8-30*01	IGKV14-111*01 F	IGKV9-120*01 F	IGKV14-100*01	IGKV9-120*01	IGKV14-100*01	IGKV17-121*01	IGKV14-100*01	IGKV17-121*01	IGKV17-121*01	IGKV14-100*01	IGKV4-70*01	IGKV9-124*01	IGKV9-124*01	IGKV17-121*01
	IGKV9-120*01	IGKV14-100*01	IGKV9-120*01	IGKV14-100*01	IGKV9-120*01	IGKV8-30*01	IGKV14-111*01 F	IGKV9-120*01 F	IGKV14-100*01	IGKV9-120*01	IGKV9-120*01	IGKV17-121*01	IGKV14-100*01	IGKV17-121*01	IGKV17-121*01	IGKV14-100*01	IGKV4-70*01	IGKV9-124*01	IGKV9-124*01	IGKV17-121*01
	IGKV9-120*01	IGKV14-100*01	IGKV9-120*01	IGKV14-100*01	IGKV9-120*01	IGKV9-120*01	IGKV14-111*01 F	IGKV9-120*01 F	IGKV14-100*01	IGKV9-120*01	IGKV9-120*01	IGKV17-121*01	IGKV14-100*01	IGKV17-121*01	IGKV17-121*01	IGKV14-100*01	IGKV4-70*01	IGKV9-124*01	IGKV9-124*01	IGKV17-121*01
	IGKV9-120*01	IGKV14-100*01	IGKV9-120*01	IGKV14-100*01	IGKV9-120*01	IGKV8-30*01	IGKV14-111*01 F	IGKV1-135*01 F	IGKV1-135*01	IGKV9-120*01	IGKV14-100*01	IGKV17-121*01	IGKV14-100*01	IGKV17-121*01	IGKV4-91*01	IGKV14-100*01	IGKV4-70*01	IGKV9-124*01	IGKV9-124*01	IGKV17-121*01
	IGKV9-120*01	IGKV14-100*01	IGKV9-120*01	IGKV14-100*01	IGKV9-120*01	IGKV8-30*01	IGKV14-111*01 F	IGKV9-120*01 F	IGKV1-135*01	IGKV9-120*01	IGKV9-120*01	IGKV17-121*01	IGKV14-100*01	IGKV17-121*01	IGKV4-91*01	IGKV14-100*01	IGKV4-70*01	IGKV9-124*01	IGKV9-124*01	IGKV17-121*01
	IGKV9-120*01	IGKV14-100*01	IGKV9-120*01	IGKV14-100*01	IGKV9-120*01	IGKV8-30*01	IGKV14-111*01 F	IGKV9-120*01 F	IGKV14-100*01	IGKV9-120*01	IGKV9-120*01	IGKV17-121*01	IGKV9-120*01	IGKV17-121*01	IGKV17-121*01	IGKV14-100*01	IGKV4-70*01	IGKV9-124*01	IGKV9-124*01	IGKV17-121*01
	IGKV9-120*01	IGKV14-100*01	IGKV9-120*01	IGKV14-100*01	IGKV9-120*01	IGKV8-30*01	IGKV14-111*01 F	IGKV9-120*01 F	IGKV14-100*01	IGKV9-120*01	IGKV9-120*01	IGKV17-121*01	IGKV9-120*01	IGKV17-121*01	IGKV4-91*01	IGKV14-100*01	IGKV4-70*01	IGKV9-124*01	IGKV9-124*01	IGKV17-121*01
	IGKV9-120*01	IGKV14-100*01	IGKV9-120*01	IGKV14-100*01	IGKV9-120*01	IGKV9-120*01	IGKV14-111*01 F	IGKV9-120*01 F	IGKV14-100*01	IGKV9-120*01	IGKV14-100*01	IGKV17-121*01	IGKV14-100*01	IGKV17-121*01	IGKV17-121*01	IGKV14-100*01	IGKV4-70*01	IGKV9-124*01	IGKV9-124*01	IGKV17-121*01
	IGKV9-120*01	IGKV14-100*01	IGKV9-120*01	IGKV14-100*01	IGKV9-120*01	IGKV9-120*01	IGKV14-111*01 F	IGKV9-120*01 F	IGKV14-100*01	IGKV9-120*01	IGKV9-120*01	IGKV17-121*01	IGKV9-120*01	IGKV17-121*01	IGKV4-91*01	IGKV14-100*01	IGKV4-70*01	IGKV9-124*01	IGKV9-124*01	IGKV17-121*01
	IGKV9-120*01	IGKV14-100*01	IGKV9-120*01	IGKV14-100*01	IGKV9-120*01	IGKV8-30*01	IGKV14-111*01 F	IGKV9-120*01 F	IGKV14-100*01	IGKV9-120*01	IGKV9-120*01	IGKV17-121*01	IGKV14-100*01	IGKV17-121*01	IGKV17-121*01	IGKV14-100*01	IGKV4-70*01	IGKV9-124*01	IGKV9-124*01	IGKV17-121*01
	IGKV9-120*01	IGKV14-100*01	IGKV9-120*01	IGKV14-100*01	IGKV9-120*01	IGKV9-120*01	IGKV14-111*01 F	IGKV9-120*01 F	IGKV14-100*01	IGKV9-120*01	IGKV14-100*01	IGKV17-121*01	IGKV14-100*01	IGKV17-121*01	IGKV4-91*01	IGKV14-100*01	IGKV4-70*01	IGKV9-124*01	IGKV9-124*01	IGKV17-121*01
	IGKV9-120*01	IGKV14-100*01	IGKV9-120*01	IGKV14-100*01	IGKV9-120*01	IGKV8-30*01	IGKV14-111*01 F	IGKV9-120*01 F	IGKV14-100*01	IGKV9-120*01	IGKV9-120*01	IGKV17-121*01	IGKV14-100*01	IGKV17-121*01	IGKV17-121*01	IGKV14-100*01	IGKV4-70*01	IGKV9-124*01	IGKV9-124*01	IGKV17-121*01
	IGKV9-120*01	IGKV14-100*01	IGKV9-120*01	IGKV14-100*01	IGKV9-120*01	IGKV9-120*01	IGKV14-111*01 F	IGKV9-120*01 F	IGKV14-100*01	IGKV9-120*01	IGKV14-100*01	IGKV17-121*01	IGKV14-100*01	IGKV17-121*01	IGKV17-121*01	IGKV14-100*01	IGKV4-70*01	IGKV9-124*01	IGKV9-124*01	IGKV17-121*01
	IGKV9-120*01	IGKV14-100*01	IGKV9-120*01	IGKV14-100*01	IGKV9-120*01	IGKV9-120*01	IGKV14-111*01 F	IGKV9-120*01 F	IGKV3-4*01	IGKV9-120*01	IGKV9-120*01	IGKV17-121*01	IGKV9-120*01	IGKV17-121*01	IGKV4-91*01	IGKV14-100*01	IGKV4-70*01	IGKV9-124*01	IGKV9-124*01	IGKV17-121*01
	IGKV9-120*01	IGKV14-100*01	IGKV9-120*01	IGKV14-100*01	IGKV9-120*01	IGKV9-120*01	IGKV14-111*01 F	IGKV14-111*01 F	IGKV14-100*01	IGKV9-120*01	IGKV14-100*01	IGKV17-121*01	IGKV14-100*01	IGKV17-121*01	IGKV4-91*01	IGKV14-100*01	IGKV4-70*01	IGKV9-124*01	IGKV9-124*01	IGKV17-121*01
	IGKV9-120*01	IGKV14-100*01	IGKV9-120*01	IGKV14-100*01	IGKV9-120*01	IGKV9-120*01	IGKV14-111*01 F	IGKV9-120*01 F	IGKV14-100*01	IGKV9-120*01	IGKV9-120*01	IGKV17-121*01	IGKV14-100*01	IGKV17-121*01	IGKV4-91*01	IGKV14-100*01	IGKV4-70*01	IGKV9-124*01	IGKV9-124*01	IGKV17-121*01
	IGKV9-120*01	IGKV14-100*01	IGKV9-120*01	IGKV14-100*01	IGKV9-120*01	IGKV9-120*01	IGKV14-111*01 F	IGKV9-120*01 F	IGKV14-100*01	IGKV9-120*01	IGKV14-100*01	IGKV17-121*01	IGKV9-120*01	IGKV17-121*01	IGKV4-91*01	IGKV14-100*01	IGKV4-70*01	IGKV9-124*01	IGKV9-124*01	IGKV17-121*01
	IGKV9-120*01	IGKV14-100*01	IGKV9-120*01	IGKV14-100*01	IGKV9-120*01	IGKV8-30*01	IGKV14-111*01 F	IGKV9-120*01 F	IGKV1-135*01	IGKV9-120*01	IGKV14-100*01	IGKV17-121*01	IGKV9-120*01	IGKV17-121*01	IGKV4-91*01	IGKV14-100*01	IGKV4-70*01	IGKV9-124*01	IGKV9-124*01	IGKV17-121*01
	IGKV9-120*01	IGKV14-100*01	IGKV9-120*01	IGKV14-100*01	IGKV9-120*01	IGKV8-30*01	IGKV14-111*01 F	IGKV1-135*01 F	IGKV17-121*01	IGKV9-120*01	IGKV14-100*01	IGKV17-121*01	IGKV9-120*01	IGKV17-121*01	IGKV4-91*01	IGKV14-100*01	IGKV4-70*01	IGKV9-124*01	IGKV9-124*01	IGKV17-121*01
	IGKV9-120*01	IGKV14-100*01	IGKV9-120*01	IGKV14-100*01	IGKV9-120*01	IGKV8-30*01	IGKV14-111*01 F	IGKV9-120*01 F	IGKV14-100*01	IGKV9-120*01	IGKV14-100*01	IGKV17-121*01	IGKV14-100*01	IGKV17-121*01	IGKV17-121*01	IGKV14-100*01	IGKV4-70*01	IGKV9-124*01	IGKV9-124*01	IGKV17-121*01
	IGKV9-120*01	IGKV14-100*01	IGKV9-120*01	IGKV14-100*01	IGKV9-120*01	IGKV8-30*01	IGKV14-111*01 F	IGKV9-120*01 F	IGKV14-100*01	IGKV9-120*01	IGKV9-120*01	IGKV17-121*01	IGKV9-120*01	IGKV17-121*01	IGKV4-91*01	IGKV14-100*01	IGKV4-70*01	IGKV9-124*01	IGKV9-124*01	IGKV17-121*01
	IGKV9-120*01	IGKV14-100*01	IGKV9-120*01	IGKV14-100*01	IGKV9-120*01	IGKV8-30*01	IGKV14-111*01 F	IGKV9-120*01 F	IGKV14-100*01	IGKV9-120*01	IGKV14-100*01	IGKV17-121*01	IGKV14-100*01	IGKV17-121*01	IGKV4-91*01	IGKV14-100*01	IGKV4-70*01	IGKV9-124*01	IGKV9-124*01	IGKV17-121*01
	IGKV9-120*01	IGKV14-100*01	IGKV9-120*01	IGKV14-100*01	IGKV9-120*01	IGKV8-30*01	IGKV14-111*01 F	IGKV9-120*01 F	IGKV14-100*01	IGKV9-120*01	IGKV9-120*01	IGKV17-121*01	IGKV14-100*01	IGKV17-121*01	IGKV17-121*01	IGKV14-100*01	IGKV4-70*01	IGKV9-124*01	IGKV9-124*01	IGKV17-121*01
	IGKV9-120*01	IGKV14-100*01	IGKV9-120*01	IGKV14-100*01	IGKV9-120*01	IGKV8-30*01	IGKV14-111*01 F	IGKV9-120*01 F	IGKV14-100*01	IGKV9-120*01	IGKV9-120*01	IGKV17-121*01	IGKV14-100*01	IGKV17-121*01	IGKV4-91*01	IGKV14-100*01	IGKV4-70*01	IGKV9-124*01	IGKV9-124*01	IGKV17-121*01
	IGKV9-120*01	IGKV14-100*01	IGKV9-120*01	IGKV14-100*01	IGKV9-120*01	IGKV8-30*01	IGKV14-111*01 F	IGKV9-120*01 F	IGKV17-121*01	IGKV9-120*01	IGKV14-100*01	IGKV17-121*01	IGKV14-100*01	IGKV17-121*01	IGKV4-91*01	IGKV14-100*01	IGKV4-70*01	IGKV9-124*01	IGKV9-124*01	IGKV17-121*01
	IGKV9-120*01	IGKV14-100*01	IGKV9-120*01	IGKV14-100*01	IGKV9-120*01	IGKV9-120*01	IGKV14-111*01 F	IGKV9-120*01 F	IGKV14-100*01	IGKV9-120*01	IGKV14-100*01	IGKV17-121*01	IGKV14-100*01	IGKV17-121*01	IGKV4-91*01	IGKV14-100*01	IGKV4-70*01	IGKV9-124*01	IGKV9-124*01	IGKV17-121*01
	IGKV9-120*01	IGKV14-100*01	IGKV9-120*01	IGKV14-100*01	IGKV9-120*01	IGKV8-30*01	IGKV14-111*01 F	IGKV1-135*01 F	IGKV4-91*01	IGKV9-120*01	IGKV14-100*01	IGKV17-121*01	IGKV14-100*01	IGKV17-121*01	IGKV4-91*01	IGKV14-100*01	IGKV4-70*01	IGKV9-124*01	IGKV9-124*01	IGKV17-121*01
	IGKV9-120*01	IGKV14-100*01	IGKV9-120*01	IGKV14-100*01	IGKV9-120*01	IGKV8-30*01	IGKV14-111*01 F	IGKV14-111*01 F	IGKV14-100*01	IGKV9-120*01	IGKV14-100*01	IGKV17-121*01	IGKV14-100*01	IGKV17-121*01	IGKV17-121*01	IGKV14-100*01	IGKV4-70*01	IGKV9-124*01	IGKV9-124*01	IGKV17-121*01
	IGKV9-120*01	IGKV14-100*01	IGKV9-120*01	IGKV14-100*01	IGKV9-120*01	IGKV8-30*01	IGKV14-111*01 F	IGKV9-120*01 F	IGKV14-100*01	IGKV9-120*01	IGKV14-100*01	IGKV17-121*01	IGKV9-120*01	IGKV17-121*01	IGKV4-91*01	IGKV14-100*01	IGKV4-70*01	IGKV9-124*01	IGKV9-124*01	IGKV17-121*01
	IGKV9-120*01	IGKV14-100*01	IGKV9-120*01	IGKV14-100*01	IGKV9-120*01	IGKV8-30*01	IGKV14-111*01 F	IGKV9-120*01 F	IGKV14-100*01	IGKV9-120*01	IGKV14-100*01	IGKV17-121*01	IGKV14-100*01	IGKV17-121*01	IGKV4-91*01	IGKV14-100*01	IGKV4-70*01	IGKV9-124*01	IGKV9-124*01	IGKV17-121*01
	IGKV9-120*01	IGKV14-100*01	IGKV9-120*01	IGKV14-100*01	IGKV9-120*01	IGKV8-30*01	IGKV14-111*01 F	IGKV9-120*01 F	IGKV14-100*01	IGKV9-120*01	IGKV9-120*01	IGKV17-121*01	IGKV14-100*01	IGKV17-121*01	IGKV4-91*01	IGKV14-100*01	IGKV4-70*01	IGKV9-124*01	IGKV9-124*01	IGKV17-121*01
	IGKV9-120*01	IGKV14-100*01	IGKV9-120*01	IGKV14-100*01	IGKV9-120*01	IGKV9-120*01	IGKV14-111*01 F	IGKV9-120*01 F	IGKV14-100*01	IGKV9-120*01	IGKV14-100*01	IGKV17-121*01	IGKV14-100*01	IGKV17-121*01	IGKV4-91*01	IGKV14-100*01	IGKV4-70*01	IGKV9-124*01	IGKV9-124*01	IGKV17-121*01
	IGKV9-120*01	IGKV14-100*01	IGKV9-120*01	IGKV14-100*01	IGKV9-120*01	IGKV8-30*01	IGKV14-111*01 F	IGKV9-120*01 F	IGKV14-100*01	IGKV9-120*01	IGKV14-100*01	IGKV17-121*01	IGKV14-100*01	IGKV17-121*01	IGKV17-121*01	IGKV14-100*01	IGKV4-70*01	IGKV9-124*01	IGKV9-124*01	IGKV17-121*01
	IGKV9-120*01	IGKV14-100*01	IGKV9-120*01	IGKV14-100*01	IGKV9-120*01	IGKV8-30*01	IGKV14-111*01 F	IGKV9-120*01 F	IGKV4-57*01	IGKV9-120*01	IGKV14-100*01	IGKV17-121*01	IGKV14-100*01	IGKV17-121*01	IGKV4-91*01	IGKV14-100*01	IGKV4-70*01	IGKV9-124*01	IGKV9-124*01	IGKV17-121*01
	IGKV9-120*01	IGKV14-100*01	IGKV9-120*01	IGKV14-100*01	IGKV9-120*01	IGKV8-30*01	IGKV14-111*01 F	IGKV9-120*01 F	IGKV14-100*01	IGKV9-120*01	IGKV14-100*01	IGKV17-121*01	IGKV14-100*01	IGKV17-121*01	IGKV17-121*01	IGKV14-100*01	IGKV4-70*01	IGKV9-124*01	IGKV9-124*01	IGKV17-121*01
	IGKV9-120*01	IGKV14-100*01	IGKV9-120*01	IGKV14-100*01	IGKV9-120*01	IGKV8-30*01	IGKV14-111*01 F	IGKV9-120*01 F	IGKV14-100*01	IGKV9-120*01	IGKV14-100*01	IGKV17-121*01	IGKV14-100*01	IGKV17-121*01	IGKV4-91*01	IGKV14-100*01	IGKV4-70*01	IGKV9-124*01	IGKV9-124*01	IGKV17-121*01
	IGKV9-120*01	IGKV14-100*01	IGKV9-120*01	IGKV14-100*01	IGKV9-120*01	IGKV8-30*01	IGKV14-111*01 F	IGKV9-120*01 F	IGKV14-100*01	IGKV9-120*01	IGKV14-100*01	IGKV17-121*01	IGKV9-120*01	IGKV17-121*01	IGKV4-91*01	IGKV14-100*01	IGKV4-70*01	IGKV9-124*01	IGKV9-124*01	IGKV17-121*01
	IGKV9-120*01	IGKV14-100*01	IGKV9-120*01	IGKV14-100*01	IGKV9-120*01	IGKV9-120*01	IGKV14-111*01 F	IGKV14-111*01 F	IGKV14-100*01	IGKV9-120*01	IGKV9-120*01	IGKV17-121*01	IGKV9-120*01	IGKV17-121*01	IGKV17-121*01	IGKV14-100*01	IGKV4-70*01	IGKV9-124*01	IGKV9-124*01	IGKV17-121*01
	IGKV9-120*01	IGKV14-100*01	IGKV9-120*01	IGKV14-100*01	IGKV9-120*01	IGKV8-30*01	IGKV14-111*01 F	IGKV14-111*01 F	IGKV14-100*01	IGKV9-120*01	IGKV14-100*01	IGKV17-121*01	IGKV9-120*01	IGKV17-121*01	IGKV17-121*01	IGKV14-100*01	IGKV4-70*01	IGKV9-124*01	IGKV9-124*01	IGKV17-121*01
	IGKV9-120*01	IGKV14-100*01	IGKV9-120*01	IGKV14-100*01	IGKV9-120*01	IGKV8-30*01	IGKV14-111*01 F	IGKV9-120*01 F	IGKV14-100*01	IGKV9-120*01	IGKV14-100*01	IGKV17-121*01	IGKV14-100*01	IGKV17-121*01	IGKV17-121*01	IGKV14-100*01	IGKV4-70*01	IGKV9-124*01	IGKV9-124*01	IGKV17-121*01
	IGKV9-120*01	IGKV14-100*01	IGKV9-120*01	IGKV14-100*01	IGKV9-120*01	IGKV8-30*01	IGKV14-111*01 F	IGKV9-120*01 F	IGKV14-100*01	IGKV9-120*01	IGKV9-120*01	IGKV17-121*01	IGKV14-100*01	IGKV17-121*01	IGKV17-121*01	IGKV14-100*01	IGKV4-70*01	IGKV9-124*01	IGKV9-124*01	IGKV17-121*01
	IGKV9-120*01	IGKV14-100*01	IGKV9-120*01	IGKV14-100*01	IGKV9-120*01	IGKV8-30*01	IGKV14-111*01 F	IGKV1-135*01 F	IGKV14-100*01	IGKV9-120*01	IGKV9-120*01	IGKV17-121*01	IGKV14-100*01	IGKV17-121*01	IGKV17-121*01	IGKV14-100*01	IGKV4-70*01	IGKV9-124*01	IGKV9-124*01	IGKV17-121*01
	IGKV9-120*01	IGKV14-100*01	IGKV9-120*01	IGKV14-100*01	IGKV9-120*01	IGKV8-30*01	IGKV14-111*01 F	IGKV9-120*01 F	IGKV14-100*01	IGKV9-120*01	IGKV9-120*01	IGKV17-121*01	IGKV14-100*01	IGKV17-121*01	IGKV17-121*01	IGKV14-100*01	IGKV4-70*01	IGKV9-124*01	IGKV9-124*01	IGKV17-121*01
	IGKV9-120*01	IGKV14-100*01	IGKV9-120*01	IGKV14-100*01	IGKV9-120*01	IGKV8-30*01	IGKV14-111*01 F	IGKV14-111*01 F	IGKV14-100*01	IGKV9-120*01	IGKV14-100*01	IGKV17-121*01	IGKV14-100*01	IGKV17-121*01	IGKV4-91*01	IGKV14-100*01	IGKV4-70*01	IGKV9-124*01	IGKV9-124*01	IGKV17-121*01
	IGKV9-120*01	IGKV14-100*01	IGKV9-120*01	IGKV14-100*01	IGKV9-120*01	IGKV8-30*01	IGKV14-111*01 F	IGKV9-120*01 F	IGKV14-100*01	IGKV9-120*01	IGKV9-120*01	IGKV17-121*01	IGKV14-100*01	IGKV17-121*01	IGKV17-121*01	IGKV14-100*01	IGKV4-70*01	IGKV9-124*01	IGKV9-124*01	IGKV17-121*01
	IGKV9-120*01	IGKV14-100*01	IGKV9-120*01	IGKV14-100*01	IGKV9-120*01	IGKV9-120*01	IGKV14-111*01 F	IGKV9-120*01 F	IGKV14-100*01	IGKV9-120*01	IGKV9-120*01	IGKV17-121*01	IGKV14-100*01	IGKV17-121*01	IGKV17-121*01	IGKV14-100*01	IGKV4-70*01	IGKV9-124*01	IGKV9-124*01	IGKV17-121*01
	IGKV9-120*01	IGKV14-100*01	IGKV9-120*01	IGKV14-100*01	IGKV9-120*01	IGKV8-30*01	IGKV14-111*01 F	IGKV9-120*01 F	IGKV1-135*01	IGKV9-120*01	IGKV14-100*01	IGKV17-121*01	IGKV14-100*01	IGKV17-121*01	IGKV4-91*01	IGKV14-100*01	IGKV4-70*01	IGKV9-124*01	IGKV9-124*01	IGKV17-121*01
	IGKV9-120*01	IGKV14-100*01	IGKV9-120*01	IGKV14-100*01	IGKV9-120*01	IGKV8-30*01	IGKV14-111*01 F	IGKV9-120*01 F	IGKV14-100*01	IGKV9-120*01	IGKV9-120*01	IGKV17-121*01	IGKV9-120*01	IGKV17-121*01	IGKV4-91*01	IGKV14-100*01	IGKV4-70*01	IGKV9-124*01	IGKV9-124*01	IGKV17-121*01
	IGKV9-120*01	IGKV14-100*01	IGKV9-120*01	IGKV14-100*01	IGKV9-120*01	IGKV8-30*01	IGKV14-111*01 F	IGKV9-120*01 F	IGKV14-100*01	IGKV9-120*01	IGKV14-100*01	IGKV17-121*01	IGKV9-120*01	IGKV17-121*01	IGKV4-91*01	IGKV14-100*01	IGKV4-70*01	IGKV9-124*01	IGKV9-124*01	IGKV17-121*01
	IGKV9-120*01	IGKV14-100*01	IGKV9-120*01	IGKV14-100*01	IGKV9-120*01	IGKV9-120*01	IGKV14-111*01 F	IGKV9-120*01 F	IGKV14-100*01	IGKV9-120*01	IGKV14-100*01	IGKV17-121*01	IGKV9-124*01	IGKV17-121*01	IGKV17-121*01	IGKV14-100*01	IGKV4-70*01	IGKV9-124*01	IGKV9-124*01	IGKV17-121*01
	IGKV9-120*01	IGKV14-100*01	IGKV9-120*01	IGKV14-100*01	IGKV9-120*01	IGKV8-30*01	IGKV14-111*01 F	IGKV9-120*01 F	IGKV14-100*01	IGKV9-120*01	IGKV9-120*01	IGKV17-121*01	IGKV9-120*01	IGKV17-121*01	IGKV4-91*01	IGKV14-100*01	IGKV4-70*01	IGKV9-124*01	IGKV9-124*01	IGKV17-121*01
	IGKV9-120*01	IGKV14-100*01	IGKV9-120*01	IGKV14-100*01	IGKV9-120*01	IGKV8-30*01	IGKV14-111*01 F	IGKV14-111*01 F	IGKV14-100*01	IGKV9-120*01	IGKV14-100*01	IGKV17-121*01	IGKV14-100*01	IGKV17-121*01	IGKV4-91*01	IGKV14-100*01	IGKV4-70*01	IGKV4-53*01	IGKV9-124*01	IGKV17-121*01
	IGKV9-120*01	IGKV14-100*01	IGKV9-120*01	IGKV14-100*01	IGKV9-120*01	IGKV8-30*01	IGKV14-111*01 F	IGKV14-111*01 F	IGKV14-100*01	IGKV9-120*01	IGKV9-120*01	IGKV17-121*01	IGKV14-100*01	IGKV17-121*01	IGKV17-121*01	IGKV14-100*01	IGKV4-70*01	IGKV9-124*01	IGKV9-124*01	IGKV17-121*01
	IGKV9-120*01	IGKV14-100*01	IGKV9-120*01	IGKV14-100*01	IGKV9-120*01	IGKV9-120*01	IGKV14-111*01 F	IGKV14-111*01 F	IGKV14-100*01	IGKV9-120*01	IGKV14-100*01	IGKV17-121*01	IGKV14-100*01	IGKV17-121*01	IGKV17-121*01	IGKV14-100*01	IGKV4-70*01	IGKV9-124*01	IGKV9-124*01	IGKV17-121*01
	IGKV9-120*01	IGKV14-100*01	IGKV9-120*01	IGKV14-100*01	IGKV9-120*01	IGKV9-120*01	IGKV14-111*01 F	IGKV9-120*01 F	IGKV14-100*01	IGKV9-120*01	IGKV14-100*01	IGKV17-121*01	IGKV14-100*01	IGKV17-121*01	IGKV17-121*01	IGKV14-100*01	IGKV4-70*01	IGKV9-124*01	IGKV9-124*01	IGKV17-121*01
	IGKV9-120*01	IGKV14-100*01	IGKV9-120*01	IGKV14-100*01	IGKV9-120*01	IGKV8-30*01	IGKV14-111*01 F	IGKV14-111*01 F	IGKV14-100*01	IGKV9-120*01	IGKV14-100*01	IGKV17-121*01	IGKV9-120*01	IGKV17-121*01	IGKV17-121*01	IGKV14-100*01	IGKV4-70*01	IGKV9-124*01	IGKV9-124*01	IGKV17-121*01
	IGKV9-120*01	IGKV14-100*01	IGKV9-120*01	IGKV14-100*01	IGKV9-120*01	IGKV8-30*01	IGKV14-111*01 F	IGKV14-111*01 F	IGKV14-100*01	IGKV9-120*01	IGKV9-120*01	IGKV17-121*01	IGKV14-100*01	IGKV17-121*01	IGKV4-91*01	IGKV14-100*01	IGKV4-70*01	IGKV9-124*01	IGKV9-124*01	IGKV17-121*01
	IGKV9-120*01	IGKV14-100*01	IGKV9-120*01	IGKV14-100*01	IGKV9-120*01	IGKV8-30*01	IGKV14-111*01 F	IGKV14-111*01 F	IGKV14-100*01	IGKV9-120*01	IGKV14-100*01	IGKV17-121*01	IGKV14-100*01	IGKV17-121*01	IGKV17-121*01	IGKV14-100*01	IGKV4-70*01	IGKV9-124*01	IGKV9-124*01	IGKV17-121*01
	IGKV9-120*01	IGKV14-100*01	IGKV9-120*01	IGKV14-100*01	IGKV9-120*01	IGKV8-30*01	IGKV14-111*01 F	IGKV14-111*01 F	IGKV14-100*01	IGKV9-120*01	IGKV14-100*01	IGKV17-121*01	IGKV9-120*01	IGKV17-121*01	IGKV17-121*01	IGKV14-100*01	IGKV4-70*01	IGKV9-124*01	IGKV9-124*01	IGKV17-121*01
	IGKV9-120*01	IGKV14-100*01	IGKV9-120*01	IGKV14-100*01	IGKV9-120*01	IGKV9-120*01	IGKV14-111*01 F	IGKV9-120*01 F	IGKV14-100*01	IGKV9-120*01	IGKV14-100*01	IGKV17-121*01	IGKV14-100*01	IGKV17-121*01	IGKV4-91*01	IGKV14-100*01	IGKV4-70*01	IGKV9-124*01	IGKV9-124*01	IGKV17-121*01
	IGKV9-120*01	IGKV14-100*01	IGKV9-120*01	IGKV14-100*01	IGKV9-120*01	IGKV8-30*01	IGKV14-111*01 F	IGKV9-120*01 F	IGKV14-100*01	IGKV9-120*01	IGKV14-100*01	IGKV17-121*01	IGKV14-100*01	IGKV17-121*01	IGKV4-91*01	IGKV14-100*01	IGKV4-70*01	IGKV9-124*01	IGKV9-124*01	IGKV17-121*01
	IGKV9-120*01	IGKV14-100*01	IGKV9-120*01	IGKV14-100*01	IGKV9-120*01	IGKV8-30*01	IGKV14-111*01 F	IGKV9-120*01 F	IGKV14-100*01	IGKV9-120*01	IGKV14-100*01	IGKV17-121*01	IGKV9-120*01	IGKV17-121*01	IGKV17-121*01	IGKV14-100*01	IGKV4-70*01	IGKV9-124*01	IGKV9-124*01	IGKV17-121*01
	IGKV9-120*01	IGKV14-100*01	IGKV9-120*01	IGKV14-100*01	IGKV9-120*01	IGKV8-30*01	IGKV14-111*01 F	IGKV9-120*01 F	IGKV17-121*01	IGKV9-120*01	IGKV14-100*01	IGKV17-121*01	IGKV9-124*01	IGKV17-121*01	IGKV4-91*01	IGKV14-100*01	IGKV4-70*01	IGKV9-124*01	IGKV9-124*01	IGKV17-121*01
	IGKV9-120*01	IGKV14-100*01	IGKV9-120*01	IGKV14-100*01	IGKV9-120*01	IGKV8-30*01	IGKV14-111*01 F	IGKV9-120*01 F	IGKV14-100*01	IGKV9-120*01	IGKV14-100*01	IGKV17-121*01	IGKV9-120*01	IGKV17-121*01	IGKV4-91*01	IGKV14-100*01	IGKV4-70*01	IGKV9-124*01	IGKV9-124*01	IGKV17-121*01
	IGKV9-120*01	IGKV14-100*01	IGKV9-120*01	IGKV14-100*01	IGKV9-120*01	IGKV8-30*01	IGKV14-111*01 F	IGKV9-120*01 F	IGKV14-100*01	IGKV9-120*01	IGKV14-100*01	IGKV17-121*01	IGKV9-120*01	IGKV17-121*01	IGKV4-91*01	IGKV14-100*01	IGKV4-70*01	IGKV9-124*01	IGKV9-124*01	IGKV17-121*01
	IGKV9-120*01	IGKV14-100*01	IGKV9-120*01	IGKV14-100*01	IGKV9-120*01	IGKV8-30*01	IGKV14-111*01 F	IGKV9-120*01 F	IGKV14-100*01	IGKV9-120*01	IGKV14-100*01	IGKV17-121*01	IGKV14-100*01	IGKV17-121*01	IGKV4-91*01	IGKV14-100*01	IGKV4-70*01	IGKV9-124*01	IGKV9-124*01	IGKV17-121*01
	IGKV9-120*01	IGKV14-100*01	IGKV9-120*01	IGKV14-100*01	IGKV9-120*01	IGKV8-30*01	IGKV14-111*01 F	IGKV9-120*01 F	IGKV14-100*01	IGKV9-120*01	IGKV14-100*01	IGKV17-121*01	IGKV14-100*01	IGKV17-121*01	IGKV4-91*01	IGKV14-100*01	IGKV4-70*01	IGKV9-124*01	IGKV9-124*01	IGKV17-121*01
	IGKV9-120*01	IGKV14-100*01	IGKV9-120*01	IGKV14-100*01	IGKV9-120*01	IGKV8-30*01	IGKV14-111*01 F	IGKV9-120*01 F	IGKV14-100*01	IGKV9-120*01	IGKV9-120*01	IGKV17-121*01	IGKV14-100*01	IGKV17-121*01	IGKV4-91*01	IGKV14-100*01	IGKV4-70*01	IGKV9-124*01	IGKV9-124*01	IGKV17-121*01
	IGKV9-120*01	IGKV14-100*01	IGKV9-120*01	IGKV14-100*01	IGKV9-120*01	IGKV8-30*01	IGKV14-111*01 F	IGKV3-5*01 F	IGKV14-100*01	IGKV9-120*01	IGKV14-100*01	IGKV17-121*01	IGKV14-100*01	IGKV17-121*01	IGKV4-91*01	IGKV14-100*01	IGKV4-70*01	IGKV9-124*01	IGKV9-124*01	IGKV17-121*01
	IGKV9-120*01	IGKV14-100*01	IGKV9-120*01	IGKV14-100*01	IGKV9-120*01	IGKV8-30*01	IGKV14-111*01 F	IGKV9-120*01 F	IGKV14-100*01	IGKV9-120*01	IGKV14-100*01	IGKV17-121*01	IGKV14-100*01	IGKV17-121*01	IGKV17-121*01	IGKV14-100*01	IGKV4-70*01	IGKV9-124*01	IGKV9-124*01	IGKV17-121*01
	IGKV9-120*01	IGKV14-100*01	IGKV9-120*01	IGKV14-100*01	IGKV9-120*01	IGKV8-30*01	IGKV14-111*01 F	IGKV9-120*01 F	IGKV14-100*01	IGKV9-120*01	IGKV14-100*01	IGKV17-121*01	IGKV14-100*01	IGKV17-121*01	IGKV4-91*01	IGKV14-100*01	IGKV4-70*01	IGKV9-124*01	IGKV9-124*01	IGKV17-121*01
	IGKV9-120*01	IGKV14-100*01	IGKV9-120*01	IGKV14-100*01	IGKV9-120*01	IGKV8-30*01	IGKV14-111*01 F	IGKV14-111*01 F	IGKV14-100*01	IGKV9-120*01	IGKV14-100*01	IGKV17-121*01	IGKV9-120*01	IGKV17-121*01	IGKV17-121*01	IGKV14-100*01	IGKV4-70*01	IGKV9-124*01	IGKV9-124*01	IGKV17-121*01
	IGKV9-120*01	IGKV14-100*01	IGKV9-120*01	IGKV14-100*01	IGKV9-120*01	IGKV8-30*01	IGKV14-111*01 F	IGKV9-120*01 F	IGKV14-100*01	IGKV9-120*01	IGKV14-100*01	IGKV17-121*01	IGKV14-100*01	IGKV17-121*01	IGKV17-121*01	IGKV14-100*01	IGKV4-70*01	IGKV9-124*01	IGKV9-124*01	IGKV17-121*01
	IGKV9-120*01	IGKV14-100*01	IGKV9-120*01	IGKV14-100*01	IGKV9-120*01	IGKV8-30*01	IGKV14-111*01 F	IGKV14-111*01 F	IGKV14-100*01	IGKV9-120*01	IGKV14-100*01	IGKV17-121*01	IGKV9-120*01	IGKV17-121*01	IGKV4-91*01	IGKV14-100*01	IGKV4-70*01	IGKV9-124*01	IGKV9-124*01	IGKV17-121*01
	IGKV9-120*01	IGKV14-100*01	IGKV9-120*01	IGKV14-100*01	IGKV9-120*01	IGKV9-120*01	IGKV14-111*01 F	IGKV14-111*01 F	IGKV14-100*01	IGKV9-120*01	IGKV9-120*01	IGKV17-121*01	IGKV14-100*01	IGKV17-121*01	IGKV4-91*01	IGKV14-100*01	IGKV4-70*01	IGKV9-124*01	IGKV9-124*01	IGKV17-121*01
	IGKV9-120*01	IGKV14-100*01	IGKV9-120*01	IGKV14-100*01	IGKV9-120*01	IGKV8-30*01	IGKV14-111*01 F	IGKV9-120*01 F	IGKV14-100*01	IGKV9-120*01	IGKV14-100*01	IGKV17-121*01	IGKV14-100*01	IGKV17-121*01	IGKV4-91*01	IGKV14-100*01	IGKV4-70*01	IGKV9-124*01	IGKV9-124*01	IGKV17-121*01
	IGKV9-120*01	IGKV14-100*01	IGKV9-120*01	IGKV14-100*01	IGKV9-120*01	IGKV8-30*01	IGKV14-111*01 F	IGKV9-120*01 F	IGKV8-28*01	IGKV9-120*01	IGKV9-120*01	IGKV17-121*01	IGKV14-100*01	IGKV17-121*01	IGKV4-91*01	IGKV14-100*01	IGKV4-70*01	IGKV9-124*01	IGKV9-124*01	IGKV17-121*01
	IGKV9-120*01	IGKV14-100*01	IGKV9-120*01	IGKV14-100*01	IGKV9-120*01	IGKV8-30*01	IGKV14-111*01 F	IGKV9-120*01 F	IGKV14-100*01	IGKV9-120*01	IGKV9-120*01	IGKV17-121*01	IGKV14-100*01	IGKV17-121*01	IGKV4-91*01	IGKV14-100*01	IGKV4-70*01	IGKV9-124*01	IGKV9-124*01	IGKV17-121*01
	IGKV9-120*01	IGKV14-100*01	IGKV9-120*01	IGKV14-100*01	IGKV9-120*01	IGKV8-30*01	IGKV14-111*01 F	IGKV9-120*01 F	IGKV14-100*01	IGKV9-120*01	IGKV9-120*01	IGKV17-121*01	IGKV14-100*01	IGKV17-121*01	IGKV4-91*01	IGKV14-100*01	IGKV4-70*01	IGKV9-124*01	IGKV9-124*01	IGKV17-121*01
	IGKV9-120*01	IGKV14-100*01	IGKV9-120*01	IGKV14-100*01	IGKV9-120*01	IGKV8-30*01	IGKV14-111*01 F	IGKV9-120*01 F	IGKV14-100*01	IGKV9-120*01	IGKV9-120*01	IGKV17-121*01	IGKV14-100*01	IGKV17-121*01	IGKV17-121*01	IGKV14-100*01	IGKV4-70*01	IGKV9-124*01	IGKV9-124*01	IGKV17-121*01
	IGKV9-120*01	IGKV14-100*01	IGKV9-120*01	IGKV14-100*01	IGKV9-120*01	IGKV9-120*01	IGKV14-111*01 F	IGKV9-120*01 F	IGKV14-100*01	IGKV9-120*01	IGKV9-120*01	IGKV17-121*01	IGKV14-100*01	IGKV17-121*01	IGKV4-91*01	IGKV14-100*01	IGKV4-70*01	IGKV9-124*01	IGKV9-124*01	IGKV17-121*01
	IGKV9-120*01	IGKV14-100*01	IGKV9-120*01	IGKV14-100*01	IGKV9-120*01	IGKV8-30*01	IGKV14-111*01 F	IGKV9-120*01 F	IGKV14-100*01	IGKV9-120*01	IGKV14-100*01	IGKV17-121*01	IGKV14-100*01	IGKV17-121*01	IGKV17-121*01	IGKV14-100*01	IGKV4-70*01	IGKV9-124*01	IGKV9-124*01	IGKV17-121*01
	IGKV9-120*01	IGKV14-100*01	IGKV9-120*01	IGKV14-100*01	IGKV9-120*01	IGKV9-120*01	IGKV14-111*01 F	IGKV9-120*01 F	IGKV14-100*01	IGKV9-120*01	IGKV9-120*01	IGKV17-121*01	IGKV9-120*01	IGKV17-121*01	IGKV17-121*01	IGKV14-100*01	IGKV4-70*01	IGKV9-124*01	IGKV9-124*01	IGKV4-68*01
	IGKV9-120*01	IGKV14-100*01	IGKV9-120*01	IGKV14-100*01	IGKV9-120*01	IGKV8-30*01	IGKV14-111*01 F	IGKV9-120*01 F	IGKV14-100*01	IGKV9-120*01	IGKV9-120*01	IGKV17-121*01	IGKV14-100*01	IGKV17-121*01	IGKV17-121*01	IGKV14-100*01	IGKV4-70*01	IGKV9-124*01	IGKV9-124*01	IGKV17-121*01
	IGKV9-120*01	IGKV14-100*01	IGKV9-120*01	IGKV14-100*01	IGKV9-120*01	IGKV8-30*01	IGKV14-111*01 F	IGKV9-120*01 F	IGKV14-100*01	IGKV9-120*01	IGKV9-120*01	IGKV17-121*01	IGKV14-100*01	IGKV17-121*01	IGKV4-91*01	IGKV14-100*01	IGKV4-70*01	IGKV9-124*01	IGKV9-124*01	IGKV17-121*01
	IGKV9-120*01	IGKV14-100*01	IGKV9-120*01	IGKV14-100*01	IGKV9-120*01	IGKV8-30*01	IGKV14-111*01 F	IGKV14-111*01 F	IGKV14-100*01	IGKV9-120*01	IGKV14-100*01	IGKV17-121*01	IGKV9-120*01	IGKV17-121*01	IGKV4-91*01	IGKV14-100*01	IGKV4-70*01	IGKV9-124*01	IGKV9-124*01	IGKV17-121*01
	IGKV9-120*01	IGKV14-100*01	IGKV9-120*01	IGKV14-100*01	IGKV9-120*01	IGKV8-30*01	IGKV14-111*01 F	IGKV9-120*01 F	IGKV14-100*01	IGKV9-120*01	IGKV14-100*01	IGKV17-121*01	IGKV14-100*01	IGKV17-121*01	IGKV17-121*01	IGKV14-100*01	IGKV4-70*01	IGKV9-124*01	IGKV9-124*01	IGKV17-121*01
	IGKV9-120*01	IGKV14-100*01	IGKV9-120*01	IGKV14-100*01	IGKV9-120*01	IGKV8-30*01	IGKV14-111*01 F	IGKV9-120*01 F	IGKV14-100*01	IGKV9-120*01	IGKV14-100*01	IGKV17-121*01	IGKV14-100*01	IGKV17-121*01	IGKV17-121*01	IGKV14-100*01	IGKV4-70*01	IGKV9-124*01	IGKV9-124*01	IGKV17-121*01
	IGKV9-120*01	IGKV14-100*01	IGKV9-120*01	IGKV14-100*01	IGKV9-120*01	IGKV8-30*01	IGKV14-111*01 F	IGKV9-120*01 F	IGKV14-100*01	IGKV9-120*01	IGKV14-100*01	IGKV17-121*01	IGKV14-100*01	IGKV17-121*01	IGKV4-91*01	IGKV14-100*01	IGKV4-70*01	IGKV9-124*01	IGKV9-124*01	IGKV17-121*01
	IGKV9-120*01	IGKV14-100*01	IGKV9-120*01	IGKV14-100*01	IGKV9-120*01	IGKV8-30*01	IGKV14-111*01 F	IGKV9-120*01 F	IGKV14-100*01	IGKV9-120*01	IGKV9-120*01	IGKV17-121*01	IGKV14-100*01	IGKV17-121*01	IGKV4-91*01	IGKV14-100*01	IGKV4-70*01	IGKV9-124*01	IGKV9-124*01	IGKV17-121*01
	IGKV9-120*01	IGKV14-100*01	IGKV9-120*01	IGKV14-100*01	IGKV9-120*01	IGKV8-30*01	IGKV14-111*01 F	IGKV14-111*01 F	IGKV14-100*01	IGKV9-120*01	IGKV14-100*01	IGKV17-121*01	IGKV14-100*01	IGKV17-121*01	IGKV4-91*01	IGKV14-100*01	IGKV4-70*01	IGKV9-124*01	IGKV9-124*01	IGKV4-68*01
	IGKV9-120*01	IGKV14-100*01	IGKV9-120*01	IGKV14-100*01	IGKV9-120*01	IGKV8-30*01	IGKV14-111*01 F	IGKV9-120*01 F	IGKV14-100*01	IGKV9-120*01	IGKV9-120*01	IGKV17-121*01	IGKV9-120*01	IGKV17-121*01	IGKV17-121*01	IGKV14-100*01	IGKV4-70*01	IGKV9-124*01	IGKV9-124*01	IGKV17-121*01
	IGKV9-120*01	IGKV14-100*01	IGKV9-120*01	IGKV14-100*01	IGKV9-120*01	IGKV8-30*01	IGKV14-111*01 F	IGKV9-120*01 F	IGKV14-100*01	IGKV9-120*01	IGKV14-100*01	IGKV17-121*01	IGKV9-120*01	IGKV17-121*01	IGKV17-121*01	IGKV14-100*01	IGKV4-70*01	IGKV9-124*01	IGKV9-124*01	IGKV17-121*01
	IGKV9-120*01	IGKV14-100*01	IGKV9-120*01	IGKV14-100*01	IGKV9-120*01	IGKV8-30*01	IGKV14-111*01 F	IGKV9-120*01 F	IGKV14-100*01	IGKV9-120*01	IGKV14-100*01	IGKV17-121*01	IGKV14-100*01	IGKV17-121*01	IGKV4-91*01	IGKV14-100*01	IGKV4-70*01	IGKV9-124*01	IGKV9-124*01	IGKV17-121*01
	IGKV9-120*01	IGKV14-100*01	IGKV9-120*01	IGKV14-100*01	IGKV9-120*01	IGKV9-120*01	IGKV14-111*01 F	IGKV9-120*01 F	IGKV14-100*01	IGKV9-120*01	IGKV14-100*01	IGKV17-121*01	IGKV9-120*01	IGKV17-121*01	IGKV4-91*01	IGKV14-100*01	IGKV4-70*01	IGKV9-124*01	IGKV9-124*01	IGKV17-121*01
	IGKV9-120*01	IGKV14-100*01	IGKV9-120*01	IGKV14-100*01	IGKV9-120*01	IGKV8-30*01	IGKV14-111*01 F	IGKV9-120*01 F	IGKV14-100*01	IGKV9-120*01	IGKV14-100*01	IGKV17-121*01	IGKV14-100*01	IGKV17-121*01	IGKV17-121*01	IGKV14-100*01	IGKV4-70*01	IGKV9-124*01	IGKV9-124*01	IGKV17-121*01
	IGKV9-120*01	IGKV14-100*01	IGKV9-120*01	IGKV14-100*01	IGKV9-120*01	IGKV9-120*01	IGKV14-111*01 F	IGKV9-120*01 F	IGKV14-100*01	IGKV9-120*01	IGKV14-100*01	IGKV17-121*01	IGKV14-100*01	IGKV17-121*01	IGKV17-121*01	IGKV14-100*01	IGKV4-70*01	IGKV9-124*01	IGKV9-124*01	IGKV17-121*01
	IGKV9-120*01	IGKV14-100*01	IGKV9-120*01	IGKV14-100*01	IGKV9-120*01	IGKV8-30*01	IGKV14-111*01 F	IGKV9-120*01 F	IGKV14-100*01	IGKV9-120*01	IGKV9-120*01	IGKV17-121*01	IGKV14-100*01	IGKV17-121*01	IGKV4-91*01	IGKV14-100*01	IGKV4-70*01	IGKV9-124*01	IGKV9-124*01	IGKV17-121*01
	IGKV9-120*01	IGKV14-100*01	IGKV9-120*01	IGKV14-100*01	IGKV9-120*01	IGKV8-30*01	IGKV14-111*01 F	IGKV9-120*01 F	IGKV14-100*01	IGKV9-120*01	IGKV14-100*01	IGKV17-121*01	IGKV14-100*01	IGKV17-121*01	IGKV4-91*01	IGKV14-100*01	IGKV4-70*01	IGKV9-124*01	IGKV9-124*01	IGKV17-121*01
	IGKV9-120*01	IGKV14-100*01	IGKV9-120*01	IGKV14-100*01	IGKV9-120*01	IGKV8-30*01	IGKV14-111*01 F	IGKV9-120*01 F	IGKV14-100*01	IGKV9-120*01	IGKV9-120*01	IGKV17-121*01	IGKV14-100*01	IGKV17-121*01	IGKV4-91*01	IGKV14-100*01	IGKV4-70*01	IGKV9-124*01	IGKV9-124*01	IGKV17-121*01
	IGKV9-120*01	IGKV14-100*01	IGKV9-120*01	IGKV14-100*01	IGKV9-120*01	IGKV8-30*01	IGKV14-111*01 F	IGKV9-120*01 F	IGKV1-135*01	IGKV9-120*01	IGKV9-120*01	IGKV17-121*01	IGKV9-120*01	IGKV17-121*01	IGKV4-91*01	IGKV14-100*01	IGKV4-70*01	IGKV9-124*01	IGKV9-124*01	IGKV17-121*01
	IGKV9-120*01	IGKV14-100*01	IGKV9-120*01	IGKV14-100*01	IGKV9-120*01	IGKV8-30*01	IGKV14-111*01 F	IGKV9-120*01 F	IGKV14-100*01	IGKV9-120*01	IGKV9-120*01	IGKV17-121*01	IGKV14-100*01	IGKV17-121*01	IGKV4-91*01	IGKV14-100*01	IGKV4-70*01	IGKV9-124*01	IGKV9-124*01	IGKV17-121*01
	IGKV9-120*01	IGKV14-100*01	IGKV9-120*01	IGKV14-100*01	IGKV9-120*01	IGKV8-30*01	IGKV14-111*01 F	IGKV9-120*01 F	IGKV14-100*01	IGKV9-120*01	IGKV9-120*01	IGKV17-121*01	IGKV9-120*01	IGKV17-121*01	IGKV17-121*01	IGKV14-100*01	IGKV4-70*01	IGKV9-124*01	IGKV9-124*01	IGKV17-121*01
	IGKV9-120*01	IGKV14-100*01	IGKV9-120*01	IGKV14-100*01	IGKV9-120*01	IGKV8-30*01	IGKV14-111*01 F	IGKV1-135*01 F	IGKV14-100*01	IGKV9-120*01	IGKV9-120*01	IGKV17-121*01	IGKV14-100*01	IGKV17-121*01	IGKV17-121*01	IGKV14-100*01	IGKV4-70*01	IGKV9-124*01	IGKV9-124*01	IGKV17-121*01
	IGKV9-120*01	IGKV14-100*01	IGKV9-120*01	IGKV14-100*01	IGKV9-120*01	IGKV8-30*01	IGKV14-111*01 F	IGKV9-120*01 F	IGKV17-121*01	IGKV9-120*01	IGKV14-100*01	IGKV17-121*01	IGKV9-120*01	IGKV17-121*01	IGKV4-91*01	IGKV14-100*01	IGKV4-70*01	IGKV9-124*01	IGKV9-124*01	IGKV17-121*01
	IGKV9-120*01	IGKV14-100*01	IGKV9-120*01	IGKV14-100*01	IGKV9-120*01	IGKV8-30*01	IGKV14-111*01 F	IGKV9-120*01 F	IGKV14-100*01	IGKV9-120*01	IGKV9-120*01	IGKV17-121*01	IGKV9-120*01	IGKV17-121*01	IGKV17-121*01	IGKV14-100*01	IGKV4-70*01	IGKV9-124*01	IGKV9-124*01	IGKV17-121*01
	IGKV9-120*01	IGKV14-100*01	IGKV9-120*01	IGKV14-100*01	IGKV9-120*01	IGKV8-30*01	IGKV14-111*01 F	IGKV9-120*01 F	IGKV14-100*01	IGKV9-120*01	IGKV14-100*01	IGKV17-121*01	IGKV14-100*01	IGKV17-121*01	IGKV17-121*01	IGKV14-100*01	IGKV4-70*01	IGKV9-124*01	IGKV9-124*01	IGKV17-121*01
	IGKV9-120*01	IGKV14-100*01	IGKV9-120*01	IGKV14-100*01	IGKV9-120*01	IGKV8-30*01	IGKV14-111*01 F	IGKV14-111*01 F	IGKV14-100*01	IGKV9-120*01	IGKV14-100*01	IGKV17-121*01	IGKV14-100*01	IGKV17-121*01	IGKV17-121*01	IGKV14-100*01	IGKV4-70*01	IGKV9-124*01	IGKV9-124*01	IGKV17-121*01
	IGKV9-120*01	IGKV14-100*01	IGKV9-120*01	IGKV14-100*01	IGKV9-120*01	IGKV8-30*01	IGKV14-111*01 F	IGKV9-120*01 F	IGKV14-100*01	IGKV9-120*01	IGKV9-120*01	IGKV17-121*01	IGKV9-120*01	IGKV17-121*01	IGKV17-121*01	IGKV14-100*01	IGKV4-70*01	IGKV9-124*01	IGKV9-124*01	IGKV17-121*01
	IGKV9-120*01	IGKV14-100*01	IGKV9-120*01	IGKV14-100*01	IGKV9-120*01	IGKV8-30*01	IGKV14-111*01 F	IGKV14-111*01 F	IGKV14-100*01	IGKV9-120*01	IGKV14-100*01	IGKV17-121*01	IGKV14-100*01	IGKV17-121*01	IGKV17-121*01	IGKV14-100*01	IGKV4-70*01	IGKV9-124*01	IGKV9-124*01	IGKV17-121*01
	IGKV9-120*01	IGKV14-100*01	IGKV9-120*01	IGKV14-100*01	IGKV9-120*01	IGKV8-30*01	IGKV14-111*01 F	IGKV9-120*01 F	IGKV14-100*01	IGKV4-70*01	IGKV9-120*01	IGKV17-121*01	IGKV14-100*01	IGKV17-121*01	IGKV4-91*01	IGKV14-100*01	IGKV4-70*01	IGKV9-124*01	IGKV9-124*01	IGKV17-121*01
	IGKV9-120*01	IGKV14-100*01	IGKV9-120*01	IGKV14-100*01	IGKV9-120*01	IGKV8-30*01	IGKV14-111*01 F	IGKV1-135*01 F	IGKV14-100*01	IGKV9-120*01	IGKV14-100*01	IGKV17-121*01	IGKV14-100*01	IGKV17-121*01	IGKV4-91*01	IGKV14-100*01	IGKV4-70*01	IGKV9-124*01	IGKV9-124*01	IGKV17-121*01
	IGKV9-120*01	IGKV14-100*01	IGKV9-120*01	IGKV14-100*01	IGKV9-120*01	IGKV8-30*01	IGKV14-111*01 F	IGKV9-120*01 F	IGKV14-100*01	IGKV9-120*01	IGKV14-100*01	IGKV17-121*01	IGKV9-120*01	IGKV17-121*01	IGKV17-121*01	IGKV14-100*01	IGKV4-70*01	IGKV9-124*01	IGKV9-124*01	IGKV17-121*01
	IGKV9-120*01	IGKV14-100*01	IGKV9-120*01	IGKV14-100*01	IGKV9-120*01	IGKV8-30*01	IGKV14-111*01 F	IGKV9-120*01 F	IGKV14-100*01	IGKV9-120*01	IGKV14-100*01	IGKV17-121*01	IGKV14-100*01	IGKV17-121*01	IGKV4-91*01	IGKV14-100*01	IGKV4-70*01	IGKV9-124*01	IGKV9-124*01	IGKV17-121*01
	IGKV9-120*01	IGKV14-100*01	IGKV9-120*01	IGKV14-100*01	IGKV9-120*01	IGKV8-30*01	IGKV14-111*01 F	IGKV9-120*01 F	IGKV14-100*01	IGKV9-120*01	IGKV9-120*01	IGKV17-121*01	IGKV9-120*01	IGKV17-121*01	IGKV17-121*01	IGKV14-100*01	IGKV4-70*01	IGKV9-124*01	IGKV9-124*01	IGKV17-121*01
	IGKV9-120*01	IGKV14-100*01	IGKV9-120*01	IGKV14-100*01	IGKV9-120*01	IGKV8-30*01	IGKV14-111*01 F	IGKV9-120*01 F	IGKV14-100*01	IGKV9-120*01	IGKV14-100*01	IGKV17-121*01	IGKV14-100*01	IGKV17-121*01	IGKV4-91*01	IGKV14-100*01	IGKV4-70*01	IGKV9-124*01	IGKV9-124*01	IGKV17-121*01
	IGKV9-120*01	IGKV14-100*01	IGKV9-120*01	IGKV14-100*01	IGKV9-120*01	IGKV8-30*01	IGKV14-111*01 F	IGKV14-111*01 F	IGKV14-100*01	IGKV9-120*01	IGKV9-120*01	IGKV17-121*01	IGKV14-100*01	IGKV17-121*01	IGKV17-121*01	IGKV14-100*01	IGKV4-70*01	IGKV9-124*01	IGKV9-124*01	IGKV17-121*01
	IGKV9-120*01	IGKV14-100*01	IGKV9-120*01	IGKV14-100*01	IGKV9-120*01	IGKV8-30*01	IGKV14-111*01 F	IGKV14-111*01 F	IGKV14-100*01	IGKV9-120*01	IGKV14-100*01	IGKV17-121*01	IGKV9-120*01	IGKV17-121*01	IGKV4-91*01	IGKV14-100*01	IGKV4-70*01	IGKV9-124*01	IGKV9-124*01	IGKV17-121*01
	IGKV9-120*01	IGKV14-100*01	IGKV9-120*01	IGKV14-100*01	IGKV9-120*01	IGKV8-30*01	IGKV14-111*01 F	IGKV9-120*01 F	IGKV14-100*01	IGKV9-120*01	IGKV9-120*01	IGKV17-121*01	IGKV14-100*01	IGKV17-121*01	IGKV4-91*01	IGKV14-100*01	IGKV4-70*01	IGKV9-124*01	IGKV9-124*01	IGKV4-68*01
	IGKV9-120*01	IGKV14-100*01	IGKV9-120*01	IGKV14-100*01	IGKV9-120*01	IGKV8-30*01	IGKV14-111*01 F	IGKV9-120*01 F	IGKV14-100*01	IGKV9-120*01	IGKV14-100*01	IGKV17-121*01	IGKV14-100*01	IGKV17-121*01	IGKV4-91*01	IGKV14-100*01	IGKV4-70*01	IGKV9-124*01	IGKV9-124*01	IGKV17-121*01
	IGKV9-120*01	IGKV14-100*01	IGKV9-120*01	IGKV14-100*01	IGKV9-120*01	IGKV8-30*01	IGKV14-111*01 F	IGKV9-120*01 F	IGKV14-100*01	IGKV9-120*01	IGKV14-100*01	IGKV17-121*01	IGKV14-100*01	IGKV17-121*01	IGKV4-91*01	IGKV14-100*01	IGKV4-70*01	IGKV9-124*01	IGKV9-124*01	IGKV17-121*01
	IGKV9-120*01	IGKV14-100*01	IGKV9-120*01	IGKV14-100*01	IGKV9-120*01	IGKV8-30*01	IGKV14-111*01 F	IGKV9-120*01 F	IGKV14-100*01	IGKV9-120*01	IGKV14-100*01	IGKV17-121*01	IGKV14-100*01	IGKV17-121*01	IGKV17-121*01	IGKV14-100*01	IGKV4-70*01	IGKV9-124*01	IGKV9-124*01	IGKV17-121*01
	IGKV9-120*01	IGKV14-100*01	IGKV9-120*01	IGKV14-100*01	IGKV9-120*01	IGKV9-120*01	IGKV14-111*01 F	IGKV9-120*01 F	IGKV14-100*01	IGKV9-120*01	IGKV9-120*01	IGKV17-121*01	IGKV14-100*01	IGKV17-121*01	IGKV4-91*01	IGKV14-100*01	IGKV4-70*01	IGKV9-124*01	IGKV9-124*01	IGKV17-121*01
	IGKV9-120*01	IGKV14-100*01	IGKV9-120*01	IGKV14-100*01	IGKV9-120*01	IGKV8-30*01	IGKV14-111*01 F	IGKV9-120*01 F	IGKV17-121*01	IGKV9-120*01	IGKV9-120*01	IGKV9-120*01	IGKV14-100*01	IGKV17-121*01	IGKV4-91*01	IGKV14-100*01	IGKV4-70*01	IGKV9-124*01	IGKV9-124*01	IGKV17-121*01
	IGKV9-120*01	IGKV14-100*01	IGKV9-120*01	IGKV14-100*01	IGKV9-120*01	IGKV8-30*01	IGKV14-111*01 F	IGKV9-120*01 F	IGKV14-100*01	IGKV9-120*01	IGKV14-100*01	IGKV17-121*01	IGKV14-100*01	IGKV17-121*01	IGKV17-121*01	IGKV14-100*01	IGKV4-70*01	IGKV9-124*01	IGKV9-124*01	IGKV17-121*01
	IGKV9-120*01	IGKV14-100*01	IGKV9-120*01	IGKV14-100*01	IGKV9-120*01	IGKV9-120*01	IGKV14-111*01 F	IGKV9-120*01 F	IGKV14-100*01	IGKV9-120*01	IGKV14-100*01	IGKV17-121*01	IGKV14-100*01	IGKV17-121*01	IGKV4-91*01	IGKV14-100*01	IGKV4-70*01	IGKV9-124*01	IGKV9-124*01	IGKV17-121*01
	IGKV9-120*01	IGKV14-100*01	IGKV9-120*01	IGKV14-100*01	IGKV9-120*01	IGKV8-30*01	IGKV14-111*01 F	IGKV9-120*01 F	IGKV14-100*01	IGKV9-120*01	IGKV14-100*01	IGKV17-121*01	IGKV9-120*01	IGKV17-121*01	IGKV17-121*01	IGKV14-100*01	IGKV4-70*01	IGKV9-124*01	IGKV9-124*01	IGKV17-121*01
	IGKV9-120*01	IGKV14-100*01	IGKV9-120*01	IGKV14-100*01	IGKV9-120*01	IGKV8-30*01	IGKV14-111*01 F	IGKV9-120*01 F	IGKV14-100*01	IGKV9-120*01	IGKV9-120*01	IGKV17-121*01	IGKV14-100*01	IGKV17-121*01	IGKV4-91*01	IGKV14-100*01	IGKV4-70*01	IGKV9-124*01	IGKV9-124*01	IGKV17-121*01
	IGKV9-120*01	IGKV14-100*01	IGKV9-120*01	IGKV14-100*01	IGKV9-120*01	IGKV8-30*01	IGKV14-111*01 F	IGKV9-120*01 F	IGKV14-100*01	IGKV9-120*01	IGKV14-100*01	IGKV17-121*01	IGKV9-120*01	IGKV17-121*01	IGKV17-121*01	IGKV14-100*01	IGKV4-70*01	IGKV9-124*01	IGKV9-124*01	IGKV17-121*01
	IGKV9-120*01	IGKV14-100*01	IGKV9-120*01	IGKV14-100*01	IGKV9-120*01	IGKV8-30*01	IGKV14-111*01 F	IGKV14-111*01 F	IGKV14-100*01	IGKV9-120*01	IGKV9-120*01	IGKV17-121*01	IGKV14-100*01	IGKV17-121*01	IGKV4-91*01	IGKV14-100*01	IGKV4-70*01	IGKV9-124*01	IGKV9-124*01	IGKV17-121*01
	IGKV9-120*01	IGKV14-100*01	IGKV9-120*01	IGKV14-100*01	IGKV9-120*01	IGKV8-30*01	IGKV14-111*01 F	IGKV9-120*01 F	IGKV14-100*01	IGKV9-120*01	IGKV9-120*01	IGKV17-121*01	IGKV14-100*01	IGKV17-121*01	IGKV17-121*01	IGKV14-100*01	IGKV4-70*01	IGKV9-124*01	IGKV9-124*01	IGKV17-121*01
	IGKV9-120*01	IGKV14-100*01	IGKV9-120*01	IGKV14-100*01	IGKV9-120*01	IGKV8-30*01	IGKV14-111*01 F	IGKV9-120*01 F	IGKV14-100*01	IGKV9-120*01	IGKV14-100*01	IGKV17-121*01	IGKV9-120*01	IGKV17-121*01	IGKV4-91*01	IGKV14-100*01	IGKV4-70*01	IGKV9-124*01	IGKV9-124*01	IGKV17-121*01
	IGKV9-120*01	IGKV14-100*01	IGKV9-120*01	IGKV14-100*01	IGKV9-120*01	IGKV8-30*01	IGKV14-111*01 F	IGKV14-111*01 F	IGKV14-100*01	IGKV9-120*01	IGKV9-120*01	IGKV17-121*01	IGKV14-100*01	IGKV17-121*01	IGKV17-121*01	IGKV14-100*01	IGKV4-70*01	IGKV9-124*01	IGKV9-124*01	IGKV17-121*01
	IGKV9-120*01	IGKV14-100*01	IGKV9-120*01	IGKV14-100*01	IGKV9-120*01	IGKV8-30*01	IGKV14-111*01 F	IGKV1-135*01 F	IGKV14-100*01	IGKV9-120*01	IGKV14-100*01	IGKV17-121*01	IGKV14-100*01	IGKV17-121*01	IGKV17-121*01	IGKV14-100*01	IGKV4-70*01	IGKV9-124*01	IGKV9-124*01	IGKV17-121*01
	IGKV9-120*01	IGKV14-100*01	IGKV9-120*01	IGKV14-100*01	IGKV9-120*01	IGKV8-30*01	IGKV14-111*01 F	IGKV9-120*01 F	IGKV14-100*01	IGKV9-120*01	IGKV9-120*01	IGKV17-121*01	IGKV14-100*01	IGKV17-121*01	IGKV4-91*01	IGKV14-100*01	IGKV4-70*01	IGKV9-124*01	IGKV9-124*01	IGKV4-68*01
	IGKV9-120*01	IGKV14-100*01	IGKV9-120*01	IGKV14-100*01	IGKV9-120*01	IGKV8-30*01	IGKV14-111*01 F	IGKV9-120*01 F	IGKV14-100*01	IGKV9-120*01	IGKV9-120*01	IGKV17-121*01	IGKV14-100*01	IGKV17-121*01	IGKV17-121*01	IGKV14-100*01	IGKV4-70*01	IGKV9-124*01	IGKV9-124*01	IGKV17-121*01
	IGKV9-120*01	IGKV14-100*01	IGKV9-120*01	IGKV14-100*01	IGKV9-120*01	IGKV9-120*01	IGKV14-111*01 F	IGKV9-120*01 F	IGKV14-100*01	IGKV9-120*01	IGKV9-120*01	IGKV17-121*01	IGKV14-100*01	IGKV17-121*01	IGKV4-91*01	IGKV14-100*01	IGKV4-70*01	IGKV9-124*01	IGKV9-124*01	IGKV17-121*01
	IGKV9-120*01	IGKV14-100*01	IGKV9-120*01	IGKV14-100*01	IGKV9-120*01	IGKV9-120*01	IGKV14-111*01 F	IGKV14-111*01 F	IGKV14-100*01	IGKV9-120*01	IGKV9-120*01	IGKV17-121*01	IGKV9-120*01	IGKV17-121*01	IGKV4-91*01	IGKV14-100*01	IGKV4-70*01	IGKV9-124*01	IGKV9-124*01	IGKV17-121*01
	IGKV9-120*01	IGKV14-100*01	IGKV9-120*01	IGKV14-100*01	IGKV9-120*01	IGKV8-30*01	IGKV14-111*01 F	IGKV9-120*01 F	IGKV14-100*01	IGKV9-120*01	IGKV9-120*01	IGKV17-121*01	IGKV14-100*01	IGKV17-121*01	IGKV17-121*01	IGKV14-100*01	IGKV4-70*01	IGKV9-124*01	IGKV9-124*01	IGKV17-121*01
	IGKV9-120*01	IGKV14-100*01	IGKV9-120*01	IGKV14-100*01	IGKV9-120*01	IGKV8-30*01	IGKV14-111*01 F	IGKV9-120*01 F	IGKV17-121*01	IGKV9-120*01	IGKV14-100*01	IGKV17-121*01	IGKV14-100*01	IGKV17-121*01	IGKV4-91*01	IGKV14-100*01	IGKV4-70*01	IGKV9-124*01	IGKV9-124*01	IGKV17-121*01
	IGKV9-120*01	IGKV14-100*01	IGKV9-120*01	IGKV14-100*01	IGKV9-120*01	IGKV9-120*01	IGKV14-111*01 F	IGKV9-120*01 F	IGKV14-100*01	IGKV9-120*01	IGKV9-120*01	IGKV17-121*01	IGKV14-100*01	IGKV17-121*01	IGKV4-91*01	IGKV14-100*01	IGKV4-70*01	IGKV9-124*01	IGKV9-124*01	IGKV17-121*01
	IGKV9-120*01	IGKV14-100*01	IGKV9-120*01	IGKV14-100*01	IGKV9-120*01	IGKV8-30*01	IGKV14-111*01 F	IGKV9-120*01 F	IGKV14-100*01	IGKV9-120*01	IGKV9-120*01	IGKV17-121*01	IGKV14-100*01	IGKV17-121*01	IGKV17-121*01	IGKV14-100*01	IGKV4-70*01	IGKV9-124*01	IGKV9-124*01	IGKV17-121*01
	IGKV9-120*01	IGKV14-100*01	IGKV9-120*01	IGKV14-100*01	IGKV9-120*01	IGKV8-30*01	IGKV14-111*01 F	IGKV9-120*01 F	IGKV1-135*01	IGKV9-120*01	IGKV9-120*01	IGKV17-121*01	IGKV14-100*01	IGKV17-121*01	IGKV4-91*01	IGKV14-100*01	IGKV4-70*01	IGKV9-124*01	IGKV9-124*01	IGKV17-121*01
	IGKV9-120*01	IGKV14-100*01	IGKV9-120*01	IGKV14-100*01	IGKV9-120*01	IGKV8-30*01	IGKV14-111*01 F	IGKV9-120*01 F	IGKV14-100*01	IGKV9-120*01	IGKV14-100*01	IGKV17-121*01	IGKV14-100*01	IGKV17-121*01	IGKV4-91*01	IGKV14-100*01	IGKV4-70*01	IGKV9-124*01	IGKV9-124*01	IGKV17-121*01
	IGKV9-120*01	IGKV14-100*01	IGKV9-120*01	IGKV14-100*01	IGKV9-120*01	IGKV8-30*01	IGKV14-111*01 F	IGKV9-120*01 F	IGKV14-100*01	IGKV9-120*01	IGKV9-120*01	IGKV17-121*01	IGKV14-100*01	IGKV17-121*01	IGKV17-121*01	IGKV14-100*01	IGKV4-70*01	IGKV9-124*01	IGKV9-124*01	IGKV17-121*01
	IGKV9-120*01	IGKV14-100*01	IGKV9-120*01	IGKV14-100*01	IGKV9-120*01	IGKV9-120*01	IGKV14-111*01 F	IGKV9-120*01 F	IGKV14-100*01	IGKV9-120*01	IGKV9-120*01	IGKV17-121*01	IGKV14-100*01	IGKV17-121*01	IGKV17-121*01	IGKV14-100*01	IGKV4-70*01	IGKV9-124*01	IGKV9-124*01	IGKV17-121*01
	IGKV9-120*01	IGKV14-100*01	IGKV9-120*01	IGKV14-100*01	IGKV9-120*01	IGKV8-30*01	IGKV14-111*01 F	IGKV9-120*01 F	IGKV14-100*01	IGKV9-120*01	IGKV14-100*01	IGKV17-121*01	IGKV14-100*01	IGKV17-121*01	IGKV4-91*01	IGKV14-100*01	IGKV4-70*01	IGKV9-124*01	IGKV9-124*01	IGKV17-121*01
	IGKV9-120*01	IGKV14-100*01	IGKV9-120*01	IGKV14-100*01	IGKV9-120*01	IGKV8-30*01	IGKV14-111*01 F	IGKV9-120*01 F	IGKV14-100*01	IGKV9-120*01	IGKV14-100*01	IGKV9-120*01	IGKV9-120*01	IGKV17-121*01	IGKV4-91*01	IGKV14-100*01	IGKV4-70*01	IGKV9-124*01	IGKV9-124*01	IGKV17-121*01
	IGKV9-120*01	IGKV14-100*01	IGKV9-120*01	IGKV14-100*01	IGKV9-120*01	IGKV8-30*01	IGKV14-111*01 F	IGKV14-111*01 F	IGKV14-100*01	IGKV9-120*01	IGKV14-100*01	IGKV17-121*01	IGKV14-100*01	IGKV17-121*01	IGKV17-121*01	IGKV14-100*01	IGKV4-70*01	IGKV9-124*01	IGKV9-124*01	IGKV17-121*01
	IGKV9-120*01	IGKV14-100*01	IGKV9-120*01	IGKV14-100*01	IGKV9-120*01	IGKV8-30*01	IGKV14-111*01 F	IGKV14-111*01 F	IGKV14-100*01	IGKV9-120*01	IGKV9-120*01	IGKV17-121*01	IGKV14-100*01	IGKV17-121*01	IGKV4-91*01	IGKV14-100*01	IGKV4-70*01	IGKV9-124*01	IGKV9-124*01	IGKV17-121*01
	IGKV9-120*01	IGKV14-100*01	IGKV9-120*01	IGKV14-100*01	IGKV9-120*01	IGKV9-120*01	IGKV14-111*01 F	IGKV9-120*01 F	IGKV14-100*01	IGKV9-120*01	IGKV14-100*01	IGKV17-121*01	IGKV14-100*01	IGKV17-121*01	IGKV4-91*01	IGKV14-100*01	IGKV4-70*01	IGKV9-124*01	IGKV9-124*01	IGKV17-121*01
	IGKV9-120*01	IGKV14-100*01	IGKV9-120*01	IGKV14-100*01	IGKV9-120*01	IGKV8-30*01	IGKV14-111*01 F	IGKV9-120*01 F	IGKV14-100*01	IGKV9-120*01	IGKV9-120*01	IGKV17-121*01	IGKV14-100*01	IGKV17-121*01	IGKV4-91*01	IGKV14-100*01	IGKV4-70*01	IGKV9-124*01	IGKV9-124*01	IGKV17-121*01
	IGKV9-120*01	IGKV14-100*01	IGKV9-120*01	IGKV14-100*01	IGKV9-120*01	IGKV8-30*01	IGKV14-111*01 F	IGKV9-120*01 F	IGKV14-100*01	IGKV9-120*01	IGKV14-100*01	IGKV17-121*01	IGKV14-100*01	IGKV17-121*01	IGKV4-91*01	IGKV14-100*01	IGKV4-70*01		IGKV9-124*01	IGKV17-121*01
	IGKV9-120*01	IGKV14-100*01	IGKV9-120*01	IGKV14-100*01	IGKV9-120*01	IGKV8-30*01	IGKV14-111*01 F	IGKV9-120*01 F	IGKV14-100*01	IGKV9-120*01	IGKV14-100*01	IGKV17-121*01	IGKV14-100*01	IGKV17-121*01	IGKV17-121*01	IGKV14-100*01	IGKV4-70*01	IGKV9-124*01	IGKV9-124*01	IGKV17-121*01
	IGKV9-120*01	IGKV14-100*01	IGKV9-120*01	IGKV14-100*01	IGKV9-120*01	IGKV8-30*01	IGKV14-111*01 F	IGKV9-120*01 F	IGKV14-100*01	IGKV9-120*01	IGKV9-120*01	IGKV17-121*01	IGKV9-120*01	IGKV17-121*01	IGKV17-121*01	IGKV14-100*01	IGKV4-70*01	IGKV9-124*01	IGKV9-124*01	IGKV17-121*01
	IGKV9-120*01	IGKV14-100*01	IGKV9-120*01	IGKV14-100*01	IGKV9-120*01	IGKV8-30*01	IGKV14-111*01 F	IGKV9-120*01 F	IGKV14-100*01	IGKV9-120*01	IGKV9-120*01	IGKV17-121*01	IGKV14-100*01	IGKV17-121*01	IGKV17-121*01	IGKV14-100*01	IGKV4-70*01	IGKV9-124*01	IGKV9-124*01	IGKV17-121*01
	IGKV9-120*01	IGKV14-100*01	IGKV9-120*01	IGKV14-100*01	IGKV9-120*01	IGKV8-30*01	IGKV14-111*01 F	IGKV9-120*01 F	IGKV4-57*01	IGKV9-120*01	IGKV9-120*01	IGKV17-121*01	IGKV14-100*01	IGKV17-121*01	IGKV4-91*01	IGKV14-100*01	IGKV4-70*01	IGKV9-124*01	IGKV9-124*01	IGKV17-121*01
	IGKV9-120*01	IGKV14-100*01	IGKV9-120*01	IGKV14-100*01	IGKV9-120*01	IGKV9-120*01	IGKV14-111*01 F	IGKV9-120*01 F	IGKV14-100*01	IGKV9-120*01	IGKV9-120*01	IGKV17-121*01	IGKV14-100*01	IGKV17-121*01	IGKV4-91*01	IGKV14-100*01	IGKV4-70*01	IGKV9-124*01	IGKV9-124*01	IGKV17-121*01
	IGKV9-120*01	IGKV14-100*01	IGKV9-120*01	IGKV14-100*01	IGKV9-120*01	IGKV8-30*01	IGKV14-111*01 F	IGKV9-120*01 F	IGKV14-100*01	IGKV9-120*01	IGKV14-100*01	IGKV17-121*01	IGKV9-120*01	IGKV17-121*01	IGKV4-91*01	IGKV14-100*01	IGKV4-70*01	IGKV9-124*01	IGKV9-124*01	IGKV17-121*01
	IGKV9-120*01	IGKV14-100*01	IGKV9-120*01	IGKV14-100*01	IGKV9-120*01	IGKV8-30*01	IGKV14-111*01 F	IGKV14-111*01 F	IGKV14-100*01	IGKV9-120*01	IGKV9-120*01	IGKV17-121*01	IGKV14-100*01	IGKV17-121*01	IGKV4-91*01	IGKV14-100*01	IGKV4-70*01	IGKV9-124*01	IGKV9-124*01	IGKV17-121*01
	IGKV9-120*01	IGKV14-100*01	IGKV9-120*01	IGKV14-100*01	IGKV9-120*01	IGKV8-30*01	IGKV14-111*01 F	IGKV14-111*01 F	IGKV14-100*01	IGKV9-120*01	IGKV14-100*01	IGKV17-121*01	IGKV14-100*01	IGKV17-121*01	IGKV4-91*01	IGKV14-100*01	IGKV4-70*01	IGKV9-124*01	IGKV9-124*01	IGKV17-121*01
	IGKV9-120*01	IGKV14-100*01	IGKV9-120*01	IGKV14-100*01	IGKV9-120*01	IGKV8-30*01	IGKV14-111*01 F	IGKV14-111*01 F	IGKV14-100*01	IGKV9-120*01	IGKV9-120*01	IGKV17-121*01	IGKV14-100*01	IGKV17-121*01	IGKV4-91*01	IGKV14-100*01	IGKV4-70*01	IGKV9-124*01	IGKV9-124*01	IGKV17-121*01
	IGKV9-120*01	IGKV14-100*01	IGKV9-120*01	IGKV14-100*01	IGKV9-120*01	IGKV8-30*01	IGKV14-111*01 F	IGKV14-111*01 F	IGKV14-100*01	IGKV9-120*01	IGKV14-100*01	IGKV17-121*01	IGKV14-100*01	IGKV17-121*01	IGKV4-91*01	IGKV14-100*01	IGKV4-70*01	IGKV9-124*01	IGKV9-124*01	IGKV17-121*01
	IGKV9-120*01	IGKV14-100*01	IGKV9-120*01	IGKV14-100*01	IGKV9-120*01	IGKV8-30*01	IGKV14-111*01 F	IGKV14-111*01 F	IGKV3-4*01	IGKV9-120*01	IGKV14-100*01	IGKV17-121*01	IGKV14-100*01	IGKV17-121*01	IGKV17-121*01	IGKV14-100*01	IGKV4-70*01	IGKV9-124*01	IGKV9-124*01	IGKV17-121*01
	IGKV9-120*01	IGKV14-100*01	IGKV9-120*01	IGKV14-100*01	IGKV9-120*01	IGKV8-30*01	IGKV14-111*01 F	IGKV9-120*01 F	IGKV14-100*01	IGKV9-120*01	IGKV14-100*01	IGKV17-121*01	IGKV9-120*01	IGKV17-121*01	IGKV17-121*01	IGKV14-100*01	IGKV4-70*01	IGKV9-124*01	IGKV9-124*01	IGKV17-121*01
	IGKV9-120*01	IGKV14-100*01	IGKV9-120*01	IGKV14-100*01	IGKV9-120*01	IGKV9-120*01	IGKV14-111*01 F	IGKV14-111*01 F	IGKV14-100*01	IGKV9-120*01	IGKV14-100*01	IGKV17-121*01	IGKV9-120*01	IGKV17-121*01	IGKV4-91*01	IGKV14-100*01	IGKV4-70*01	IGKV9-124*01	IGKV9-124*01	IGKV17-121*01
	IGKV9-120*01	IGKV14-100*01	IGKV9-120*01	IGKV14-100*01	IGKV9-120*01	IGKV8-30*01	IGKV14-111*01 F	IGKV9-120*01 F	IGKV17-121*01	IGKV9-120*01	IGKV9-120*01	IGKV17-121*01	IGKV14-100*01	IGKV17-121*01	IGKV4-91*01	IGKV14-100*01	IGKV4-70*01	IGKV9-124*01	IGKV9-124*01	IGKV17-121*01
	IGKV9-120*01	IGKV14-100*01	IGKV9-120*01	IGKV14-100*01	IGKV9-120*01	IGKV8-30*01	IGKV14-111*01 F	IGKV9-120*01 F	IGKV14-100*01	IGKV9-120*01	IGKV14-100*01	IGKV17-121*01	IGKV14-100*01	IGKV17-121*01	IGKV17-121*01	IGKV14-100*01	IGKV4-70*01	IGKV9-124*01	IGKV9-124*01	IGKV17-121*01
	IGKV9-120*01	IGKV14-100*01	IGKV9-120*01	IGKV14-100*01	IGKV9-120*01	IGKV9-120*01	IGKV14-111*01 F	IGKV9-120*01 F	IGKV14-100*01	IGKV9-120*01	IGKV9-120*01	IGKV17-121*01	IGKV9-120*01	IGKV17-121*01	IGKV17-121*01	IGKV14-100*01	IGKV4-70*01	IGKV9-124*01	IGKV9-124*01	IGKV17-121*01
	IGKV9-120*01	IGKV14-100*01	IGKV9-120*01	IGKV14-100*01	IGKV9-120*01	IGKV8-30*01	IGKV14-111*01 F	IGKV9-120*01 F	IGKV14-100*01	IGKV9-120*01	IGKV14-100*01	IGKV17-121*01	IGKV14-100*01	IGKV17-121*01	IGKV4-91*01	IGKV14-100*01	IGKV4-70*01	IGKV9-124*01	IGKV9-124*01	IGKV17-121*01
	IGKV9-120*01	IGKV14-100*01	IGKV9-120*01	IGKV14-100*01	IGKV9-120*01	IGKV8-30*01	IGKV14-111*01 F	IGKV9-120*01 F	IGKV14-100*01	IGKV9-120*01	IGKV9-120*01	IGKV17-121*01	IGKV14-100*01	IGKV17-121*01	IGKV4-91*01	IGKV14-100*01	IGKV4-70*01	IGKV9-124*01	IGKV9-124*01	IGKV17-121*01
	IGKV9-120*01	IGKV14-100*01	IGKV9-120*01	IGKV14-100*01	IGKV9-120*01	IGKV8-30*01	IGKV14-111*01 F	IGKV9-120*01 F	IGKV14-100*01	IGKV9-120*01	IGKV9-120*01	IGKV17-121*01	IGKV14-100*01	IGKV17-121*01	IGKV17-121*01	IGKV14-100*01	IGKV4-70*01	IGKV9-124*01	IGKV9-124*01	IGKV17-121*01
	IGKV9-120*01	IGKV14-100*01	IGKV9-120*01	IGKV14-100*01	IGKV9-120*01	IGKV8-30*01	IGKV14-111*01 F	IGKV9-120*01 F	IGKV1-135*01	IGKV9-120*01	IGKV14-100*01	IGKV17-121*01	IGKV14-100*01	IGKV17-121*01	IGKV4-91*01	IGKV14-100*01	IGKV4-70*01	IGKV4-53*01	IGKV9-124*01	IGKV17-121*01
	IGKV9-120*01	IGKV14-100*01	IGKV9-120*01	IGKV14-100*01	IGKV9-120*01	IGKV8-30*01	IGKV14-111*01 F	IGKV1-135*01 F	IGKV14-100*01	IGKV9-120*01	IGKV9-120*01	IGKV17-121*01	IGKV14-100*01	IGKV17-121*01	IGKV4-91*01	IGKV14-100*01	IGKV4-70*01	IGKV9-124*01	IGKV9-124*01	IGKV17-121*01
	IGKV9-120*01	IGKV14-100*01	IGKV9-120*01	IGKV14-100*01	IGKV9-120*01	IGKV8-30*01	IGKV14-111*01 F	IGKV9-120*01 F	IGKV14-100*01	IGKV9-120*01	IGKV9-120*01	IGKV17-121*01	IGKV14-100*01	IGKV17-121*01	IGKV4-91*01	IGKV14-100*01	IGKV4-70*01	IGKV9-124*01	IGKV9-124*01	IGKV17-121*01
	IGKV9-120*01	IGKV14-100*01	IGKV9-120*01	IGKV14-100*01	IGKV9-120*01	IGKV8-30*01	IGKV14-111*01 F	IGKV14-111*01 F	IGKV14-100*01	IGKV9-120*01	IGKV14-100*01	IGKV17-121*01	IGKV14-100*01	IGKV17-121*01	IGKV17-121*01	IGKV14-100*01	IGKV4-70*01	IGKV9-124*01	IGKV9-124*01	IGKV17-121*01
	IGKV9-120*01	IGKV14-100*01	IGKV9-120*01	IGKV14-100*01	IGKV9-120*01	IGKV8-30*01	IGKV14-111*01 F	IGKV9-120*01 F	IGKV1-110*01	IGKV9-120*01	IGKV14-100*01	IGKV17-121*01	IGKV14-100*01	IGKV17-121*01	IGKV17-121*01	IGKV14-100*01	IGKV4-70*01	IGKV9-124*01	IGKV9-124*01	IGKV17-121*01
	IGKV9-120*01	IGKV14-100*01	IGKV9-120*01	IGKV14-100*01	IGKV9-120*01	IGKV8-30*01	IGKV14-111*01 F	IGKV9-120*01 F	IGKV14-100*01	IGKV9-120*01	IGKV14-100*01	IGKV17-121*01	IGKV14-100*01	IGKV17-121*01	IGKV17-121*01	IGKV14-100*01	IGKV4-70*01	IGKV9-124*01	IGKV9-124*01	IGKV17-121*01
	IGKV9-120*01	IGKV14-100*01	IGKV9-120*01	IGKV14-100*01	IGKV9-120*01	IGKV8-30*01	IGKV14-111*01 F	IGKV9-120*01 F	IGKV14-100*01	IGKV9-120*01	IGKV14-100*01	IGKV17-121*01	IGKV9-120*01	IGKV17-121*01	IGKV4-91*01	IGKV14-100*01	IGKV4-70*01	IGKV9-124*01	IGKV9-124*01	IGKV17-121*01
	IGKV9-120*01	IGKV14-100*01	IGKV9-120*01	IGKV14-100*01	IGKV9-120*01	IGKV8-30*01	IGKV14-111*01 F	IGKV9-120*01 F	IGKV14-100*01	IGKV9-120*01	IGKV9-120*01	IGKV17-121*01	IGKV9-120*01	IGKV17-121*01	IGKV4-91*01	IGKV14-100*01	IGKV4-70*01	IGKV9-124*01	IGKV9-124*01	IGKV17-121*01
	IGKV9-120*01	IGKV14-100*01	IGKV9-120*01	IGKV14-100*01	IGKV9-120*01	IGKV8-30*01	IGKV14-111*01 F	IGKV9-120*01 F	IGKV14-100*01	IGKV9-120*01	IGKV9-120*01	IGKV17-121*01	IGKV9-120*01	IGKV17-121*01	IGKV4-91*01	IGKV14-100*01	IGKV4-70*01	IGKV9-124*01	IGKV9-124*01	IGKV17-121*01
	IGKV9-120*01	IGKV14-100*01	IGKV9-120*01	IGKV14-100*01	IGKV9-120*01	IGKV8-30*01	IGKV14-111*01 F	IGKV9-120*01 F	IGKV14-100*01	IGKV9-120*01	IGKV14-100*01	IGKV17-121*01	IGKV14-100*01	IGKV17-121*01	IGKV17-121*01	IGKV14-100*01	IGKV4-70*01	IGKV9-124*01	IGKV9-124*01	IGKV17-121*01
	IGKV9-120*01	IGKV14-100*01	IGKV9-120*01	IGKV14-100*01	IGKV9-120*01	IGKV8-30*01	IGKV14-111*01 F	IGKV9-120*01 F	IGKV14-100*01	IGKV9-120*01	IGKV9-120*01	IGKV17-121*01	IGKV14-100*01	IGKV17-121*01	IGKV17-121*01	IGKV14-100*01	IGKV4-70*01	IGKV9-124*01	IGKV9-124*01	IGKV17-121*01
	IGKV9-120*01	IGKV14-100*01	IGKV9-120*01	IGKV14-100*01	IGKV9-120*01	IGKV9-120*01	IGKV14-111*01 F	IGKV9-120*01 F	IGKV14-100*01	IGKV9-120*01	IGKV14-100*01	IGKV17-121*01	IGKV9-120*01	IGKV17-121*01	IGKV4-91*01	IGKV14-100*01	IGKV4-70*01	IGKV9-124*01	IGKV9-124*01	IGKV17-121*01
	IGKV9-120*01	IGKV14-100*01	IGKV9-120*01	IGKV14-100*01	IGKV9-120*01	IGKV8-30*01	IGKV14-111*01 F	IGKV14-111*01 F	IGKV14-100*01	IGKV9-120*01	IGKV9-120*01	IGKV17-121*01	IGKV9-120*01	IGKV17-121*01	IGKV4-91*01	IGKV14-100*01	IGKV4-70*01	IGKV9-124*01	IGKV9-124*01	IGKV17-121*01
	IGKV9-120*01	IGKV14-100*01	IGKV9-120*01	IGKV14-100*01	IGKV9-120*01	IGKV8-30*01	IGKV14-111*01 F	IGKV14-111*01 F	IGKV14-100*01	IGKV9-120*01	IGKV14-100*01	IGKV17-121*01	IGKV14-100*01	IGKV17-121*01	IGKV17-121*01	IGKV14-100*01	IGKV4-70*01	IGKV9-124*01	IGKV9-124*01	IGKV17-121*01
	IGKV9-120*01	IGKV14-100*01	IGKV9-120*01	IGKV14-100*01	IGKV9-120*01	IGKV8-30*01	IGKV14-111*01 F	IGKV1-135*01 F	IGKV14-100*01	IGKV9-120*01	IGKV14-100*01	IGKV17-121*01	IGKV14-100*01	IGKV17-121*01	IGKV4-91*01	IGKV14-100*01	IGKV4-70*01	IGKV9-124*01	IGKV9-124*01	IGKV17-121*01
	IGKV9-120*01	IGKV14-100*01	IGKV9-120*01	IGKV14-100*01	IGKV9-120*01	IGKV8-30*01	IGKV14-111*01 F	IGKV9-120*01 F	IGKV14-100*01	IGKV9-120*01	IGKV9-120*01	IGKV17-121*01	IGKV14-100*01	IGKV17-121*01	IGKV17-121*01	IGKV14-100*01	IGKV4-70*01	IGKV9-124*01	IGKV9-124*01	IGKV17-121*01
	IGKV9-120*01	IGKV14-100*01	IGKV9-120*01	IGKV14-100*01	IGKV9-120*01	IGKV8-30*01	IGKV14-111*01 F	IGKV9-120*01 F	IGKV14-100*01	IGKV9-120*01	IGKV14-100*01	IGKV17-121*01	IGKV14-100*01	IGKV17-121*01	IGKV4-91*01	IGKV14-100*01	IGKV4-70*01	IGKV9-124*01	IGKV9-124*01	IGKV17-121*01
	IGKV9-120*01	IGKV14-100*01	IGKV9-120*01	IGKV14-100*01	IGKV9-120*01	IGKV8-30*01	IGKV14-111*01 F	IGKV14-111*01 F	IGKV1-135*01	IGKV9-120*01	IGKV14-100*01	IGKV17-121*01	IGKV14-100*01	IGKV17-121*01	IGKV17-121*01	IGKV14-100*01	IGKV4-70*01	IGKV9-124*01	IGKV9-124*01	IGKV17-121*01
	IGKV9-120*01	IGKV14-100*01	IGKV9-120*01	IGKV14-100*01	IGKV9-120*01	IGKV8-30*01	IGKV14-111*01 F	IGKV9-120*01 F	IGKV14-100*01	IGKV9-120*01	IGKV9-120*01	IGKV17-121*01	IGKV14-100*01	IGKV17-121*01	IGKV4-91*01	IGKV14-100*01	IGKV4-70*01	IGKV9-124*01	IGKV9-124*01	IGKV17-121*01
	IGKV9-120*01	IGKV14-100*01	IGKV9-120*01	IGKV14-100*01	IGKV9-120*01	IGKV9-120*01	IGKV14-111*01 F	IGKV9-120*01 F	IGKV14-100*01	IGKV9-120*01	IGKV9-120*01	IGKV17-121*01	IGKV9-120*01	IGKV17-121*01	IGKV4-91*01	IGKV14-100*01	IGKV4-70*01	IGKV9-124*01	IGKV9-124*01	IGKV17-121*01
	IGKV9-120*01	IGKV14-100*01	IGKV9-120*01	IGKV14-100*01	IGKV9-120*01	IGKV8-30*01	IGKV14-111*01 F	IGKV14-111*01 F	IGKV14-100*01	IGKV9-120*01	IGKV9-120*01	IGKV17-121*01	IGKV14-100*01	IGKV17-121*01	IGKV17-121*01	IGKV14-100*01	IGKV4-70*01	IGKV9-124*01	IGKV9-124*01	IGKV17-121*01
	IGKV9-120*01	IGKV14-100*01	IGKV9-120*01	IGKV14-100*01	IGKV9-120*01	IGKV8-30*01	IGKV14-111*01 F	IGKV9-120*01 F	IGKV14-100*01	IGKV9-120*01	IGKV14-100*01	IGKV17-121*01	IGKV14-100*01	IGKV17-121*01	IGKV17-121*01	IGKV14-100*01	IGKV4-70*01	IGKV9-124*01	IGKV9-124*01	IGKV17-121*01
	IGKV9-120*01	IGKV14-100*01	IGKV9-120*01	IGKV14-100*01	IGKV9-120*01	IGKV8-30*01	IGKV14-111*01 F	IGKV9-120*01 F	IGKV14-100*01	IGKV9-120*01	IGKV14-100*01	IGKV17-121*01	IGKV14-100*01	IGKV17-121*01	IGKV17-121*01	IGKV14-100*01	IGKV4-70*01	IGKV9-124*01	IGKV9-124*01	IGKV17-121*01
	IGKV9-120*01	IGKV14-100*01	IGKV9-120*01	IGKV14-100*01	IGKV9-120*01	IGKV8-30*01	IGKV14-111*01 F	IGKV9-120*01 F	IGKV1-110*01	IGKV9-120*01	IGKV9-120*01	IGKV17-121*01	IGKV14-100*01	IGKV17-121*01	IGKV4-91*01	IGKV14-100*01	IGKV4-70*01	IGKV9-124*01	IGKV9-124*01	IGKV17-121*01
	IGKV9-120*01	IGKV14-100*01	IGKV9-120*01	IGKV14-100*01	IGKV9-120*01	IGKV8-30*01	IGKV14-111*01 F	IGKV14-111*01 F	IGKV14-100*01	IGKV9-120*01	IGKV14-100*01	IGKV17-121*01	IGKV14-100*01	IGKV17-121*01	IGKV4-91*01	IGKV14-100*01	IGKV4-70*01	IGKV9-124*01	IGKV9-124*01	IGKV17-121*01
	IGKV9-120*01	IGKV14-100*01	IGKV9-120*01	IGKV14-100*01	IGKV9-120*01	IGKV8-30*01	IGKV14-111*01 F	IGKV14-111*01 F	IGKV14-100*01	IGKV9-120*01	IGKV14-100*01	IGKV17-121*01	IGKV14-100*01	IGKV17-121*01	IGKV4-91*01	IGKV14-100*01	IGKV4-70*01	IGKV9-124*01	IGKV9-124*01	IGKV17-121*01
	IGKV9-120*01	IGKV14-100*01	IGKV9-120*01	IGKV14-100*01	IGKV9-120*01	IGKV8-30*01	IGKV14-111*01 F	IGKV9-120*01 F	IGKV17-121*01	IGKV9-120*01	IGKV14-100*01	IGKV17-121*01	IGKV9-120*01	IGKV17-121*01	IGKV17-121*01	IGKV14-100*01	IGKV4-70*01	IGKV9-124*01	IGKV9-124*01	IGKV17-121*01
	IGKV9-120*01	IGKV14-100*01	IGKV9-120*01	IGKV14-100*01	IGKV9-120*01	IGKV9-120*01	IGKV14-111*01 F	IGKV9-120*01 F	IGKV14-100*01	IGKV9-120*01	IGKV9-120*01	IGKV17-121*01	IGKV14-100*01	IGKV17-121*01	IGKV17-121*01	IGKV14-100*01	IGKV4-70*01	IGKV9-124*01	IGKV9-124*01	IGKV17-121*01
	IGKV9-120*01	IGKV14-100*01	IGKV9-120*01	IGKV14-100*01	IGKV9-120*01	IGKV9-120*01	IGKV14-111*01 F	IGKV14-111*01 F	IGKV14-100*01	IGKV9-120*01	IGKV14-100*01	IGKV17-121*01	IGKV14-100*01	IGKV17-121*01	IGKV4-91*01	IGKV14-100*01	IGKV4-70*01	IGKV9-124*01	IGKV9-124*01	IGKV17-121*01
	IGKV9-120*01	IGKV14-100*01	IGKV9-120*01	IGKV14-100*01	IGKV9-120*01	IGKV8-30*01	IGKV14-111*01 F	IGKV14-111*01 F	IGKV14-100*01	IGKV9-120*01	IGKV14-100*01	IGKV17-121*01	IGKV9-120*01	IGKV17-121*01	IGKV4-91*01	IGKV14-100*01	IGKV4-70*01	IGKV9-124*01	IGKV9-124*01	IGKV17-121*01
	IGKV9-120*01	IGKV14-100*01	IGKV9-120*01	IGKV14-100*01	IGKV9-120*01	IGKV9-120*01	IGKV14-111*01 F	IGKV9-120*01 F	IGKV14-100*01	IGKV9-120*01	IGKV9-120*01	IGKV17-121*01	IGKV14-100*01	IGKV17-121*01	IGKV17-121*01	IGKV14-100*01	IGKV4-70*01	IGKV9-124*01	IGKV9-124*01	IGKV17-121*01
	IGKV9-120*01	IGKV14-100*01	IGKV9-120*01	IGKV14-100*01	IGKV9-120*01	IGKV8-30*01	IGKV14-111*01 F	IGKV9-120*01 F	IGKV14-100*01	IGKV9-120*01	IGKV14-100*01	IGKV17-121*01	IGKV9-120*01	IGKV17-121*01	IGKV4-91*01	IGKV14-100*01	IGKV4-70*01	IGKV9-124*01	IGKV9-124*01	IGKV17-121*01
	IGKV9-120*01	IGKV14-100*01	IGKV9-120*01	IGKV14-100*01	IGKV9-120*01	IGKV8-30*01	IGKV14-111*01 F	IGKV9-120*01 F	IGKV14-100*01	IGKV9-120*01	IGKV14-100*01	IGKV17-121*01	IGKV9-120*01	IGKV17-121*01	IGKV17-121*01	IGKV14-100*01	IGKV4-70*01	IGKV9-124*01	IGKV9-124*01	IGKV17-121*01
	IGKV9-120*01	IGKV14-100*01	IGKV9-120*01	IGKV14-100*01	IGKV9-120*01	IGKV8-30*01	IGKV14-111*01 F	IGKV14-111*01 F	IGKV14-100*01	IGKV9-120*01	IGKV9-120*01	IGKV17-121*01	IGKV14-100*01	IGKV17-121*01	IGKV4-91*01	IGKV14-100*01	IGKV4-70*01	IGKV9-124*01	IGKV9-124*01	IGKV17-121*01
	IGKV9-120*01	IGKV14-100*01	IGKV9-120*01	IGKV14-100*01	IGKV9-120*01	IGKV9-120*01	IGKV14-111*01 F	IGKV9-120*01 F	IGKV14-100*01	IGKV9-120*01	IGKV14-100*01	IGKV17-121*01	IGKV14-100*01	IGKV17-121*01	IGKV4-91*01	IGKV14-100*01	IGKV4-70*01	IGKV9-124*01	IGKV9-124*01	IGKV17-121*01
	IGKV9-120*01	IGKV14-100*01	IGKV9-120*01	IGKV14-100*01	IGKV9-120*01	IGKV8-30*01	IGKV14-111*01 F	IGKV9-120*01 F	IGKV14-100*01	IGKV9-120*01	IGKV9-120*01	IGKV17-121*01	IGKV14-100*01	IGKV17-121*01	IGKV4-91*01	IGKV14-100*01	IGKV4-70*01	IGKV9-124*01	IGKV9-124*01	IGKV17-121*01
	IGKV9-120*01	IGKV14-100*01	IGKV9-120*01	IGKV14-100*01	IGKV9-120*01	IGKV8-30*01	IGKV14-111*01 F	IGKV1-110*01 F	IGKV14-100*01	IGKV9-120*01	IGKV9-120*01	IGKV17-121*01	IGKV14-100*01	IGKV17-121*01	IGKV17-121*01	IGKV14-100*01	IGKV4-70*01	IGKV9-124*01	IGKV9-124*01	IGKV17-121*01
	IGKV9-120*01	IGKV14-100*01	IGKV9-120*01	IGKV14-100*01	IGKV9-120*01	IGKV8-30*01	IGKV14-111*01 F	IGKV14-111*01 F	IGKV14-100*01	IGKV9-120*01	IGKV14-100*01	IGKV17-121*01	IGKV9-120*01	IGKV17-121*01	IGKV17-121*01	IGKV14-100*01	IGKV4-70*01	IGKV9-124*01	IGKV9-124*01	IGKV17-121*01
	IGKV9-120*01	IGKV14-100*01	IGKV9-120*01	IGKV14-100*01	IGKV9-120*01	IGKV8-30*01	IGKV14-111*01 F	IGKV9-120*01 F	IGKV14-100*01	IGKV9-120*01	IGKV14-100*01	IGKV17-121*01	IGKV14-100*01	IGKV17-121*01	IGKV4-91*01	IGKV14-100*01	IGKV4-70*01	IGKV9-124*01	IGKV9-124*01	IGKV17-121*01
	IGKV9-120*01	IGKV14-100*01	IGKV9-120*01	IGKV14-100*01	IGKV9-120*01	IGKV9-120*01	IGKV14-111*01 F	IGKV9-120*01 F	IGKV14-100*01	IGKV9-120*01	IGKV9-120*01	IGKV17-121*01	IGKV14-100*01	IGKV17-121*01	IGKV4-91*01	IGKV14-100*01	IGKV4-70*01	IGKV9-124*01	IGKV9-124*01	IGKV17-121*01
	IGKV9-120*01	IGKV14-100*01	IGKV9-120*01	IGKV14-100*01	IGKV9-120*01	IGKV8-30*01	IGKV14-111*01 F	IGKV14-111*01 F	IGKV14-100*01	IGKV9-120*01	IGKV14-100*01	IGKV17-121*01	IGKV14-100*01	IGKV17-121*01	IGKV4-91*01	IGKV14-100*01	IGKV4-70*01	IGKV9-124*01	IGKV9-124*01	IGKV17-121*01
	IGKV9-120*01	IGKV14-100*01	IGKV9-120*01	IGKV14-100*01	IGKV9-120*01	IGKV9-120*01	IGKV14-111*01 F	IGKV14-111*01 F	IGKV14-100*01	IGKV9-120*01	IGKV9-120*01	IGKV17-121*01	IGKV9-120*01	IGKV17-121*01	IGKV4-91*01	IGKV14-100*01	IGKV4-70*01	IGKV9-124*01	IGKV9-124*01	IGKV17-121*01
	IGKV9-120*01	IGKV14-100*01	IGKV9-120*01	IGKV14-100*01	IGKV9-120*01	IGKV8-30*01	IGKV14-111*01 F	IGKV17-121*01 F	IGKV14-100*01	IGKV9-120*01	IGKV14-100*01	IGKV17-121*01	IGKV14-100*01	IGKV17-121*01	IGKV4-91*01	IGKV14-100*01	IGKV4-70*01	IGKV9-124*01	IGKV9-124*01	IGKV17-121*01
	IGKV9-120*01	IGKV14-100*01	IGKV9-120*01	IGKV14-100*01	IGKV9-120*01	IGKV8-30*01	IGKV14-111*01 F	IGKV9-120*01 F	IGKV14-100*01	IGKV9-120*01	IGKV9-120*01	IGKV17-121*01	IGKV14-100*01	IGKV17-121*01	IGKV17-121*01	IGKV14-100*01	IGKV4-70*01	IGKV9-124*01	IGKV9-124*01	IGKV17-121*01
	IGKV9-120*01	IGKV14-100*01	IGKV9-120*01	IGKV14-100*01	IGKV9-120*01	IGKV8-30*01	IGKV14-111*01 F	IGKV9-120*01 F	IGKV14-100*01	IGKV9-120*01	IGKV14-100*01	IGKV17-121*01	IGKV14-100*01	IGKV17-121*01	IGKV4-91*01	IGKV14-100*01	IGKV4-70*01	IGKV9-124*01	IGKV9-124*01	IGKV17-121*01
	IGKV9-120*01	IGKV14-100*01	IGKV9-120*01	IGKV14-100*01	IGKV9-120*01	IGKV9-120*01	IGKV14-111*01 F	IGKV9-120*01 F	IGKV14-100*01	IGKV9-120*01	IGKV14-100*01	IGKV17-121*01	IGKV14-100*01	IGKV17-121*01	IGKV4-91*01	IGKV14-100*01	IGKV4-70*01	IGKV9-124*01	IGKV9-124*01	IGKV17-121*01
	IGKV9-120*01	IGKV14-100*01	IGKV9-120*01	IGKV14-100*01	IGKV9-120*01	IGKV8-30*01	IGKV14-111*01 F	IGKV9-120*01 F	IGKV14-100*01	IGKV9-120*01	IGKV9-120*01	IGKV17-121*01	IGKV14-100*01	IGKV17-121*01	IGKV4-91*01	IGKV14-100*01	IGKV4-70*01	IGKV9-124*01	IGKV9-124*01	IGKV17-121*01
	IGKV9-120*01	IGKV14-100*01	IGKV9-120*01	IGKV14-100*01	IGKV9-120*01	IGKV8-30*01	IGKV14-111*01 F	IGKV9-120*01 F	IGKV14-100*01	IGKV9-120*01	IGKV9-120*01	IGKV17-121*01	IGKV14-100*01	IGKV17-121*01	IGKV17-121*01	IGKV14-100*01	IGKV4-70*01	IGKV9-124*01	IGKV9-124*01	IGKV17-121*01
	IGKV9-120*01	IGKV14-100*01	IGKV9-120*01	IGKV14-100*01	IGKV9-120*01	IGKV8-30*01	IGKV14-111*01 F	IGKV9-120*01 F	IGKV14-100*01	IGKV9-120*01	IGKV14-100*01	IGKV17-121*01	IGKV14-100*01	IGKV17-121*01	IGKV4-91*01	IGKV14-100*01	IGKV4-70*01	IGKV9-124*01	IGKV9-124*01	IGKV17-121*01
	IGKV9-120*01	IGKV14-100*01	IGKV9-120*01	IGKV14-100*01	IGKV9-120*01	IGKV8-30*01	IGKV14-111*01 F	IGKV9-120*01 F	IGKV14-100*01	IGKV9-120*01	IGKV14-100*01	IGKV17-121*01	IGKV14-100*01	IGKV17-121*01	IGKV17-121*01	IGKV14-100*01	IGKV4-70*01	IGKV9-124*01	IGKV9-124*01	IGKV17-121*01
	IGKV9-120*01	IGKV14-100*01	IGKV9-120*01	IGKV14-100*01	IGKV9-120*01	IGKV8-30*01	IGKV14-111*01 F	IGKV9-120*01 F	IGKV14-100*01	IGKV9-120*01	IGKV9-120*01	IGKV17-121*01	IGKV14-100*01	IGKV17-121*01	IGKV17-121*01	IGKV14-100*01	IGKV4-70*01	IGKV9-124*01	IGKV9-124*01	IGKV17-121*01
	IGKV9-120*01	IGKV14-100*01	IGKV9-120*01	IGKV14-100*01	IGKV9-120*01	IGKV8-30*01	IGKV14-111*01 F	IGKV9-120*01 F	IGKV14-100*01	IGKV9-120*01	IGKV14-100*01	IGKV17-121*01	IGKV14-100*01	IGKV17-121*01	IGKV4-91*01	IGKV14-100*01	IGKV4-70*01	IGKV9-124*01	IGKV9-124*01	IGKV17-121*01
	IGKV9-120*01	IGKV14-100*01	IGKV9-120*01	IGKV14-100*01	IGKV9-120*01	IGKV8-30*01	IGKV14-111*01 F	IGKV9-120*01 F	IGKV14-100*01	IGKV9-120*01	IGKV14-100*01	IGKV17-121*01	IGKV14-100*01	IGKV17-121*01	IGKV4-91*01	IGKV14-100*01	IGKV4-70*01	IGKV9-124*01	IGKV9-124*01	IGKV17-121*01
	IGKV9-120*01	IGKV14-100*01	IGKV9-120*01	IGKV14-100*01	IGKV9-120*01	IGKV8-30*01	IGKV14-111*01 F	IGKV1-135*01 F	IGKV14-100*01	IGKV9-120*01	IGKV14-100*01	IGKV17-121*01	IGKV9-120*01	IGKV17-121*01	IGKV17-121*01	IGKV14-100*01	IGKV4-70*01	IGKV9-124*01	IGKV9-124*01	IGKV17-121*01
	IGKV9-120*01	IGKV14-100*01	IGKV9-120*01	IGKV14-100*01	IGKV9-120*01	IGKV8-30*01	IGKV14-111*01 F	IGKV9-120*01 F	IGKV14-100*01	IGKV9-120*01	IGKV14-100*01	IGKV17-121*01	IGKV14-100*01	IGKV17-121*01	IGKV17-121*01	IGKV14-100*01	IGKV4-70*01	IGKV9-124*01	IGKV9-124*01	IGKV17-121*01
	IGKV9-120*01	IGKV14-100*01	IGKV9-120*01	IGKV14-100*01	IGKV9-120*01	IGKV8-30*01	IGKV14-111*01 F	IGKV9-120*01 F	IGKV1-135*01	IGKV9-120*01	IGKV9-120*01	IGKV17-121*01	IGKV9-120*01	IGKV17-121*01	IGKV17-121*01	IGKV14-100*01	IGKV4-70*01	IGKV9-124*01	IGKV9-124*01	IGKV17-121*01
	IGKV9-120*01	IGKV14-100*01	IGKV9-120*01	IGKV14-100*01	IGKV9-120*01	IGKV9-120*01	IGKV14-111*01 F	IGKV9-120*01 F	IGKV14-100*01	IGKV9-120*01	IGKV14-100*01	IGKV17-121*01	IGKV14-100*01	IGKV17-121*01	IGKV4-91*01	IGKV14-100*01	IGKV4-70*01	IGKV9-124*01	IGKV9-124*01	IGKV17-121*01
	IGKV9-120*01	IGKV14-100*01	IGKV9-120*01	IGKV14-100*01	IGKV9-120*01	IGKV8-30*01	IGKV14-111*01 F	IGKV9-120*01 F	IGKV14-100*01	IGKV9-120*01	IGKV9-120*01	IGKV17-121*01	IGKV14-100*01	IGKV17-121*01	IGKV4-91*01	IGKV14-100*01	IGKV4-70*01	IGKV9-124*01	IGKV9-124*01	IGKV17-121*01
	IGKV9-120*01	IGKV14-100*01	IGKV9-120*01	IGKV14-100*01	IGKV9-120*01	IGKV8-30*01	IGKV14-111*01 F	IGKV9-120*01 F	IGKV14-100*01	IGKV9-120*01	IGKV14-100*01	IGKV17-121*01	IGKV14-100*01	IGKV17-121*01	IGKV17-121*01	IGKV14-100*01	IGKV4-70*01	IGKV9-124*01	IGKV9-124*01	IGKV17-121*01
	IGKV9-120*01	IGKV14-100*01	IGKV9-120*01	IGKV14-100*01	IGKV9-120*01	IGKV8-30*01	IGKV14-111*01 F	IGKV9-120*01 F	IGKV17-121*01	IGKV9-120*01	IGKV14-100*01	IGKV17-121*01	IGKV14-100*01	IGKV17-121*01	IGKV17-121*01	IGKV14-100*01	IGKV4-70*01	IGKV9-124*01	IGKV9-124*01	IGKV17-121*01
	IGKV9-120*01	IGKV14-100*01	IGKV9-120*01	IGKV14-100*01	IGKV9-120*01	IGKV8-30*01	IGKV14-111*01 F	IGKV9-120*01 F	IGKV1-135*01	IGKV9-120*01	IGKV9-120*01	IGKV17-121*01	IGKV9-120*01	IGKV17-121*01	IGKV17-121*01	IGKV14-100*01	IGKV4-70*01	IGKV9-124*01	IGKV9-124*01	IGKV17-121*01
	IGKV9-120*01	IGKV14-100*01	IGKV9-120*01	IGKV14-100*01	IGKV9-120*01	IGKV8-30*01	IGKV14-111*01 F	IGKV9-120*01 F	IGKV14-100*01	IGKV9-120*01	IGKV14-100*01	IGKV17-121*01	IGKV14-100*01	IGKV17-121*01	IGKV17-121*01	IGKV14-100*01	IGKV4-70*01	IGKV9-124*01	IGKV9-124*01	IGKV17-121*01
	IGKV9-120*01	IGKV14-100*01	IGKV9-120*01	IGKV14-100*01	IGKV9-120*01	IGKV8-30*01	IGKV14-111*01 F	IGKV9-120*01 F	IGKV14-100*01	IGKV9-120*01	IGKV14-100*01	IGKV17-121*01	IGKV9-120*01	IGKV17-121*01	IGKV4-91*01	IGKV14-100*01	IGKV4-70*01	IGKV9-124*01	IGKV9-124*01	IGKV17-121*01
	IGKV9-120*01	IGKV14-100*01	IGKV9-120*01	IGKV14-100*01	IGKV9-120*01	IGKV8-30*01	IGKV14-111*01 F	IGKV9-120*01 F	IGKV14-100*01	IGKV9-120*01	IGKV9-120*01	IGKV17-121*01	IGKV9-120*01	IGKV17-121*01	IGKV4-91*01	IGKV14-100*01	IGKV4-70*01	IGKV9-124*01	IGKV9-124*01	IGKV17-121*01
	IGKV9-120*01	IGKV14-100*01	IGKV9-120*01	IGKV14-100*01	IGKV9-120*01	IGKV8-30*01	IGKV14-111*01 F	IGKV9-120*01 F	IGKV14-100*01	IGKV9-120*01	IGKV9-120*01	IGKV17-121*01	IGKV9-120*01	IGKV17-121*01	IGKV4-91*01	IGKV14-100*01	IGKV4-70*01	IGKV9-124*01	IGKV9-124*01	IGKV17-121*01
	IGKV9-120*01	IGKV14-100*01	IGKV9-120*01	IGKV14-100*01	IGKV9-120*01	IGKV9-120*01	IGKV14-111*01 F	IGKV9-120*01 F	IGKV17-121*01	IGKV9-120*01	IGKV14-100*01	IGKV17-121*01	IGKV14-100*01	IGKV17-121*01	IGKV4-91*01	IGKV14-100*01	IGKV4-70*01	IGKV9-124*01	IGKV9-124*01	IGKV17-121*01
	IGKV9-120*01	IGKV14-100*01	IGKV9-120*01	IGKV14-100*01	IGKV9-120*01	IGKV8-30*01	IGKV14-111*01 F	IGKV14-111*01 F	IGKV14-100*01	IGKV9-120*01	IGKV9-120*01	IGKV17-121*01	IGKV14-100*01	IGKV17-121*01	IGKV17-121*01	IGKV14-100*01	IGKV4-70*01	IGKV9-124*01	IGKV9-124*01	IGKV17-121*01
	IGKV9-120*01	IGKV14-100*01	IGKV9-120*01	IGKV14-100*01	IGKV9-120*01	IGKV8-30*01	IGKV14-111*01 F	IGKV14-111*01 F	IGKV14-100*01	IGKV9-120*01	IGKV9-120*01	IGKV17-121*01	IGKV14-100*01	IGKV17-121*01	IGKV4-91*01	IGKV14-100*01	IGKV4-70*01	IGKV9-124*01	IGKV9-124*01	IGKV17-121*01
	IGKV9-120*01	IGKV14-100*01	IGKV9-120*01	IGKV14-100*01	IGKV9-120*01	IGKV9-120*01	IGKV14-111*01 F	IGKV9-120*01 F	IGKV14-100*01	IGKV9-120*01	IGKV9-120*01	IGKV17-121*01	IGKV9-120*01	IGKV17-121*01	IGKV17-121*01	IGKV14-100*01	IGKV4-70*01	IGKV9-124*01	IGKV9-124*01	IGKV17-121*01
	IGKV9-120*01	IGKV14-100*01	IGKV9-120*01	IGKV14-100*01	IGKV9-120*01	IGKV8-30*01	IGKV14-111*01 F	IGKV9-120*01 F	IGKV14-100*01	IGKV9-120*01	IGKV14-100*01	IGKV17-121*01	IGKV14-100*01	IGKV17-121*01	IGKV17-121*01	IGKV14-100*01	IGKV4-70*01	IGKV9-124*01	IGKV9-124*01	IGKV17-121*01
	IGKV9-120*01	IGKV14-100*01	IGKV9-120*01	IGKV14-100*01	IGKV9-120*01	IGKV8-30*01	IGKV14-111*01 F	IGKV9-120*01 F	IGKV14-100*01	IGKV9-120*01	IGKV14-100*01	IGKV17-121*01	IGKV14-100*01	IGKV17-121*01	IGKV4-91*01	IGKV14-100*01	IGKV4-70*01	IGKV9-124*01	IGKV9-124*01	IGKV17-121*01
	IGKV9-120*01	IGKV14-100*01	IGKV9-120*01	IGKV14-100*01	IGKV9-120*01	IGKV8-30*01	IGKV14-111*01 F	IGKV9-120*01 F	IGKV4-58*01	IGKV9-120*01	IGKV9-120*01	IGKV17-121*01	IGKV9-120*01	IGKV17-121*01	IGKV4-91*01	IGKV14-100*01	IGKV4-70*01	IGKV9-124*01	IGKV9-124*01	IGKV17-121*01
	IGKV9-120*01	IGKV14-100*01	IGKV9-120*01	IGKV14-100*01	IGKV9-120*01	IGKV8-30*01	IGKV14-111*01 F	IGKV9-120*01 F	IGKV14-100*01	IGKV9-120*01	IGKV14-100*01	IGKV17-121*01	IGKV14-100*01	IGKV17-121*01	IGKV17-121*01	IGKV14-100*01	IGKV4-70*01	IGKV9-124*01	IGKV9-124*01	IGKV17-121*01
	IGKV9-120*01	IGKV14-100*01	IGKV9-120*01	IGKV14-100*01	IGKV9-120*01	IGKV8-30*01	IGKV14-111*01 F	IGKV9-120*01 F	IGKV14-100*01	IGKV9-120*01	IGKV14-100*01	IGKV17-121*01	IGKV9-120*01	IGKV17-121*01	IGKV4-91*01	IGKV14-100*01	IGKV4-70*01	IGKV9-124*01	IGKV9-124*01	IGKV17-121*01
	IGKV9-120*01	IGKV14-100*01	IGKV9-120*01	IGKV14-100*01	IGKV9-120*01	IGKV9-120*01	IGKV14-111*01 F	IGKV9-120*01 F	IGKV14-100*01	IGKV9-120*01	IGKV14-100*01	IGKV17-121*01	IGKV14-100*01	IGKV17-121*01	IGKV4-91*01	IGKV14-100*01	IGKV4-70*01	IGKV9-124*01	IGKV9-124*01	IGKV17-121*01
	IGKV9-120*01	IGKV14-100*01	IGKV9-120*01	IGKV14-100*01	IGKV9-120*01	IGKV8-30*01	IGKV14-111*01 F	IGKV9-120*01 F	IGKV14-100*01	IGKV9-120*01	IGKV14-100*01	IGKV17-121*01	IGKV14-100*01	IGKV17-121*01	IGKV17-121*01	IGKV14-100*01	IGKV4-70*01	IGKV9-124*01	IGKV9-124*01	IGKV17-121*01
	IGKV9-120*01	IGKV14-100*01	IGKV9-120*01	IGKV14-100*01	IGKV9-120*01	IGKV9-120*01	IGKV14-111*01 F	IGKV9-120*01 F	IGKV14-100*01	IGKV9-120*01	IGKV14-100*01	IGKV17-121*01	IGKV14-100*01	IGKV17-121*01	IGKV17-121*01	IGKV14-100*01	IGKV4-70*01	IGKV9-124*01	IGKV9-124*01	IGKV17-121*01
	IGKV9-120*01	IGKV14-100*01	IGKV9-120*01	IGKV14-100*01	IGKV9-120*01	IGKV9-120*01	IGKV14-111*01 F	IGKV9-120*01 F	IGKV14-100*01	IGKV9-120*01	IGKV9-120*01	IGKV17-121*01	IGKV14-100*01	IGKV17-121*01	IGKV4-91*01	IGKV14-100*01	IGKV4-70*01	IGKV9-124*01	IGKV9-124*01	IGKV17-121*01
	IGKV9-120*01	IGKV14-100*01	IGKV9-120*01	IGKV14-100*01	IGKV9-120*01	IGKV9-120*01	IGKV14-111*01 F	IGKV9-120*01 F	IGKV14-100*01	IGKV9-120*01	IGKV14-100*01	IGKV17-121*01	IGKV14-100*01	IGKV17-121*01	IGKV17-121*01	IGKV14-100*01	IGKV4-70*01	IGKV9-124*01	IGKV9-124*01	IGKV17-121*01
	IGKV9-120*01	IGKV14-100*01	IGKV9-120*01	IGKV14-100*01	IGKV9-120*01	IGKV9-120*01	IGKV14-111*01 F	IGKV14-111*01 F	IGKV14-100*01	IGKV9-120*01	IGKV14-100*01	IGKV17-121*01	IGKV14-100*01	IGKV17-121*01	IGKV17-121*01	IGKV14-100*01	IGKV4-70*01	IGKV9-124*01	IGKV9-124*01	IGKV17-121*01
	IGKV9-120*01	IGKV14-100*01	IGKV9-120*01	IGKV14-100*01	IGKV9-120*01	IGKV8-30*01	IGKV14-111*01 F	IGKV9-120*01 F	IGKV14-100*01	IGKV9-120*01	IGKV14-100*01	IGKV17-121*01	IGKV14-100*01	IGKV17-121*01	IGKV17-121*01	IGKV14-100*01	IGKV4-70*01	IGKV9-124*01	IGKV9-124*01	IGKV17-121*01
	IGKV9-120*01	IGKV14-100*01	IGKV9-120*01	IGKV14-100*01	IGKV9-120*01	IGKV9-120*01	IGKV14-111*01 F	IGKV9-120*01 F	IGKV14-100*01	IGKV9-120*01	IGKV14-100*01	IGKV17-121*01	IGKV14-100*01	IGKV17-121*01	IGKV4-91*01	IGKV14-100*01	IGKV4-70*01	IGKV9-124*01	IGKV9-124*01	IGKV17-121*01
	IGKV9-120*01	IGKV14-100*01	IGKV9-120*01	IGKV14-100*01	IGKV9-120*01	IGKV8-30*01	IGKV14-111*01 F	IGKV9-120*01 F	IGKV14-100*01	IGKV9-120*01	IGKV14-100*01	IGKV17-121*01	IGKV14-100*01	IGKV17-121*01	IGKV17-121*01	IGKV14-100*01	IGKV4-70*01	IGKV9-124*01	IGKV9-124*01	IGKV17-121*01
	IGKV9-120*01	IGKV14-100*01	IGKV9-120*01	IGKV14-100*01	IGKV9-120*01	IGKV8-30*01	IGKV14-111*01 F	IGKV9-120*01 F	IGKV14-100*01	IGKV9-120*01	IGKV9-120*01	IGKV17-121*01	IGKV14-100*01	IGKV17-121*01	IGKV4-91*01	IGKV14-100*01	IGKV4-70*01	IGKV9-124*01	IGKV9-124*01	IGKV17-121*01
	IGKV9-120*01	IGKV14-100*01	IGKV9-120*01	IGKV14-100*01	IGKV9-120*01	IGKV8-30*01	IGKV14-111*01 F	IGKV14-111*01 F	IGKV1-135*01	IGKV9-120*01	IGKV9-120*01	IGKV17-121*01	IGKV14-100*01	IGKV17-121*01	IGKV4-91*01	IGKV14-100*01	IGKV4-70*01	IGKV9-124*01	IGKV9-124*01	IGKV17-121*01
	IGKV9-120*01	IGKV14-100*01	IGKV9-120*01	IGKV14-100*01	IGKV9-120*01	IGKV8-30*01	IGKV14-111*01 F	IGKV9-120*01 F	IGKV14-100*01	IGKV9-120*01	IGKV9-120*01	IGKV17-121*01	IGKV14-100*01	IGKV17-121*01	IGKV17-121*01	IGKV14-100*01	IGKV4-70*01	IGKV9-124*01	IGKV9-124*01	IGKV17-121*01
	IGKV9-120*01	IGKV14-100*01	IGKV9-120*01	IGKV14-100*01	IGKV9-120*01	IGKV8-30*01	IGKV14-111*01 F	IGKV9-120*01 F	IGKV14-100*01	IGKV9-120*01	IGKV14-100*01	IGKV17-121*01	IGKV9-120*01	IGKV17-121*01	IGKV17-121*01	IGKV14-100*01	IGKV4-70*01	IGKV9-124*01	IGKV9-124*01	IGKV17-121*01
	IGKV9-120*01	IGKV14-100*01	IGKV9-120*01	IGKV14-100*01	IGKV9-120*01	IGKV8-30*01	IGKV14-111*01 F	IGKV9-120*01 F	IGKV14-100*01	IGKV9-120*01	IGKV14-100*01	IGKV17-121*01	IGKV9-120*01	IGKV17-121*01	IGKV4-91*01	IGKV14-100*01	IGKV4-70*01	IGKV9-124*01	IGKV9-124*01	IGKV17-121*01
	IGKV9-120*01	IGKV14-100*01	IGKV9-120*01	IGKV14-100*01	IGKV9-120*01	IGKV8-30*01	IGKV14-111*01 F	IGKV9-120*01 F	IGKV14-100*01	IGKV9-120*01	IGKV14-100*01	IGKV17-121*01	IGKV14-100*01	IGKV17-121*01	IGKV17-121*01	IGKV14-100*01	IGKV4-70*01	IGKV9-124*01	IGKV9-124*01	IGKV17-121*01
	IGKV9-120*01	IGKV14-100*01	IGKV9-120*01	IGKV14-100*01	IGKV9-120*01	IGKV8-30*01	IGKV14-111*01 F	IGKV9-120*01 F	IGKV17-121*01	IGKV9-120*01	IGKV14-100*01	IGKV17-121*01	IGKV14-100*01	IGKV17-121*01	IGKV4-91*01	IGKV14-100*01	IGKV4-70*01	IGKV9-124*01	IGKV9-124*01	IGKV17-121*01
	IGKV9-120*01	IGKV14-100*01	IGKV9-120*01	IGKV14-100*01	IGKV9-120*01	IGKV9-120*01	IGKV14-111*01 F	IGKV9-120*01 F	IGKV14-100*01	IGKV9-120*01	IGKV9-120*01	IGKV17-121*01	IGKV14-100*01	IGKV17-121*01	IGKV17-121*01	IGKV14-100*01	IGKV4-70*01	IGKV9-124*01	IGKV9-124*01	IGKV17-121*01
	IGKV9-120*01	IGKV14-100*01	IGKV9-120*01	IGKV14-100*01	IGKV9-120*01	IGKV8-30*01	IGKV14-111*01 F	IGKV9-120*01 F	IGKV14-100*01	IGKV9-120*01	IGKV14-100*01	IGKV17-121*01	IGKV14-100*01	IGKV17-121*01	IGKV17-121*01	IGKV14-100*01	IGKV4-70*01	IGKV9-124*01	IGKV9-124*01	IGKV17-121*01
	IGKV9-120*01	IGKV14-100*01	IGKV9-120*01	IGKV14-100*01	IGKV9-120*01	IGKV8-30*01	IGKV14-111*01 F	IGKV9-120*01 F	IGKV14-100*01	IGKV9-120*01	IGKV14-100*01	IGKV17-121*01	IGKV14-100*01	IGKV17-121*01	IGKV4-91*01	IGKV14-100*01	IGKV4-70*01	IGKV9-124*01	IGKV9-124*01	IGKV17-121*01
	IGKV9-120*01	IGKV14-100*01	IGKV9-120*01	IGKV14-100*01	IGKV9-120*01	IGKV8-30*01	IGKV14-111*01 F	IGKV9-120*01 F	IGKV14-100*01	IGKV9-120*01	IGKV14-100*01	IGKV17-121*01	IGKV9-120*01	IGKV17-121*01	IGKV4-91*01	IGKV14-100*01	IGKV4-70*01	IGKV9-124*01	IGKV9-124*01	IGKV17-121*01
	IGKV9-120*01	IGKV14-100*01	IGKV9-120*01	IGKV14-100*01	IGKV9-120*01	IGKV8-30*01	IGKV14-111*01 F	IGKV9-120*01 F	IGKV14-100*01	IGKV9-120*01	IGKV9-120*01	IGKV17-121*01	IGKV14-100*01	IGKV17-121*01	IGKV4-91*01	IGKV14-100*01	IGKV4-70*01	IGKV9-124*01	IGKV9-124*01	IGKV17-121*01
	IGKV9-120*01	IGKV14-100*01	IGKV9-120*01	IGKV14-100*01	IGKV9-120*01	IGKV8-30*01	IGKV14-111*01 F	IGKV9-120*01 F	IGKV14-100*01	IGKV9-120*01	IGKV14-100*01	IGKV17-121*01	IGKV14-100*01	IGKV17-121*01	IGKV4-91*01	IGKV14-100*01	IGKV4-70*01	IGKV9-124*01	IGKV9-124*01	IGKV17-121*01
	IGKV9-120*01	IGKV14-100*01	IGKV9-120*01	IGKV14-100*01	IGKV9-120*01	IGKV8-30*01	IGKV14-111*01 F	IGKV9-120*01 F	IGKV14-100*01	IGKV9-120*01	IGKV9-120*01	IGKV17-121*01	IGKV14-100*01	IGKV17-121*01	IGKV4-91*01	IGKV14-100*01	IGKV4-70*01	IGKV9-124*01	IGKV9-124*01	IGKV17-121*01
	IGKV9-120*01	IGKV14-100*01	IGKV9-120*01	IGKV14-100*01	IGKV9-120*01	IGKV8-30*01	IGKV14-111*01 F	IGKV9-120*01 F	IGKV14-100*01	IGKV9-120*01	IGKV14-100*01	IGKV17-121*01	IGKV14-100*01	IGKV17-121*01	IGKV17-121*01	IGKV14-100*01	IGKV4-70*01	IGKV9-124*01	IGKV9-124*01	IGKV17-121*01
	IGKV9-120*01	IGKV14-100*01	IGKV9-120*01	IGKV14-100*01	IGKV9-120*01	IGKV9-120*01	IGKV14-111*01 F	IGKV9-120*01 F	IGKV14-100*01	IGKV9-120*01	IGKV9-120*01	IGKV17-121*01	IGKV14-100*01	IGKV17-121*01	IGKV4-91*01	IGKV14-100*01	IGKV4-70*01	IGKV9-124*01	IGKV9-124*01	IGKV17-121*01
	IGKV9-120*01	IGKV14-100*01	IGKV9-120*01	IGKV14-100*01	IGKV9-120*01	IGKV8-30*01	IGKV14-111*01 F	IGKV14-111*01 F	IGKV14-100*01	IGKV9-120*01	IGKV9-120*01	IGKV17-121*01	IGKV9-120*01	IGKV17-121*01	IGKV17-121*01	IGKV14-100*01	IGKV4-70*01	IGKV9-124*01	IGKV9-124*01	IGKV17-121*01
	IGKV9-120*01	IGKV14-100*01	IGKV9-120*01	IGKV14-100*01	IGKV9-120*01	IGKV8-30*01	IGKV14-111*01 F	IGKV9-120*01 F	IGKV1-135*01	IGKV9-120*01	IGKV14-100*01	IGKV17-121*01	IGKV14-100*01	IGKV17-121*01	IGKV17-121*01	IGKV14-100*01	IGKV4-70*01	IGKV9-124*01	IGKV9-124*01	IGKV17-121*01
	IGKV9-120*01	IGKV14-100*01	IGKV9-120*01	IGKV14-100*01	IGKV9-120*01	IGKV8-30*01	IGKV14-111*01 F	IGKV14-111*01 F	IGKV14-100*01	IGKV9-120*01	IGKV9-120*01	IGKV17-121*01	IGKV14-100*01	IGKV17-121*01	IGKV4-91*01	IGKV14-100*01	IGKV4-70*01	IGKV9-124*01	IGKV9-124*01	IGKV17-121*01
	IGKV9-120*01	IGKV14-100*01	IGKV9-120*01	IGKV14-100*01	IGKV9-120*01	IGKV8-30*01	IGKV14-111*01 F	IGKV9-120*01 F	IGKV14-100*01	IGKV9-120*01	IGKV14-100*01	IGKV17-121*01	IGKV14-100*01	IGKV17-121*01	IGKV17-121*01	IGKV14-100*01	IGKV4-70*01	IGKV9-124*01	IGKV9-124*01	IGKV17-121*01
	IGKV9-120*01	IGKV14-100*01	IGKV9-120*01	IGKV14-100*01	IGKV9-120*01	IGKV9-120*01	IGKV14-111*01 F	IGKV14-111*01 F	IGKV14-100*01	IGKV9-120*01	IGKV14-100*01	IGKV17-121*01	IGKV14-100*01	IGKV17-121*01	IGKV4-91*01	IGKV14-100*01	IGKV4-70*01	IGKV9-124*01	IGKV9-124*01	IGKV17-121*01
	IGKV9-120*01	IGKV14-100*01	IGKV9-120*01	IGKV14-100*01	IGKV9-120*01	IGKV9-120*01	IGKV14-111*01 F		IGKV14-100*01	IGKV9-120*01	IGKV14-100*01	IGKV17-121*01	IGKV9-120*01	IGKV17-121*01	IGKV17-121*01	IGKV14-100*01	IGKV4-70*01	IGKV9-124*01	IGKV9-124*01	IGKV17-121*01
	IGKV9-120*01	IGKV14-100*01	IGKV9-120*01	IGKV14-100*01	IGKV9-120*01	IGKV8-30*01	IGKV14-111*01 F	IGKV9-120*01 F	IGKV14-100*01	IGKV9-120*01	IGKV14-100*01	IGKV17-121*01	IGKV14-100*01	IGKV17-121*01	IGKV4-91*01	IGKV14-100*01	IGKV4-70*01	IGKV9-124*01	IGKV9-124*01	IGKV17-121*01
	IGKV9-120*01	IGKV14-100*01	IGKV9-120*01	IGKV14-100*01	IGKV9-120*01	IGKV9-120*01	IGKV14-111*01 F	IGKV9-120*01 F	IGKV14-100*01	IGKV9-120*01	IGKV14-100*01	IGKV17-121*01	IGKV14-100*01	IGKV17-121*01	IGKV4-91*01	IGKV14-100*01	IGKV4-70*01	IGKV9-124*01	IGKV9-124*01	IGKV17-121*01
	IGKV9-120*01	IGKV14-100*01	IGKV9-120*01	IGKV14-100*01	IGKV9-120*01	IGKV8-30*01	IGKV14-111*01 F	IGKV9-120*01 F	IGKV14-100*01	IGKV9-120*01	IGKV14-100*01	IGKV17-121*01	IGKV14-100*01	IGKV17-121*01	IGKV17-121*01	IGKV14-100*01	IGKV4-70*01	IGKV9-124*01	IGKV9-124*01	IGKV17-121*01
	IGKV9-120*01	IGKV14-100*01	IGKV9-120*01	IGKV14-100*01	IGKV9-120*01	IGKV8-30*01	IGKV14-111*01 F	IGKV9-120*01 F	IGKV14-100*01	IGKV9-120*01	IGKV14-100*01	IGKV17-121*01	IGKV9-120*01	IGKV17-121*01	IGKV17-121*01	IGKV14-100*01	IGKV4-70*01	IGKV9-124*01	IGKV9-124*01	IGKV17-121*01
	IGKV9-120*01	IGKV14-100*01	IGKV9-120*01	IGKV14-100*01	IGKV9-120*01	IGKV8-30*01	IGKV14-111*01 F	IGKV14-111*01 F	IGKV14-100*01	IGKV9-120*01	IGKV9-120*01	IGKV17-121*01	IGKV14-100*01	IGKV17-121*01	IGKV17-121*01	IGKV14-100*01	IGKV4-70*01	IGKV9-124*01	IGKV9-124*01	IGKV17-121*01
	IGKV9-120*01	IGKV14-100*01	IGKV9-120*01	IGKV14-100*01	IGKV9-120*01	IGKV9-120*01	IGKV14-111*01 F	IGKV9-120*01 F	IGKV14-100*01	IGKV9-120*01	IGKV14-100*01	IGKV17-121*01	IGKV14-100*01	IGKV17-121*01	IGKV4-91*01	IGKV14-100*01	IGKV4-70*01	IGKV9-124*01	IGKV9-124*01	IGKV17-121*01
	IGKV9-120*01	IGKV14-100*01	IGKV9-120*01	IGKV14-100*01	IGKV9-120*01	IGKV8-30*01	IGKV14-111*01 F	IGKV9-120*01 F	IGKV14-100*01	IGKV9-120*01	IGKV14-100*01	IGKV17-121*01	IGKV9-120*01	IGKV17-121*01	IGKV4-91*01	IGKV14-100*01	IGKV4-70*01	IGKV9-124*01	IGKV9-124*01	IGKV17-121*01
	IGKV9-120*01	IGKV14-100*01	IGKV9-120*01	IGKV14-100*01	IGKV9-120*01	IGKV8-30*01	IGKV14-111*01 F	IGKV9-120*01 F	IGKV14-100*01	IGKV9-120*01	IGKV9-120*01	IGKV17-121*01	IGKV14-100*01	IGKV17-121*01	IGKV4-91*01	IGKV14-100*01	IGKV4-70*01	IGKV9-124*01	IGKV9-124*01	IGKV17-121*01
	IGKV9-120*01	IGKV14-100*01	IGKV9-120*01	IGKV14-100*01	IGKV9-120*01	IGKV8-30*01	IGKV14-111*01 F	IGKV9-120*01 F	IGKV14-100*01	IGKV9-120*01	IGKV14-100*01	IGKV17-121*01	IGKV14-100*01	IGKV17-121*01	IGKV4-91*01	IGKV14-100*01	IGKV4-70*01	IGKV9-124*01	IGKV9-124*01	IGKV17-121*01
	IGKV9-120*01	IGKV14-100*01	IGKV9-120*01	IGKV14-100*01	IGKV9-120*01	IGKV8-30*01	IGKV14-111*01 F	IGKV9-120*01 F	IGKV14-100*01	IGKV9-120*01	IGKV9-120*01	IGKV17-121*01	IGKV14-100*01	IGKV17-121*01	IGKV4-91*01	IGKV14-100*01	IGKV4-70*01	IGKV9-124*01	IGKV9-124*01	IGKV17-121*01
	IGKV9-120*01	IGKV14-100*01	IGKV9-120*01	IGKV14-100*01	IGKV9-120*01	IGKV8-30*01	IGKV14-111*01 F	IGKV9-120*01 F	IGKV14-100*01	IGKV9-120*01	IGKV14-100*01	IGKV17-121*01	IGKV14-100*01	IGKV17-121*01	IGKV4-91*01	IGKV14-100*01	IGKV4-70*01	IGKV9-124*01	IGKV9-124*01	IGKV17-121*01
	IGKV9-120*01	IGKV14-100*01	IGKV9-120*01	IGKV14-100*01	IGKV9-120*01	IGKV8-30*01	IGKV14-111*01 F	IGKV9-120*01 F	IGKV14-100*01	IGKV9-120*01	IGKV14-100*01	IGKV17-121*01	IGKV14-100*01	IGKV17-121*01	IGKV4-91*01	IGKV14-100*01	IGKV4-70*01	IGKV9-124*01	IGKV9-124*01	IGKV17-121*01
	IGKV9-120*01	IGKV14-100*01	IGKV9-120*01	IGKV14-100*01	IGKV9-120*01	IGKV8-30*01	IGKV14-111*01 F	IGKV14-111*01 F	IGKV14-100*01	IGKV9-120*01	IGKV9-120*01	IGKV17-121*01	IGKV14-100*01	IGKV17-121*01	IGKV17-121*01	IGKV14-100*01	IGKV4-70*01	IGKV9-124*01	IGKV9-124*01	IGKV17-121*01
	IGKV9-120*01	IGKV14-100*01	IGKV9-120*01	IGKV14-100*01	IGKV9-120*01	IGKV8-30*01	IGKV14-111*01 F	IGKV9-120*01 F	IGKV14-100*01	IGKV9-120*01	IGKV9-120*01	IGKV17-121*01	IGKV14-100*01	IGKV17-121*01	IGKV4-91*01	IGKV14-100*01	IGKV4-70*01	IGKV9-124*01	IGKV9-124*01	IGKV17-121*01
	IGKV9-120*01	IGKV14-100*01	IGKV9-120*01	IGKV14-100*01	IGKV9-120*01	IGKV8-30*01	IGKV14-111*01 F	IGKV9-120*01 F	IGKV14-100*01	IGKV9-120*01	IGKV9-120*01	IGKV17-121*01	IGKV14-100*01	IGKV17-121*01	IGKV17-121*01	IGKV14-100*01	IGKV4-70*01	IGKV9-124*01	IGKV9-124*01	IGKV17-121*01
	IGKV9-120*01	IGKV14-100*01	IGKV9-120*01	IGKV14-100*01	IGKV9-120*01	IGKV8-30*01	IGKV14-111*01 F	IGKV9-120*01 F	IGKV14-100*01	IGKV9-120*01	IGKV9-120*01	IGKV17-121*01	IGKV14-100*01	IGKV17-121*01	IGKV4-91*01	IGKV14-100*01	IGKV4-70*01	IGKV9-124*01	IGKV9-124*01	IGKV17-121*01
	IGKV9-120*01	IGKV14-100*01	IGKV9-120*01	IGKV14-100*01	IGKV9-120*01	IGKV9-120*01	IGKV14-111*01 F	IGKV14-111*01 F	IGKV4-59*01	IGKV9-120*01	IGKV14-100*01	IGKV17-121*01	IGKV14-100*01	IGKV17-121*01	IGKV4-91*01	IGKV14-100*01	IGKV4-70*01	IGKV9-124*01	IGKV9-124*01	IGKV17-121*01
	IGKV9-120*01	IGKV14-100*01	IGKV9-120*01	IGKV14-100*01	IGKV9-120*01	IGKV8-30*01	IGKV14-111*01 F	IGKV14-111*01 F	IGKV14-100*01	IGKV9-120*01	IGKV14-100*01	IGKV17-121*01	IGKV14-100*01	IGKV17-121*01	IGKV17-121*01	IGKV14-100*01	IGKV4-70*01	IGKV9-124*01	IGKV9-124*01	IGKV17-121*01
	IGKV9-120*01	IGKV14-100*01	IGKV9-120*01	IGKV14-100*01	IGKV9-120*01	IGKV8-30*01	IGKV14-111*01 F	IGKV14-111*01 F	IGKV14-100*01	IGKV9-120*01	IGKV9-120*01	IGKV17-121*01	IGKV14-100*01	IGKV17-121*01	IGKV4-91*01	IGKV14-100*01	IGKV4-70*01	IGKV9-124*01	IGKV9-124*01	IGKV17-121*01
	IGKV9-120*01	IGKV14-100*01	IGKV9-120*01	IGKV14-100*01	IGKV9-120*01	IGKV9-120*01	IGKV14-111*01 F	IGKV9-120*01 F	IGKV14-100*01	IGKV9-120*01	IGKV14-100*01	IGKV17-121*01	IGKV14-100*01	IGKV17-121*01	IGKV17-121*01	IGKV14-100*01	IGKV4-70*01	IGKV9-124*01	IGKV9-124*01	IGKV17-121*01
	IGKV9-120*01	IGKV14-100*01	IGKV9-120*01	IGKV14-100*01	IGKV9-120*01	IGKV8-30*01	IGKV14-111*01 F	IGKV9-120*01 F	IGKV14-100*01	IGKV9-120*01	IGKV14-100*01	IGKV17-121*01	IGKV14-100*01	IGKV17-121*01	IGKV4-91*01	IGKV14-100*01	IGKV4-70*01	IGKV9-124*01	IGKV9-124*01	IGKV17-121*01
	IGKV9-120*01	IGKV14-100*01	IGKV9-120*01	IGKV14-100*01	IGKV9-120*01	IGKV9-120*01	IGKV14-111*01 F	IGKV9-120*01 F	IGKV14-100*01	IGKV9-120*01	IGKV9-120*01	IGKV17-121*01	IGKV14-100*01	IGKV17-121*01	IGKV4-91*01	IGKV14-100*01	IGKV4-70*01	IGKV9-124*01	IGKV9-124*01	IGKV17-121*01
	IGKV9-120*01	IGKV14-100*01	IGKV9-120*01	IGKV14-100*01	IGKV9-120*01	IGKV8-30*01	IGKV14-111*01 F	IGKV9-120*01 F	IGKV14-100*01	IGKV9-120*01	IGKV14-100*01	IGKV17-121*01	IGKV14-100*01	IGKV17-121*01	IGKV4-91*01	IGKV14-100*01	IGKV4-70*01	IGKV9-124*01	IGKV9-124*01	IGKV17-121*01
	IGKV9-120*01	IGKV14-100*01	IGKV9-120*01	IGKV14-100*01	IGKV9-120*01	IGKV8-30*01	IGKV14-111*01 F	IGKV14-111*01 F	IGKV14-100*01	IGKV9-120*01	IGKV9-120*01	IGKV17-121*01	IGKV14-100*01	IGKV17-121*01	IGKV4-91*01	IGKV14-100*01	IGKV4-70*01	IGKV9-124*01	IGKV9-124*01	IGKV17-121*01
	IGKV9-120*01	IGKV14-100*01	IGKV9-120*01	IGKV14-100*01	IGKV9-120*01	IGKV8-30*01	IGKV14-111*01 F	IGKV14-111*01 F	IGKV14-100*01	IGKV9-120*01	IGKV14-100*01	IGKV17-121*01	IGKV14-100*01	IGKV17-121*01	IGKV17-121*01	IGKV14-100*01	IGKV4-70*01	IGKV9-124*01	IGKV9-124*01	IGKV17-121*01
	IGKV9-120*01	IGKV14-100*01	IGKV9-120*01	IGKV14-100*01	IGKV9-120*01	IGKV8-30*01	IGKV14-111*01 F	IGKV14-111*01 F	IGKV1-135*01	IGKV9-120*01	IGKV9-120*01	IGKV17-121*01	IGKV14-100*01	IGKV17-121*01	IGKV4-91*01	IGKV14-100*01	IGKV4-70*01	IGKV9-124*01	IGKV9-124*01	IGKV17-121*01
	IGKV9-120*01	IGKV14-100*01	IGKV9-120*01	IGKV14-100*01	IGKV9-120*01	IGKV8-30*01	IGKV14-111*01 F	IGKV1-135*01 F	IGKV14-100*01	IGKV9-120*01	IGKV14-100*01	IGKV17-121*01	IGKV14-100*01	IGKV17-121*01	IGKV17-121*01	IGKV14-100*01	IGKV4-70*01	IGKV9-124*01	IGKV9-124*01	IGKV17-121*01
	IGKV9-120*01	IGKV14-100*01	IGKV9-120*01	IGKV14-100*01	IGKV9-120*01	IGKV8-30*01	IGKV14-111*01 F	IGKV9-120*01 F	IGKV14-100*01	IGKV9-120*01	IGKV9-120*01	IGKV17-121*01	IGKV9-120*01	IGKV17-121*01	IGKV17-121*01	IGKV14-100*01	IGKV4-70*01	IGKV9-124*01	IGKV9-124*01	IGKV17-121*01
	IGKV9-120*01	IGKV14-100*01	IGKV9-120*01	IGKV14-100*01	IGKV9-120*01	IGKV9-120*01	IGKV14-111*01 F	IGKV9-120*01 F	IGKV14-100*01	IGKV9-120*01	IGKV9-120*01	IGKV17-121*01	IGKV9-120*01	IGKV17-121*01	IGKV4-91*01	IGKV14-100*01	IGKV4-70*01	IGKV9-124*01	IGKV9-124*01	IGKV17-121*01
	IGKV9-120*01	IGKV14-100*01	IGKV9-120*01	IGKV14-100*01	IGKV9-120*01	IGKV8-30*01	IGKV14-111*01 F	IGKV9-120*01 F	IGKV14-100*01	IGKV9-120*01	IGKV14-100*01	IGKV17-121*01	IGKV9-120*01	IGKV17-121*01	IGKV17-121*01	IGKV14-100*01	IGKV4-70*01	IGKV9-124*01	IGKV9-124*01	IGKV4-68*01
	IGKV9-120*01	IGKV14-100*01	IGKV9-120*01	IGKV14-100*01	IGKV9-120*01	IGKV8-30*01	IGKV14-111*01 F	IGKV1-135*01 F	IGKV14-100*01	IGKV9-120*01	IGKV14-100*01	IGKV17-121*01	IGKV14-100*01	IGKV17-121*01	IGKV4-91*01	IGKV14-100*01	IGKV4-70*01	IGKV9-124*01	IGKV9-124*01	IGKV17-121*01
	IGKV9-120*01	IGKV14-100*01	IGKV9-120*01	IGKV14-100*01	IGKV9-120*01	IGKV8-30*01	IGKV14-111*01 F	IGKV9-120*01 F	IGKV14-100*01	IGKV9-120*01	IGKV9-120*01	IGKV17-121*01	IGKV14-100*01	IGKV17-121*01	IGKV17-121*01	IGKV14-100*01	IGKV4-70*01	IGKV9-124*01	IGKV9-124*01	IGKV17-121*01
	IGKV9-120*01	IGKV14-100*01	IGKV9-120*01	IGKV14-100*01	IGKV9-120*01	IGKV8-30*01	IGKV14-111*01 F	IGKV1-135*01 F	IGKV14-100*01	IGKV9-120*01	IGKV9-120*01	IGKV17-121*01	IGKV14-100*01	IGKV17-121*01	IGKV4-91*01	IGKV14-100*01	IGKV4-70*01	IGKV9-124*01	IGKV9-124*01	IGKV17-121*01
	IGKV9-120*01	IGKV14-100*01	IGKV9-120*01	IGKV14-100*01	IGKV9-120*01	IGKV8-30*01	IGKV14-111*01 F	IGKV9-120*01 F	IGKV14-100*01	IGKV9-120*01	IGKV9-120*01	IGKV17-121*01	IGKV14-100*01	IGKV17-121*01	IGKV4-91*01	IGKV14-100*01	IGKV4-70*01	IGKV9-124*01	IGKV9-124*01	IGKV17-121*01
	IGKV9-120*01	IGKV14-100*01	IGKV9-120*01	IGKV14-100*01	IGKV9-120*01	IGKV8-30*01	IGKV14-111*01 F	IGKV1-135*01 F	IGKV14-100*01	IGKV9-120*01	IGKV9-120*01	IGKV17-121*01	IGKV14-100*01	IGKV17-121*01	IGKV17-121*01	IGKV14-100*01	IGKV4-70*01	IGKV9-124*01	IGKV9-124*01	IGKV17-121*01
	IGKV9-120*01	IGKV14-100*01	IGKV9-120*01	IGKV14-100*01	IGKV9-120*01	IGKV8-30*01	IGKV14-111*01 F	IGKV9-120*01 F	IGKV14-100*01	IGKV9-120*01	IGKV9-120*01	IGKV17-121*01	IGKV14-100*01	IGKV17-121*01	IGKV4-91*01	IGKV14-100*01	IGKV4-70*01	IGKV9-124*01	IGKV9-124*01	IGKV17-121*01
	IGKV9-120*01	IGKV14-100*01	IGKV9-120*01	IGKV14-100*01	IGKV9-120*01	IGKV9-120*01	IGKV14-111*01 F	IGKV9-120*01 F	IGKV14-100*01	IGKV9-120*01	IGKV14-100*01	IGKV17-121*01	IGKV14-100*01	IGKV17-121*01	IGKV4-91*01	IGKV14-100*01	IGKV4-70*01	IGKV9-124*01	IGKV9-124*01	IGKV17-121*01
	IGKV9-120*01	IGKV14-100*01	IGKV9-120*01	IGKV14-100*01	IGKV9-120*01	IGKV8-30*01	IGKV14-111*01 F	IGKV9-120*01 F	IGKV14-100*01	IGKV9-120*01	IGKV14-100*01	IGKV17-121*01	IGKV14-100*01	IGKV17-121*01	IGKV4-91*01	IGKV14-100*01	IGKV4-70*01	IGKV9-124*01	IGKV9-124*01	IGKV17-121*01
	IGKV9-120*01	IGKV14-100*01	IGKV9-120*01	IGKV14-100*01	IGKV9-120*01	IGKV9-120*01	IGKV14-111*01 F	IGKV9-120*01 F	IGKV14-100*01	IGKV9-120*01	IGKV9-120*01	IGKV17-121*01	IGKV14-100*01	IGKV17-121*01	IGKV17-121*01	IGKV14-100*01	IGKV4-70*01	IGKV9-124*01	IGKV9-124*01	IGKV17-121*01
	IGKV9-120*01	IGKV14-100*01	IGKV9-120*01	IGKV14-100*01	IGKV9-120*01	IGKV8-30*01	IGKV14-111*01 F	IGKV14-111*01 F	IGKV14-100*01	IGKV9-120*01	IGKV14-100*01	IGKV17-121*01	IGKV14-100*01	IGKV17-121*01	IGKV4-91*01	IGKV14-100*01	IGKV4-70*01	IGKV9-124*01	IGKV9-124*01	IGKV17-121*01
	IGKV9-120*01	IGKV14-100*01	IGKV9-120*01	IGKV14-100*01	IGKV9-120*01	IGKV9-120*01	IGKV14-111*01 F	IGKV14-111*01 F	IGKV14-100*01	IGKV9-120*01	IGKV14-100*01	IGKV17-121*01	IGKV9-120*01	IGKV17-121*01	IGKV17-121*01	IGKV14-100*01	IGKV4-70*01	IGKV9-124*01	IGKV9-124*01	IGKV17-121*01
	IGKV9-120*01	IGKV14-100*01	IGKV9-120*01	IGKV14-100*01	IGKV9-120*01	IGKV8-30*01	IGKV14-111*01 F	IGKV9-120*01 F	IGKV14-100*01	IGKV9-120*01	IGKV14-100*01	IGKV17-121*01	IGKV9-120*01	IGKV17-121*01	IGKV4-91*01	IGKV14-100*01	IGKV4-70*01	IGKV9-124*01	IGKV9-124*01	IGKV17-121*01
	IGKV9-120*01	IGKV14-100*01	IGKV9-120*01	IGKV14-100*01	IGKV9-120*01	IGKV9-120*01	IGKV14-111*01 F	IGKV14-111*01 F	IGKV14-100*01	IGKV9-120*01	IGKV9-120*01	IGKV17-121*01	IGKV14-100*01	IGKV17-121*01	IGKV17-121*01	IGKV14-100*01	IGKV4-70*01	IGKV9-124*01	IGKV9-124*01	IGKV17-121*01
	IGKV9-120*01	IGKV14-100*01	IGKV9-120*01	IGKV14-100*01	IGKV9-120*01	IGKV9-120*01	IGKV14-111*01 F	IGKV9-120*01 F	IGKV14-100*01	IGKV9-120*01	IGKV14-100*01	IGKV17-121*01	IGKV14-100*01	IGKV17-121*01	IGKV4-91*01	IGKV14-100*01	IGKV4-70*01	IGKV9-124*01	IGKV9-124*01	IGKV17-121*01
	IGKV9-120*01	IGKV14-100*01	IGKV9-120*01	IGKV14-100*01	IGKV9-120*01	IGKV8-30*01	IGKV14-111*01 F	IGKV14-111*01 F	IGKV14-100*01	IGKV9-120*01	IGKV14-100*01	IGKV17-121*01	IGKV14-100*01	IGKV17-121*01	IGKV17-121*01	IGKV14-100*01	IGKV4-70*01	IGKV9-124*01	IGKV9-124*01	IGKV17-121*01
	IGKV9-120*01	IGKV14-100*01	IGKV9-120*01	IGKV14-100*01	IGKV9-120*01	IGKV8-30*01	IGKV14-111*01 F	IGKV9-120*01 F	IGKV14-100*01	IGKV9-120*01	IGKV14-100*01	IGKV17-121*01	IGKV14-100*01	IGKV17-121*01	IGKV4-91*01	IGKV14-100*01	IGKV4-70*01	IGKV9-124*01	IGKV9-124*01	IGKV17-121*01
	IGKV9-120*01	IGKV14-100*01	IGKV9-120*01	IGKV14-100*01	IGKV9-120*01	IGKV8-30*01	IGKV14-111*01 F	IGKV9-120*01 F	IGKV17-121*01	IGKV9-120*01	IGKV14-100*01	IGKV17-121*01	IGKV9-120*01	IGKV17-121*01	IGKV4-91*01	IGKV14-100*01	IGKV4-70*01	IGKV9-124*01	IGKV9-124*01	IGKV17-121*01
	IGKV9-120*01	IGKV14-100*01	IGKV9-120*01	IGKV14-100*01	IGKV9-120*01	IGKV8-30*01	IGKV14-111*01 F	IGKV9-120*01 F	IGKV14-100*01	IGKV9-120*01	IGKV9-120*01	IGKV17-121*01	IGKV14-100*01	IGKV17-121*01	IGKV4-91*01	IGKV14-100*01	IGKV4-70*01	IGKV9-124*01	IGKV9-124*01	IGKV17-121*01
	IGKV9-120*01	IGKV14-100*01	IGKV9-120*01	IGKV14-100*01	IGKV9-120*01	IGKV8-30*01	IGKV14-111*01 F	IGKV9-120*01 F	IGKV14-100*01	IGKV9-120*01	IGKV14-100*01	IGKV17-121*01	IGKV14-100*01	IGKV17-121*01	IGKV4-91*01	IGKV14-100*01	IGKV4-70*01	IGKV9-124*01	IGKV9-124*01	IGKV17-121*01
	IGKV9-120*01	IGKV14-100*01	IGKV9-120*01	IGKV14-100*01	IGKV9-120*01	IGKV9-120*01	IGKV14-111*01 F	IGKV9-120*01 F	IGKV14-100*01	IGKV9-120*01	IGKV9-120*01	IGKV17-121*01	IGKV9-120*01	IGKV17-121*01	IGKV17-121*01	IGKV14-100*01	IGKV4-70*01	IGKV9-124*01	IGKV9-124*01	IGKV17-121*01
	IGKV9-120*01	IGKV14-100*01	IGKV9-120*01	IGKV14-100*01	IGKV9-120*01	IGKV8-30*01	IGKV14-111*01 F	IGKV9-120*01 F	IGKV14-100*01	IGKV9-120*01	IGKV14-100*01	IGKV17-121*01	IGKV9-120*01	IGKV17-121*01	IGKV4-91*01	IGKV14-100*01	IGKV4-70*01	IGKV9-124*01	IGKV9-124*01	IGKV17-121*01
	IGKV9-120*01	IGKV14-100*01	IGKV9-120*01	IGKV14-100*01	IGKV9-120*01	IGKV8-30*01	IGKV14-111*01 F	IGKV9-120*01 F	IGKV14-100*01	IGKV9-120*01	IGKV9-120*01	IGKV17-121*01	IGKV14-100*01	IGKV17-121*01	IGKV4-91*01	IGKV14-100*01	IGKV4-70*01	IGKV9-124*01	IGKV9-124*01	IGKV17-121*01
	IGKV9-120*01	IGKV14-100*01	IGKV9-120*01	IGKV14-100*01	IGKV9-120*01	IGKV8-30*01	IGKV14-111*01 F	IGKV9-120*01 F	IGKV14-100*01	IGKV9-120*01	IGKV14-100*01	IGKV17-121*01	IGKV14-100*01	IGKV17-121*01	IGKV4-91*01	IGKV14-100*01	IGKV4-70*01	IGKV9-124*01	IGKV9-124*01	IGKV17-121*01
	IGKV9-120*01	IGKV14-100*01	IGKV9-120*01	IGKV14-100*01	IGKV9-120*01	IGKV9-120*01	IGKV14-111*01 F	IGKV9-120*01 F	IGKV14-100*01	IGKV9-120*01	IGKV14-100*01	IGKV17-121*01	IGKV14-100*01	IGKV17-121*01	IGKV4-91*01	IGKV14-100*01	IGKV4-70*01	IGKV9-124*01	IGKV9-124*01	IGKV17-121*01
	IGKV9-120*01	IGKV14-100*01	IGKV9-120*01	IGKV14-100*01	IGKV9-120*01	IGKV8-30*01	IGKV14-111*01 F	IGKV14-111*01 F	IGKV14-100*01	IGKV9-120*01	IGKV9-120*01	IGKV17-121*01	IGKV14-100*01	IGKV17-121*01	IGKV17-121*01	IGKV14-100*01	IGKV4-70*01	IGKV9-124*01	IGKV9-124*01	IGKV17-121*01
	IGKV9-120*01	IGKV14-100*01	IGKV9-120*01	IGKV14-100*01	IGKV9-120*01	IGKV8-30*01	IGKV14-111*01 F	IGKV9-120*01 F	IGKV14-100*01	IGKV9-120*01	IGKV9-120*01	IGKV17-121*01	IGKV14-100*01	IGKV17-121*01	IGKV4-91*01	IGKV14-100*01	IGKV4-70*01	IGKV9-124*01	IGKV9-124*01	IGKV17-121*01
	IGKV9-120*01	IGKV14-100*01	IGKV9-120*01	IGKV14-100*01	IGKV9-120*01	IGKV8-30*01	IGKV14-111*01 F	IGKV14-111*01 F	IGKV14-100*01	IGKV9-120*01	IGKV9-120*01	IGKV17-121*01	IGKV14-100*01	IGKV17-121*01	IGKV17-121*01	IGKV14-100*01	IGKV4-70*01	IGKV9-124*01	IGKV9-124*01	IGKV17-121*01
	IGKV9-120*01	IGKV14-100*01	IGKV9-120*01	IGKV14-100*01	IGKV9-120*01	IGKV9-120*01	IGKV14-111*01 F	IGKV14-111*01 F	IGKV14-100*01	IGKV9-120*01	IGKV14-100*01	IGKV17-121*01	IGKV9-120*01	IGKV17-121*01	IGKV4-91*01	IGKV14-100*01	IGKV4-70*01	IGKV9-124*01	IGKV9-124*01	IGKV17-121*01
	IGKV9-120*01	IGKV14-100*01	IGKV9-120*01	IGKV14-100*01	IGKV9-120*01	IGKV8-30*01	IGKV14-111*01 F	IGKV14-111*01 F	IGKV14-100*01	IGKV9-120*01	IGKV14-100*01	IGKV17-121*01	IGKV9-120*01	IGKV17-121*01	IGKV17-121*01	IGKV14-100*01	IGKV4-70*01	IGKV9-124*01	IGKV9-124*01	IGKV4-68*01
	IGKV9-120*01	IGKV14-100*01	IGKV9-120*01	IGKV14-100*01	IGKV9-120*01	IGKV8-30*01	IGKV14-111*01 F	IGKV9-120*01 F	IGKV14-100*01	IGKV9-120*01	IGKV14-100*01	IGKV17-121*01	IGKV9-120*01	IGKV17-121*01	IGKV4-91*01	IGKV14-100*01	IGKV4-70*01	IGKV9-124*01	IGKV9-124*01	IGKV17-121*01
	IGKV9-120*01	IGKV14-100*01	IGKV9-120*01	IGKV14-100*01	IGKV9-120*01	IGKV8-30*01	IGKV14-111*01 F	IGKV9-120*01 F	IGKV14-100*01	IGKV9-120*01	IGKV14-100*01	IGKV17-121*01	IGKV14-100*01	IGKV17-121*01	IGKV4-91*01	IGKV14-100*01	IGKV4-70*01	IGKV9-124*01	IGKV9-124*01	IGKV17-121*01
	IGKV9-120*01	IGKV14-100*01	IGKV9-120*01	IGKV14-100*01	IGKV9-120*01	IGKV8-30*01	IGKV14-111*01 F	IGKV9-120*01 F	IGKV14-100*01	IGKV9-120*01	IGKV14-100*01	IGKV17-121*01	IGKV14-100*01	IGKV17-121*01	IGKV17-121*01	IGKV14-100*01	IGKV4-70*01	IGKV9-124*01	IGKV9-124*01	IGKV17-121*01
	IGKV9-120*01	IGKV14-100*01	IGKV9-120*01	IGKV14-100*01	IGKV9-120*01	IGKV8-30*01	IGKV14-111*01 F	IGKV14-111*01 F	IGKV14-100*01	IGKV9-120*01	IGKV9-120*01	IGKV17-121*01	IGKV14-100*01	IGKV17-121*01	IGKV4-91*01	IGKV14-100*01	IGKV4-70*01	IGKV9-124*01	IGKV9-124*01	IGKV17-121*01
	IGKV9-120*01	IGKV14-100*01	IGKV9-120*01	IGKV14-100*01	IGKV9-120*01	IGKV8-30*01	IGKV14-111*01 F	IGKV14-111*01 F	IGKV14-100*01	IGKV9-120*01	IGKV14-100*01	IGKV17-121*01	IGKV14-100*01	IGKV17-121*01	IGKV17-121*01	IGKV14-100*01	IGKV4-70*01	IGKV9-124*01	IGKV9-124*01	IGKV17-121*01
	IGKV9-120*01	IGKV14-100*01	IGKV9-120*01	IGKV14-100*01	IGKV9-120*01	IGKV9-120*01	IGKV14-111*01 F	IGKV14-111*01 F	IGKV14-100*01	IGKV9-120*01	IGKV14-100*01	IGKV17-121*01	IGKV14-100*01	IGKV17-121*01	IGKV4-91*01	IGKV14-100*01	IGKV4-70*01	IGKV9-124*01	IGKV9-124*01	IGKV17-121*01
	IGKV9-120*01	IGKV14-100*01	IGKV9-120*01	IGKV14-100*01	IGKV9-120*01	IGKV9-120*01	IGKV14-111*01 F	IGKV1-135*01 F	IGKV14-100*01	IGKV9-120*01	IGKV14-100*01	IGKV17-121*01	IGKV14-100*01	IGKV17-121*01	IGKV4-91*01	IGKV14-100*01	IGKV4-70*01	IGKV9-124*01	IGKV9-124*01	IGKV4-68*01
	IGKV9-120*01	IGKV14-100*01	IGKV9-120*01	IGKV14-100*01	IGKV9-120*01	IGKV9-120*01	IGKV14-111*01 F	IGKV9-120*01 F	IGKV14-100*01	IGKV1-135*01	IGKV14-100*01	IGKV17-121*01	IGKV9-120*01	IGKV17-121*01	IGKV17-121*01	IGKV14-100*01	IGKV4-70*01	IGKV9-124*01	IGKV9-124*01	IGKV17-121*01
	IGKV9-120*01	IGKV14-100*01	IGKV9-120*01	IGKV14-100*01	IGKV9-120*01	IGKV8-30*01	IGKV14-111*01 F	IGKV9-120*01 F	IGKV4-59*01	IGKV9-120*01	IGKV9-120*01	IGKV17-121*01	IGKV14-100*01	IGKV17-121*01	IGKV4-91*01	IGKV14-100*01	IGKV4-70*01	IGKV9-124*01	IGKV9-124*01	IGKV17-121*01
	IGKV9-120*01	IGKV14-100*01	IGKV9-120*01	IGKV14-100*01	IGKV9-120*01	IGKV8-30*01	IGKV14-111*01 F	IGKV9-120*01 F	IGKV14-100*01	IGKV9-120*01	IGKV9-120*01	IGKV17-121*01	IGKV14-100*01	IGKV17-121*01	IGKV17-121*01	IGKV14-100*01	IGKV4-70*01	IGKV9-124*01	IGKV9-124*01	IGKV17-121*01
	IGKV9-120*01	IGKV14-100*01	IGKV9-120*01	IGKV14-100*01	IGKV9-120*01	IGKV8-30*01	IGKV14-111*01 F	IGKV9-120*01 F	IGKV14-100*01	IGKV9-120*01	IGKV14-100*01	IGKV17-121*01	IGKV14-100*01	IGKV17-121*01	IGKV17-121*01	IGKV14-100*01	IGKV4-70*01	IGKV9-124*01	IGKV9-124*01	IGKV17-121*01
	IGKV9-120*01	IGKV14-100*01	IGKV9-120*01	IGKV14-100*01	IGKV9-120*01	IGKV9-120*01	IGKV14-111*01 F	IGKV9-120*01 F	IGKV14-100*01	IGKV9-120*01	IGKV9-120*01	IGKV17-121*01	IGKV14-100*01	IGKV17-121*01	IGKV4-91*01	IGKV14-100*01	IGKV4-70*01	IGKV9-124*01	IGKV9-124*01	IGKV17-121*01
	IGKV9-120*01	IGKV14-100*01	IGKV9-120*01	IGKV14-100*01	IGKV9-120*01	IGKV8-30*01	IGKV14-111*01 F	IGKV9-120*01 F	IGKV14-100*01	IGKV9-120*01	IGKV9-120*01	IGKV17-121*01	IGKV14-100*01	IGKV17-121*01	IGKV4-91*01	IGKV14-100*01	IGKV4-70*01	IGKV9-124*01	IGKV9-124*01	IGKV17-121*01
	IGKV9-120*01	IGKV14-100*01	IGKV9-120*01	IGKV14-100*01	IGKV9-120*01	IGKV8-30*01	IGKV14-111*01 F	IGKV9-120*01 F	IGKV14-100*01	IGKV9-120*01	IGKV9-120*01	IGKV17-121*01	IGKV14-100*01	IGKV17-121*01	IGKV4-91*01	IGKV14-100*01	IGKV4-70*01	IGKV9-124*01	IGKV9-124*01	IGKV17-121*01
	IGKV9-120*01	IGKV14-100*01	IGKV9-120*01	IGKV14-100*01	IGKV9-120*01	IGKV8-30*01	IGKV14-111*01 F	IGKV14-111*01 F	IGKV14-100*01	IGKV9-120*01	IGKV9-120*01	IGKV17-121*01	IGKV14-100*01	IGKV17-121*01	IGKV4-91*01	IGKV14-100*01	IGKV4-70*01	IGKV9-124*01	IGKV9-124*01	IGKV17-121*01
	IGKV9-120*01	IGKV14-100*01	IGKV9-120*01	IGKV14-100*01	IGKV9-120*01	IGKV8-30*01	IGKV14-111*01 F	IGKV14-111*01 F	IGKV14-100*01	IGKV9-120*01	IGKV9-120*01	IGKV17-121*01	IGKV9-120*01	IGKV17-121*01	IGKV4-91*01	IGKV14-100*01	IGKV4-70*01	IGKV9-124*01	IGKV9-124*01	IGKV17-121*01
	IGKV9-120*01	IGKV14-100*01	IGKV9-120*01	IGKV14-100*01	IGKV9-120*01	IGKV8-30*01	IGKV14-111*01 F	IGKV14-111*01 F	IGKV14-100*01	IGKV9-120*01	IGKV14-100*01	IGKV17-121*01	IGKV14-100*01	IGKV17-121*01	IGKV17-121*01	IGKV14-100*01	IGKV4-70*01	IGKV9-124*01	IGKV9-124*01	IGKV17-121*01
	IGKV9-120*01	IGKV14-100*01	IGKV9-120*01	IGKV14-100*01	IGKV9-120*01	IGKV8-30*01	IGKV14-111*01 F	IGKV4-59*01 F	IGKV14-100*01	IGKV9-120*01	IGKV9-120*01	IGKV17-121*01	IGKV14-100*01	IGKV17-121*01	IGKV4-91*01	IGKV14-100*01	IGKV4-70*01	IGKV9-124*01	IGKV9-124*01	IGKV17-121*01
	IGKV9-120*01	IGKV14-100*01	IGKV9-120*01	IGKV14-100*01	IGKV9-120*01	IGKV8-30*01	IGKV14-111*01 F	IGKV9-120*01 F	IGKV14-100*01	IGKV9-120*01	IGKV14-100*01	IGKV17-121*01	IGKV9-120*01	IGKV17-121*01	IGKV17-121*01	IGKV14-100*01	IGKV4-70*01	IGKV9-124*01	IGKV9-124*01	IGKV17-121*01
	IGKV9-120*01	IGKV14-100*01	IGKV9-120*01	IGKV14-100*01	IGKV9-120*01	IGKV8-30*01	IGKV14-111*01 F	IGKV9-120*01 F	IGKV14-100*01	IGKV9-120*01	IGKV14-100*01	IGKV17-121*01	IGKV14-100*01	IGKV17-121*01	IGKV4-91*01	IGKV14-100*01	IGKV4-70*01	IGKV9-124*01	IGKV9-124*01	IGKV17-121*01
	IGKV9-120*01	IGKV14-100*01	IGKV9-120*01	IGKV14-100*01	IGKV9-120*01	IGKV8-30*01	IGKV14-111*01 F	IGKV14-111*01 F	IGKV14-100*01	IGKV9-120*01	IGKV14-100*01	IGKV17-121*01	IGKV14-100*01	IGKV17-121*01	IGKV4-91*01	IGKV14-100*01	IGKV4-70*01	IGKV9-124*01	IGKV9-124*01	IGKV17-121*01
	IGKV9-120*01	IGKV14-100*01	IGKV9-120*01	IGKV14-100*01	IGKV9-120*01	IGKV8-30*01	IGKV14-111*01 F	IGKV9-120*01 F	IGKV14-100*01	IGKV9-120*01	IGKV14-100*01	IGKV17-121*01	IGKV9-120*01	IGKV17-121*01	IGKV4-91*01	IGKV14-100*01	IGKV4-70*01	IGKV9-124*01	IGKV9-124*01	IGKV17-121*01
	IGKV9-120*01	IGKV14-100*01	IGKV9-120*01	IGKV14-100*01	IGKV9-120*01	IGKV8-30*01	IGKV14-111*01 F	IGKV3-4*01 F	IGKV14-100*01	IGKV9-120*01	IGKV14-100*01	IGKV17-121*01	IGKV14-100*01	IGKV17-121*01	IGKV17-121*01	IGKV14-100*01	IGKV4-70*01	IGKV9-124*01	IGKV9-124*01	IGKV17-121*01
	IGKV9-120*01	IGKV14-100*01	IGKV9-120*01	IGKV14-100*01	IGKV9-120*01	IGKV8-30*01	IGKV14-111*01 F	IGKV1-135*01 F	IGKV1-135*01	IGKV9-120*01	IGKV14-100*01	IGKV17-121*01	IGKV14-100*01	IGKV17-121*01	IGKV4-91*01	IGKV14-100*01	IGKV4-70*01	IGKV9-124*01	IGKV9-124*01	IGKV17-121*01
	IGKV9-120*01	IGKV14-100*01	IGKV9-120*01	IGKV14-100*01	IGKV9-120*01	IGKV8-30*01	IGKV14-111*01 F	IGKV9-120*01 F	IGKV14-100*01	IGKV9-120*01	IGKV9-120*01	IGKV17-121*01	IGKV14-100*01	IGKV17-121*01	IGKV17-121*01	IGKV14-100*01	IGKV4-70*01	IGKV9-124*01	IGKV9-124*01	IGKV17-121*01
	IGKV9-120*01	IGKV14-100*01	IGKV9-120*01	IGKV14-100*01	IGKV9-120*01	IGKV8-30*01	IGKV14-111*01 F	IGKV9-120*01 F	IGKV14-100*01	IGKV9-120*01	IGKV9-120*01	IGKV17-121*01	IGKV14-100*01	IGKV17-121*01	IGKV4-91*01	IGKV14-100*01	IGKV4-70*01	IGKV9-124*01	IGKV9-124*01	IGKV17-121*01
	IGKV9-120*01	IGKV14-100*01	IGKV9-120*01	IGKV14-100*01	IGKV9-120*01	IGKV8-30*01	IGKV14-111*01 F	IGKV9-120*01 F	IGKV14-100*01	IGKV9-120*01	IGKV14-100*01	IGKV17-121*01	IGKV14-100*01	IGKV17-121*01	IGKV17-121*01	IGKV14-100*01	IGKV4-70*01	IGKV9-124*01	IGKV9-124*01	IGKV17-121*01
	IGKV9-120*01	IGKV14-100*01	IGKV9-120*01	IGKV14-100*01	IGKV9-120*01	IGKV8-30*01	IGKV14-111*01 F	IGKV9-120*01 F	IGKV14-100*01	IGKV9-120*01	IGKV14-100*01	IGKV17-121*01	IGKV14-100*01	IGKV17-121*01	IGKV17-121*01	IGKV14-100*01	IGKV4-70*01	IGKV9-124*01	IGKV9-124*01	IGKV17-121*01
	IGKV9-120*01	IGKV14-100*01	IGKV9-120*01	IGKV14-100*01	IGKV9-120*01	IGKV8-30*01	IGKV14-111*01 F	IGKV9-120*01 F	IGKV14-100*01	IGKV9-120*01	IGKV14-100*01	IGKV17-121*01	IGKV14-100*01	IGKV17-121*01	IGKV4-91*01	IGKV14-100*01	IGKV4-70*01	IGKV9-124*01	IGKV9-124*01	IGKV17-121*01
	IGKV9-120*01	IGKV14-100*01	IGKV9-120*01	IGKV14-100*01	IGKV9-120*01	IGKV8-30*01	IGKV16-104*01 F	IGKV9-120*01 F	IGKV14-100*01	IGKV9-120*01	IGKV14-100*01	IGKV17-121*01	IGKV14-100*01	IGKV17-121*01	IGKV4-91*01	IGKV14-100*01	IGKV4-70*01	IGKV9-124*01	IGKV9-124*01	IGKV17-121*01
	IGKV9-120*01	IGKV14-100*01	IGKV9-120*01	IGKV14-100*01	IGKV9-120*01	IGKV9-120*01	IGKV16-104*01 F	IGKV9-120*01 F	IGKV14-100*01	IGKV9-120*01	IGKV14-100*01	IGKV17-121*01	IGKV14-100*01	IGKV17-121*01	IGKV4-91*01	IGKV14-100*01	IGKV4-70*01	IGKV9-124*01	IGKV9-124*01	IGKV17-121*01
	IGKV9-120*01	IGKV14-100*01	IGKV9-120*01	IGKV14-100*01	IGKV9-120*01	IGKV8-30*01	IGKV17-121*01 F	IGKV9-120*01 F	IGKV14-100*01	IGKV9-120*01	IGKV9-120*01	IGKV17-121*01	IGKV14-100*01	IGKV17-121*01	IGKV17-121*01	IGKV14-100*01	IGKV4-70*01	IGKV9-124*01	IGKV9-124*01	IGKV17-121*01
	IGKV9-120*01	IGKV14-100*01	IGKV9-120*01	IGKV14-100*01	IGKV9-120*01	IGKV8-30*01	IGKV17-121*01 F	IGKV9-120*01 F	IGKV14-100*01	IGKV9-120*01	IGKV14-100*01	IGKV17-121*01	IGKV14-100*01	IGKV17-121*01	IGKV17-121*01	IGKV14-100*01	IGKV4-70*01	IGKV9-124*01	IGKV9-124*01	IGKV17-121*01
	IGKV9-120*01	IGKV14-100*01	IGKV9-120*01	IGKV14-100*01	IGKV9-120*01	IGKV8-30*01	IGKV17-121*01 F	IGKV9-120*01 F	IGKV14-100*01	IGKV9-120*01	IGKV14-100*01	IGKV17-121*01	IGKV14-100*01	IGKV17-121*01	IGKV17-121*01	IGKV14-100*01	IGKV4-70*01	IGKV9-124*01	IGKV9-124*01	IGKV17-121*01
	IGKV9-120*01	IGKV14-100*01	IGKV9-120*01	IGKV14-100*01	IGKV9-120*01	IGKV8-30*01	IGKV17-121*01 F	IGKV9-120*01 F	IGKV14-100*01	IGKV9-120*01	IGKV9-120*01	IGKV17-121*01	IGKV14-100*01	IGKV17-121*01	IGKV17-121*01	IGKV14-100*01	IGKV4-70*01	IGKV9-124*01	IGKV9-124*01	IGKV17-121*01
	IGKV9-120*01	IGKV14-100*01	IGKV9-120*01	IGKV14-100*01	IGKV9-120*01	IGKV8-30*01	IGKV17-121*01 F	IGKV9-120*01 F	IGKV14-100*01	IGKV9-120*01	IGKV9-120*01	IGKV17-121*01	IGKV14-100*01	IGKV17-121*01	IGKV4-91*01	IGKV14-100*01	IGKV4-70*01	IGKV9-124*01	IGKV9-124*01	IGKV17-121*01
	IGKV9-120*01	IGKV14-100*01	IGKV9-120*01	IGKV14-100*01	IGKV9-120*01	IGKV8-30*01	IGKV17-121*01 F	IGKV9-120*01 F	IGKV14-100*01	IGKV9-120*01	IGKV9-120*01	IGKV17-121*01	IGKV9-120*01	IGKV17-121*01	IGKV4-91*01	IGKV14-100*01	IGKV4-70*01	IGKV9-124*01	IGKV9-124*01	IGKV17-121*01
	IGKV9-120*01	IGKV14-100*01	IGKV9-120*01	IGKV14-100*01	IGKV9-120*01	IGKV9-120*01	IGKV17-121*01 F	IGKV9-120*01 F	IGKV14-100*01	IGKV9-120*01	IGKV14-100*01	IGKV17-121*01	IGKV9-120*01	IGKV17-121*01	IGKV4-91*01	IGKV14-100*01	IGKV4-70*01	IGKV9-124*01	IGKV9-124*01	IGKV17-121*01
	IGKV9-120*01	IGKV14-100*01	IGKV9-120*01	IGKV14-100*01	IGKV9-120*01	IGKV8-30*01	IGKV17-121*01 F	IGKV9-120*01 F	IGKV14-100*01	IGKV9-120*01	IGKV14-100*01	IGKV17-121*01	IGKV9-120*01	IGKV17-121*01	IGKV4-91*01	IGKV14-100*01	IGKV4-70*01	IGKV9-124*01	IGKV9-124*01	IGKV17-121*01
	IGKV9-120*01	IGKV14-100*01	IGKV9-120*01	IGKV14-100*01	IGKV9-120*01	IGKV8-30*01	IGKV17-121*01 F	IGKV9-120*01 F	IGKV14-100*01	IGKV9-120*01	IGKV9-120*01	IGKV17-121*01	IGKV14-100*01	IGKV17-121*01	IGKV17-121*01	IGKV14-100*01	IGKV4-70*01	IGKV9-124*01	IGKV9-124*01	IGKV17-121*01
	IGKV9-120*01	IGKV14-100*01	IGKV9-120*01	IGKV14-100*01	IGKV9-120*01	IGKV8-30*01	IGKV17-121*01 F	IGKV9-120*01 F	IGKV1-135*01	IGKV9-120*01	IGKV14-100*01	IGKV17-121*01	IGKV14-100*01	IGKV17-121*01	IGKV4-91*01	IGKV14-100*01	IGKV4-70*01	IGKV9-124*01	IGKV9-124*01	IGKV17-121*01
	IGKV9-120*01	IGKV14-100*01	IGKV9-120*01	IGKV14-100*01	IGKV9-120*01	IGKV8-30*01	IGKV17-121*01 F	IGKV9-120*01 F	IGKV14-100*01	IGKV9-120*01	IGKV14-100*01	IGKV17-121*01	IGKV14-100*01	IGKV17-121*01	IGKV17-121*01	IGKV14-100*01	IGKV4-70*01	IGKV9-124*01	IGKV9-124*01	IGKV17-121*01
	IGKV9-120*01	IGKV14-100*01	IGKV9-120*01	IGKV14-100*01	IGKV9-120*01	IGKV8-30*01	IGKV17-121*01 F	IGKV9-120*01 F	IGKV14-100*01	IGKV9-120*01	IGKV14-100*01	IGKV17-121*01	IGKV14-100*01	IGKV17-121*01	IGKV4-91*01	IGKV14-100*01	IGKV4-70*01	IGKV9-124*01	IGKV9-124*01	IGKV17-121*01
	IGKV9-120*01	IGKV14-100*01	IGKV9-120*01	IGKV14-100*01	IGKV9-120*01	IGKV8-30*01	IGKV17-121*01 F	IGKV9-120*01 F	IGKV14-100*01	IGKV9-120*01	IGKV14-100*01	IGKV17-121*01	IGKV9-120*01	IGKV17-121*01	IGKV4-91*01	IGKV14-100*01	IGKV4-70*01	IGKV9-124*01	IGKV9-124*01	IGKV17-121*01
	IGKV9-120*01	IGKV14-100*01	IGKV9-120*01	IGKV14-100*01	IGKV9-120*01	IGKV8-30*01	IGKV17-121*01 F	IGKV9-120*01 F	IGKV14-100*01	IGKV9-120*01	IGKV14-100*01	IGKV17-121*01	IGKV9-120*01	IGKV17-121*01	IGKV4-91*01	IGKV14-100*01	IGKV4-70*01	IGKV9-124*01	IGKV9-124*01	IGKV4-68*01
	IGKV9-120*01	IGKV14-100*01	IGKV9-120*01	IGKV14-100*01	IGKV9-120*01	IGKV8-30*01	IGKV17-121*01 F	IGKV9-120*01 F	IGKV14-100*01	IGKV9-120*01	IGKV14-100*01	IGKV17-121*01	IGKV14-100*01	IGKV17-121*01	IGKV4-91*01	IGKV14-100*01	IGKV4-70*01	IGKV9-124*01	IGKV9-124*01	IGKV17-121*01
	IGKV9-120*01	IGKV14-100*01	IGKV9-120*01	IGKV14-100*01	IGKV9-120*01	IGKV8-30*01	IGKV17-127*01 F	IGKV9-120*01 F	IGKV14-100*01	IGKV9-120*01	IGKV14-100*01	IGKV17-121*01	IGKV14-100*01	IGKV17-121*01	IGKV4-91*01	IGKV14-100*01	IGKV4-70*01	IGKV9-124*01	IGKV9-124*01	IGKV17-121*01
	IGKV9-120*01	IGKV14-100*01	IGKV9-120*01	IGKV14-100*01	IGKV9-120*01	IGKV8-30*01	IGKV3-4*01 F	IGKV9-120*01 F	IGKV14-100*01	IGKV9-120*01	IGKV9-120*01	IGKV17-121*01	IGKV14-100*01	IGKV17-121*01	IGKV4-91*01	IGKV14-100*01	IGKV4-70*01	IGKV9-124*01	IGKV9-124*01	IGKV17-121*01
	IGKV9-120*01	IGKV14-100*01	IGKV9-120*01	IGKV14-100*01	IGKV9-120*01	IGKV8-30*01	IGKV3-4*01 F	IGKV9-120*01 F	IGKV14-100*01	IGKV9-120*01	IGKV9-120*01	IGKV17-121*01	IGKV14-100*01	IGKV17-121*01	IGKV17-121*01	IGKV14-100*01	IGKV4-70*01	IGKV9-124*01	IGKV9-124*01	IGKV17-121*01
	IGKV9-120*01	IGKV14-100*01	IGKV9-120*01	IGKV14-100*01	IGKV9-120*01	IGKV8-30*01	IGKV3-5*01 F	IGKV14-111*01 F	IGKV14-100*01	IGKV9-120*01	IGKV9-120*01	IGKV17-121*01	IGKV14-100*01	IGKV17-121*01	IGKV4-91*01	IGKV14-100*01	IGKV4-70*01	IGKV9-124*01	IGKV9-124*01	IGKV17-121*01
	IGKV9-120*01	IGKV14-100*01	IGKV9-120*01	IGKV14-100*01	IGKV9-120*01	IGKV8-30*01	IGKV3-5*01 F	IGKV9-120*01 F	IGKV9-120*01	IGKV9-120*01	IGKV9-120*01	IGKV17-121*01	IGKV14-100*01	IGKV17-121*01	IGKV17-121*01	IGKV14-100*01	IGKV4-70*01	IGKV9-124*01	IGKV9-124*01	IGKV17-121*01
	IGKV9-120*01	IGKV14-100*01	IGKV9-120*01	IGKV14-100*01	IGKV9-120*01	IGKV8-30*01	IGKV4-50*01 F	IGKV9-120*01 F	IGKV14-100*01	IGKV9-120*01	IGKV14-100*01	IGKV17-121*01	IGKV14-100*01	IGKV17-121*01	IGKV4-91*01	IGKV14-100*01	IGKV4-70*01	IGKV9-124*01	IGKV9-124*01	IGKV17-121*01
	IGKV9-120*01	IGKV14-100*01	IGKV9-120*01	IGKV14-100*01	IGKV9-120*01	IGKV9-120*01	IGKV4-57*01 F	IGKV9-120*01 F	IGKV14-100*01	IGKV9-120*01	IGKV9-120*01	IGKV17-121*01	IGKV14-100*01	IGKV17-121*01	IGKV17-121*01	IGKV14-100*01	IGKV4-70*01	IGKV9-124*01	IGKV9-124*01	IGKV17-121*01
	IGKV9-120*01	IGKV14-100*01	IGKV9-120*01	IGKV14-100*01	IGKV9-120*01	IGKV8-30*01	IGKV4-59*01 F	IGKV9-120*01 F	IGKV14-100*01	IGKV9-120*01	IGKV9-120*01	IGKV17-121*01	IGKV14-100*01	IGKV17-121*01	IGKV4-91*01	IGKV14-100*01	IGKV4-70*01	IGKV9-124*01	IGKV9-124*01	IGKV17-121*01
	IGKV9-120*01	IGKV14-100*01	IGKV9-120*01	IGKV14-100*01	IGKV9-120*01	IGKV8-30*01	IGKV4-59*01 F	IGKV9-120*01 F	IGKV14-100*01	IGKV9-120*01	IGKV14-100*01	IGKV17-121*01	IGKV14-100*01	IGKV17-121*01	IGKV17-121*01	IGKV14-100*01	IGKV4-70*01	IGKV9-124*01	IGKV9-124*01	IGKV17-121*01
	IGKV9-120*01	IGKV14-100*01	IGKV9-120*01	IGKV14-100*01	IGKV9-120*01	IGKV8-30*01	IGKV4-59*01 F	IGKV9-120*01 F	IGKV14-100*01	IGKV9-120*01	IGKV14-100*01	IGKV17-121*01	IGKV14-100*01	IGKV17-121*01	IGKV4-91*01	IGKV14-100*01	IGKV4-70*01	IGKV9-124*01	IGKV9-124*01	IGKV17-121*01
	IGKV9-120*01	IGKV14-100*01	IGKV9-120*01	IGKV14-100*01	IGKV9-120*01	IGKV9-120*01	IGKV4-80*01 F	IGKV1-135*01 F	IGKV14-100*01	IGKV9-120*01	IGKV14-100*01	IGKV17-121*01	IGKV14-100*01	IGKV17-121*01	IGKV4-91*01	IGKV14-100*01	IGKV4-70*01	IGKV9-124*01	IGKV9-124*01	IGKV17-121*01
	IGKV9-120*01	IGKV14-100*01	IGKV9-120*01	IGKV14-100*01	IGKV9-120*01	IGKV9-120*01	IGKV4-90*01 F	IGKV14-111*01 F	IGKV14-100*01	IGKV9-120*01	IGKV9-120*01	IGKV17-121*01	IGKV9-120*01	IGKV17-121*01	IGKV4-91*01	IGKV14-100*01	IGKV4-70*01	IGKV9-124*01	IGKV9-124*01	IGKV17-121*01
	IGKV9-120*01	IGKV14-100*01	IGKV9-120*01	IGKV14-100*01	IGKV9-120*01	IGKV8-30*01	IGKV4-91*01 F	IGKV9-120*01 F	IGKV14-100*01	IGKV9-120*01	IGKV14-100*01	IGKV17-121*01	IGKV14-100*01	IGKV17-121*01	IGKV4-91*01	IGKV14-100*01	IGKV4-70*01	IGKV9-124*01	IGKV9-124*01	IGKV17-121*01
	IGKV9-120*01	IGKV14-100*01	IGKV9-120*01	IGKV14-100*01	IGKV9-120*01	IGKV8-30*01	IGKV4-91*01 F	IGKV9-120*01 F	IGKV14-100*01	IGKV9-120*01	IGKV9-120*01	IGKV17-121*01	IGKV14-100*01	IGKV17-121*01	IGKV4-91*01	IGKV14-100*01	IGKV4-70*01	IGKV9-124*01	IGKV9-124*01	IGKV17-121*01
	IGKV9-120*01	IGKV14-100*01	IGKV9-120*01	IGKV14-100*01	IGKV9-120*01	IGKV8-30*01	IGKV8-19*01 F	IGKV9-120*01 F	IGKV14-100*01	IGKV9-120*01	IGKV9-120*01	IGKV17-121*01	IGKV9-120*01	IGKV17-121*01	IGKV17-121*01	IGKV14-100*01	IGKV4-70*01	IGKV9-124*01	IGKV9-124*01	IGKV17-121*01
	IGKV9-120*01	IGKV14-100*01	IGKV9-120*01	IGKV14-100*01	IGKV9-120*01	IGKV9-120*01	IGKV8-24*01 F	IGKV14-111*01 F	IGKV17-121*01	IGKV9-120*01	IGKV9-120*01	IGKV17-121*01	IGKV9-120*01	IGKV17-121*01	IGKV4-91*01	IGKV14-100*01	IGKV4-70*01	IGKV9-124*01	IGKV9-124*01	IGKV17-121*01
	IGKV9-120*01	IGKV14-100*01	IGKV9-120*01	IGKV14-100*01	IGKV9-120*01	IGKV8-30*01	IGKV8-24*01 F	IGKV9-120*01 F	IGKV14-100*01	IGKV9-120*01	IGKV9-120*01	IGKV17-121*01	IGKV9-120*01	IGKV17-121*01	IGKV17-121*01	IGKV14-100*01	IGKV4-70*01	IGKV9-124*01	IGKV9-124*01	IGKV17-121*01
	IGKV9-120*01	IGKV14-100*01	IGKV9-120*01	IGKV14-100*01	IGKV9-120*01	IGKV8-30*01	IGKV9-120*01 F	IGKV9-120*01 F	IGKV4-91*01	IGKV9-120*01	IGKV9-120*01	IGKV17-121*01	IGKV9-120*01	IGKV17-121*01	IGKV17-121*01	IGKV14-100*01	IGKV4-70*01	IGKV9-124*01	IGKV9-124*01	IGKV17-121*01
	IGKV9-120*01	IGKV14-100*01	IGKV9-120*01	IGKV14-100*01	IGKV9-120*01	IGKV8-30*01	IGKV9-120*01 F	IGKV9-120*01 F	IGKV14-100*01	IGKV9-120*01	IGKV9-120*01	IGKV17-121*01	IGKV14-100*01	IGKV17-121*01	IGKV17-121*01	IGKV14-100*01	IGKV4-70*01	IGKV9-124*01	IGKV9-124*01	IGKV17-121*01
	IGKV9-120*01	IGKV14-100*01	IGKV9-120*01	IGKV14-100*01	IGKV9-120*01	IGKV8-30*01	IGKV9-120*01 F	IGKV9-120*01 F	IGKV14-100*01	IGKV9-120*01	IGKV9-120*01	IGKV17-121*01	IGKV9-120*01	IGKV17-121*01	IGKV17-121*01	IGKV14-100*01	IGKV4-70*01	IGKV9-124*01	IGKV9-124*01	IGKV17-121*01
	IGKV9-120*01	IGKV14-100*01	IGKV9-120*01	IGKV14-100*01	IGKV9-120*01	IGKV8-30*01	IGKV9-120*01 F	IGKV9-120*01 F	IGKV14-100*01	IGKV9-120*01	IGKV14-100*01	IGKV17-121*01	IGKV14-100*01	IGKV17-121*01	IGKV17-121*01	IGKV14-100*01	IGKV4-70*01	IGKV9-124*01	IGKV9-124*01	IGKV17-121*01
	IGKV9-120*01	IGKV14-100*01	IGKV9-120*01	IGKV14-100*01	IGKV9-120*01	IGKV9-120*01	IGKV9-120*01 F	IGKV9-120*01 F	IGKV14-100*01	IGKV9-120*01	IGKV14-100*01	IGKV17-121*01	IGKV14-100*01	IGKV17-121*01	IGKV17-121*01	IGKV14-100*01	IGKV4-70*01	IGKV9-124*01	IGKV9-124*01	IGKV17-121*01
	IGKV9-120*01	IGKV14-100*01	IGKV9-120*01	IGKV14-100*01	IGKV9-120*01	IGKV9-120*01	IGKV9-120*01 F	IGKV9-120*01 F	IGKV14-100*01	IGKV9-120*01	IGKV9-120*01	IGKV17-121*01	IGKV9-120*01	IGKV17-121*01	IGKV17-121*01	IGKV14-100*01	IGKV4-70*01	IGKV9-124*01	IGKV9-124*01	IGKV17-121*01
	IGKV9-120*01	IGKV14-100*01	IGKV9-120*01	IGKV14-100*01	IGKV9-120*01	IGKV8-30*01	IGKV9-120*01 F	IGKV14-111*01 F	IGKV14-100*01	IGKV9-120*01	IGKV9-120*01	IGKV17-121*01	IGKV14-100*01	IGKV17-121*01	IGKV4-91*01	IGKV14-100*01	IGKV4-70*01	IGKV9-124*01	IGKV9-124*01	IGKV17-121*01
	IGKV9-120*01	IGKV14-100*01	IGKV9-120*01	IGKV14-100*01	IGKV9-120*01	IGKV9-120*01	IGKV9-120*01 F	IGKV9-120*01 F	IGKV14-100*01	IGKV9-120*01	IGKV14-100*01	IGKV17-121*01	IGKV14-100*01	IGKV17-121*01	IGKV17-121*01	IGKV14-100*01	IGKV4-70*01	IGKV9-124*01	IGKV9-124*01	IGKV17-121*01
	IGKV9-120*01	IGKV14-100*01	IGKV9-120*01	IGKV14-100*01	IGKV9-120*01	IGKV9-120*01	IGKV9-120*01 F	IGKV9-120*01 F	IGKV14-100*01	IGKV9-120*01	IGKV9-120*01	IGKV17-121*01	IGKV14-100*01	IGKV17-121*01	IGKV17-121*01	IGKV14-100*01	IGKV4-70*01	IGKV9-124*01	IGKV9-124*01	IGKV17-121*01
	IGKV9-120*01	IGKV14-100*01	IGKV9-120*01	IGKV14-100*01	IGKV9-120*01	IGKV9-120*01	IGKV9-120*01 F	IGKV9-120*01 F	IGKV14-100*01	IGKV9-120*01	IGKV14-100*01	IGKV17-121*01	IGKV14-100*01	IGKV17-121*01	IGKV4-91*01	IGKV14-100*01	IGKV4-70*01	IGKV9-124*01	IGKV9-124*01	IGKV17-121*01
	IGKV9-120*01	IGKV14-100*01	IGKV9-120*01	IGKV14-100*01	IGKV9-120*01	IGKV8-30*01	IGKV9-120*01 F	IGKV9-120*01 F	IGKV14-100*01	IGKV9-120*01	IGKV14-100*01	IGKV17-121*01	IGKV14-100*01	IGKV17-121*01	IGKV4-91*01	IGKV14-100*01	IGKV4-70*01	IGKV9-124*01	IGKV9-124*01	IGKV17-121*01
	IGKV9-120*01	IGKV14-100*01	IGKV9-120*01	IGKV14-100*01	IGKV9-120*01	IGKV9-120*01	IGKV9-120*01 F	IGKV9-120*01 F	IGKV14-100*01	IGKV9-120*01	IGKV9-120*01	IGKV17-121*01	IGKV14-100*01	IGKV17-121*01	IGKV4-91*01	IGKV14-100*01	IGKV4-70*01	IGKV9-124*01	IGKV9-124*01	IGKV17-121*01
	IGKV9-120*01	IGKV14-100*01	IGKV9-120*01	IGKV14-100*01	IGKV9-120*01	IGKV8-30*01	IGKV9-120*01 F	IGKV9-120*01 F	IGKV14-100*01	IGKV9-120*01	IGKV9-120*01	IGKV17-121*01	IGKV14-100*01	IGKV17-121*01	IGKV17-121*01	IGKV14-100*01	IGKV4-70*01	IGKV9-124*01	IGKV9-124*01	IGKV17-121*01
	IGKV9-120*01	IGKV14-100*01	IGKV9-120*01	IGKV14-100*01	IGKV9-120*01	IGKV9-120*01	IGKV9-120*01 F	IGKV9-120*01 F	IGKV14-100*01	IGKV9-120*01	IGKV14-100*01	IGKV17-121*01	IGKV9-120*01	IGKV17-121*01	IGKV17-121*01	IGKV14-100*01	IGKV4-70*01	IGKV9-124*01	IGKV9-124*01	IGKV17-121*01
	IGKV9-120*01	IGKV14-100*01	IGKV9-120*01	IGKV14-100*01	IGKV9-120*01	IGKV8-30*01	IGKV9-120*01 F	IGKV9-120*01 F	IGKV14-100*01	IGKV9-120*01	IGKV9-120*01	IGKV17-121*01	IGKV14-100*01	IGKV17-121*01	IGKV4-91*01	IGKV14-100*01	IGKV4-70*01	IGKV9-124*01	IGKV9-124*01	IGKV17-121*01
	IGKV9-120*01	IGKV14-100*01	IGKV9-120*01	IGKV14-100*01	IGKV9-120*01	IGKV8-30*01	IGKV9-120*01 F	IGKV9-120*01 F	IGKV17-121*01	IGKV9-120*01	IGKV9-120*01	IGKV17-121*01	IGKV14-100*01	IGKV17-121*01	IGKV17-121*01	IGKV14-100*01	IGKV4-70*01	IGKV9-124*01	IGKV9-124*01	IGKV17-121*01
	IGKV9-120*01	IGKV14-100*01	IGKV9-120*01	IGKV14-100*01	IGKV9-120*01	IGKV8-30*01	IGKV9-120*01 F	IGKV9-120*01 F	IGKV17-121*01	IGKV9-120*01	IGKV9-120*01	IGKV17-121*01	IGKV9-120*01	IGKV17-121*01	IGKV4-91*01	IGKV14-100*01	IGKV4-70*01	IGKV9-124*01	IGKV9-124*01	IGKV17-121*01
	IGKV9-120*01	IGKV14-100*01	IGKV9-120*01	IGKV14-100*01	IGKV9-120*01	IGKV8-30*01	IGKV9-120*01 F	IGKV9-120*01 F	IGKV14-100*01	IGKV9-120*01	IGKV9-120*01	IGKV17-121*01	IGKV14-100*01	IGKV17-121*01	IGKV4-91*01	IGKV14-100*01	IGKV4-70*01	IGKV4-53*01	IGKV9-124*01	IGKV17-121*01
	IGKV9-120*01	IGKV14-100*01	IGKV9-120*01	IGKV14-100*01	IGKV9-120*01	IGKV8-30*01	IGKV9-120*01 F	IGKV14-111*01 F	IGKV14-100*01	IGKV9-120*01	IGKV14-100*01	IGKV17-121*01	IGKV14-100*01	IGKV17-121*01	IGKV4-91*01	IGKV14-100*01	IGKV4-70*01	IGKV9-124*01	IGKV9-124*01	IGKV17-121*01
	IGKV9-120*01	IGKV14-100*01	IGKV9-120*01	IGKV14-100*01	IGKV9-120*01	IGKV8-30*01	IGKV9-120*01 F	IGKV14-111*01 F	IGKV14-100*01	IGKV9-120*01	IGKV9-120*01	IGKV17-121*01	IGKV14-100*01	IGKV17-121*01	IGKV17-121*01	IGKV14-100*01	IGKV4-70*01	IGKV9-124*01	IGKV9-124*01	IGKV17-121*01
	IGKV9-120*01	IGKV14-100*01	IGKV9-120*01	IGKV14-100*01	IGKV9-120*01	IGKV8-30*01	IGKV9-120*01 F	IGKV9-120*01 F	IGKV14-100*01	IGKV9-120*01	IGKV14-100*01	IGKV17-121*01	IGKV14-100*01	IGKV17-121*01	IGKV17-121*01	IGKV14-100*01	IGKV4-70*01	IGKV9-124*01	IGKV9-124*01	IGKV17-121*01
	IGKV9-120*01	IGKV14-100*01	IGKV9-120*01	IGKV14-100*01	IGKV9-120*01	IGKV8-30*01	IGKV9-120*01 F	IGKV9-120*01 F	IGKV14-100*01	IGKV9-120*01	IGKV9-120*01	IGKV17-121*01	IGKV9-120*01	IGKV17-121*01	IGKV17-121*01	IGKV14-100*01	IGKV4-70*01	IGKV9-124*01	IGKV9-124*01	IGKV17-121*01
	IGKV9-120*01	IGKV14-100*01	IGKV9-120*01	IGKV14-100*01	IGKV9-120*01	IGKV8-30*01	IGKV9-120*01 F	IGKV14-111*01 F	IGKV14-100*01	IGKV9-120*01	IGKV9-120*01	IGKV17-121*01	IGKV14-100*01	IGKV17-121*01	IGKV4-91*01	IGKV14-100*01	IGKV4-70*01	IGKV9-124*01	IGKV9-124*01	IGKV17-121*01
	IGKV9-120*01	IGKV14-100*01	IGKV9-120*01	IGKV14-100*01	IGKV9-120*01	IGKV8-30*01	IGKV9-120*01 F	IGKV14-111*01 F	IGKV14-100*01	IGKV9-120*01	IGKV14-100*01	IGKV17-121*01	IGKV14-100*01	IGKV17-121*01	IGKV4-91*01	IGKV14-100*01	IGKV4-70*01	IGKV9-124*01	IGKV9-124*01	IGKV17-121*01
	IGKV9-120*01	IGKV14-100*01	IGKV9-120*01	IGKV14-100*01	IGKV9-120*01	IGKV8-30*01	IGKV9-120*01 F	IGKV9-120*01 F	IGKV14-100*01	IGKV9-120*01	IGKV14-100*01	IGKV17-121*01	IGKV14-100*01	IGKV17-121*01	IGKV17-121*01	IGKV14-100*01	IGKV4-70*01	IGKV9-124*01	IGKV9-124*01	IGKV17-121*01
	IGKV9-120*01	IGKV14-100*01	IGKV9-120*01	IGKV14-100*01	IGKV9-120*01	IGKV8-30*01	IGKV9-120*01 F	IGKV9-120*01 F	IGKV14-100*01	IGKV9-120*01	IGKV9-120*01	IGKV17-121*01	IGKV14-100*01	IGKV17-121*01	IGKV4-91*01	IGKV14-100*01	IGKV4-70*01	IGKV9-124*01	IGKV9-124*01	IGKV17-121*01
	IGKV9-120*01	IGKV14-100*01	IGKV9-120*01	IGKV14-100*01	IGKV9-120*01	IGKV8-30*01	IGKV9-120*01 F	IGKV9-120*01 F	IGKV14-100*01	IGKV9-120*01	IGKV14-100*01	IGKV17-121*01	IGKV14-100*01	IGKV17-121*01	IGKV4-91*01	IGKV14-100*01	IGKV4-70*01	IGKV9-124*01	IGKV9-124*01	IGKV17-121*01
	IGKV9-120*01	IGKV14-100*01	IGKV9-120*01	IGKV14-100*01	IGKV9-120*01	IGKV9-120*01	IGKV9-120*01 F	IGKV9-120*01 F	IGKV14-100*01	IGKV9-120*01	IGKV14-100*01	IGKV17-121*01	IGKV14-100*01	IGKV17-121*01	IGKV4-91*01	IGKV14-100*01	IGKV4-70*01	IGKV9-124*01	IGKV9-124*01	IGKV17-121*01
	IGKV9-120*01	IGKV14-100*01	IGKV9-120*01	IGKV14-100*01	IGKV9-120*01	IGKV9-120*01	IGKV9-120*01 F	IGKV14-111*01 F	IGKV14-100*01	IGKV9-120*01	IGKV14-100*01	IGKV17-121*01	IGKV14-100*01	IGKV17-121*01	IGKV4-91*01	IGKV14-100*01	IGKV4-70*01	IGKV9-124*01	IGKV9-124*01	IGKV17-121*01
	IGKV9-120*01	IGKV14-100*01	IGKV9-120*01	IGKV14-100*01	IGKV9-120*01	IGKV8-30*01	IGKV9-120*01 F	IGKV9-120*01 F	IGKV14-100*01	IGKV9-120*01	IGKV14-100*01	IGKV17-121*01	IGKV14-100*01	IGKV17-121*01	IGKV4-91*01	IGKV14-100*01	IGKV4-70*01	IGKV9-124*01	IGKV9-124*01	IGKV17-121*01
	IGKV9-120*01	IGKV14-100*01	IGKV9-120*01	IGKV14-100*01	IGKV9-120*01	IGKV8-30*01	IGKV9-120*01 F	IGKV14-111*01 F	IGKV14-100*01	IGKV9-120*01	IGKV9-120*01	IGKV17-121*01	IGKV14-100*01	IGKV17-121*01	IGKV17-121*01	IGKV14-100*01	IGKV4-70*01	IGKV9-124*01	IGKV9-124*01	IGKV17-121*01
	IGKV9-120*01	IGKV14-100*01	IGKV9-120*01	IGKV14-100*01	IGKV9-120*01	IGKV8-30*01	IGKV9-120*01 F	IGKV14-111*01 F	IGKV14-100*01	IGKV9-120*01	IGKV14-100*01	IGKV17-121*01	IGKV14-100*01	IGKV17-121*01	IGKV17-121*01	IGKV14-100*01	IGKV4-70*01	IGKV9-124*01	IGKV9-124*01	IGKV17-121*01
	IGKV9-120*01	IGKV14-100*01	IGKV9-120*01	IGKV14-100*01	IGKV9-120*01	IGKV8-30*01	IGKV9-120*01 F	IGKV9-120*01 F	IGKV14-100*01	IGKV9-120*01	IGKV9-120*01	IGKV17-121*01	IGKV14-100*01	IGKV17-121*01	IGKV17-121*01	IGKV14-100*01	IGKV4-70*01	IGKV9-124*01	IGKV9-124*01	IGKV17-121*01
	IGKV9-120*01	IGKV14-100*01	IGKV9-120*01	IGKV14-100*01	IGKV9-120*01	IGKV8-30*01	IGKV9-120*01 F	IGKV9-120*01 F	IGKV14-100*01	IGKV9-120*01	IGKV14-100*01	IGKV17-121*01	IGKV14-100*01	IGKV17-121*01	IGKV17-121*01	IGKV14-100*01	IGKV4-70*01	IGKV9-124*01	IGKV9-124*01	IGKV17-121*01
	IGKV9-120*01	IGKV14-100*01	IGKV9-120*01	IGKV14-100*01	IGKV9-120*01	IGKV8-30*01	IGKV9-120*01 F	IGKV9-120*01 F	IGKV1-135*01	IGKV9-120*01	IGKV14-100*01	IGKV17-121*01	IGKV14-100*01	IGKV17-121*01	IGKV4-91*01	IGKV14-100*01	IGKV4-70*01	IGKV9-124*01	IGKV9-124*01	IGKV17-121*01
	IGKV9-120*01	IGKV14-100*01	IGKV9-120*01	IGKV14-100*01	IGKV9-120*01	IGKV9-120*01	IGKV9-120*01 F	IGKV9-120*01 F	IGKV14-100*01	IGKV9-120*01	IGKV9-120*01	IGKV17-121*01	IGKV14-100*01	IGKV17-121*01	IGKV17-121*01	IGKV14-100*01	IGKV4-70*01	IGKV9-124*01	IGKV9-124*01	IGKV17-121*01
	IGKV9-120*01	IGKV14-100*01	IGKV9-120*01	IGKV14-100*01	IGKV9-120*01	IGKV9-120*01	IGKV9-120*01 F	IGKV9-120*01 F	IGKV14-100*01	IGKV9-120*01	IGKV14-100*01	IGKV17-121*01	IGKV14-100*01	IGKV17-121*01	IGKV4-91*01	IGKV14-100*01	IGKV4-70*01	IGKV4-53*01	IGKV9-124*01	IGKV17-121*01
	IGKV9-120*01	IGKV14-100*01	IGKV9-120*01	IGKV14-100*01	IGKV9-120*01	IGKV8-30*01	IGKV9-120*01 F	IGKV9-120*01 F	IGKV14-100*01	IGKV9-120*01	IGKV14-100*01	IGKV17-121*01	IGKV14-100*01	IGKV17-121*01	IGKV17-121*01	IGKV14-100*01	IGKV4-70*01	IGKV9-124*01	IGKV9-124*01	IGKV17-121*01
	IGKV9-120*01	IGKV14-100*01	IGKV9-120*01	IGKV14-100*01	IGKV9-120*01	IGKV8-30*01	IGKV9-120*01 F	IGKV9-120*01 F	IGKV1-117*01	IGKV9-120*01	IGKV9-120*01	IGKV17-121*01	IGKV14-100*01	IGKV17-121*01	IGKV4-91*01	IGKV14-100*01	IGKV4-70*01	IGKV9-124*01	IGKV9-124*01	IGKV17-121*01
	IGKV9-120*01	IGKV14-100*01	IGKV9-120*01	IGKV14-100*01	IGKV9-120*01	IGKV9-120*01	IGKV9-120*01 F	IGKV9-120*01 F	IGKV14-100*01	IGKV9-120*01	IGKV9-120*01	IGKV17-121*01	IGKV9-120*01	IGKV17-121*01	IGKV17-121*01	IGKV14-100*01	IGKV4-70*01	IGKV9-124*01	IGKV9-124*01	IGKV17-121*01
	IGKV9-120*01	IGKV14-100*01	IGKV9-120*01	IGKV14-100*01	IGKV9-120*01	IGKV8-30*01	IGKV9-120*01 F	IGKV9-120*01 F	IGKV4-59*01	IGKV9-120*01	IGKV14-100*01	IGKV17-121*01	IGKV14-100*01	IGKV17-121*01	IGKV4-91*01	IGKV14-100*01	IGKV4-70*01	IGKV9-124*01	IGKV9-124*01	IGKV17-121*01
	IGKV9-120*01	IGKV14-100*01	IGKV9-120*01	IGKV14-100*01	IGKV9-120*01	IGKV8-30*01	IGKV9-120*01 F	IGKV9-120*01 F	IGKV14-100*01	IGKV9-120*01	IGKV9-120*01	IGKV17-121*01	IGKV9-120*01	IGKV17-121*01	IGKV17-121*01	IGKV14-100*01	IGKV4-70*01	IGKV9-124*01	IGKV9-124*01	IGKV17-121*01
	IGKV9-120*01	IGKV14-100*01	IGKV9-120*01	IGKV14-100*01	IGKV9-120*01	IGKV8-30*01	IGKV9-120*01 F	IGKV9-120*01 F	IGKV1-135*01	IGKV9-120*01	IGKV14-100*01	IGKV17-121*01	IGKV14-100*01	IGKV17-121*01	IGKV17-121*01	IGKV14-100*01	IGKV4-70*01	IGKV9-124*01	IGKV9-124*01	IGKV17-121*01
	IGKV9-120*01	IGKV14-100*01	IGKV9-120*01	IGKV14-100*01	IGKV9-120*01	IGKV8-30*01	IGKV9-120*01 F	IGKV9-120*01 F	IGKV14-100*01	IGKV9-120*01	IGKV14-100*01	IGKV17-121*01	IGKV14-100*01	IGKV17-121*01	IGKV4-91*01	IGKV14-100*01	IGKV4-70*01	IGKV9-124*01	IGKV9-124*01	IGKV17-121*01
	IGKV9-120*01	IGKV14-100*01	IGKV9-120*01	IGKV14-100*01	IGKV9-120*01	IGKV8-30*01	IGKV9-120*01 F	IGKV9-120*01 F	IGKV14-100*01	IGKV9-120*01	IGKV14-100*01	IGKV17-121*01	IGKV14-100*01	IGKV17-121*01	IGKV17-121*01	IGKV14-100*01	IGKV4-70*01	IGKV9-124*01	IGKV9-124*01	IGKV17-121*01
	IGKV9-120*01	IGKV14-100*01	IGKV9-120*01	IGKV14-100*01	IGKV9-120*01	IGKV8-30*01	IGKV9-120*01 F	IGKV9-120*01 F	IGKV14-100*01	IGKV9-120*01	IGKV14-100*01	IGKV17-121*01	IGKV14-100*01	IGKV17-121*01	IGKV17-121*01	IGKV14-100*01	IGKV4-70*01	IGKV9-124*01	IGKV9-124*01	IGKV17-121*01
	IGKV9-120*01	IGKV14-100*01	IGKV9-120*01	IGKV14-100*01	IGKV9-120*01	IGKV8-30*01	IGKV9-120*01 F	IGKV14-111*01 F	IGKV14-100*01	IGKV9-120*01	IGKV9-120*01	IGKV17-121*01	IGKV14-100*01	IGKV17-121*01	IGKV17-121*01	IGKV14-100*01	IGKV4-70*01	IGKV9-124*01	IGKV9-124*01	IGKV17-121*01
	IGKV9-120*01	IGKV14-100*01	IGKV9-120*01	IGKV14-100*01	IGKV9-120*01	IGKV9-120*01	IGKV9-120*01 F	IGKV14-111*01 F	IGKV14-100*01	IGKV9-120*01	IGKV9-120*01	IGKV17-121*01	IGKV14-100*01	IGKV17-121*01	IGKV17-121*01	IGKV14-100*01	IGKV4-70*01	IGKV9-124*01	IGKV9-124*01	IGKV17-121*01
	IGKV9-120*01	IGKV14-100*01	IGKV9-120*01	IGKV14-100*01	IGKV9-120*01	IGKV8-30*01	IGKV9-120*01 F	IGKV9-120*01 F	IGKV14-100*01	IGKV9-120*01	IGKV14-100*01	IGKV17-121*01	IGKV14-100*01	IGKV17-121*01	IGKV17-121*01	IGKV14-100*01	IGKV4-70*01	IGKV9-124*01	IGKV9-124*01	IGKV17-121*01
	IGKV9-120*01	IGKV14-100*01	IGKV9-120*01	IGKV14-100*01	IGKV9-120*01	IGKV8-30*01	IGKV9-120*01 F	IGKV9-120*01 F	IGKV14-100*01	IGKV9-120*01	IGKV9-120*01	IGKV17-121*01	IGKV14-100*01	IGKV17-121*01	IGKV17-121*01	IGKV14-100*01	IGKV4-70*01	IGKV9-124*01	IGKV9-124*01	IGKV17-121*01
	IGKV9-120*01	IGKV14-100*01	IGKV9-120*01	IGKV14-100*01	IGKV9-120*01	IGKV9-120*01	IGKV9-120*01 F	IGKV14-111*01 F	IGKV14-100*01	IGKV9-120*01	IGKV14-100*01	IGKV17-121*01	IGKV14-100*01	IGKV17-121*01	IGKV4-91*01	IGKV14-100*01	IGKV4-70*01	IGKV9-124*01	IGKV9-124*01	IGKV17-121*01
	IGKV9-120*01	IGKV14-100*01	IGKV9-120*01	IGKV14-100*01	IGKV9-120*01	IGKV8-30*01	IGKV9-120*01 F	IGKV9-120*01 F	IGKV14-100*01	IGKV9-120*01	IGKV14-100*01	IGKV17-121*01	IGKV14-100*01	IGKV17-121*01	IGKV17-121*01	IGKV14-100*01	IGKV4-70*01	IGKV9-124*01	IGKV9-124*01	IGKV17-121*01
	IGKV9-120*01	IGKV14-100*01	IGKV9-120*01	IGKV14-100*01	IGKV9-120*01	IGKV9-120*01	IGKV9-120*01 F	IGKV9-120*01 F	IGKV1-135*01	IGKV9-120*01	IGKV9-120*01	IGKV17-121*01	IGKV14-100*01	IGKV17-121*01	IGKV17-121*01	IGKV14-100*01	IGKV4-70*01	IGKV9-124*01	IGKV9-124*01	IGKV17-121*01
	IGKV9-120*01	IGKV14-100*01	IGKV9-120*01	IGKV14-100*01	IGKV9-120*01	IGKV8-30*01	IGKV9-120*01 F	IGKV9-120*01 F	IGKV14-100*01	IGKV9-120*01	IGKV14-100*01	IGKV17-121*01	IGKV14-100*01	IGKV17-121*01	IGKV4-91*01	IGKV14-100*01	IGKV4-70*01	IGKV9-124*01	IGKV9-124*01	IGKV17-121*01
	IGKV9-120*01	IGKV14-100*01	IGKV9-120*01	IGKV14-100*01	IGKV9-120*01	IGKV9-120*01	IGKV9-120*01 F	IGKV9-120*01 F	IGKV14-100*01	IGKV9-120*01	IGKV14-100*01	IGKV17-121*01	IGKV14-100*01	IGKV17-121*01	IGKV17-121*01	IGKV14-100*01	IGKV4-70*01	IGKV9-124*01	IGKV9-124*01	IGKV17-121*01
	IGKV9-120*01	IGKV14-100*01	IGKV9-120*01	IGKV14-100*01	IGKV9-120*01	IGKV9-120*01	IGKV9-120*01 F	IGKV9-120*01 F	IGKV14-100*01	IGKV9-120*01	IGKV9-120*01	IGKV17-121*01	IGKV14-100*01	IGKV17-121*01	IGKV4-91*01	IGKV14-100*01	IGKV4-70*01	IGKV9-124*01	IGKV9-124*01	IGKV17-121*01
	IGKV9-120*01	IGKV14-100*01	IGKV9-120*01	IGKV14-100*01	IGKV9-120*01	IGKV9-120*01	IGKV9-120*01 F	IGKV9-120*01 F	IGKV14-100*01	IGKV9-120*01	IGKV9-120*01	IGKV17-121*01	IGKV14-100*01	IGKV17-121*01	IGKV4-91*01	IGKV14-100*01	IGKV4-70*01	IGKV9-124*01	IGKV9-124*01	IGKV17-121*01
	IGKV9-120*01	IGKV14-100*01	IGKV9-120*01	IGKV14-100*01	IGKV9-120*01	IGKV9-120*01	IGKV9-120*01 F	IGKV9-120*01 F	IGKV14-100*01	IGKV9-120*01	IGKV14-100*01	IGKV17-121*01	IGKV14-100*01	IGKV17-121*01	IGKV4-91*01	IGKV14-100*01	IGKV4-70*01	IGKV9-124*01	IGKV9-124*01	IGKV17-121*01
	IGKV9-120*01	IGKV14-100*01	IGKV9-120*01	IGKV14-100*01	IGKV9-120*01	IGKV8-30*01	IGKV9-120*01 F	IGKV9-120*01 F	IGKV14-100*01	IGKV9-120*01	IGKV14-100*01	IGKV17-121*01	IGKV14-100*01	IGKV17-121*01	IGKV17-121*01	IGKV14-100*01	IGKV4-70*01	IGKV9-124*01	IGKV9-124*01	IGKV17-121*01
	IGKV9-120*01	IGKV14-100*01	IGKV9-120*01	IGKV14-100*01	IGKV9-120*01	IGKV8-30*01	IGKV9-120*01 F	IGKV14-111*01 F	IGKV14-100*01	IGKV9-120*01	IGKV14-100*01	IGKV17-121*01	IGKV9-120*01	IGKV17-121*01	IGKV17-121*01	IGKV14-100*01	IGKV4-70*01	IGKV4-53*01	IGKV9-124*01	IGKV17-121*01
	IGKV9-120*01	IGKV14-100*01	IGKV9-120*01	IGKV14-100*01	IGKV9-120*01	IGKV8-30*01	IGKV9-120*01 F	IGKV9-120*01 F	IGKV17-121*01	IGKV9-120*01	IGKV9-120*01	IGKV17-121*01	IGKV9-120*01	IGKV17-121*01	IGKV17-121*01	IGKV14-100*01	IGKV4-70*01	IGKV9-124*01	IGKV9-124*01	IGKV17-121*01
	IGKV9-120*01	IGKV14-100*01	IGKV9-120*01	IGKV14-100*01	IGKV9-120*01	IGKV8-30*01	IGKV9-120*01 F	IGKV9-120*01 F	IGKV14-100*01	IGKV9-120*01	IGKV14-100*01	IGKV17-121*01	IGKV9-120*01	IGKV17-121*01	IGKV17-121*01	IGKV14-100*01	IGKV4-70*01	IGKV9-124*01	IGKV9-124*01	IGKV17-121*01
	IGKV9-120*01	IGKV14-100*01	IGKV9-120*01	IGKV14-100*01	IGKV9-120*01	IGKV8-30*01	IGKV9-120*01 F	IGKV9-120*01 F	IGKV1-135*01	IGKV9-120*01	IGKV14-100*01	IGKV17-121*01	IGKV14-100*01	IGKV17-121*01	IGKV17-121*01	IGKV14-100*01	IGKV4-70*01	IGKV9-124*01	IGKV9-124*01	IGKV17-121*01
	IGKV9-120*01	IGKV14-100*01	IGKV9-120*01	IGKV14-100*01	IGKV9-120*01	IGKV8-30*01	IGKV9-120*01 F	IGKV9-120*01 F	IGKV14-100*01	IGKV9-120*01	IGKV14-100*01	IGKV17-121*01	IGKV14-100*01	IGKV17-121*01	IGKV4-91*01	IGKV14-100*01	IGKV4-70*01	IGKV9-124*01	IGKV9-124*01	IGKV17-121*01
	IGKV9-120*01	IGKV14-100*01	IGKV9-120*01	IGKV14-100*01	IGKV9-120*01	IGKV8-30*01	IGKV9-120*01 F	IGKV9-120*01 F	IGKV14-100*01	IGKV9-120*01	IGKV9-120*01	IGKV17-121*01	IGKV14-100*01	IGKV17-121*01	IGKV17-121*01	IGKV14-100*01	IGKV4-70*01	IGKV9-124*01	IGKV9-124*01	IGKV17-121*01
	IGKV9-120*01	IGKV14-100*01	IGKV9-120*01	IGKV14-100*01	IGKV9-120*01	IGKV8-30*01	IGKV9-120*01 F	IGKV9-120*01 F	IGKV17-121*01	IGKV9-120*01	IGKV14-100*01	IGKV17-121*01	IGKV9-120*01	IGKV17-121*01	IGKV17-121*01	IGKV14-100*01	IGKV4-70*01	IGKV9-124*01	IGKV9-124*01	IGKV17-121*01
	IGKV9-120*01	IGKV14-100*01	IGKV9-120*01	IGKV14-100*01	IGKV9-120*01	IGKV9-120*01	IGKV9-120*01 F	IGKV9-120*01 F	IGKV14-100*01	IGKV9-120*01	IGKV14-100*01	IGKV17-121*01	IGKV14-100*01	IGKV17-121*01	IGKV4-91*01	IGKV14-100*01	IGKV4-70*01	IGKV9-124*01	IGKV9-124*01	IGKV17-121*01
	IGKV9-120*01	IGKV14-100*01	IGKV9-120*01	IGKV14-100*01	IGKV9-120*01	IGKV8-30*01	IGKV9-120*01 F	IGKV9-120*01 F	IGKV14-100*01	IGKV9-120*01	IGKV9-120*01	IGKV17-121*01	IGKV14-100*01	IGKV17-121*01	IGKV4-91*01	IGKV14-100*01	IGKV4-70*01	IGKV9-124*01	IGKV9-124*01	IGKV17-121*01
	IGKV9-120*01	IGKV14-100*01	IGKV9-120*01	IGKV14-100*01	IGKV9-120*01	IGKV8-30*01	IGKV9-120*01 F	IGKV14-111*01 F	IGKV14-100*01	IGKV9-120*01	IGKV9-120*01	IGKV17-121*01	IGKV14-100*01	IGKV17-121*01	IGKV17-121*01	IGKV14-100*01	IGKV4-70*01	IGKV9-124*01	IGKV9-124*01	IGKV17-121*01
	IGKV9-120*01	IGKV14-100*01	IGKV9-120*01	IGKV14-100*01	IGKV9-120*01	IGKV9-120*01	IGKV9-120*01 F	IGKV9-120*01 F	IGKV1-135*01	IGKV9-120*01	IGKV14-100*01	IGKV17-121*01	IGKV14-100*01	IGKV17-121*01	IGKV4-91*01	IGKV14-100*01	IGKV4-70*01	IGKV9-124*01	IGKV9-124*01	IGKV17-121*01
	IGKV9-120*01	IGKV14-100*01	IGKV9-120*01	IGKV14-100*01	IGKV9-120*01	IGKV8-30*01	IGKV9-120*01 F	IGKV14-111*01 F	IGKV14-100*01	IGKV9-120*01	IGKV9-120*01	IGKV17-121*01	IGKV14-100*01	IGKV17-121*01	IGKV17-121*01	IGKV14-100*01	IGKV4-70*01	IGKV9-124*01	IGKV9-124*01	IGKV17-121*01
	IGKV9-120*01	IGKV14-100*01	IGKV9-120*01	IGKV14-100*01	IGKV9-120*01	IGKV9-120*01	IGKV9-120*01 F	IGKV14-111*01 F	IGKV9-120*01	IGKV9-120*01	IGKV14-100*01	IGKV17-121*01	IGKV14-100*01	IGKV17-121*01	IGKV4-91*01	IGKV14-100*01	IGKV4-70*01	IGKV9-124*01	IGKV9-124*01	IGKV17-121*01
	IGKV9-120*01	IGKV14-100*01	IGKV9-120*01	IGKV14-100*01	IGKV9-120*01	IGKV8-30*01	IGKV9-120*01 F	IGKV9-120*01 F	IGKV14-100*01	IGKV9-120*01	IGKV14-100*01	IGKV17-121*01	IGKV14-100*01	IGKV17-121*01	IGKV4-91*01	IGKV14-100*01	IGKV4-70*01	IGKV9-124*01	IGKV9-124*01	IGKV17-121*01
	IGKV9-120*01	IGKV14-100*01	IGKV9-120*01	IGKV14-100*01	IGKV9-120*01	IGKV8-30*01	IGKV9-120*01 F	IGKV9-120*01 F	IGKV14-100*01	IGKV9-120*01	IGKV9-120*01	IGKV17-121*01	IGKV14-100*01	IGKV17-121*01	IGKV4-91*01	IGKV14-100*01	IGKV4-70*01	IGKV9-124*01	IGKV9-124*01	IGKV17-121*01
	IGKV9-120*01	IGKV14-100*01	IGKV9-120*01	IGKV14-100*01	IGKV9-120*01	IGKV8-30*01	IGKV9-120*01 F	IGKV9-120*01 F	IGKV14-100*01	IGKV9-120*01	IGKV14-100*01	IGKV17-121*01	IGKV9-120*01	IGKV17-121*01	IGKV4-91*01	IGKV14-100*01	IGKV4-70*01	IGKV9-124*01	IGKV9-124*01	IGKV17-121*01
	IGKV9-120*01	IGKV14-100*01	IGKV9-120*01	IGKV14-100*01	IGKV9-120*01	IGKV8-30*01	IGKV9-120*01 F	IGKV9-120*01 F	IGKV3-4*01	IGKV9-120*01	IGKV9-120*01	IGKV17-121*01	IGKV14-100*01	IGKV17-121*01	IGKV17-121*01	IGKV14-100*01	IGKV4-70*01	IGKV9-124*01	IGKV9-124*01	IGKV17-121*01
	IGKV9-120*01	IGKV14-100*01	IGKV9-120*01	IGKV14-100*01	IGKV9-120*01	IGKV8-30*01	IGKV9-120*01 F	IGKV9-120*01 F	IGKV14-100*01	IGKV9-120*01	IGKV9-120*01	IGKV17-121*01	IGKV14-100*01	IGKV17-121*01	IGKV17-121*01	IGKV14-100*01	IGKV4-70*01	IGKV9-124*01	IGKV9-124*01	IGKV17-121*01
	IGKV9-120*01	IGKV14-100*01	IGKV9-120*01	IGKV14-100*01	IGKV9-120*01	IGKV8-30*01	IGKV9-120*01 F	IGKV17-121*01 F	IGKV14-100*01	IGKV9-120*01	IGKV9-120*01	IGKV17-121*01	IGKV9-120*01	IGKV17-121*01	IGKV17-121*01	IGKV14-100*01	IGKV4-70*01	IGKV9-124*01	IGKV9-124*01	IGKV17-121*01
	IGKV9-120*01	IGKV14-100*01	IGKV9-120*01	IGKV14-100*01	IGKV9-120*01	IGKV9-120*01	IGKV9-120*01 F	IGKV1-135*01 F	IGKV14-100*01	IGKV9-120*01	IGKV9-120*01	IGKV17-121*01	IGKV14-100*01	IGKV17-121*01	IGKV17-121*01	IGKV14-100*01	IGKV4-70*01	IGKV9-124*01	IGKV9-124*01	IGKV17-121*01
	IGKV9-120*01	IGKV14-100*01	IGKV9-120*01	IGKV14-100*01	IGKV9-120*01	IGKV9-120*01	IGKV9-120*01 F	IGKV9-120*01 F	IGKV14-100*01	IGKV9-120*01	IGKV14-100*01	IGKV17-121*01	IGKV14-100*01	IGKV17-121*01	IGKV4-91*01	IGKV14-100*01	IGKV4-70*01	IGKV9-124*01	IGKV9-124*01	IGKV17-121*01
	IGKV9-120*01	IGKV14-100*01	IGKV9-120*01	IGKV14-100*01	IGKV9-120*01	IGKV8-30*01	IGKV9-120*01 F	IGKV9-120*01 F	IGKV14-100*01	IGKV9-120*01	IGKV14-100*01	IGKV17-121*01	IGKV14-100*01	IGKV17-121*01	IGKV17-121*01	IGKV14-100*01	IGKV4-70*01	IGKV9-124*01	IGKV9-124*01	IGKV17-121*01
	IGKV9-120*01	IGKV14-100*01	IGKV9-120*01	IGKV14-100*01	IGKV9-120*01	IGKV8-30*01	IGKV9-120*01 F	IGKV9-120*01 F	IGKV14-100*01	IGKV9-120*01	IGKV14-100*01	IGKV17-121*01	IGKV9-120*01	IGKV17-121*01	IGKV17-121*01	IGKV14-100*01	IGKV4-70*01	IGKV9-124*01	IGKV9-124*01	IGKV17-121*01
	IGKV9-120*01	IGKV14-100*01	IGKV9-120*01	IGKV14-100*01	IGKV9-120*01	IGKV8-30*01	IGKV9-120*01 F	IGKV9-120*01 F	IGKV14-100*01	IGKV9-120*01	IGKV9-120*01	IGKV17-121*01	IGKV9-120*01	IGKV17-121*01	IGKV17-121*01	IGKV14-100*01	IGKV4-70*01	IGKV9-124*01	IGKV9-124*01	IGKV17-121*01
	IGKV9-120*01	IGKV14-100*01	IGKV9-120*01	IGKV14-100*01	IGKV9-120*01	IGKV8-30*01	IGKV9-120*01 F	IGKV9-120*01 F	IGKV14-100*01	IGKV9-120*01	IGKV9-120*01	IGKV17-121*01	IGKV14-100*01	IGKV17-121*01	IGKV17-121*01	IGKV14-100*01	IGKV4-70*01	IGKV9-124*01	IGKV9-124*01	IGKV17-121*01
	IGKV9-120*01	IGKV14-100*01	IGKV9-120*01	IGKV14-100*01	IGKV9-120*01	IGKV9-120*01	IGKV9-120*01 F	IGKV14-111*01 F	IGKV14-100*01	IGKV9-120*01	IGKV14-100*01	IGKV17-121*01	IGKV14-100*01	IGKV17-121*01	IGKV17-121*01	IGKV14-100*01	IGKV4-70*01	IGKV9-124*01	IGKV9-124*01	IGKV17-121*01
	IGKV9-120*01	IGKV14-100*01	IGKV9-120*01	IGKV14-100*01	IGKV9-120*01	IGKV8-30*01	IGKV9-120*01 F	IGKV14-111*01 F	IGKV14-100*01	IGKV9-120*01	IGKV9-120*01	IGKV17-121*01	IGKV14-100*01	IGKV17-121*01	IGKV4-91*01	IGKV14-100*01	IGKV4-70*01	IGKV9-124*01	IGKV9-124*01	IGKV17-121*01
	IGKV9-120*01	IGKV14-100*01	IGKV9-120*01	IGKV14-100*01	IGKV9-120*01	IGKV8-30*01	IGKV9-120*01 F	IGKV14-111*01 F	IGKV14-100*01	IGKV9-120*01	IGKV14-100*01	IGKV17-121*01	IGKV14-100*01	IGKV17-121*01	IGKV17-121*01	IGKV14-100*01	IGKV4-70*01	IGKV9-124*01	IGKV9-124*01	IGKV17-121*01
	IGKV9-120*01	IGKV14-100*01	IGKV9-120*01	IGKV14-100*01	IGKV9-120*01	IGKV8-30*01	IGKV9-120*01 F	IGKV9-120*01 F	IGKV14-100*01	IGKV9-120*01	IGKV14-100*01	IGKV17-121*01	IGKV14-100*01	IGKV17-121*01	IGKV17-121*01	IGKV14-100*01	IGKV4-70*01	IGKV9-124*01	IGKV9-124*01	IGKV17-121*01
	IGKV9-120*01	IGKV14-100*01	IGKV9-120*01	IGKV14-100*01	IGKV9-120*01	IGKV8-30*01	IGKV9-120*01 F	IGKV14-111*01 F	IGKV14-100*01	IGKV9-120*01	IGKV14-100*01	IGKV17-121*01	IGKV14-100*01	IGKV17-121*01	IGKV17-121*01	IGKV14-100*01	IGKV4-70*01	IGKV9-124*01	IGKV9-124*01	IGKV17-121*01
	IGKV9-120*01	IGKV14-100*01	IGKV9-120*01	IGKV14-100*01	IGKV9-120*01	IGKV8-30*01	IGKV9-120*01 F	IGKV9-120*01 F	IGKV14-100*01	IGKV9-120*01	IGKV14-100*01	IGKV17-121*01	IGKV9-120*01	IGKV17-121*01	IGKV17-121*01	IGKV14-100*01	IGKV4-70*01	IGKV9-124*01	IGKV9-124*01	IGKV17-121*01
	IGKV9-120*01	IGKV14-100*01	IGKV9-120*01	IGKV14-100*01	IGKV9-120*01	IGKV9-120*01	IGKV9-120*01 F	IGKV9-120*01 F	IGKV14-100*01	IGKV9-120*01	IGKV14-100*01	IGKV9-120*01	IGKV9-120*01	IGKV17-121*01	IGKV4-91*01	IGKV14-100*01	IGKV4-70*01	IGKV9-124*01	IGKV9-124*01	IGKV17-121*01
	IGKV9-120*01	IGKV14-100*01	IGKV9-120*01	IGKV14-100*01	IGKV9-120*01	IGKV8-30*01	IGKV9-120*01 F	IGKV9-120*01 F	IGKV14-100*01	IGKV9-120*01	IGKV14-100*01	IGKV17-121*01	IGKV9-120*01	IGKV17-121*01	IGKV17-121*01	IGKV14-100*01	IGKV4-70*01	IGKV9-124*01	IGKV9-124*01	IGKV17-121*01
	IGKV9-120*01	IGKV14-100*01	IGKV9-120*01	IGKV14-100*01	IGKV9-120*01	IGKV8-30*01	IGKV9-120*01 F	IGKV1-135*01 F	IGKV14-100*01	IGKV9-120*01	IGKV9-120*01	IGKV17-121*01	IGKV14-100*01	IGKV17-121*01	IGKV4-91*01	IGKV14-100*01	IGKV4-70*01	IGKV9-124*01	IGKV9-124*01	IGKV17-121*01
	IGKV9-120*01	IGKV14-100*01	IGKV9-120*01	IGKV14-100*01	IGKV9-120*01	IGKV8-30*01	IGKV9-120*01 F	IGKV9-120*01 F	IGKV14-100*01	IGKV9-120*01	IGKV14-100*01	IGKV17-121*01	IGKV14-100*01	IGKV17-121*01	IGKV17-121*01	IGKV14-100*01	IGKV4-70*01	IGKV9-124*01	IGKV9-124*01	IGKV17-121*01
	IGKV9-120*01	IGKV14-100*01	IGKV9-120*01	IGKV14-100*01	IGKV9-120*01	IGKV9-120*01	IGKV9-120*01 F	IGKV14-111*01 F	IGKV14-100*01	IGKV9-120*01	IGKV14-100*01	IGKV17-121*01	IGKV14-100*01	IGKV17-121*01	IGKV4-91*01	IGKV14-100*01	IGKV4-70*01	IGKV9-124*01	IGKV9-124*01	IGKV17-121*01
	IGKV9-120*01	IGKV14-100*01	IGKV9-120*01	IGKV14-100*01	IGKV9-120*01	IGKV8-30*01	IGKV9-120*01 F	IGKV9-120*01 F	IGKV14-100*01	IGKV9-120*01	IGKV14-100*01	IGKV17-121*01	IGKV14-100*01	IGKV17-121*01	IGKV17-121*01	IGKV14-100*01	IGKV4-70*01	IGKV9-124*01	IGKV9-124*01	IGKV17-121*01
	IGKV9-120*01	IGKV14-100*01	IGKV9-120*01	IGKV14-100*01	IGKV9-120*01	IGKV8-30*01	IGKV9-120*01 F	IGKV9-120*01 F	IGKV14-100*01	IGKV9-120*01	IGKV14-100*01	IGKV17-121*01	IGKV9-120*01	IGKV17-121*01	IGKV17-121*01	IGKV14-100*01	IGKV4-70*01	IGKV9-124*01	IGKV9-124*01	IGKV17-121*01
	IGKV9-120*01	IGKV14-100*01	IGKV9-120*01	IGKV14-100*01	IGKV9-120*01	IGKV8-30*01	IGKV9-120*01 F	IGKV9-120*01 F	IGKV14-100*01	IGKV9-120*01	IGKV14-100*01	IGKV17-121*01	IGKV9-120*01	IGKV17-121*01	IGKV4-91*01	IGKV14-100*01	IGKV4-70*01	IGKV9-124*01	IGKV9-124*01	IGKV4-68*01
	IGKV9-120*01	IGKV14-100*01	IGKV9-120*01	IGKV14-100*01	IGKV9-120*01	IGKV8-30*01	IGKV9-120*01 F	IGKV9-120*01 F	IGKV14-100*01	IGKV14-100*01	IGKV9-120*01	IGKV17-121*01	IGKV9-120*01	IGKV17-121*01	IGKV4-91*01	IGKV14-100*01	IGKV4-70*01	IGKV9-124*01	IGKV9-124*01	IGKV17-121*01
	IGKV9-120*01	IGKV14-100*01	IGKV9-120*01	IGKV14-100*01	IGKV9-120*01	IGKV8-30*01	IGKV9-120*01 F	IGKV9-120*01 F	IGKV4-58*01	IGKV9-120*01	IGKV9-120*01	IGKV17-121*01	IGKV9-120*01	IGKV17-121*01	IGKV4-91*01	IGKV14-100*01	IGKV4-70*01	IGKV9-124*01	IGKV9-124*01	IGKV17-121*01
	IGKV9-120*01	IGKV14-100*01	IGKV9-120*01	IGKV14-100*01	IGKV9-120*01	IGKV8-30*01	IGKV9-120*01 F	IGKV9-120*01 F	IGKV14-100*01	IGKV9-120*01	IGKV14-100*01	IGKV17-121*01	IGKV14-100*01	IGKV17-121*01	IGKV17-121*01	IGKV14-100*01	IGKV4-70*01	IGKV9-124*01	IGKV9-124*01	IGKV17-121*01
	IGKV9-120*01	IGKV14-100*01	IGKV9-120*01	IGKV14-100*01	IGKV9-120*01	IGKV8-30*01	IGKV9-120*01 F	IGKV9-120*01 F	IGKV14-100*01	IGKV9-120*01	IGKV14-100*01	IGKV17-121*01	IGKV14-100*01	IGKV17-121*01	IGKV17-121*01	IGKV14-100*01	IGKV4-70*01	IGKV9-124*01	IGKV9-124*01	IGKV17-121*01
	IGKV9-120*01	IGKV14-100*01	IGKV9-120*01	IGKV14-100*01	IGKV9-120*01	IGKV8-30*01	IGKV9-120*01 F	IGKV9-120*01 F	IGKV14-100*01	IGKV9-120*01	IGKV14-100*01	IGKV17-121*01	IGKV14-100*01	IGKV17-121*01	IGKV17-121*01	IGKV14-100*01	IGKV4-70*01	IGKV9-124*01	IGKV9-124*01	IGKV17-121*01
	IGKV9-120*01	IGKV14-100*01	IGKV9-120*01	IGKV14-100*01	IGKV9-120*01	IGKV9-120*01	IGKV9-120*01 F	IGKV9-120*01 F	IGKV14-100*01	IGKV9-120*01	IGKV14-100*01	IGKV17-121*01	IGKV9-120*01	IGKV17-121*01	IGKV17-121*01	IGKV14-100*01	IGKV4-70*01	IGKV9-124*01	IGKV9-124*01	IGKV4-68*01
	IGKV9-120*01	IGKV14-100*01	IGKV9-120*01	IGKV14-100*01	IGKV9-120*01	IGKV8-30*01	IGKV9-120*01 F	IGKV9-120*01 F	IGKV14-100*01	IGKV9-120*01	IGKV14-100*01	IGKV17-121*01	IGKV14-100*01	IGKV17-121*01	IGKV4-91*01	IGKV14-100*01	IGKV4-70*01	IGKV9-124*01	IGKV9-124*01	IGKV17-121*01
	IGKV9-120*01	IGKV14-100*01	IGKV9-120*01	IGKV14-100*01	IGKV9-120*01	IGKV8-30*01	IGKV9-120*01 F	IGKV9-120*01 F	IGKV14-100*01	IGKV9-120*01	IGKV14-100*01	IGKV17-121*01	IGKV9-120*01	IGKV17-121*01	IGKV17-121*01	IGKV14-100*01	IGKV4-70*01	IGKV9-124*01	IGKV9-124*01	IGKV17-121*01
	IGKV9-120*01	IGKV14-100*01	IGKV9-120*01	IGKV14-100*01	IGKV9-120*01	IGKV8-30*01	IGKV9-120*01 F	IGKV9-120*01 F	IGKV14-100*01	IGKV9-120*01	IGKV14-100*01	IGKV17-121*01	IGKV14-100*01	IGKV17-121*01	IGKV4-91*01	IGKV14-100*01	IGKV4-70*01	IGKV9-124*01	IGKV9-124*01	IGKV17-121*01
	IGKV9-120*01	IGKV14-100*01	IGKV9-120*01	IGKV14-100*01	IGKV9-120*01	IGKV9-120*01	IGKV9-120*01 F	IGKV9-120*01 F	IGKV14-100*01	IGKV9-120*01	IGKV14-100*01	IGKV17-121*01	IGKV14-100*01	IGKV17-121*01	IGKV17-121*01	IGKV14-100*01	IGKV4-70*01	IGKV9-124*01	IGKV9-124*01	IGKV17-121*01
	IGKV9-120*01	IGKV14-100*01	IGKV9-120*01	IGKV14-100*01	IGKV9-120*01	IGKV8-30*01	IGKV9-120*01 F	IGKV9-120*01 F	IGKV14-100*01	IGKV9-120*01	IGKV14-100*01	IGKV17-121*01	IGKV9-120*01	IGKV17-121*01	IGKV17-121*01	IGKV14-100*01	IGKV4-70*01	IGKV9-124*01	IGKV9-124*01	IGKV17-121*01
	IGKV9-120*01	IGKV14-100*01	IGKV9-120*01	IGKV14-100*01	IGKV9-120*01	IGKV8-30*01	IGKV9-120*01 F	IGKV14-111*01 F	IGKV14-100*01	IGKV9-120*01	IGKV14-100*01	IGKV17-121*01	IGKV9-120*01	IGKV17-121*01	IGKV17-121*01	IGKV14-100*01	IGKV4-70*01	IGKV9-124*01	IGKV9-124*01	IGKV17-121*01
	IGKV9-120*01	IGKV14-100*01	IGKV9-120*01	IGKV14-100*01	IGKV9-120*01	IGKV9-120*01	IGKV9-120*01 F	IGKV9-120*01 F	IGKV14-100*01	IGKV9-120*01	IGKV9-120*01	IGKV17-121*01	IGKV14-100*01	IGKV17-121*01	IGKV4-91*01	IGKV14-100*01	IGKV4-70*01	IGKV9-124*01	IGKV9-124*01	IGKV17-121*01
	IGKV9-120*01	IGKV14-100*01	IGKV9-120*01	IGKV14-100*01	IGKV9-120*01	IGKV8-30*01	IGKV9-120*01 F	IGKV9-120*01 F	IGKV14-100*01	IGKV9-120*01	IGKV14-100*01	IGKV17-121*01	IGKV9-120*01	IGKV17-121*01	IGKV17-121*01	IGKV14-100*01	IGKV4-70*01	IGKV9-124*01	IGKV9-124*01	IGKV17-121*01
	IGKV9-120*01	IGKV14-100*01	IGKV9-120*01	IGKV14-100*01	IGKV9-120*01	IGKV8-30*01	IGKV9-120*01 F	IGKV9-120*01 F	IGKV14-100*01	IGKV9-120*01	IGKV14-100*01	IGKV17-121*01	IGKV14-100*01	IGKV17-121*01	IGKV17-121*01	IGKV14-100*01	IGKV4-70*01	IGKV9-124*01	IGKV9-124*01	IGKV17-121*01
	IGKV9-120*01	IGKV14-100*01	IGKV9-120*01	IGKV14-100*01	IGKV9-120*01	IGKV8-30*01	IGKV9-120*01 F	IGKV9-120*01 F	IGKV14-100*01	IGKV9-120*01	IGKV14-100*01	IGKV17-121*01	IGKV9-120*01	IGKV17-121*01	IGKV17-121*01	IGKV14-100*01	IGKV4-70*01	IGKV9-124*01	IGKV9-124*01	IGKV17-121*01
	IGKV9-120*01	IGKV14-100*01	IGKV9-120*01	IGKV14-100*01	IGKV9-120*01	IGKV8-30*01	IGKV9-120*01 F	IGKV9-120*01 F	IGKV1-135*01	IGKV9-120*01	IGKV14-100*01	IGKV17-121*01	IGKV14-100*01	IGKV17-121*01	IGKV17-121*01	IGKV14-100*01	IGKV4-70*01	IGKV9-124*01	IGKV9-124*01	IGKV17-121*01
	IGKV9-120*01	IGKV14-100*01	IGKV9-120*01	IGKV14-100*01	IGKV9-120*01	IGKV8-30*01	IGKV9-120*01 F	IGKV14-111*01 F	IGKV14-100*01	IGKV9-120*01	IGKV9-120*01	IGKV17-121*01	IGKV9-120*01	IGKV17-121*01	IGKV17-121*01	IGKV14-100*01	IGKV4-70*01	IGKV9-124*01	IGKV9-124*01	IGKV4-68*01
	IGKV9-120*01	IGKV14-100*01	IGKV9-120*01	IGKV14-100*01	IGKV9-120*01	IGKV8-30*01	IGKV9-120*01 F	IGKV14-111*01 F	IGKV14-100*01	IGKV9-120*01	IGKV14-100*01	IGKV17-121*01	IGKV9-120*01	IGKV17-121*01	IGKV17-121*01	IGKV14-100*01	IGKV4-70*01	IGKV9-124*01	IGKV9-124*01	IGKV17-121*01
	IGKV9-120*01	IGKV14-100*01	IGKV9-120*01	IGKV14-100*01	IGKV9-120*01	IGKV8-30*01	IGKV9-120*01 F	IGKV9-120*01 F	IGKV14-100*01	IGKV9-120*01	IGKV14-100*01	IGKV17-121*01	IGKV14-100*01	IGKV17-121*01	IGKV17-121*01	IGKV14-100*01	IGKV4-70*01	IGKV9-124*01	IGKV9-124*01	IGKV17-121*01
	IGKV9-120*01	IGKV14-100*01	IGKV9-120*01	IGKV14-100*01	IGKV9-120*01	IGKV9-120*01	IGKV9-120*01 F	IGKV9-120*01 F	IGKV1-135*01	IGKV9-120*01	IGKV14-100*01	IGKV17-121*01	IGKV14-100*01	IGKV17-121*01	IGKV17-121*01	IGKV14-100*01	IGKV4-70*01	IGKV9-124*01	IGKV9-124*01	IGKV17-121*01
	IGKV9-120*01	IGKV14-100*01	IGKV9-120*01	IGKV14-100*01	IGKV9-120*01	IGKV8-30*01	IGKV9-120*01 F	IGKV9-120*01 F	IGKV14-100*01	IGKV9-120*01	IGKV9-120*01	IGKV17-121*01	IGKV14-100*01	IGKV17-121*01	IGKV17-121*01	IGKV14-100*01	IGKV4-70*01	IGKV9-124*01	IGKV9-124*01	IGKV17-121*01
	IGKV9-120*01	IGKV14-100*01	IGKV9-120*01	IGKV14-100*01	IGKV9-120*01	IGKV8-30*01	IGKV9-120*01 F	IGKV9-120*01 F	IGKV14-100*01	IGKV9-120*01	IGKV14-100*01	IGKV17-121*01	IGKV14-100*01	IGKV17-121*01	IGKV4-91*01	IGKV14-100*01	IGKV4-70*01	IGKV9-124*01	IGKV9-124*01	IGKV17-121*01
	IGKV9-120*01	IGKV14-100*01	IGKV9-120*01	IGKV14-100*01	IGKV9-120*01	IGKV8-30*01	IGKV9-120*01 F	IGKV9-120*01 F	IGKV14-100*01	IGKV9-120*01	IGKV14-100*01	IGKV17-121*01	IGKV14-100*01	IGKV17-121*01	IGKV17-121*01	IGKV14-100*01	IGKV4-70*01	IGKV9-124*01	IGKV9-124*01	IGKV17-121*01
	IGKV9-120*01	IGKV14-100*01	IGKV9-120*01	IGKV14-100*01	IGKV9-120*01	IGKV9-120*01	IGKV9-120*01 F	IGKV9-120*01 F	IGKV14-100*01	IGKV9-120*01	IGKV9-120*01	IGKV17-121*01	IGKV14-100*01	IGKV17-121*01	IGKV17-121*01	IGKV14-100*01	IGKV4-70*01	IGKV9-124*01	IGKV9-124*01	IGKV17-121*01
	IGKV9-120*01	IGKV14-100*01	IGKV9-120*01	IGKV14-100*01	IGKV9-120*01	IGKV8-30*01	IGKV9-120*01 F	IGKV9-120*01 F	IGKV14-100*01	IGKV9-120*01	IGKV14-100*01	IGKV17-121*01	IGKV14-100*01	IGKV17-121*01	IGKV17-121*01	IGKV14-100*01	IGKV4-70*01	IGKV9-124*01	IGKV9-124*01	IGKV17-121*01
	IGKV9-120*01	IGKV14-100*01	IGKV9-120*01	IGKV14-100*01	IGKV9-120*01	IGKV8-30*01	IGKV9-120*01 F	IGKV9-120*01 F	IGKV14-100*01	IGKV9-120*01	IGKV9-120*01	IGKV17-121*01	IGKV14-100*01	IGKV17-121*01	IGKV17-121*01	IGKV14-100*01	IGKV4-70*01	IGKV9-124*01	IGKV9-124*01	IGKV17-121*01
	IGKV9-120*01	IGKV14-100*01	IGKV9-120*01	IGKV14-100*01	IGKV9-120*01	IGKV9-120*01	IGKV9-120*01 F	IGKV14-111*01 F	IGKV14-100*01	IGKV9-120*01	IGKV14-100*01	IGKV17-121*01	IGKV14-100*01	IGKV17-121*01	IGKV17-121*01	IGKV14-100*01	IGKV4-70*01	IGKV9-124*01	IGKV9-124*01	IGKV17-121*01
	IGKV9-120*01	IGKV14-100*01	IGKV9-120*01	IGKV14-100*01	IGKV9-120*01	IGKV8-30*01	IGKV9-120*01 F	IGKV14-111*01 F	IGKV14-100*01	IGKV9-120*01	IGKV14-100*01	IGKV17-121*01	IGKV14-100*01	IGKV17-121*01	IGKV4-91*01	IGKV14-100*01	IGKV4-70*01	IGKV9-124*01	IGKV9-124*01	IGKV17-121*01
	IGKV9-120*01	IGKV14-100*01	IGKV9-120*01	IGKV14-100*01	IGKV9-120*01	IGKV8-30*01	IGKV9-120*01 F	IGKV14-111*01 F	IGKV14-100*01	IGKV9-120*01	IGKV9-120*01	IGKV17-121*01	IGKV9-120*01	IGKV17-121*01	IGKV4-91*01	IGKV14-100*01	IGKV4-70*01	IGKV9-124*01	IGKV9-124*01	IGKV17-121*01
	IGKV9-120*01	IGKV14-100*01	IGKV9-120*01	IGKV14-100*01	IGKV9-120*01	IGKV8-30*01	IGKV9-120*01 F	IGKV9-120*01 F	IGKV14-100*01	IGKV9-120*01	IGKV14-100*01	IGKV17-121*01	IGKV14-100*01	IGKV17-121*01	IGKV17-121*01	IGKV14-100*01	IGKV4-70*01	IGKV9-124*01	IGKV9-124*01	IGKV17-121*01
	IGKV9-120*01	IGKV14-100*01	IGKV9-120*01	IGKV14-100*01	IGKV9-120*01	IGKV8-30*01	IGKV9-120*01 F	IGKV9-120*01 F	IGKV14-100*01	IGKV9-120*01	IGKV9-120*01	IGKV17-121*01	IGKV14-100*01	IGKV17-121*01	IGKV17-121*01	IGKV14-100*01	IGKV4-70*01	IGKV9-124*01	IGKV9-124*01	IGKV17-121*01
	IGKV9-120*01	IGKV14-100*01	IGKV9-120*01	IGKV14-100*01	IGKV9-120*01	IGKV8-30*01	IGKV9-120*01 F	IGKV9-120*01 F	IGKV14-100*01	IGKV9-120*01	IGKV9-120*01	IGKV17-121*01	IGKV14-100*01	IGKV17-121*01	IGKV17-121*01	IGKV14-100*01	IGKV4-70*01	IGKV9-124*01	IGKV9-124*01	IGKV17-121*01
	IGKV9-120*01	IGKV14-100*01	IGKV9-120*01	IGKV14-100*01	IGKV9-120*01	IGKV8-30*01	IGKV9-120*01 F	IGKV9-120*01 F	IGKV14-100*01	IGKV9-120*01	IGKV14-100*01	IGKV17-121*01	IGKV9-120*01	IGKV17-121*01	IGKV17-121*01	IGKV14-100*01	IGKV4-70*01	IGKV9-124*01	IGKV9-124*01	IGKV17-121*01
	IGKV9-120*01	IGKV14-100*01	IGKV9-120*01	IGKV14-100*01	IGKV9-120*01	IGKV8-30*01	IGKV9-120*01 F	IGKV9-120*01 F	IGKV14-100*01	IGKV9-120*01	IGKV14-100*01	IGKV17-121*01	IGKV9-120*01	IGKV17-121*01	IGKV17-121*01	IGKV14-100*01	IGKV4-70*01	IGKV9-124*01	IGKV9-124*01	IGKV17-121*01
	IGKV9-120*01	IGKV14-100*01	IGKV9-120*01	IGKV14-100*01	IGKV9-120*01	IGKV8-30*01	IGKV9-120*01 F	IGKV9-120*01 F	IGKV1-135*01	IGKV9-120*01	IGKV14-100*01	IGKV17-121*01	IGKV14-100*01	IGKV17-121*01	IGKV17-121*01	IGKV14-100*01	IGKV4-70*01	IGKV9-124*01	IGKV9-124*01	IGKV17-121*01
	IGKV9-120*01	IGKV14-100*01	IGKV9-120*01	IGKV14-100*01	IGKV9-120*01	IGKV9-120*01	IGKV9-120*01 F	IGKV9-120*01 F	IGKV14-100*01	IGKV9-120*01	IGKV9-120*01	IGKV17-121*01	IGKV14-100*01	IGKV17-121*01	IGKV17-121*01	IGKV14-100*01	IGKV4-70*01	IGKV9-124*01	IGKV9-124*01	IGKV17-121*01
	IGKV9-120*01	IGKV14-100*01	IGKV9-120*01	IGKV14-100*01	IGKV9-120*01	IGKV8-30*01	IGKV9-120*01 F	IGKV14-111*01 F	IGKV14-100*01	IGKV9-120*01	IGKV14-100*01	IGKV17-121*01	IGKV14-100*01	IGKV17-121*01	IGKV17-121*01	IGKV14-100*01	IGKV4-70*01	IGKV9-124*01	IGKV9-124*01	IGKV17-121*01
	IGKV9-120*01	IGKV14-100*01	IGKV9-120*01	IGKV14-100*01	IGKV9-120*01	IGKV8-30*01	IGKV9-120*01 F	IGKV14-111*01 F	IGKV14-100*01	IGKV9-120*01	IGKV14-100*01	IGKV17-121*01	IGKV14-100*01	IGKV17-121*01	IGKV17-121*01	IGKV14-100*01	IGKV4-70*01	IGKV9-124*01	IGKV9-124*01	IGKV17-121*01
	IGKV9-120*01	IGKV14-100*01	IGKV9-120*01	IGKV14-100*01	IGKV9-120*01	IGKV8-30*01	IGKV9-120*01 F	IGKV9-120*01 F	IGKV1-135*01	IGKV9-120*01	IGKV14-100*01	IGKV17-121*01	IGKV14-100*01	IGKV17-121*01	IGKV17-121*01	IGKV14-100*01	IGKV4-70*01	IGKV9-124*01	IGKV9-124*01	IGKV17-121*01
	IGKV9-120*01	IGKV14-100*01	IGKV9-120*01	IGKV14-100*01	IGKV9-120*01	IGKV8-30*01	IGKV9-120*01 F	IGKV9-120*01 F	IGKV14-100*01	IGKV9-120*01	IGKV14-100*01	IGKV17-121*01	IGKV14-100*01	IGKV17-121*01	IGKV4-91*01	IGKV14-100*01	IGKV4-70*01	IGKV9-124*01	IGKV9-124*01	IGKV17-121*01
	IGKV9-120*01	IGKV14-100*01	IGKV9-120*01	IGKV14-100*01	IGKV9-120*01	IGKV8-30*01	IGKV9-120*01 F	IGKV14-111*01 F	IGKV14-100*01	IGKV9-120*01	IGKV9-120*01	IGKV17-121*01	IGKV14-100*01	IGKV17-121*01	IGKV17-121*01	IGKV14-100*01	IGKV4-70*01	IGKV9-124*01	IGKV9-124*01	IGKV17-121*01
	IGKV9-120*01	IGKV14-100*01	IGKV9-120*01	IGKV14-100*01	IGKV9-120*01	IGKV8-30*01	IGKV9-120*01 F	IGKV14-111*01 F	IGKV14-100*01	IGKV9-120*01	IGKV14-100*01	IGKV17-121*01	IGKV9-120*01	IGKV17-121*01	IGKV4-91*01	IGKV14-100*01	IGKV4-70*01	IGKV9-124*01	IGKV9-124*01	IGKV17-121*01
	IGKV9-120*01	IGKV14-100*01	IGKV9-120*01	IGKV14-100*01	IGKV9-120*01	IGKV8-30*01	IGKV9-120*01 F	IGKV9-120*01 F	IGKV14-100*01	IGKV9-120*01	IGKV14-100*01	IGKV17-121*01	IGKV14-100*01	IGKV17-121*01	IGKV4-91*01	IGKV14-100*01	IGKV4-70*01	IGKV9-124*01	IGKV9-124*01	IGKV17-121*01
	IGKV9-120*01	IGKV14-100*01	IGKV9-120*01	IGKV14-100*01	IGKV9-120*01	IGKV8-30*01	IGKV9-120*01 F	IGKV9-120*01 F	IGKV14-100*01	IGKV9-120*01	IGKV9-120*01	IGKV17-121*01	IGKV14-100*01	IGKV17-121*01	IGKV4-91*01	IGKV14-100*01	IGKV4-70*01	IGKV9-124*01	IGKV9-124*01	IGKV17-121*01
	IGKV9-120*01	IGKV14-100*01	IGKV9-120*01	IGKV14-100*01	IGKV9-120*01	IGKV9-120*01	IGKV9-120*01 F	IGKV14-111*01 F	IGKV14-100*01	IGKV9-120*01	IGKV9-120*01	IGKV17-121*01	IGKV14-100*01	IGKV17-121*01	IGKV17-121*01	IGKV14-100*01	IGKV4-70*01	IGKV9-124*01	IGKV9-124*01	IGKV17-121*01
	IGKV9-120*01	IGKV14-100*01	IGKV9-120*01	IGKV14-100*01	IGKV9-120*01	IGKV8-30*01	IGKV9-120*01 F	IGKV9-120*01 F	IGKV14-100*01	IGKV9-120*01	IGKV9-120*01	IGKV17-121*01	IGKV14-100*01	IGKV17-121*01	IGKV17-121*01	IGKV14-100*01	IGKV4-70*01	IGKV9-124*01	IGKV9-124*01	IGKV17-121*01
	IGKV9-120*01	IGKV14-100*01	IGKV9-120*01	IGKV14-100*01	IGKV9-120*01	IGKV8-30*01	IGKV9-120*01 F	IGKV14-111*01 F	IGKV14-100*01	IGKV9-120*01	IGKV9-120*01	IGKV17-121*01	IGKV14-100*01	IGKV17-121*01	IGKV17-121*01	IGKV14-100*01	IGKV4-70*01	IGKV9-124*01	IGKV9-124*01	IGKV17-121*01
	IGKV9-120*01	IGKV14-100*01	IGKV9-120*01	IGKV14-100*01	IGKV9-120*01	IGKV8-30*01	IGKV9-120*01 F	IGKV9-120*01 F	IGKV14-100*01	IGKV9-120*01	IGKV9-120*01	IGKV17-121*01	IGKV14-100*01	IGKV17-121*01	IGKV17-121*01	IGKV14-100*01	IGKV4-70*01	IGKV9-124*01	IGKV9-124*01	IGKV17-121*01
	IGKV9-120*01	IGKV14-100*01	IGKV9-120*01	IGKV14-100*01	IGKV9-120*01	IGKV8-30*01	IGKV9-120*01 F	IGKV9-120*01 F	IGKV17-121*01	IGKV9-120*01	IGKV9-120*01	IGKV17-121*01	IGKV14-100*01	IGKV17-121*01	IGKV17-121*01	IGKV14-100*01	IGKV4-70*01	IGKV9-124*01	IGKV9-124*01	IGKV17-121*01
	IGKV9-120*01	IGKV14-100*01	IGKV9-120*01	IGKV14-100*01	IGKV9-120*01	IGKV8-30*01	IGKV9-120*01 F	IGKV9-120*01 F	IGKV14-100*01	IGKV9-120*01	IGKV14-100*01	IGKV17-121*01	IGKV14-100*01	IGKV17-121*01	IGKV17-121*01	IGKV14-100*01	IGKV4-70*01	IGKV9-124*01	IGKV9-124*01	IGKV17-121*01
	IGKV9-120*01	IGKV14-100*01	IGKV9-120*01	IGKV14-100*01	IGKV9-120*01	IGKV8-30*01	IGKV9-120*01 F	IGKV9-120*01 F	IGKV14-100*01	IGKV9-120*01	IGKV14-100*01	IGKV17-121*01	IGKV14-100*01	IGKV17-121*01	IGKV17-121*01	IGKV14-100*01	IGKV4-70*01	IGKV9-124*01	IGKV9-124*01	IGKV17-121*01
	IGKV9-120*01	IGKV14-100*01	IGKV9-120*01	IGKV14-100*01	IGKV9-120*01	IGKV8-30*01	IGKV9-120*01 F	IGKV9-120*01 F	IGKV14-100*01	IGKV9-120*01	IGKV14-100*01	IGKV17-121*01	IGKV14-100*01	IGKV17-121*01	IGKV17-121*01	IGKV14-100*01	IGKV4-70*01	IGKV9-124*01	IGKV9-124*01	IGKV17-121*01
	IGKV9-120*01	IGKV14-100*01	IGKV9-120*01	IGKV14-100*01	IGKV9-120*01	IGKV8-30*01	IGKV9-120*01 F	IGKV9-120*01 F	IGKV14-100*01	IGKV9-120*01	IGKV14-100*01	IGKV17-121*01	IGKV14-100*01	IGKV17-121*01	IGKV17-121*01	IGKV14-100*01	IGKV4-70*01	IGKV9-124*01	IGKV9-124*01	IGKV17-121*01
	IGKV9-120*01	IGKV14-100*01	IGKV9-120*01	IGKV14-100*01	IGKV9-120*01	IGKV8-30*01	IGKV9-120*01 F	IGKV9-120*01 F	IGKV14-100*01	IGKV9-120*01	IGKV14-100*01	IGKV17-121*01	IGKV14-100*01	IGKV17-121*01	IGKV4-91*01	IGKV14-100*01	IGKV4-70*01	IGKV9-124*01	IGKV9-124*01	IGKV17-121*01
	IGKV9-120*01	IGKV14-100*01	IGKV9-120*01	IGKV14-100*01	IGKV9-120*01	IGKV8-30*01	IGKV9-120*01 F	IGKV9-120*01 F	IGKV14-100*01	IGKV9-120*01	IGKV9-120*01	IGKV17-121*01	IGKV14-100*01	IGKV17-121*01	IGKV4-91*01	IGKV14-100*01	IGKV4-70*01	IGKV9-124*01	IGKV9-124*01	IGKV17-121*01
	IGKV9-120*01	IGKV14-100*01	IGKV9-120*01	IGKV14-100*01	IGKV9-120*01	IGKV8-30*01	IGKV9-120*01 F	IGKV9-120*01 F	IGKV14-100*01	IGKV9-120*01	IGKV9-120*01	IGKV17-121*01	IGKV9-120*01	IGKV17-121*01	IGKV17-121*01	IGKV14-100*01	IGKV4-70*01	IGKV9-124*01	IGKV9-124*01	IGKV17-121*01
	IGKV9-120*01	IGKV14-100*01	IGKV9-120*01	IGKV14-100*01	IGKV9-120*01	IGKV8-30*01	IGKV9-120*01 F	IGKV9-120*01 F	IGKV14-100*01	IGKV9-120*01	IGKV9-120*01	IGKV17-121*01	IGKV14-100*01	IGKV17-121*01	IGKV17-121*01	IGKV14-100*01	IGKV4-70*01	IGKV9-124*01	IGKV9-124*01	IGKV17-121*01
	IGKV9-120*01	IGKV14-100*01	IGKV9-120*01	IGKV14-100*01	IGKV9-120*01	IGKV8-30*01	IGKV9-120*01 F	IGKV9-120*01 F	IGKV14-100*01	IGKV9-120*01	IGKV14-100*01	IGKV17-121*01	IGKV14-100*01	IGKV17-121*01	IGKV17-121*01	IGKV14-100*01	IGKV4-70*01	IGKV9-124*01	IGKV9-124*01	IGKV17-121*01
	IGKV9-120*01	IGKV14-100*01	IGKV9-120*01	IGKV14-100*01	IGKV9-120*01	IGKV9-120*01	IGKV9-120*01 F	IGKV9-120*01 F	IGKV14-100*01	IGKV9-120*01	IGKV14-100*01	IGKV17-121*01	IGKV14-100*01	IGKV17-121*01	IGKV17-121*01	IGKV14-100*01	IGKV4-70*01	IGKV9-124*01	IGKV9-124*01	IGKV17-121*01
	IGKV9-120*01	IGKV14-100*01	IGKV9-120*01	IGKV14-100*01	IGKV9-120*01	IGKV9-120*01	IGKV9-120*01 F	IGKV9-120*01 F	IGKV14-100*01	IGKV9-120*01	IGKV14-100*01	IGKV17-121*01	IGKV14-100*01	IGKV17-121*01	IGKV17-121*01	IGKV14-100*01	IGKV4-70*01	IGKV9-124*01	IGKV9-124*01	IGKV17-121*01
	IGKV9-120*01	IGKV14-100*01	IGKV9-120*01	IGKV14-100*01	IGKV9-120*01	IGKV8-30*01	IGKV9-120*01 F	IGKV9-120*01 F	IGKV14-100*01	IGKV9-120*01	IGKV9-120*01	IGKV17-121*01	IGKV14-100*01	IGKV17-121*01	IGKV4-91*01	IGKV14-100*01	IGKV4-70*01	IGKV9-124*01	IGKV9-124*01	IGKV17-121*01
	IGKV9-120*01	IGKV14-100*01	IGKV9-120*01	IGKV14-100*01	IGKV9-120*01	IGKV8-30*01	IGKV9-120*01 F	IGKV9-120*01 F	IGKV14-100*01	IGKV9-120*01	IGKV14-100*01	IGKV17-121*01	IGKV14-100*01	IGKV17-121*01	IGKV17-121*01	IGKV14-100*01	IGKV4-70*01	IGKV9-124*01	IGKV9-124*01	IGKV17-121*01
	IGKV9-120*01	IGKV14-100*01	IGKV9-120*01	IGKV14-100*01	IGKV9-120*01	IGKV8-30*01	IGKV9-120*01 F	IGKV9-120*01 F	IGKV14-100*01	IGKV9-120*01	IGKV14-100*01	IGKV17-121*01	IGKV14-100*01	IGKV17-121*01	IGKV4-91*01	IGKV14-100*01	IGKV4-70*01	IGKV9-124*01	IGKV9-124*01	IGKV17-121*01
	IGKV9-120*01	IGKV14-100*01	IGKV9-120*01	IGKV14-100*01	IGKV9-120*01	IGKV9-120*01	IGKV9-120*01 F	IGKV9-120*01 F	IGKV17-121*01	IGKV9-120*01	IGKV14-100*01	IGKV17-121*01	IGKV9-120*01	IGKV17-121*01	IGKV17-121*01	IGKV14-100*01	IGKV4-70*01	IGKV9-124*01	IGKV9-124*01	IGKV17-121*01
	IGKV9-120*01	IGKV14-100*01	IGKV9-120*01	IGKV14-100*01	IGKV9-120*01	IGKV8-30*01	IGKV9-120*01 F	IGKV9-120*01 F	IGKV14-100*01	IGKV9-120*01	IGKV14-100*01	IGKV17-121*01	IGKV14-100*01	IGKV17-121*01	IGKV4-91*01	IGKV14-100*01	IGKV4-70*01	IGKV9-124*01	IGKV9-124*01	IGKV17-121*01
	IGKV9-120*01	IGKV14-100*01	IGKV9-120*01	IGKV14-100*01	IGKV9-120*01	IGKV8-30*01	IGKV9-120*01 F	IGKV9-120*01 F	IGKV14-100*01	IGKV9-120*01	IGKV14-100*01	IGKV17-121*01	IGKV14-100*01	IGKV17-121*01	IGKV4-91*01	IGKV14-100*01	IGKV4-70*01	IGKV9-124*01	IGKV9-124*01	IGKV17-121*01
	IGKV9-120*01	IGKV14-100*01	IGKV9-120*01	IGKV14-100*01	IGKV9-120*01	IGKV8-30*01	IGKV9-120*01 F	IGKV17-121*01 F	IGKV14-100*01	IGKV9-120*01	IGKV14-100*01	IGKV17-121*01	IGKV9-120*01	IGKV17-121*01	IGKV4-91*01	IGKV14-100*01	IGKV4-70*01	IGKV9-124*01	IGKV9-124*01	IGKV17-121*01
	IGKV9-120*01	IGKV14-100*01	IGKV9-120*01	IGKV14-100*01	IGKV9-120*01	IGKV8-30*01	IGKV9-120*01 F	IGKV9-120*01 F	IGKV14-100*01	IGKV9-120*01	IGKV9-120*01	IGKV17-121*01	IGKV14-100*01	IGKV17-121*01	IGKV4-91*01	IGKV14-100*01	IGKV4-70*01	IGKV9-124*01	IGKV9-124*01	IGKV17-121*01
	IGKV9-120*01	IGKV14-100*01	IGKV9-120*01	IGKV14-100*01	IGKV9-120*01	IGKV9-120*01	IGKV9-120*01 F	IGKV14-111*01 F	IGKV14-100*01	IGKV9-120*01	IGKV9-120*01	IGKV17-121*01	IGKV14-100*01	IGKV17-121*01	IGKV4-91*01	IGKV14-100*01	IGKV4-70*01	IGKV9-124*01	IGKV9-124*01	IGKV17-121*01
	IGKV9-120*01	IGKV14-100*01	IGKV9-120*01	IGKV14-100*01	IGKV9-120*01	IGKV9-120*01	IGKV9-120*01 F	IGKV9-120*01 F	IGKV14-100*01	IGKV9-120*01	IGKV14-100*01	IGKV17-121*01	IGKV14-100*01	IGKV17-121*01	IGKV17-121*01	IGKV14-100*01	IGKV4-70*01	IGKV9-124*01	IGKV9-124*01	IGKV17-121*01
	IGKV9-120*01	IGKV14-100*01	IGKV9-120*01	IGKV14-100*01	IGKV9-120*01	IGKV9-120*01	IGKV9-120*01 F	IGKV9-120*01 F	IGKV14-100*01	IGKV9-120*01	IGKV14-100*01	IGKV17-121*01	IGKV9-120*01	IGKV17-121*01	IGKV17-121*01	IGKV14-100*01	IGKV4-70*01	IGKV9-124*01	IGKV9-124*01	IGKV17-121*01
	IGKV9-120*01	IGKV14-100*01	IGKV9-120*01	IGKV14-100*01	IGKV9-120*01	IGKV9-120*01	IGKV9-120*01 F	IGKV9-120*01 F	IGKV14-100*01	IGKV9-120*01	IGKV9-120*01	IGKV17-121*01	IGKV14-100*01	IGKV17-121*01	IGKV17-121*01	IGKV14-100*01	IGKV4-70*01	IGKV9-124*01	IGKV9-124*01	IGKV17-121*01
	IGKV9-120*01	IGKV14-100*01	IGKV9-120*01	IGKV14-100*01	IGKV9-120*01	IGKV8-30*01	IGKV9-120*01 F	IGKV14-111*01 F	IGKV14-100*01	IGKV9-120*01	IGKV14-100*01	IGKV17-121*01	IGKV14-100*01	IGKV17-121*01	IGKV17-121*01	IGKV14-100*01	IGKV4-70*01	IGKV9-124*01	IGKV9-124*01	IGKV17-121*01
	IGKV9-120*01	IGKV14-100*01	IGKV9-120*01	IGKV14-100*01	IGKV9-120*01	IGKV8-30*01	IGKV9-120*01 F	IGKV9-120*01 F	IGKV14-100*01	IGKV9-120*01	IGKV14-100*01	IGKV17-121*01	IGKV14-100*01	IGKV17-121*01	IGKV17-121*01	IGKV14-100*01	IGKV4-70*01	IGKV9-124*01	IGKV9-124*01	IGKV17-121*01
	IGKV9-120*01	IGKV14-100*01	IGKV9-120*01	IGKV14-100*01	IGKV9-120*01	IGKV8-30*01	IGKV9-120*01 F	IGKV1-117*01 F	IGKV14-100*01	IGKV9-120*01	IGKV14-100*01	IGKV17-121*01	IGKV14-100*01	IGKV17-121*01	IGKV17-121*01	IGKV14-100*01	IGKV4-70*01	IGKV9-124*01	IGKV9-124*01	IGKV17-121*01
	IGKV9-120*01	IGKV14-100*01	IGKV9-120*01	IGKV14-100*01	IGKV9-120*01	IGKV8-30*01	IGKV9-120*01 F	IGKV9-120*01 F	IGKV14-100*01	IGKV9-120*01	IGKV14-100*01	IGKV17-121*01	IGKV9-120*01	IGKV17-121*01	IGKV4-91*01	IGKV14-100*01	IGKV4-70*01	IGKV9-124*01	IGKV9-124*01	IGKV17-121*01
	IGKV9-120*01	IGKV14-100*01	IGKV9-120*01	IGKV14-100*01	IGKV9-120*01	IGKV9-120*01	IGKV9-120*01 F	IGKV1-135*01 F	IGKV14-100*01	IGKV9-120*01	IGKV14-100*01	IGKV17-121*01	IGKV14-100*01	IGKV17-121*01	IGKV17-121*01	IGKV14-100*01	IGKV4-70*01	IGKV9-124*01	IGKV9-124*01	IGKV17-121*01
	IGKV9-120*01	IGKV14-100*01	IGKV9-120*01	IGKV14-100*01	IGKV9-120*01	IGKV8-30*01	IGKV9-120*01 F	IGKV9-120*01 F	IGKV1-135*01	IGKV9-120*01	IGKV9-120*01	IGKV17-121*01	IGKV14-100*01	IGKV17-121*01	IGKV17-121*01	IGKV14-100*01	IGKV4-70*01	IGKV9-124*01	IGKV9-124*01	IGKV17-121*01
	IGKV9-120*01	IGKV14-100*01	IGKV9-120*01	IGKV14-100*01	IGKV9-120*01	IGKV8-30*01	IGKV9-120*01 F	IGKV9-120*01 F	IGKV14-100*01	IGKV9-120*01	IGKV9-120*01	IGKV17-121*01	IGKV14-100*01	IGKV17-121*01	IGKV4-91*01	IGKV14-100*01	IGKV4-70*01	IGKV9-124*01	IGKV9-124*01	IGKV17-121*01
	IGKV9-120*01	IGKV14-100*01	IGKV9-120*01	IGKV14-100*01	IGKV9-120*01	IGKV9-120*01	IGKV9-120*01 F	IGKV9-120*01 F	IGKV14-100*01	IGKV9-120*01	IGKV9-120*01	IGKV17-121*01	IGKV14-100*01	IGKV17-121*01	IGKV17-121*01	IGKV14-100*01	IGKV4-70*01	IGKV9-124*01	IGKV9-124*01	IGKV17-121*01
	IGKV9-120*01	IGKV14-100*01	IGKV9-120*01	IGKV14-100*01	IGKV9-120*01	IGKV9-120*01	IGKV9-120*01 F	IGKV9-120*01 F	IGKV14-100*01	IGKV9-120*01	IGKV9-120*01	IGKV17-121*01	IGKV14-100*01	IGKV17-121*01	IGKV4-91*01	IGKV14-100*01	IGKV4-70*01	IGKV9-124*01	IGKV9-124*01	IGKV17-121*01
	IGKV9-120*01	IGKV14-100*01	IGKV9-120*01	IGKV14-100*01	IGKV9-120*01	IGKV8-30*01	IGKV9-120*01 F	IGKV9-120*01 F	IGKV1-135*01	IGKV9-120*01	IGKV9-120*01	IGKV17-121*01	IGKV9-120*01	IGKV17-121*01	IGKV4-91*01	IGKV14-100*01	IGKV4-70*01	IGKV9-124*01	IGKV9-124*01	IGKV17-121*01
	IGKV9-120*01	IGKV14-100*01	IGKV9-120*01	IGKV14-100*01	IGKV9-120*01	IGKV8-30*01	IGKV9-120*01 F	IGKV9-120*01 F	IGKV14-100*01	IGKV9-120*01	IGKV14-100*01	IGKV17-121*01	IGKV14-100*01	IGKV17-121*01	IGKV17-121*01	IGKV14-100*01	IGKV4-70*01	IGKV9-124*01	IGKV9-124*01	IGKV17-121*01
	IGKV9-120*01	IGKV14-100*01	IGKV9-120*01	IGKV14-100*01	IGKV9-120*01	IGKV8-30*01	IGKV9-120*01 F	IGKV17-121*01 F	IGKV14-100*01	IGKV9-120*01	IGKV14-100*01	IGKV17-121*01	IGKV14-100*01	IGKV17-121*01	IGKV17-121*01	IGKV14-100*01	IGKV4-70*01	IGKV9-124*01	IGKV9-124*01	IGKV17-121*01
	IGKV9-120*01	IGKV14-100*01	IGKV9-120*01	IGKV14-100*01	IGKV9-120*01	IGKV8-30*01	IGKV9-120*01 F	IGKV9-120*01 F	IGKV14-100*01	IGKV9-120*01	IGKV9-120*01	IGKV17-121*01	IGKV14-100*01	IGKV17-121*01	IGKV17-121*01	IGKV14-100*01	IGKV4-70*01	IGKV9-124*01	IGKV9-124*01	IGKV17-121*01
	IGKV9-120*01	IGKV14-100*01	IGKV9-120*01	IGKV14-100*01	IGKV9-120*01	IGKV8-30*01	IGKV9-120*01 F	IGKV9-120*01 F	IGKV14-100*01	IGKV9-120*01	IGKV9-120*01	IGKV17-121*01	IGKV14-100*01	IGKV17-121*01	IGKV17-121*01	IGKV14-100*01	IGKV4-70*01	IGKV9-124*01	IGKV9-124*01	IGKV17-121*01
	IGKV9-120*01	IGKV14-100*01	IGKV9-120*01	IGKV14-100*01	IGKV9-120*01	IGKV9-120*01	IGKV9-120*01 F	IGKV9-120*01 F	IGKV14-100*01	IGKV9-120*01	IGKV14-100*01	IGKV17-121*01	IGKV9-120*01	IGKV17-121*01	IGKV4-91*01	IGKV14-100*01	IGKV4-70*01	IGKV9-124*01	IGKV9-124*01	IGKV17-121*01
	IGKV9-120*01	IGKV14-100*01	IGKV9-120*01	IGKV14-100*01	IGKV9-120*01	IGKV8-30*01	IGKV9-120*01 F	IGKV17-121*01 F	IGKV14-100*01	IGKV9-120*01	IGKV14-100*01	IGKV17-121*01	IGKV9-120*01	IGKV17-121*01	IGKV17-121*01	IGKV14-100*01	IGKV4-70*01	IGKV9-124*01	IGKV9-124*01	IGKV17-121*01
	IGKV9-120*01	IGKV14-100*01	IGKV9-120*01	IGKV14-100*01	IGKV9-120*01	IGKV8-30*01	IGKV9-120*01 F	IGKV9-120*01 F	IGKV14-100*01	IGKV9-120*01	IGKV14-100*01	IGKV17-121*01	IGKV14-100*01	IGKV17-121*01	IGKV17-121*01	IGKV14-100*01	IGKV4-70*01	IGKV9-124*01	IGKV9-124*01	IGKV17-121*01
	IGKV9-120*01	IGKV14-100*01	IGKV9-120*01	IGKV14-100*01	IGKV9-120*01	IGKV8-30*01	IGKV9-120*01 F	IGKV9-120*01 F	IGKV14-100*01	IGKV9-120*01	IGKV14-100*01	IGKV17-121*01	IGKV14-100*01	IGKV17-121*01	IGKV17-121*01	IGKV14-100*01	IGKV4-70*01	IGKV9-124*01	IGKV9-124*01	IGKV17-121*01
	IGKV9-120*01	IGKV14-100*01	IGKV9-120*01	IGKV14-100*01	IGKV9-120*01	IGKV8-30*01	IGKV9-120*01 F	IGKV9-120*01 F	IGKV1-135*01	IGKV9-120*01	IGKV14-100*01	IGKV17-121*01	IGKV9-120*01	IGKV17-121*01	IGKV17-121*01	IGKV14-100*01	IGKV4-70*01	IGKV9-124*01	IGKV9-124*01	IGKV17-121*01
	IGKV9-120*01	IGKV14-100*01	IGKV9-120*01	IGKV14-100*01	IGKV9-120*01	IGKV8-30*01	IGKV9-120*01 F	IGKV9-120*01 F	IGKV14-100*01	IGKV9-120*01	IGKV9-120*01	IGKV17-121*01	IGKV9-120*01	IGKV17-121*01	IGKV4-91*01	IGKV14-100*01	IGKV4-70*01	IGKV9-124*01	IGKV9-124*01	IGKV17-121*01
	IGKV9-120*01	IGKV14-100*01	IGKV9-120*01	IGKV14-100*01	IGKV9-120*01	IGKV8-30*01	IGKV9-120*01 F	IGKV9-120*01 F	IGKV17-121*01	IGKV9-120*01	IGKV9-120*01	IGKV17-121*01	IGKV14-100*01	IGKV17-121*01	IGKV17-121*01	IGKV14-100*01	IGKV4-70*01	IGKV9-124*01	IGKV9-124*01	IGKV17-121*01
	IGKV9-120*01	IGKV14-100*01	IGKV9-120*01	IGKV14-100*01	IGKV9-120*01	IGKV9-120*01	IGKV9-120*01 F	IGKV9-120*01 F	IGKV14-100*01	IGKV9-120*01	IGKV14-100*01	IGKV17-121*01	IGKV14-100*01	IGKV17-121*01	IGKV4-91*01	IGKV14-100*01	IGKV4-70*01	IGKV9-124*01	IGKV9-124*01	IGKV17-121*01
	IGKV9-120*01	IGKV14-100*01	IGKV9-120*01	IGKV14-100*01	IGKV9-120*01	IGKV9-120*01	IGKV9-120*01 F	IGKV9-120*01 F	IGKV14-100*01	IGKV9-120*01	IGKV14-100*01	IGKV17-121*01	IGKV14-100*01	IGKV17-121*01	IGKV4-91*01	IGKV14-100*01	IGKV4-70*01	IGKV9-124*01	IGKV9-124*01	IGKV17-121*01
	IGKV9-120*01	IGKV14-100*01	IGKV9-120*01	IGKV14-100*01	IGKV9-120*01	IGKV8-30*01	IGKV9-120*01 F	IGKV9-120*01 F	IGKV14-100*01	IGKV9-120*01	IGKV9-120*01	IGKV17-121*01	IGKV14-100*01	IGKV17-121*01	IGKV17-121*01	IGKV14-100*01	IGKV4-70*01	IGKV9-124*01	IGKV9-124*01	IGKV17-121*01
	IGKV9-120*01	IGKV14-100*01	IGKV9-120*01	IGKV14-100*01	IGKV9-120*01	IGKV8-30*01	IGKV9-120*01 F	IGKV9-120*01 F	IGKV14-100*01	IGKV9-120*01	IGKV9-120*01	IGKV17-121*01	IGKV14-100*01	IGKV17-121*01	IGKV17-121*01	IGKV14-100*01	IGKV4-70*01	IGKV9-124*01	IGKV9-124*01	IGKV17-121*01
	IGKV9-120*01	IGKV14-100*01	IGKV9-120*01	IGKV14-100*01	IGKV9-120*01	IGKV8-30*01	IGKV9-120*01 F	IGKV9-120*01 F	IGKV14-100*01	IGKV9-120*01	IGKV9-120*01	IGKV17-121*01	IGKV14-100*01	IGKV17-121*01	IGKV17-121*01	IGKV14-100*01	IGKV4-70*01	IGKV9-124*01	IGKV9-124*01	IGKV17-121*01
	IGKV9-120*01	IGKV14-100*01	IGKV9-120*01	IGKV14-100*01	IGKV9-120*01	IGKV8-30*01	IGKV9-120*01 F	IGKV9-120*01 F	IGKV14-100*01	IGKV9-120*01	IGKV14-100*01	IGKV17-121*01	IGKV14-100*01	IGKV17-121*01	IGKV4-91*01	IGKV14-100*01	IGKV4-70*01	IGKV9-124*01	IGKV9-124*01	IGKV17-121*01
	IGKV9-120*01	IGKV14-100*01	IGKV9-120*01	IGKV14-100*01	IGKV9-120*01	IGKV9-120*01	IGKV9-120*01 F	IGKV9-120*01 F	IGKV14-100*01	IGKV9-120*01	IGKV9-120*01	IGKV17-121*01	IGKV14-100*01	IGKV17-121*01	IGKV4-91*01	IGKV14-100*01	IGKV4-70*01	IGKV9-124*01	IGKV9-124*01	IGKV17-121*01
	IGKV9-120*01	IGKV14-100*01	IGKV9-120*01	IGKV14-100*01	IGKV9-120*01	IGKV8-30*01	IGKV9-120*01 F	IGKV9-120*01 F	IGKV1-135*01	IGKV9-120*01	IGKV14-100*01	IGKV17-121*01	IGKV14-100*01	IGKV17-121*01	IGKV4-91*01	IGKV14-100*01	IGKV4-70*01	IGKV9-124*01	IGKV9-124*01	IGKV17-121*01
	IGKV9-120*01	IGKV14-100*01	IGKV9-120*01	IGKV14-100*01	IGKV9-120*01	IGKV8-30*01	IGKV9-120*01 F	IGKV14-111*01 F	IGKV14-100*01	IGKV9-120*01	IGKV9-120*01	IGKV17-121*01	IGKV14-100*01	IGKV17-121*01	IGKV4-91*01	IGKV14-100*01	IGKV4-70*01	IGKV9-124*01	IGKV9-124*01	IGKV17-121*01
	IGKV9-120*01	IGKV14-100*01	IGKV9-120*01	IGKV14-100*01	IGKV9-120*01	IGKV8-30*01	IGKV9-120*01 F	IGKV9-120*01 F	IGKV14-100*01	IGKV9-120*01	IGKV14-100*01	IGKV17-121*01	IGKV9-120*01	IGKV17-121*01	IGKV17-121*01	IGKV14-100*01	IGKV4-70*01	IGKV9-124*01	IGKV9-124*01	IGKV17-121*01
	IGKV9-120*01	IGKV14-100*01	IGKV9-120*01	IGKV14-100*01	IGKV9-120*01	IGKV9-120*01	IGKV9-120*01 F	IGKV14-111*01 F	IGKV14-100*01	IGKV9-120*01	IGKV9-120*01	IGKV17-121*01	IGKV14-100*01	IGKV17-121*01	IGKV17-121*01	IGKV14-100*01	IGKV4-70*01	IGKV9-124*01	IGKV9-124*01	IGKV17-121*01
	IGKV9-120*01	IGKV14-100*01	IGKV9-120*01	IGKV14-100*01	IGKV9-120*01	IGKV8-30*01	IGKV9-120*01 F	IGKV14-111*01 F	IGKV14-100*01	IGKV9-120*01	IGKV9-120*01	IGKV17-121*01	IGKV14-100*01	IGKV17-121*01	IGKV17-121*01	IGKV14-100*01	IGKV4-70*01	IGKV9-124*01	IGKV9-124*01	IGKV17-121*01
	IGKV9-120*01	IGKV14-100*01	IGKV9-120*01	IGKV14-100*01	IGKV9-120*01	IGKV8-30*01	IGKV9-120*01 F	IGKV9-120*01 F	IGKV14-100*01	IGKV9-120*01	IGKV9-120*01	IGKV17-121*01	IGKV14-100*01	IGKV17-121*01	IGKV4-91*01	IGKV14-100*01	IGKV4-70*01	IGKV9-124*01	IGKV9-124*01	IGKV17-121*01
	IGKV9-120*01	IGKV14-100*01	IGKV9-120*01	IGKV14-100*01	IGKV9-120*01	IGKV8-30*01	IGKV9-120*01 F	IGKV9-120*01 F	IGKV14-100*01	IGKV9-120*01	IGKV14-100*01	IGKV17-121*01	IGKV14-100*01	IGKV17-121*01	IGKV17-121*01	IGKV14-100*01	IGKV4-70*01	IGKV9-124*01	IGKV9-124*01	IGKV17-121*01
	IGKV9-120*01	IGKV14-100*01	IGKV9-120*01	IGKV14-100*01	IGKV9-120*01	IGKV8-30*01	IGKV9-120*01 F	IGKV14-111*01 F	IGKV14-100*01	IGKV9-120*01	IGKV14-100*01	IGKV17-121*01	IGKV14-100*01	IGKV17-121*01	IGKV4-91*01	IGKV14-100*01	IGKV4-70*01	IGKV9-124*01	IGKV9-124*01	IGKV17-121*01
	IGKV9-120*01	IGKV14-100*01	IGKV9-120*01	IGKV14-100*01	IGKV9-120*01	IGKV9-120*01	IGKV9-120*01 F	IGKV9-120*01 F	IGKV1-135*01	IGKV9-120*01	IGKV14-100*01	IGKV17-121*01	IGKV14-100*01	IGKV17-121*01	IGKV17-121*01	IGKV14-100*01	IGKV4-70*01	IGKV9-124*01	IGKV9-124*01	IGKV17-121*01
	IGKV9-120*01	IGKV14-100*01	IGKV9-120*01	IGKV14-100*01	IGKV9-120*01	IGKV8-30*01	IGKV9-120*01 F	IGKV9-120*01 F	IGKV14-100*01	IGKV9-120*01	IGKV14-100*01	IGKV17-121*01	IGKV14-100*01	IGKV17-121*01	IGKV17-121*01	IGKV14-100*01	IGKV4-70*01	IGKV9-124*01	IGKV9-124*01	IGKV17-121*01
	IGKV9-120*01	IGKV14-100*01	IGKV9-120*01	IGKV14-100*01	IGKV9-120*01	IGKV8-30*01	IGKV9-120*01 F	IGKV9-120*01 F	IGKV14-100*01	IGKV9-120*01	IGKV14-100*01	IGKV17-121*01	IGKV14-100*01	IGKV17-121*01	IGKV17-121*01	IGKV14-100*01	IGKV4-70*01	IGKV9-124*01	IGKV9-124*01	IGKV17-121*01
	IGKV9-120*01	IGKV14-100*01	IGKV9-120*01	IGKV14-100*01	IGKV9-120*01	IGKV8-30*01	IGKV9-120*01 F	IGKV9-120*01 F	IGKV1-135*01	IGKV9-120*01	IGKV14-100*01	IGKV17-121*01	IGKV14-100*01	IGKV17-121*01	IGKV4-91*01	IGKV14-100*01	IGKV4-70*01	IGKV9-124*01	IGKV9-124*01	IGKV17-121*01
	IGKV9-120*01	IGKV14-100*01	IGKV9-120*01	IGKV14-100*01	IGKV9-120*01	IGKV8-30*01	IGKV9-120*01 F	IGKV9-120*01 F	IGKV14-100*01	IGKV9-120*01	IGKV14-100*01	IGKV17-121*01	IGKV14-100*01	IGKV17-121*01	IGKV4-91*01	IGKV14-100*01	IGKV4-70*01	IGKV9-124*01	IGKV9-124*01	IGKV17-121*01
	IGKV9-120*01	IGKV14-100*01	IGKV9-120*01	IGKV14-100*01	IGKV9-120*01	IGKV9-120*01	IGKV9-120*01 F	IGKV9-120*01 F	IGKV4-91*01	IGKV9-120*01	IGKV14-100*01	IGKV17-121*01	IGKV14-100*01	IGKV17-121*01	IGKV4-91*01	IGKV14-100*01	IGKV4-70*01	IGKV9-124*01	IGKV9-124*01	IGKV17-121*01
	IGKV9-120*01	IGKV14-100*01	IGKV9-120*01	IGKV14-100*01	IGKV9-120*01	IGKV8-30*01	IGKV9-120*01 F	IGKV14-111*01 F	IGKV3-4*01	IGKV9-120*01	IGKV14-100*01	IGKV17-121*01	IGKV14-100*01	IGKV17-121*01	IGKV4-91*01	IGKV14-100*01	IGKV4-70*01	IGKV9-124*01	IGKV9-124*01	IGKV17-121*01
	IGKV9-120*01	IGKV14-100*01	IGKV9-120*01	IGKV14-100*01	IGKV9-120*01	IGKV8-30*01	IGKV9-120*01 F	IGKV14-111*01 F	IGKV14-100*01	IGKV9-120*01	IGKV14-100*01	IGKV17-121*01	IGKV14-100*01	IGKV17-121*01	IGKV17-121*01	IGKV14-100*01	IGKV4-70*01	IGKV9-124*01	IGKV9-124*01	IGKV17-121*01
	IGKV9-120*01	IGKV14-100*01	IGKV9-120*01	IGKV14-100*01	IGKV9-120*01	IGKV8-30*01	IGKV9-120*01 F	IGKV9-120*01 F	IGKV14-100*01	IGKV9-120*01	IGKV14-100*01	IGKV17-121*01	IGKV14-100*01	IGKV17-121*01	IGKV4-91*01	IGKV14-100*01	IGKV4-70*01	IGKV9-124*01	IGKV9-124*01	IGKV17-121*01
	IGKV9-120*01	IGKV14-100*01	IGKV9-120*01	IGKV14-100*01	IGKV9-120*01	IGKV8-30*01	IGKV9-120*01 F	IGKV14-111*01 F	IGKV14-100*01	IGKV9-120*01	IGKV14-100*01	IGKV17-121*01	IGKV14-100*01	IGKV17-121*01	IGKV17-121*01	IGKV14-100*01	IGKV4-70*01	IGKV9-124*01	IGKV9-124*01	IGKV17-121*01
	IGKV9-120*01	IGKV14-100*01	IGKV9-120*01	IGKV14-100*01	IGKV9-120*01	IGKV8-30*01	IGKV9-120*01 F	IGKV9-120*01 F	IGKV14-100*01	IGKV9-120*01	IGKV14-100*01	IGKV17-121*01	IGKV14-100*01	IGKV17-121*01	IGKV4-91*01	IGKV14-100*01	IGKV4-70*01	IGKV9-124*01	IGKV9-124*01	IGKV17-121*01
	IGKV9-120*01	IGKV14-100*01	IGKV9-120*01	IGKV14-100*01	IGKV9-120*01	IGKV8-30*01	IGKV9-120*01 F	IGKV9-120*01 F	IGKV14-100*01	IGKV9-120*01	IGKV14-100*01	IGKV17-121*01	IGKV14-100*01	IGKV17-121*01	IGKV17-121*01	IGKV14-100*01	IGKV4-70*01	IGKV9-124*01	IGKV9-124*01	IGKV17-121*01
	IGKV9-120*01	IGKV14-100*01	IGKV9-120*01	IGKV14-100*01	IGKV9-120*01	IGKV8-30*01	IGKV9-120*01 F	IGKV9-120*01 F	IGKV14-100*01	IGKV9-120*01	IGKV14-100*01	IGKV17-121*01	IGKV14-100*01	IGKV17-121*01	IGKV17-121*01	IGKV14-100*01	IGKV4-70*01	IGKV9-124*01	IGKV9-124*01	IGKV17-121*01
	IGKV9-120*01	IGKV14-100*01	IGKV9-120*01	IGKV14-100*01	IGKV9-120*01	IGKV8-30*01	IGKV9-120*01 F	IGKV14-111*01 F	IGKV1-135*01	IGKV9-120*01	IGKV14-100*01	IGKV17-121*01	IGKV9-120*01	IGKV17-121*01	IGKV17-121*01	IGKV14-100*01	IGKV4-70*01	IGKV9-124*01	IGKV9-124*01	IGKV17-121*01
	IGKV9-120*01	IGKV14-100*01	IGKV9-120*01	IGKV14-100*01	IGKV9-120*01	IGKV8-30*01	IGKV9-120*01 F	IGKV9-120*01 F	IGKV14-100*01	IGKV9-120*01	IGKV9-120*01	IGKV17-121*01	IGKV9-120*01	IGKV17-121*01	IGKV4-91*01	IGKV14-100*01	IGKV4-70*01	IGKV9-124*01	IGKV9-124*01	IGKV17-121*01
	IGKV9-120*01	IGKV14-100*01	IGKV9-120*01	IGKV14-100*01	IGKV9-120*01	IGKV9-120*01	IGKV9-120*01 F	IGKV9-120*01 F	IGKV14-100*01	IGKV9-120*01	IGKV9-120*01	IGKV17-121*01	IGKV9-120*01	IGKV17-121*01	IGKV17-121*01	IGKV14-100*01	IGKV4-70*01	IGKV9-124*01	IGKV9-124*01	IGKV17-121*01
	IGKV9-120*01	IGKV14-100*01	IGKV9-120*01	IGKV14-100*01	IGKV9-120*01	IGKV8-30*01	IGKV9-120*01 F	IGKV14-111*01 F	IGKV17-121*01	IGKV9-120*01	IGKV14-100*01	IGKV17-121*01	IGKV14-100*01	IGKV17-121*01	IGKV17-121*01	IGKV14-100*01	IGKV4-70*01	IGKV9-124*01	IGKV9-124*01	IGKV17-121*01
	IGKV9-120*01	IGKV14-100*01	IGKV9-120*01	IGKV14-100*01	IGKV9-120*01	IGKV9-120*01	IGKV9-120*01 F	IGKV9-120*01 F	IGKV14-100*01	IGKV9-120*01	IGKV14-100*01	IGKV17-121*01	IGKV9-120*01	IGKV17-121*01	IGKV4-91*01	IGKV14-100*01	IGKV4-70*01	IGKV9-124*01	IGKV9-124*01	IGKV17-121*01
	IGKV9-120*01	IGKV14-100*01	IGKV9-120*01	IGKV14-100*01	IGKV9-120*01	IGKV8-30*01	IGKV9-120*01 F	IGKV14-111*01 F	IGKV14-100*01	IGKV9-120*01	IGKV14-100*01	IGKV17-121*01	IGKV14-100*01	IGKV17-121*01	IGKV17-121*01	IGKV14-100*01	IGKV4-70*01	IGKV9-124*01	IGKV9-124*01	IGKV17-121*01
	IGKV9-120*01	IGKV14-100*01	IGKV9-120*01	IGKV14-100*01	IGKV9-120*01	IGKV8-30*01	IGKV9-120*01 F	IGKV9-120*01 F	IGKV14-100*01	IGKV9-120*01	IGKV9-120*01	IGKV17-121*01	IGKV14-100*01	IGKV17-121*01	IGKV4-91*01	IGKV14-100*01	IGKV4-70*01	IGKV9-124*01	IGKV9-124*01	IGKV17-121*01
	IGKV9-120*01	IGKV14-100*01	IGKV9-120*01	IGKV14-100*01	IGKV9-120*01	IGKV8-30*01	IGKV9-120*01 F	IGKV9-120*01 F	IGKV14-100*01	IGKV9-120*01	IGKV9-120*01	IGKV17-121*01	IGKV14-100*01	IGKV17-121*01	IGKV17-121*01	IGKV14-100*01	IGKV4-70*01	IGKV9-124*01	IGKV9-124*01	IGKV17-121*01
	IGKV9-120*01	IGKV14-100*01	IGKV9-120*01	IGKV14-100*01	IGKV9-120*01	IGKV8-30*01	IGKV9-120*01 F	IGKV9-120*01 F	IGKV14-100*01	IGKV9-120*01	IGKV9-120*01	IGKV17-121*01	IGKV14-100*01	IGKV17-121*01	IGKV4-91*01	IGKV14-100*01	IGKV4-70*01	IGKV9-124*01	IGKV9-124*01	IGKV17-121*01
	IGKV9-120*01	IGKV14-100*01	IGKV9-120*01	IGKV14-100*01	IGKV9-120*01	IGKV8-30*01	IGKV9-120*01 F	IGKV9-120*01 F	IGKV14-100*01	IGKV9-120*01	IGKV14-100*01	IGKV17-121*01	IGKV14-100*01	IGKV17-121*01	IGKV4-91*01	IGKV14-100*01	IGKV4-70*01	IGKV9-124*01	IGKV9-124*01	IGKV17-121*01
	IGKV9-120*01	IGKV14-100*01	IGKV9-120*01	IGKV14-100*01	IGKV9-120*01	IGKV8-30*01	IGKV9-120*01 F	IGKV9-120*01 F	IGKV17-121*01	IGKV9-120*01	IGKV14-100*01	IGKV17-121*01	IGKV9-120*01	IGKV17-121*01	IGKV4-91*01	IGKV14-100*01	IGKV4-70*01	IGKV9-124*01	IGKV9-124*01	IGKV17-121*01
	IGKV9-120*01	IGKV14-100*01	IGKV9-120*01	IGKV14-100*01	IGKV9-120*01	IGKV8-30*01	IGKV9-120*01 F	IGKV9-120*01 F	IGKV14-100*01	IGKV9-120*01	IGKV9-120*01	IGKV17-121*01	IGKV9-120*01	IGKV17-121*01	IGKV17-121*01	IGKV14-100*01	IGKV4-70*01	IGKV9-124*01	IGKV9-124*01	IGKV17-121*01
	IGKV9-120*01	IGKV14-100*01	IGKV9-120*01	IGKV14-100*01	IGKV9-120*01	IGKV8-30*01	IGKV9-120*01 F	IGKV9-120*01 F	IGKV14-100*01	IGKV9-120*01	IGKV14-100*01	IGKV17-121*01	IGKV14-100*01	IGKV17-121*01	IGKV17-121*01	IGKV14-100*01	IGKV4-70*01	IGKV9-124*01	IGKV9-124*01	IGKV17-121*01
	IGKV9-120*01	IGKV14-100*01	IGKV9-120*01	IGKV14-100*01	IGKV9-120*01	IGKV8-30*01	IGKV9-120*01 F	IGKV9-120*01 F	IGKV14-100*01	IGKV9-120*01	IGKV14-100*01	IGKV17-121*01	IGKV14-100*01	IGKV17-121*01	IGKV4-91*01	IGKV14-100*01	IGKV4-70*01	IGKV9-124*01	IGKV9-124*01	IGKV17-121*01
	IGKV9-120*01	IGKV14-100*01	IGKV9-120*01	IGKV14-100*01	IGKV9-120*01	IGKV8-30*01	IGKV9-120*01 F	IGKV9-120*01 F	IGKV14-100*01	IGKV9-120*01	IGKV14-100*01	IGKV17-121*01	IGKV14-100*01	IGKV17-121*01	IGKV17-121*01	IGKV14-100*01	IGKV4-70*01	IGKV9-124*01	IGKV9-124*01	IGKV17-121*01
	IGKV9-120*01	IGKV14-100*01	IGKV9-120*01	IGKV14-100*01	IGKV9-120*01	IGKV9-120*01	IGKV9-120*01 F	IGKV9-120*01 F	IGKV14-100*01	IGKV9-120*01	IGKV9-120*01	IGKV17-121*01	IGKV14-100*01	IGKV17-121*01	IGKV17-121*01	IGKV14-100*01	IGKV4-70*01	IGKV9-124*01	IGKV9-124*01	IGKV17-121*01
	IGKV9-120*01	IGKV14-100*01	IGKV9-120*01	IGKV14-100*01	IGKV9-120*01	IGKV8-30*01	IGKV9-120*01 F	IGKV9-120*01 F	IGKV14-100*01	IGKV9-120*01	IGKV14-100*01	IGKV17-121*01	IGKV14-100*01	IGKV17-121*01	IGKV17-121*01	IGKV14-100*01	IGKV4-70*01	IGKV9-124*01	IGKV9-124*01	IGKV17-121*01
	IGKV9-120*01	IGKV14-100*01	IGKV9-120*01	IGKV14-100*01	IGKV9-120*01	IGKV8-30*01	IGKV9-120*01 F	IGKV9-120*01 F	IGKV14-100*01	IGKV9-120*01	IGKV14-100*01	IGKV17-121*01	IGKV14-100*01	IGKV17-121*01	IGKV4-91*01	IGKV14-100*01	IGKV4-70*01	IGKV9-124*01	IGKV9-124*01	IGKV17-121*01
	IGKV9-120*01	IGKV14-100*01	IGKV9-120*01	IGKV14-100*01	IGKV9-120*01	IGKV8-30*01	IGKV9-120*01 F	IGKV14-111*01 F	IGKV14-100*01	IGKV9-120*01	IGKV9-120*01	IGKV17-121*01	IGKV14-100*01	IGKV17-121*01	IGKV17-121*01	IGKV14-100*01	IGKV4-70*01	IGKV9-124*01	IGKV9-124*01	IGKV17-121*01
	IGKV9-120*01	IGKV14-100*01	IGKV9-120*01	IGKV14-100*01	IGKV9-120*01	IGKV9-120*01	IGKV9-120*01 F	IGKV9-120*01 F	IGKV14-100*01	IGKV9-120*01	IGKV14-100*01	IGKV17-121*01	IGKV14-100*01	IGKV17-121*01	IGKV17-121*01	IGKV14-100*01	IGKV4-70*01	IGKV9-124*01	IGKV9-124*01	IGKV17-121*01
	IGKV9-120*01	IGKV14-100*01	IGKV9-120*01	IGKV14-100*01	IGKV9-120*01	IGKV8-30*01	IGKV9-120*01 F	IGKV14-111*01 F	IGKV14-100*01	IGKV9-120*01	IGKV14-100*01	IGKV17-121*01	IGKV14-100*01	IGKV17-121*01	IGKV4-91*01	IGKV14-100*01	IGKV4-70*01	IGKV9-124*01	IGKV9-124*01	IGKV17-121*01
	IGKV9-120*01	IGKV14-100*01	IGKV9-120*01	IGKV14-100*01	IGKV9-120*01	IGKV8-30*01	IGKV9-120*01 F	IGKV9-120*01 F	IGKV14-100*01	IGKV9-120*01	IGKV9-120*01	IGKV17-121*01	IGKV14-100*01	IGKV17-121*01	IGKV17-121*01	IGKV14-100*01	IGKV4-70*01	IGKV9-124*01	IGKV9-124*01	IGKV17-121*01
	IGKV9-120*01	IGKV14-100*01	IGKV9-120*01	IGKV14-100*01	IGKV9-120*01	IGKV8-30*01	IGKV9-120*01 F	IGKV9-120*01 F	IGKV14-100*01	IGKV9-120*01	IGKV14-100*01	IGKV17-121*01	IGKV14-100*01	IGKV17-121*01	IGKV4-91*01	IGKV14-100*01	IGKV4-70*01	IGKV9-124*01	IGKV9-124*01	IGKV17-121*01
	IGKV9-120*01	IGKV14-100*01	IGKV9-120*01	IGKV14-100*01	IGKV9-120*01	IGKV8-30*01	IGKV9-120*01 F	IGKV9-120*01 F	IGKV14-100*01	IGKV9-120*01	IGKV14-100*01	IGKV17-121*01	IGKV14-100*01	IGKV17-121*01	IGKV4-91*01	IGKV14-100*01	IGKV4-70*01	IGKV9-124*01	IGKV9-124*01	IGKV17-121*01
	IGKV9-120*01	IGKV14-100*01	IGKV9-120*01	IGKV14-100*01	IGKV9-120*01	IGKV8-30*01	IGKV9-120*01 F	IGKV9-120*01 F	IGKV3-5*01	IGKV9-120*01	IGKV14-100*01	IGKV17-121*01	IGKV14-100*01	IGKV17-121*01	IGKV4-91*01	IGKV14-100*01	IGKV4-70*01	IGKV9-124*01	IGKV9-124*01	IGKV17-121*01
	IGKV9-120*01	IGKV14-100*01	IGKV9-120*01	IGKV14-100*01	IGKV9-120*01	IGKV9-120*01	IGKV9-120*01 F	IGKV14-111*01 F	IGKV1-135*01	IGKV9-120*01	IGKV14-100*01	IGKV17-121*01	IGKV14-100*01	IGKV17-121*01	IGKV17-121*01	IGKV14-100*01	IGKV4-70*01	IGKV9-124*01	IGKV9-124*01	IGKV17-121*01
	IGKV9-120*01	IGKV14-100*01	IGKV9-120*01	IGKV14-100*01	IGKV9-120*01	IGKV8-30*01	IGKV9-120*01 F	IGKV9-120*01 F	IGKV14-100*01	IGKV9-120*01	IGKV14-100*01	IGKV17-121*01	IGKV9-120*01	IGKV17-121*01	IGKV17-121*01	IGKV14-100*01	IGKV4-70*01	IGKV9-124*01	IGKV9-124*01	IGKV17-121*01
	IGKV9-120*01	IGKV14-100*01	IGKV9-120*01	IGKV14-100*01	IGKV9-120*01	IGKV9-120*01	IGKV9-120*01 F	IGKV9-120*01 F	IGKV1-110*01	IGKV9-120*01	IGKV14-100*01	IGKV17-121*01	IGKV14-100*01	IGKV17-121*01	IGKV17-121*01	IGKV14-100*01	IGKV4-70*01	IGKV9-124*01	IGKV9-124*01	IGKV17-121*01
	IGKV9-120*01	IGKV14-100*01	IGKV9-120*01	IGKV14-100*01	IGKV9-120*01	IGKV8-30*01	IGKV9-120*01 F	IGKV14-111*01 F	IGKV14-100*01	IGKV9-120*01	IGKV14-100*01	IGKV17-121*01	IGKV14-100*01	IGKV17-121*01	IGKV17-121*01	IGKV14-100*01	IGKV4-70*01	IGKV9-124*01	IGKV9-124*01	IGKV17-121*01
	IGKV9-120*01	IGKV14-100*01	IGKV9-120*01	IGKV14-100*01	IGKV9-120*01	IGKV8-30*01	IGKV9-120*01 F	IGKV9-120*01 F	IGKV14-100*01	IGKV9-120*01	IGKV14-100*01	IGKV17-121*01	IGKV9-120*01	IGKV17-121*01	IGKV4-91*01	IGKV14-100*01	IGKV4-70*01	IGKV9-124*01	IGKV9-124*01	IGKV17-121*01
	IGKV9-120*01	IGKV14-100*01	IGKV9-120*01	IGKV14-100*01	IGKV9-120*01	IGKV8-30*01	IGKV9-120*01 F	IGKV14-111*01 F	IGKV14-100*01	IGKV9-120*01	IGKV14-100*01	IGKV17-121*01	IGKV14-100*01	IGKV17-121*01	IGKV4-91*01	IGKV14-100*01	IGKV4-70*01	IGKV9-124*01	IGKV9-124*01	IGKV17-121*01
	IGKV9-120*01	IGKV14-100*01	IGKV9-120*01	IGKV14-100*01	IGKV9-120*01	IGKV8-30*01	IGKV9-120*01 F	IGKV9-120*01 F	IGKV14-100*01	IGKV9-120*01	IGKV14-100*01	IGKV17-121*01	IGKV9-120*01	IGKV17-121*01	IGKV17-121*01	IGKV14-100*01	IGKV4-70*01	IGKV9-124*01	IGKV9-124*01	IGKV17-121*01
	IGKV9-120*01	IGKV14-100*01	IGKV9-120*01	IGKV14-100*01	IGKV9-120*01	IGKV8-30*01	IGKV9-120*01 F	IGKV9-120*01 F	IGKV14-100*01	IGKV9-120*01	IGKV9-120*01	IGKV17-121*01	IGKV14-100*01	IGKV17-121*01	IGKV17-121*01	IGKV14-100*01	IGKV4-70*01	IGKV9-124*01	IGKV9-124*01	IGKV17-121*01
	IGKV9-120*01	IGKV14-100*01	IGKV9-120*01	IGKV14-100*01	IGKV9-120*01	IGKV8-30*01	IGKV9-120*01 F	IGKV9-120*01 F	IGKV14-100*01	IGKV9-120*01	IGKV14-100*01	IGKV17-121*01	IGKV14-100*01	IGKV17-121*01	IGKV4-91*01	IGKV14-100*01	IGKV4-70*01	IGKV9-124*01	IGKV9-124*01	IGKV17-121*01
	IGKV9-120*01	IGKV14-100*01	IGKV9-120*01	IGKV14-100*01	IGKV9-120*01	IGKV8-30*01	IGKV9-120*01 F	IGKV9-120*01 F	IGKV14-100*01	IGKV9-120*01	IGKV9-120*01	IGKV17-121*01	IGKV14-100*01	IGKV17-121*01	IGKV17-121*01	IGKV14-100*01	IGKV4-70*01	IGKV9-124*01	IGKV9-124*01	IGKV17-121*01
	IGKV9-120*01	IGKV14-100*01	IGKV9-120*01	IGKV14-100*01	IGKV9-120*01	IGKV8-30*01	IGKV9-120*01 F	IGKV14-111*01 F	IGKV14-100*01	IGKV9-120*01	IGKV14-100*01	IGKV17-121*01	IGKV14-100*01	IGKV17-121*01	IGKV17-121*01	IGKV14-100*01	IGKV4-70*01	IGKV9-124*01	IGKV9-124*01	IGKV17-121*01
	IGKV9-120*01	IGKV14-100*01	IGKV9-120*01	IGKV14-100*01	IGKV9-120*01	IGKV8-30*01	IGKV9-120*01 F	IGKV9-120*01 F	IGKV14-100*01	IGKV9-120*01	IGKV14-100*01	IGKV17-121*01	IGKV14-100*01	IGKV17-121*01	IGKV17-121*01	IGKV14-100*01	IGKV4-70*01	IGKV4-53*01	IGKV9-124*01	IGKV17-121*01
	IGKV9-120*01	IGKV14-100*01	IGKV9-120*01	IGKV14-100*01	IGKV9-120*01	IGKV8-30*01	IGKV9-120*01 F	IGKV14-111*01 F	IGKV14-100*01	IGKV9-120*01	IGKV9-120*01	IGKV17-121*01	IGKV14-100*01	IGKV17-121*01	IGKV17-121*01	IGKV14-100*01	IGKV4-70*01	IGKV9-124*01	IGKV9-124*01	IGKV17-121*01
	IGKV9-120*01	IGKV14-100*01	IGKV9-120*01	IGKV14-100*01	IGKV9-120*01	IGKV8-30*01	IGKV9-120*01 F	IGKV9-120*01 F	IGKV14-100*01	IGKV9-120*01	IGKV9-120*01	IGKV17-121*01	IGKV14-100*01	IGKV17-121*01	IGKV17-121*01	IGKV14-100*01	IGKV4-70*01	IGKV9-124*01	IGKV9-124*01	IGKV17-121*01
	IGKV9-120*01	IGKV14-100*01	IGKV9-120*01	IGKV14-100*01	IGKV9-120*01	IGKV8-30*01	IGKV9-120*01 F	IGKV9-120*01 F	IGKV14-100*01	IGKV9-120*01	IGKV9-120*01	IGKV17-121*01	IGKV14-100*01	IGKV17-121*01	IGKV4-91*01	IGKV14-100*01	IGKV4-70*01	IGKV9-124*01	IGKV9-124*01	IGKV17-121*01
	IGKV9-120*01	IGKV14-100*01	IGKV9-120*01	IGKV14-100*01	IGKV9-120*01	IGKV9-120*01	IGKV9-120*01 F	IGKV9-120*01 F	IGKV14-100*01	IGKV9-120*01	IGKV9-120*01	IGKV17-121*01	IGKV14-100*01	IGKV17-121*01	IGKV4-91*01	IGKV14-100*01	IGKV4-70*01	IGKV9-124*01	IGKV9-124*01	IGKV17-121*01
	IGKV9-120*01	IGKV14-100*01	IGKV9-120*01	IGKV14-100*01	IGKV9-120*01	IGKV8-30*01	IGKV9-120*01 F	IGKV14-111*01 F	IGKV14-100*01	IGKV9-120*01	IGKV14-100*01	IGKV17-121*01	IGKV14-100*01	IGKV17-121*01	IGKV4-91*01	IGKV14-100*01	IGKV4-70*01	IGKV9-124*01	IGKV9-124*01	IGKV17-121*01
	IGKV9-120*01	IGKV14-100*01	IGKV9-120*01	IGKV14-100*01	IGKV9-120*01	IGKV9-120*01	IGKV9-120*01 F	IGKV14-111*01 F	IGKV14-100*01	IGKV9-120*01	IGKV14-100*01	IGKV17-121*01	IGKV14-100*01	IGKV17-121*01	IGKV17-121*01	IGKV14-100*01	IGKV4-70*01	IGKV9-124*01	IGKV9-124*01	IGKV17-121*01
	IGKV9-120*01	IGKV14-100*01	IGKV9-120*01	IGKV14-100*01	IGKV9-120*01	IGKV9-120*01	IGKV9-120*01 F	IGKV9-120*01 F	IGKV14-100*01	IGKV9-120*01	IGKV14-100*01	IGKV17-121*01	IGKV9-120*01	IGKV17-121*01	IGKV17-121*01	IGKV14-100*01	IGKV4-70*01	IGKV9-124*01	IGKV9-124*01	IGKV17-121*01
	IGKV9-120*01	IGKV14-100*01	IGKV9-120*01	IGKV14-100*01	IGKV9-120*01	IGKV8-30*01	IGKV9-120*01 F	IGKV9-120*01 F	IGKV14-100*01	IGKV9-120*01	IGKV14-100*01	IGKV17-121*01	IGKV14-100*01	IGKV17-121*01	IGKV17-121*01	IGKV14-100*01	IGKV4-70*01	IGKV9-124*01	IGKV9-124*01	IGKV17-121*01
	IGKV9-120*01	IGKV14-100*01	IGKV9-120*01	IGKV14-100*01	IGKV9-120*01	IGKV8-30*01	IGKV9-120*01 F	IGKV9-120*01 F	IGKV14-100*01	IGKV9-120*01	IGKV14-100*01	IGKV17-121*01	IGKV14-100*01	IGKV17-121*01	IGKV17-121*01	IGKV14-100*01	IGKV4-70*01	IGKV9-124*01	IGKV9-124*01	IGKV17-121*01
	IGKV9-120*01	IGKV14-100*01	IGKV9-120*01	IGKV14-100*01	IGKV9-120*01	IGKV8-30*01	IGKV9-120*01 F	IGKV9-120*01 F	IGKV14-100*01	IGKV9-120*01	IGKV14-100*01	IGKV17-121*01	IGKV14-100*01	IGKV17-121*01	IGKV17-121*01	IGKV14-100*01	IGKV4-70*01	IGKV9-124*01	IGKV9-124*01	IGKV17-121*01
	IGKV9-120*01	IGKV14-100*01	IGKV9-120*01	IGKV14-100*01	IGKV9-120*01	IGKV8-30*01	IGKV9-120*01 F	IGKV14-111*01 F	IGKV14-100*01	IGKV9-120*01	IGKV9-120*01	IGKV17-121*01	IGKV14-100*01	IGKV17-121*01	IGKV17-121*01	IGKV14-100*01	IGKV4-70*01	IGKV9-124*01	IGKV9-124*01	IGKV17-121*01
	IGKV9-120*01	IGKV14-100*01	IGKV9-120*01	IGKV14-100*01	IGKV9-120*01	IGKV8-30*01	IGKV9-120*01 F	IGKV9-120*01 F	IGKV14-100*01	IGKV9-120*01	IGKV9-120*01	IGKV17-121*01	IGKV14-100*01	IGKV17-121*01	IGKV4-91*01	IGKV14-100*01	IGKV4-70*01	IGKV9-124*01	IGKV9-124*01	IGKV17-121*01
	IGKV9-120*01	IGKV14-100*01	IGKV9-120*01	IGKV14-100*01	IGKV9-120*01	IGKV8-30*01	IGKV9-120*01 F	IGKV14-111*01 F	IGKV14-100*01	IGKV9-120*01	IGKV14-100*01	IGKV17-121*01	IGKV14-100*01	IGKV17-121*01	IGKV17-121*01	IGKV14-100*01	IGKV4-70*01	IGKV9-124*01	IGKV9-124*01	IGKV17-121*01
	IGKV9-120*01	IGKV14-100*01	IGKV9-120*01	IGKV14-100*01	IGKV9-120*01	IGKV8-30*01	IGKV9-120*01 F	IGKV9-120*01 F	IGKV1-135*01	IGKV9-120*01	IGKV9-120*01	IGKV17-121*01	IGKV14-100*01	IGKV17-121*01	IGKV4-91*01	IGKV14-100*01	IGKV4-70*01	IGKV9-124*01	IGKV9-124*01	IGKV17-121*01
	IGKV9-120*01	IGKV14-100*01	IGKV9-120*01	IGKV14-100*01	IGKV9-120*01	IGKV8-30*01	IGKV9-120*01 F	IGKV9-120*01 F	IGKV14-100*01	IGKV9-120*01	IGKV9-120*01	IGKV17-121*01	IGKV9-120*01	IGKV17-121*01	IGKV17-121*01	IGKV14-100*01	IGKV4-70*01	IGKV9-124*01	IGKV9-124*01	IGKV17-121*01
	IGKV9-120*01	IGKV14-100*01	IGKV9-120*01	IGKV14-100*01	IGKV9-120*01	IGKV8-30*01	IGKV9-120*01 F	IGKV9-120*01 F	IGKV14-100*01	IGKV9-120*01	IGKV9-120*01	IGKV17-121*01	IGKV14-100*01	IGKV17-121*01	IGKV17-121*01	IGKV14-100*01	IGKV4-70*01	IGKV9-124*01	IGKV9-124*01	IGKV17-121*01
	IGKV9-120*01	IGKV14-100*01	IGKV9-120*01	IGKV14-100*01	IGKV9-120*01	IGKV8-30*01	IGKV9-120*01 F	IGKV9-120*01 F	IGKV14-100*01	IGKV9-120*01	IGKV9-120*01	IGKV17-121*01	IGKV9-120*01	IGKV17-121*01	IGKV17-121*01	IGKV14-100*01	IGKV4-70*01	IGKV9-124*01	IGKV9-124*01	IGKV17-121*01
	IGKV9-120*01	IGKV14-100*01	IGKV9-120*01	IGKV14-100*01	IGKV9-120*01	IGKV8-30*01	IGKV9-120*01 F	IGKV9-120*01 F	IGKV14-100*01	IGKV9-120*01	IGKV9-120*01	IGKV17-121*01	IGKV14-100*01	IGKV17-121*01	IGKV4-91*01	IGKV14-100*01	IGKV4-70*01	IGKV9-124*01	IGKV9-124*01	IGKV17-121*01
	IGKV9-120*01	IGKV14-100*01	IGKV9-120*01	IGKV14-100*01	IGKV9-120*01	IGKV8-30*01	IGKV9-120*01 F	IGKV9-120*01 F	IGKV14-100*01	IGKV9-120*01	IGKV14-100*01	IGKV17-121*01	IGKV14-100*01	IGKV17-121*01	IGKV17-121*01	IGKV14-100*01	IGKV4-70*01	IGKV9-124*01	IGKV9-124*01	IGKV17-121*01
	IGKV9-120*01	IGKV14-100*01	IGKV9-120*01	IGKV14-100*01	IGKV9-120*01	IGKV8-30*01	IGKV9-120*01 F	IGKV9-120*01 F	IGKV14-100*01	IGKV9-120*01	IGKV14-100*01	IGKV17-121*01	IGKV9-120*01	IGKV17-121*01	IGKV4-91*01	IGKV14-100*01	IGKV4-70*01	IGKV9-124*01	IGKV9-124*01	IGKV17-121*01
	IGKV9-120*01	IGKV14-100*01	IGKV9-120*01	IGKV14-100*01	IGKV9-120*01	IGKV9-120*01	IGKV9-120*01 F	IGKV9-120*01 F	IGKV14-100*01	IGKV9-120*01	IGKV9-120*01	IGKV17-121*01	IGKV14-100*01	IGKV17-121*01	IGKV17-121*01	IGKV14-100*01	IGKV4-70*01	IGKV9-124*01	IGKV9-124*01	IGKV17-121*01
	IGKV9-120*01	IGKV14-100*01	IGKV9-120*01	IGKV14-100*01	IGKV9-120*01	IGKV8-30*01	IGKV9-120*01 F	IGKV9-120*01 F	IGKV14-100*01	IGKV9-120*01	IGKV14-100*01	IGKV17-121*01	IGKV14-100*01	IGKV17-121*01	IGKV4-91*01	IGKV14-100*01	IGKV4-70*01	IGKV9-124*01	IGKV9-124*01	IGKV17-121*01
	IGKV9-120*01	IGKV14-100*01	IGKV9-120*01	IGKV14-100*01	IGKV9-120*01	IGKV8-30*01	IGKV9-120*01 F	IGKV14-111*01 F	IGKV14-100*01	IGKV9-120*01	IGKV14-100*01	IGKV17-121*01	IGKV14-100*01	IGKV17-121*01	IGKV17-121*01	IGKV14-100*01	IGKV4-70*01	IGKV9-124*01	IGKV9-124*01	IGKV17-121*01
	IGKV9-120*01	IGKV14-100*01	IGKV9-120*01	IGKV14-100*01	IGKV9-120*01	IGKV9-120*01	IGKV9-120*01 F	IGKV9-120*01 F	IGKV4-59*01	IGKV9-120*01	IGKV9-120*01	IGKV17-121*01	IGKV14-100*01	IGKV17-121*01	IGKV4-91*01	IGKV14-100*01	IGKV4-70*01	IGKV9-124*01	IGKV9-124*01	IGKV17-121*01
	IGKV9-120*01	IGKV14-100*01	IGKV9-120*01	IGKV14-100*01	IGKV9-120*01	IGKV8-30*01	IGKV9-120*01 F	IGKV9-120*01 F	IGKV14-100*01	IGKV9-120*01	IGKV9-120*01	IGKV17-121*01	IGKV14-100*01	IGKV17-121*01	IGKV17-121*01	IGKV14-100*01	IGKV4-70*01	IGKV9-124*01	IGKV9-124*01	IGKV17-121*01
	IGKV9-120*01	IGKV14-100*01	IGKV9-120*01	IGKV14-100*01	IGKV9-120*01	IGKV8-30*01	IGKV9-120*01 F	IGKV9-120*01 F	IGKV14-100*01	IGKV9-120*01	IGKV14-100*01	IGKV17-121*01	IGKV9-120*01	IGKV17-121*01	IGKV17-121*01	IGKV14-100*01	IGKV4-70*01	IGKV9-124*01	IGKV9-124*01	IGKV17-121*01
	IGKV9-120*01	IGKV14-100*01	IGKV9-120*01	IGKV14-100*01	IGKV9-120*01	IGKV9-120*01	IGKV9-120*01 F	IGKV9-120*01 F	IGKV14-100*01	IGKV9-120*01	IGKV14-100*01	IGKV17-121*01	IGKV14-100*01	IGKV17-121*01	IGKV17-121*01	IGKV14-100*01	IGKV4-70*01	IGKV9-124*01	IGKV9-124*01	IGKV17-121*01
	IGKV9-120*01	IGKV14-100*01	IGKV9-120*01	IGKV14-100*01	IGKV9-120*01	IGKV8-30*01	IGKV9-120*01 F	IGKV9-120*01 F	IGKV14-100*01	IGKV9-120*01	IGKV14-100*01	IGKV17-121*01	IGKV14-100*01	IGKV17-121*01	IGKV17-121*01	IGKV14-100*01	IGKV4-70*01	IGKV9-124*01	IGKV9-124*01	IGKV17-121*01
	IGKV9-120*01	IGKV14-100*01	IGKV9-120*01	IGKV14-100*01	IGKV9-120*01	IGKV9-120*01	IGKV9-120*01 F	IGKV9-120*01 F	IGKV14-100*01	IGKV9-120*01	IGKV14-100*01	IGKV17-121*01	IGKV14-100*01	IGKV17-121*01	IGKV4-91*01	IGKV14-100*01	IGKV4-70*01	IGKV9-124*01	IGKV9-124*01	IGKV17-121*01
	IGKV9-120*01	IGKV14-100*01	IGKV9-120*01	IGKV14-100*01	IGKV9-120*01	IGKV9-120*01	IGKV9-120*01 F	IGKV9-120*01 F	IGKV14-100*01	IGKV9-120*01	IGKV9-120*01	IGKV17-121*01	IGKV14-100*01	IGKV17-121*01	IGKV17-121*01	IGKV14-100*01	IGKV4-70*01	IGKV9-124*01	IGKV9-124*01	IGKV17-121*01
	IGKV9-120*01	IGKV14-100*01	IGKV9-120*01	IGKV14-100*01	IGKV9-120*01	IGKV8-30*01	IGKV9-120*01 F	IGKV9-120*01 F	IGKV1-135*01	IGKV9-120*01	IGKV9-120*01	IGKV17-121*01	IGKV14-100*01	IGKV17-121*01	IGKV17-121*01	IGKV14-100*01	IGKV4-70*01	IGKV9-124*01	IGKV9-124*01	IGKV17-121*01
	IGKV9-120*01	IGKV14-100*01	IGKV9-120*01	IGKV14-100*01	IGKV9-120*01	IGKV9-120*01	IGKV9-120*01 F	IGKV9-120*01 F	IGKV17-121*01	IGKV9-120*01	IGKV9-120*01	IGKV17-121*01	IGKV14-100*01	IGKV17-121*01	IGKV17-121*01	IGKV14-100*01	IGKV4-70*01	IGKV9-124*01	IGKV9-124*01	IGKV17-121*01
	IGKV9-120*01	IGKV14-100*01	IGKV9-120*01	IGKV14-100*01	IGKV9-120*01	IGKV9-120*01	IGKV9-120*01 F	IGKV9-120*01 F	IGKV14-100*01	IGKV9-120*01	IGKV14-100*01	IGKV17-121*01	IGKV14-100*01	IGKV17-121*01	IGKV4-91*01	IGKV14-100*01	IGKV4-70*01	IGKV9-124*01	IGKV9-124*01	IGKV17-121*01
	IGKV9-120*01	IGKV14-100*01	IGKV9-120*01	IGKV14-100*01	IGKV9-120*01	IGKV8-30*01	IGKV9-120*01 F	IGKV9-120*01 F	IGKV14-100*01	IGKV9-120*01	IGKV14-100*01	IGKV17-121*01	IGKV14-100*01	IGKV17-121*01	IGKV17-121*01	IGKV14-100*01	IGKV4-70*01	IGKV9-124*01	IGKV9-124*01	IGKV17-121*01
	IGKV9-120*01	IGKV14-100*01	IGKV9-120*01	IGKV14-100*01	IGKV9-120*01	IGKV8-30*01	IGKV9-120*01 F	IGKV9-120*01 F	IGKV14-100*01	IGKV9-120*01	IGKV9-120*01	IGKV17-121*01	IGKV14-100*01	IGKV17-121*01	IGKV4-91*01	IGKV14-100*01	IGKV4-70*01	IGKV9-124*01	IGKV9-124*01	IGKV17-121*01
	IGKV9-120*01	IGKV14-100*01	IGKV9-120*01	IGKV14-100*01	IGKV9-120*01	IGKV8-30*01	IGKV9-120*01 F	IGKV9-120*01 F	IGKV3-1*01	IGKV9-120*01	IGKV14-100*01	IGKV17-121*01	IGKV14-100*01	IGKV17-121*01	IGKV4-91*01	IGKV14-100*01	IGKV4-70*01	IGKV9-124*01	IGKV9-124*01	IGKV17-121*01
	IGKV9-120*01	IGKV14-100*01	IGKV9-120*01	IGKV14-100*01	IGKV9-120*01	IGKV8-30*01	IGKV9-120*01 F	IGKV9-120*01 F	IGKV14-100*01	IGKV9-120*01	IGKV9-120*01	IGKV17-121*01	IGKV14-100*01	IGKV17-121*01	IGKV17-121*01	IGKV14-100*01	IGKV4-70*01	IGKV9-124*01	IGKV9-124*01	IGKV17-121*01
	IGKV9-120*01	IGKV14-100*01	IGKV9-120*01	IGKV14-100*01	IGKV9-120*01	IGKV8-30*01	IGKV9-120*01 F	IGKV9-120*01 F	IGKV14-100*01	IGKV9-120*01	IGKV9-120*01	IGKV17-121*01	IGKV9-120*01	IGKV17-121*01	IGKV4-91*01	IGKV14-100*01	IGKV4-70*01	IGKV9-124*01	IGKV9-124*01	IGKV17-121*01
	IGKV9-120*01	IGKV14-100*01	IGKV9-120*01	IGKV14-100*01	IGKV9-120*01	IGKV8-30*01	IGKV9-120*01 F	IGKV9-120*01 F	IGKV14-100*01	IGKV9-120*01	IGKV14-100*01	IGKV17-121*01	IGKV9-120*01	IGKV17-121*01	IGKV4-91*01	IGKV14-100*01	IGKV4-70*01	IGKV9-124*01	IGKV9-124*01	IGKV17-121*01
	IGKV9-120*01	IGKV14-100*01	IGKV9-120*01	IGKV14-100*01	IGKV9-120*01	IGKV8-30*01	IGKV9-120*01 F	IGKV9-120*01 F	IGKV17-121*01	IGKV9-120*01	IGKV9-120*01	IGKV17-121*01	IGKV14-100*01	IGKV17-121*01	IGKV4-91*01	IGKV14-100*01	IGKV4-70*01	IGKV9-124*01	IGKV9-124*01	IGKV17-121*01
	IGKV9-120*01	IGKV14-100*01	IGKV9-120*01	IGKV14-100*01	IGKV9-120*01	IGKV8-30*01	IGKV9-120*01 F	IGKV9-120*01 F	IGKV14-100*01	IGKV9-120*01	IGKV14-100*01	IGKV17-121*01	IGKV14-100*01	IGKV17-121*01	IGKV17-121*01	IGKV14-100*01	IGKV4-70*01	IGKV9-124*01	IGKV9-124*01	IGKV17-121*01
	IGKV9-120*01	IGKV14-100*01	IGKV9-120*01	IGKV14-100*01	IGKV9-120*01	IGKV8-30*01	IGKV9-120*01 F	IGKV9-120*01 F	IGKV14-100*01	IGKV9-120*01	IGKV9-120*01	IGKV17-121*01	IGKV14-100*01	IGKV17-121*01	IGKV4-91*01	IGKV14-100*01	IGKV4-70*01	IGKV9-124*01	IGKV9-124*01	IGKV17-121*01
	IGKV9-120*01	IGKV14-100*01	IGKV9-120*01	IGKV14-100*01	IGKV9-120*01	IGKV8-30*01	IGKV9-120*01 F	IGKV14-111*01 F	IGKV14-100*01	IGKV9-120*01	IGKV14-100*01	IGKV17-121*01	IGKV9-120*01	IGKV17-121*01	IGKV4-91*01	IGKV14-100*01	IGKV4-70*01	IGKV9-124*01	IGKV9-124*01	IGKV17-121*01
	IGKV9-120*01	IGKV14-100*01	IGKV9-120*01	IGKV14-100*01	IGKV9-120*01	IGKV8-30*01	IGKV9-120*01 F	IGKV9-120*01 F	IGKV17-121*01	IGKV9-120*01	IGKV14-100*01	IGKV17-121*01	IGKV14-100*01	IGKV17-121*01	IGKV17-121*01	IGKV14-100*01	IGKV4-70*01	IGKV9-124*01	IGKV9-124*01	IGKV17-121*01
	IGKV9-120*01	IGKV14-100*01	IGKV9-120*01	IGKV14-100*01	IGKV9-120*01	IGKV8-30*01	IGKV9-120*01 F	IGKV9-120*01 F	IGKV14-100*01	IGKV9-120*01	IGKV9-120*01	IGKV17-121*01	IGKV14-100*01	IGKV17-121*01	IGKV17-121*01	IGKV14-100*01	IGKV4-70*01	IGKV9-124*01	IGKV9-124*01	IGKV17-121*01
	IGKV9-120*01	IGKV14-100*01	IGKV9-120*01	IGKV14-100*01	IGKV9-120*01	IGKV9-120*01	IGKV9-120*01 F	IGKV9-120*01 F	IGKV14-100*01	IGKV9-120*01	IGKV14-100*01	IGKV17-121*01	IGKV14-100*01	IGKV17-121*01	IGKV17-121*01	IGKV14-100*01	IGKV4-70*01	IGKV9-124*01	IGKV9-124*01	IGKV17-121*01
	IGKV9-120*01	IGKV14-100*01	IGKV9-120*01	IGKV14-100*01	IGKV9-120*01	IGKV8-30*01	IGKV9-120*01 F	IGKV9-120*01 F	IGKV14-100*01	IGKV9-120*01	IGKV14-100*01	IGKV17-121*01	IGKV14-100*01	IGKV17-121*01	IGKV17-121*01	IGKV14-100*01	IGKV4-70*01	IGKV9-124*01	IGKV9-124*01	IGKV17-121*01
	IGKV9-120*01	IGKV14-100*01	IGKV9-120*01	IGKV14-100*01	IGKV9-120*01	IGKV8-30*01	IGKV9-120*01 F	IGKV9-120*01 F	IGKV14-100*01	IGKV9-120*01	IGKV14-100*01	IGKV17-121*01	IGKV14-100*01	IGKV17-121*01	IGKV17-121*01	IGKV14-100*01	IGKV4-70*01	IGKV9-124*01	IGKV9-124*01	IGKV17-121*01
	IGKV9-120*01	IGKV14-100*01	IGKV9-120*01	IGKV14-100*01	IGKV9-120*01	IGKV8-30*01	IGKV9-120*01 F	IGKV9-120*01 F	IGKV14-100*01	IGKV9-120*01	IGKV14-100*01	IGKV17-121*01	IGKV14-100*01	IGKV17-121*01	IGKV17-121*01	IGKV14-100*01	IGKV4-70*01	IGKV9-124*01	IGKV9-124*01	IGKV17-121*01
	IGKV9-120*01	IGKV14-100*01	IGKV9-120*01	IGKV14-100*01	IGKV9-120*01	IGKV9-120*01	IGKV9-120*01 F	IGKV9-120*01 F	IGKV14-100*01	IGKV9-120*01	IGKV14-100*01	IGKV17-121*01	IGKV9-120*01	IGKV17-121*01	IGKV17-121*01	IGKV14-100*01	IGKV4-70*01	IGKV9-124*01	IGKV9-124*01	IGKV17-121*01
	IGKV9-120*01	IGKV14-100*01	IGKV9-120*01	IGKV14-100*01	IGKV9-120*01	IGKV8-30*01	IGKV9-120*01 F	IGKV9-120*01 F	IGKV14-100*01	IGKV9-120*01	IGKV9-120*01	IGKV17-121*01	IGKV14-100*01	IGKV17-121*01	IGKV17-121*01	IGKV14-100*01	IGKV4-70*01	IGKV9-124*01	IGKV9-124*01	IGKV17-121*01
	IGKV9-120*01	IGKV14-100*01	IGKV9-120*01	IGKV14-100*01	IGKV9-120*01	IGKV8-30*01	IGKV9-120*01 F	IGKV9-120*01 F	IGKV14-100*01	IGKV9-120*01	IGKV9-120*01	IGKV17-121*01	IGKV14-100*01	IGKV17-121*01	IGKV17-121*01	IGKV14-100*01	IGKV4-70*01	IGKV9-124*01	IGKV9-124*01	IGKV17-121*01
	IGKV9-120*01	IGKV14-100*01	IGKV9-120*01	IGKV14-100*01	IGKV9-120*01	IGKV9-120*01	IGKV9-120*01 F	IGKV14-111*01 F	IGKV14-100*01	IGKV9-120*01	IGKV9-120*01	IGKV17-121*01	IGKV14-100*01	IGKV17-121*01	IGKV17-121*01	IGKV14-100*01	IGKV4-70*01	IGKV9-124*01	IGKV9-124*01	IGKV17-121*01
	IGKV9-120*01	IGKV14-100*01	IGKV9-120*01	IGKV14-100*01	IGKV9-120*01	IGKV8-30*01	IGKV9-120*01 F	IGKV9-120*01 F	IGKV1-135*01	IGKV9-120*01	IGKV14-100*01	IGKV17-121*01	IGKV14-100*01	IGKV17-121*01	IGKV17-121*01	IGKV14-100*01	IGKV4-70*01	IGKV9-124*01	IGKV9-124*01	IGKV17-121*01
	IGKV9-120*01	IGKV14-100*01	IGKV9-120*01	IGKV14-100*01	IGKV9-120*01	IGKV8-30*01	IGKV9-120*01 F	IGKV9-120*01 F	IGKV14-100*01	IGKV9-120*01	IGKV9-120*01	IGKV17-121*01	IGKV9-120*01	IGKV17-121*01	IGKV17-121*01	IGKV14-100*01	IGKV4-70*01	IGKV9-124*01	IGKV9-124*01	IGKV17-121*01
	IGKV9-120*01	IGKV14-100*01	IGKV9-120*01	IGKV14-100*01	IGKV9-120*01	IGKV9-120*01	IGKV9-120*01 F	IGKV9-120*01 F	IGKV14-100*01	IGKV9-120*01	IGKV14-100*01	IGKV17-121*01	IGKV9-120*01	IGKV17-121*01	IGKV4-91*01	IGKV14-100*01	IGKV4-70*01	IGKV9-124*01	IGKV9-124*01	IGKV17-121*01
	IGKV9-120*01	IGKV14-100*01	IGKV9-120*01	IGKV14-100*01	IGKV9-120*01	IGKV8-30*01	IGKV9-120*01 F	IGKV9-120*01 F	IGKV4-91*01	IGKV9-120*01	IGKV9-120*01	IGKV17-121*01	IGKV14-100*01	IGKV17-121*01	IGKV17-121*01	IGKV14-100*01	IGKV4-70*01	IGKV9-124*01	IGKV9-124*01	IGKV17-121*01
	IGKV9-120*01	IGKV14-100*01	IGKV9-120*01	IGKV14-100*01	IGKV9-120*01	IGKV8-30*01	IGKV9-120*01 F	IGKV9-120*01 F	IGKV14-100*01	IGKV9-120*01	IGKV9-120*01	IGKV17-121*01	IGKV14-100*01	IGKV17-121*01	IGKV17-121*01	IGKV14-100*01	IGKV4-70*01	IGKV9-124*01	IGKV9-124*01	IGKV4-68*01
	IGKV9-120*01	IGKV14-100*01	IGKV9-120*01	IGKV14-100*01	IGKV9-120*01	IGKV8-30*01	IGKV9-120*01 F	IGKV17-121*01 F	IGKV17-121*01	IGKV9-120*01	IGKV9-120*01	IGKV17-121*01	IGKV14-100*01	IGKV17-121*01	IGKV17-121*01	IGKV14-100*01	IGKV4-70*01	IGKV9-124*01	IGKV9-124*01	IGKV17-121*01
	IGKV9-120*01	IGKV14-100*01	IGKV9-120*01	IGKV14-100*01	IGKV9-120*01	IGKV8-30*01	IGKV9-120*01 F	IGKV9-120*01 F	IGKV14-100*01	IGKV9-120*01	IGKV14-100*01	IGKV17-121*01	IGKV14-100*01	IGKV17-121*01	IGKV17-121*01	IGKV14-100*01	IGKV4-70*01	IGKV9-124*01	IGKV9-124*01	IGKV17-121*01
	IGKV9-120*01	IGKV14-100*01	IGKV9-120*01	IGKV14-100*01	IGKV9-120*01	IGKV8-30*01	IGKV9-120*01 F	IGKV9-120*01 F	IGKV14-100*01	IGKV9-120*01	IGKV14-100*01	IGKV17-121*01	IGKV14-100*01	IGKV17-121*01	IGKV17-121*01	IGKV14-100*01	IGKV4-70*01	IGKV9-124*01	IGKV9-124*01	IGKV17-121*01
	IGKV9-120*01	IGKV14-100*01	IGKV9-120*01	IGKV14-100*01	IGKV9-120*01	IGKV8-30*01	IGKV9-120*01 F	IGKV8-24*01 F	IGKV14-100*01	IGKV9-120*01	IGKV9-120*01	IGKV17-121*01	IGKV9-120*01	IGKV17-121*01	IGKV17-121*01	IGKV14-100*01	IGKV4-70*01	IGKV9-124*01	IGKV9-124*01	IGKV17-121*01
	IGKV9-120*01	IGKV14-100*01	IGKV9-120*01	IGKV14-100*01	IGKV9-120*01	IGKV8-30*01	IGKV9-120*01 F	IGKV9-120*01 F	IGKV14-100*01	IGKV9-120*01	IGKV14-100*01	IGKV17-121*01	IGKV14-100*01	IGKV17-121*01	IGKV17-121*01	IGKV14-100*01	IGKV4-70*01	IGKV9-124*01	IGKV9-124*01	IGKV17-121*01
	IGKV9-120*01	IGKV14-100*01	IGKV9-120*01	IGKV14-100*01	IGKV9-120*01	IGKV8-30*01	IGKV9-120*01 F	IGKV9-120*01 F	IGKV14-100*01	IGKV9-120*01	IGKV14-100*01	IGKV17-121*01	IGKV9-120*01	IGKV17-121*01	IGKV17-121*01	IGKV14-100*01	IGKV4-70*01	IGKV9-124*01	IGKV9-124*01	IGKV17-121*01
	IGKV9-120*01	IGKV14-100*01	IGKV9-120*01	IGKV14-100*01	IGKV9-120*01	IGKV9-120*01	IGKV9-120*01 F	IGKV9-120*01 F	IGKV14-100*01	IGKV9-120*01	IGKV14-100*01	IGKV17-121*01	IGKV9-120*01	IGKV17-121*01	IGKV4-91*01	IGKV14-100*01	IGKV4-70*01	IGKV9-124*01	IGKV9-124*01	IGKV17-121*01
	IGKV9-120*01	IGKV14-100*01	IGKV9-120*01	IGKV14-100*01	IGKV9-120*01	IGKV8-30*01	IGKV9-120*01 F	IGKV9-120*01 F	IGKV14-100*01	IGKV9-120*01	IGKV14-100*01	IGKV17-121*01	IGKV9-120*01	IGKV17-121*01	IGKV17-121*01	IGKV14-100*01	IGKV4-70*01	IGKV9-124*01	IGKV9-124*01	IGKV17-121*01
	IGKV9-120*01	IGKV14-100*01	IGKV9-120*01	IGKV14-100*01	IGKV9-120*01	IGKV8-30*01	IGKV9-120*01 F	IGKV9-120*01 F	IGKV1-117*01	IGKV9-120*01	IGKV14-100*01	IGKV17-121*01	IGKV9-120*01	IGKV17-121*01	IGKV17-121*01	IGKV14-100*01	IGKV4-70*01	IGKV9-124*01	IGKV9-124*01	IGKV17-121*01
	IGKV9-120*01	IGKV14-100*01	IGKV9-120*01	IGKV14-100*01	IGKV9-120*01	IGKV8-30*01	IGKV9-120*01 F	IGKV9-120*01 F	IGKV1-135*01	IGKV9-120*01	IGKV14-100*01	IGKV17-121*01	IGKV14-100*01	IGKV17-121*01	IGKV4-91*01	IGKV14-100*01	IGKV4-70*01	IGKV9-124*01	IGKV9-124*01	IGKV17-121*01
	IGKV9-120*01	IGKV14-100*01	IGKV9-120*01	IGKV14-100*01	IGKV9-120*01	IGKV8-30*01	IGKV9-120*01 F	IGKV9-120*01 F	IGKV14-100*01	IGKV9-120*01	IGKV14-100*01	IGKV17-121*01	IGKV14-100*01	IGKV17-121*01	IGKV17-121*01	IGKV14-100*01	IGKV4-70*01	IGKV9-124*01	IGKV9-124*01	IGKV17-121*01
	IGKV9-120*01	IGKV14-100*01	IGKV9-120*01	IGKV14-100*01	IGKV9-120*01	IGKV8-30*01	IGKV9-120*01 F	IGKV9-120*01 F	IGKV14-100*01	IGKV9-120*01	IGKV9-120*01	IGKV17-121*01	IGKV9-120*01	IGKV17-121*01	IGKV4-91*01	IGKV14-100*01	IGKV4-70*01	IGKV9-124*01	IGKV9-124*01	IGKV17-121*01
	IGKV9-120*01	IGKV14-100*01	IGKV9-120*01	IGKV14-100*01	IGKV9-120*01	IGKV9-120*01	IGKV9-120*01 F	IGKV14-111*01 F	IGKV14-100*01	IGKV9-120*01	IGKV14-100*01	IGKV17-121*01	IGKV14-100*01	IGKV17-121*01	IGKV17-121*01	IGKV14-100*01	IGKV4-70*01	IGKV9-124*01	IGKV9-124*01	IGKV17-121*01
	IGKV9-120*01	IGKV14-100*01	IGKV9-120*01	IGKV14-100*01	IGKV9-120*01	IGKV8-30*01	IGKV9-120*01 F	IGKV9-120*01 F	IGKV14-100*01	IGKV9-120*01	IGKV9-120*01	IGKV17-121*01	IGKV9-120*01	IGKV17-121*01	IGKV17-121*01	IGKV14-100*01	IGKV4-70*01	IGKV9-124*01	IGKV9-124*01	IGKV17-121*01
	IGKV9-120*01	IGKV14-100*01	IGKV9-120*01	IGKV14-100*01	IGKV9-120*01	IGKV8-30*01	IGKV9-120*01 F	IGKV9-120*01 F	IGKV14-100*01	IGKV9-120*01	IGKV9-120*01	IGKV17-121*01	IGKV14-100*01	IGKV17-121*01	IGKV17-121*01	IGKV14-100*01	IGKV4-70*01	IGKV9-124*01	IGKV9-124*01	IGKV17-121*01
	IGKV9-120*01	IGKV14-100*01	IGKV9-120*01	IGKV14-100*01	IGKV9-120*01	IGKV8-30*01	IGKV9-120*01 F	IGKV9-120*01 F	IGKV14-100*01	IGKV9-120*01	IGKV9-120*01	IGKV17-121*01	IGKV14-100*01	IGKV17-121*01	IGKV4-91*01	IGKV14-100*01	IGKV4-70*01	IGKV9-124*01	IGKV9-124*01	IGKV17-121*01
	IGKV9-120*01	IGKV14-100*01	IGKV9-120*01	IGKV14-100*01	IGKV9-120*01	IGKV8-30*01	IGKV9-120*01 F	IGKV9-120*01 F	IGKV17-121*01	IGKV9-120*01	IGKV9-120*01	IGKV17-121*01	IGKV9-120*01	IGKV17-121*01	IGKV4-91*01	IGKV14-100*01	IGKV4-70*01	IGKV9-124*01	IGKV9-124*01	IGKV17-121*01
	IGKV9-120*01	IGKV14-100*01	IGKV9-120*01	IGKV14-100*01	IGKV9-120*01	IGKV8-30*01	IGKV9-120*01 F	IGKV14-111*01 F	IGKV14-100*01	IGKV9-120*01	IGKV14-100*01	IGKV17-121*01	IGKV14-100*01	IGKV17-121*01	IGKV17-121*01	IGKV14-100*01	IGKV4-70*01	IGKV9-124*01	IGKV9-124*01	IGKV17-121*01
	IGKV9-120*01	IGKV14-100*01	IGKV9-120*01	IGKV14-100*01	IGKV9-120*01	IGKV8-30*01	IGKV9-120*01 F	IGKV14-111*01 F	IGKV14-100*01	IGKV9-120*01	IGKV14-100*01	IGKV17-121*01	IGKV14-100*01	IGKV17-121*01	IGKV17-121*01	IGKV14-100*01	IGKV4-70*01	IGKV9-124*01	IGKV9-124*01	IGKV17-121*01
	IGKV9-120*01	IGKV14-100*01	IGKV9-120*01	IGKV14-100*01	IGKV9-120*01	IGKV8-30*01	IGKV9-120*01 F	IGKV9-120*01 F	IGKV14-100*01	IGKV9-120*01	IGKV14-100*01	IGKV17-121*01	IGKV14-100*01	IGKV17-121*01	IGKV17-121*01	IGKV14-100*01	IGKV4-70*01	IGKV9-124*01	IGKV9-124*01	IGKV17-121*01
	IGKV9-120*01	IGKV14-100*01	IGKV9-120*01	IGKV14-100*01	IGKV9-120*01	IGKV8-30*01	IGKV9-120*01 F	IGKV14-111*01 F	IGKV14-100*01	IGKV9-120*01	IGKV14-100*01	IGKV17-121*01	IGKV14-100*01	IGKV17-121*01	IGKV17-121*01	IGKV14-100*01	IGKV4-70*01	IGKV9-124*01	IGKV9-124*01	IGKV17-121*01
	IGKV9-120*01	IGKV14-100*01	IGKV9-120*01	IGKV14-100*01	IGKV9-120*01	IGKV8-30*01	IGKV9-120*01 F	IGKV9-120*01 F	IGKV14-100*01	IGKV9-120*01	IGKV14-100*01	IGKV17-121*01	IGKV14-100*01	IGKV17-121*01	IGKV17-121*01	IGKV14-100*01	IGKV4-70*01	IGKV9-124*01	IGKV9-124*01	IGKV17-121*01
	IGKV9-120*01	IGKV14-100*01	IGKV9-120*01	IGKV14-100*01	IGKV9-120*01	IGKV8-30*01	IGKV9-120*01 F	IGKV9-120*01 F	IGKV14-100*01	IGKV9-120*01	IGKV14-100*01	IGKV17-121*01	IGKV9-120*01	IGKV17-121*01	IGKV4-91*01	IGKV14-100*01	IGKV4-70*01	IGKV9-124*01	IGKV9-124*01	IGKV17-121*01
	IGKV9-120*01	IGKV14-100*01	IGKV9-120*01	IGKV14-100*01	IGKV9-120*01	IGKV8-30*01	IGKV9-120*01 F	IGKV9-120*01 F	IGKV14-100*01	IGKV9-120*01	IGKV14-100*01	IGKV17-121*01	IGKV9-120*01	IGKV17-121*01	IGKV4-91*01	IGKV14-100*01	IGKV4-70*01	IGKV9-124*01	IGKV9-124*01	IGKV17-121*01
	IGKV9-120*01	IGKV14-100*01	IGKV9-120*01	IGKV14-100*01	IGKV9-120*01	IGKV9-120*01	IGKV9-120*01 F	IGKV9-120*01 F	IGKV17-121*01	IGKV9-120*01	IGKV14-100*01	IGKV17-121*01	IGKV14-100*01	IGKV17-121*01	IGKV4-91*01	IGKV14-100*01	IGKV4-70*01	IGKV9-124*01	IGKV9-124*01	IGKV17-121*01
	IGKV9-120*01	IGKV14-100*01	IGKV9-120*01	IGKV14-100*01	IGKV9-120*01	IGKV9-120*01	IGKV9-120*01 F	IGKV9-120*01 F	IGKV14-100*01	IGKV9-120*01	IGKV9-120*01	IGKV17-121*01	IGKV14-100*01	IGKV17-121*01	IGKV17-121*01	IGKV14-100*01	IGKV4-70*01	IGKV9-124*01	IGKV9-124*01	IGKV17-121*01
	IGKV9-120*01	IGKV14-100*01	IGKV9-120*01	IGKV14-100*01	IGKV9-120*01	IGKV8-30*01	IGKV9-120*01 F	IGKV14-111*01 F	IGKV14-100*01	IGKV9-120*01	IGKV9-120*01	IGKV17-121*01	IGKV9-120*01	IGKV17-121*01	IGKV4-91*01	IGKV14-100*01	IGKV4-70*01	IGKV9-124*01	IGKV9-124*01	IGKV17-121*01
	IGKV9-120*01	IGKV14-100*01	IGKV9-120*01	IGKV14-100*01	IGKV9-120*01	IGKV8-30*01	IGKV9-120*01 F	IGKV9-120*01 F	IGKV14-100*01	IGKV9-120*01	IGKV9-120*01	IGKV17-121*01	IGKV14-100*01	IGKV17-121*01	IGKV17-121*01	IGKV14-100*01	IGKV4-70*01	IGKV9-124*01	IGKV9-124*01	IGKV17-121*01
	IGKV9-120*01	IGKV14-100*01	IGKV9-120*01	IGKV14-100*01	IGKV9-120*01	IGKV8-30*01	IGKV9-120*01 F	IGKV14-111*01 F	IGKV14-100*01	IGKV9-120*01	IGKV14-100*01	IGKV17-121*01	IGKV14-100*01	IGKV17-121*01	IGKV17-121*01	IGKV14-100*01	IGKV4-70*01	IGKV9-124*01	IGKV9-124*01	IGKV17-121*01
	IGKV9-120*01	IGKV14-100*01	IGKV9-120*01	IGKV14-100*01	IGKV9-120*01	IGKV9-120*01	IGKV9-120*01 F	IGKV9-120*01 F	IGKV14-100*01	IGKV9-120*01	IGKV9-120*01	IGKV17-121*01	IGKV14-100*01	IGKV17-121*01	IGKV17-121*01	IGKV14-100*01	IGKV4-70*01	IGKV9-124*01	IGKV9-124*01	IGKV17-121*01
	IGKV9-120*01	IGKV14-100*01	IGKV9-120*01	IGKV14-100*01	IGKV9-120*01	IGKV8-30*01	IGKV9-120*01 F	IGKV9-120*01 F	IGKV14-100*01	IGKV9-120*01	IGKV14-100*01	IGKV17-121*01	IGKV14-100*01	IGKV17-121*01	IGKV4-91*01	IGKV14-100*01	IGKV4-70*01	IGKV9-124*01	IGKV9-124*01	IGKV17-121*01
	IGKV9-120*01	IGKV14-100*01	IGKV9-120*01	IGKV14-100*01	IGKV9-120*01	IGKV9-120*01	IGKV9-120*01 F	IGKV9-120*01 F	IGKV14-100*01	IGKV9-120*01	IGKV14-100*01	IGKV17-121*01	IGKV9-120*01	IGKV17-121*01	IGKV4-91*01	IGKV14-100*01	IGKV4-70*01	IGKV9-124*01	IGKV9-124*01	IGKV17-121*01
	IGKV9-120*01	IGKV14-100*01	IGKV9-120*01	IGKV14-100*01	IGKV9-120*01	IGKV9-120*01	IGKV9-120*01 F	IGKV9-120*01 F	IGKV14-100*01	IGKV9-120*01	IGKV9-120*01	IGKV17-121*01	IGKV9-120*01	IGKV17-121*01	IGKV17-121*01	IGKV14-100*01	IGKV4-70*01	IGKV9-124*01	IGKV9-124*01	IGKV17-121*01
	IGKV9-120*01	IGKV14-100*01	IGKV9-120*01	IGKV14-100*01	IGKV9-120*01	IGKV8-30*01	IGKV9-120*01 F	IGKV9-120*01 F	IGKV14-100*01	IGKV9-120*01	IGKV14-100*01	IGKV17-121*01	IGKV14-100*01	IGKV17-121*01	IGKV4-91*01	IGKV14-100*01	IGKV4-70*01	IGKV9-124*01	IGKV9-124*01	IGKV17-121*01
	IGKV9-120*01	IGKV14-100*01	IGKV9-120*01	IGKV14-100*01	IGKV9-120*01	IGKV8-30*01	IGKV9-120*01 F	IGKV9-120*01 F	IGKV1-110*01	IGKV9-120*01	IGKV9-120*01	IGKV17-121*01	IGKV14-100*01	IGKV17-121*01	IGKV17-121*01	IGKV14-100*01	IGKV4-70*01	IGKV9-124*01	IGKV9-124*01	IGKV17-121*01
	IGKV9-120*01	IGKV14-100*01	IGKV9-120*01	IGKV14-100*01	IGKV9-120*01	IGKV8-30*01	IGKV9-120*01 F	IGKV9-120*01 F	IGKV14-100*01	IGKV9-120*01	IGKV14-100*01	IGKV17-121*01	IGKV14-100*01	IGKV17-121*01	IGKV17-121*01	IGKV14-100*01	IGKV4-70*01	IGKV9-124*01	IGKV9-124*01	IGKV17-121*01
	IGKV9-120*01	IGKV14-100*01	IGKV9-120*01	IGKV14-100*01	IGKV9-120*01	IGKV8-30*01	IGKV9-120*01 F	IGKV9-120*01 F	IGKV14-100*01	IGKV9-120*01	IGKV9-120*01	IGKV17-121*01	IGKV14-100*01	IGKV17-121*01	IGKV17-121*01	IGKV14-100*01	IGKV4-70*01	IGKV9-124*01	IGKV9-124*01	IGKV17-121*01
	IGKV9-120*01	IGKV14-100*01	IGKV9-120*01	IGKV14-100*01	IGKV9-120*01	IGKV8-30*01	IGKV9-120*01 F	IGKV9-120*01 F	IGKV14-100*01	IGKV9-120*01	IGKV9-120*01	IGKV17-121*01	IGKV14-100*01	IGKV17-121*01	IGKV4-91*01	IGKV14-100*01	IGKV4-70*01	IGKV9-124*01	IGKV9-124*01	IGKV17-121*01
	IGKV9-120*01	IGKV14-100*01	IGKV9-120*01	IGKV14-100*01	IGKV9-120*01	IGKV8-30*01	IGKV9-120*01 F	IGKV9-120*01 F	IGKV14-100*01	IGKV9-120*01	IGKV9-120*01	IGKV17-121*01	IGKV14-100*01	IGKV17-121*01	IGKV17-121*01	IGKV14-100*01	IGKV4-70*01	IGKV9-124*01	IGKV9-124*01	IGKV17-121*01
	IGKV9-120*01	IGKV14-100*01	IGKV9-120*01	IGKV14-100*01	IGKV9-120*01	IGKV8-30*01	IGKV9-120*01 F	IGKV9-120*01 F	IGKV14-100*01	IGKV9-120*01	IGKV14-100*01	IGKV17-121*01	IGKV14-100*01	IGKV17-121*01	IGKV17-121*01	IGKV14-100*01	IGKV4-70*01	IGKV9-124*01	IGKV9-124*01	IGKV17-121*01
	IGKV9-120*01	IGKV14-100*01	IGKV9-120*01	IGKV14-100*01	IGKV9-120*01	IGKV8-30*01	IGKV9-120*01 F	IGKV9-120*01 F	IGKV14-100*01	IGKV9-120*01	IGKV9-120*01	IGKV17-121*01	IGKV14-100*01	IGKV17-121*01	IGKV17-121*01	IGKV14-100*01	IGKV4-70*01	IGKV9-124*01	IGKV9-124*01	IGKV17-121*01
	IGKV9-120*01	IGKV14-100*01	IGKV9-120*01	IGKV14-100*01	IGKV9-120*01	IGKV8-30*01	IGKV9-120*01 F	IGKV9-120*01 F	IGKV14-100*01	IGKV9-120*01	IGKV9-120*01	IGKV17-121*01	IGKV9-120*01	IGKV17-121*01	IGKV17-121*01	IGKV14-100*01	IGKV4-70*01	IGKV9-124*01	IGKV9-124*01	IGKV17-121*01
	IGKV9-120*01	IGKV14-100*01	IGKV9-120*01	IGKV14-100*01	IGKV9-120*01	IGKV8-30*01	IGKV9-120*01 F	IGKV14-111*01 F	IGKV14-100*01	IGKV9-120*01	IGKV14-100*01	IGKV17-121*01	IGKV14-100*01	IGKV17-121*01	IGKV17-121*01	IGKV14-100*01	IGKV4-70*01	IGKV9-124*01	IGKV9-124*01	IGKV17-121*01
	IGKV9-120*01	IGKV14-100*01	IGKV9-120*01	IGKV14-100*01	IGKV9-120*01	IGKV8-30*01	IGKV9-120*01 F	IGKV9-120*01 F	IGKV14-100*01	IGKV9-120*01	IGKV9-120*01	IGKV17-121*01	IGKV9-120*01	IGKV17-121*01	IGKV4-91*01	IGKV14-100*01	IGKV4-70*01	IGKV9-124*01	IGKV9-124*01	IGKV17-121*01
	IGKV9-120*01	IGKV14-100*01	IGKV9-120*01	IGKV14-100*01	IGKV9-120*01	IGKV8-30*01	IGKV9-120*01 F	IGKV9-120*01 F	IGKV14-100*01	IGKV9-120*01	IGKV9-120*01	IGKV17-121*01	IGKV14-100*01	IGKV17-121*01	IGKV4-91*01	IGKV14-100*01	IGKV4-70*01	IGKV9-124*01	IGKV9-124*01	IGKV17-121*01
	IGKV9-120*01	IGKV14-100*01	IGKV9-120*01	IGKV14-100*01	IGKV9-120*01	IGKV8-30*01	IGKV9-120*01 F	IGKV9-120*01 F	IGKV1-135*01	IGKV9-120*01	IGKV9-120*01	IGKV17-121*01	IGKV14-100*01	IGKV17-121*01	IGKV17-121*01	IGKV14-100*01	IGKV4-70*01	IGKV9-124*01	IGKV9-124*01	IGKV17-121*01
	IGKV9-120*01	IGKV14-100*01	IGKV9-120*01	IGKV14-100*01	IGKV9-120*01	IGKV8-30*01	IGKV9-120*01 F	IGKV9-120*01 F	IGKV3-4*01	IGKV9-120*01	IGKV14-100*01	IGKV17-121*01	IGKV9-120*01	IGKV17-121*01	IGKV17-121*01	IGKV14-100*01	IGKV4-70*01	IGKV9-124*01	IGKV9-124*01	IGKV17-121*01
	IGKV9-120*01	IGKV14-100*01	IGKV9-120*01	IGKV14-100*01	IGKV9-120*01	IGKV8-30*01	IGKV9-120*01 F	IGKV9-120*01 F	IGKV14-100*01	IGKV9-120*01	IGKV14-100*01	IGKV17-121*01	IGKV14-100*01	IGKV17-121*01	IGKV17-121*01	IGKV14-100*01	IGKV4-70*01	IGKV9-124*01	IGKV9-124*01	IGKV4-68*01
	IGKV9-120*01	IGKV14-100*01	IGKV9-120*01	IGKV14-100*01	IGKV9-120*01	IGKV8-30*01	IGKV9-120*01 F	IGKV9-120*01 F	IGKV14-100*01	IGKV9-120*01	IGKV14-100*01	IGKV17-121*01	IGKV14-100*01	IGKV17-121*01	IGKV17-121*01	IGKV14-100*01	IGKV4-70*01	IGKV9-124*01	IGKV9-124*01	IGKV17-121*01
	IGKV9-120*01	IGKV14-100*01	IGKV9-120*01	IGKV14-100*01	IGKV9-120*01	IGKV8-30*01	IGKV9-120*01 F	IGKV9-120*01 F	IGKV14-100*01	IGKV9-120*01	IGKV9-120*01	IGKV17-121*01	IGKV14-100*01	IGKV17-121*01	IGKV17-121*01	IGKV14-100*01	IGKV4-70*01	IGKV9-124*01	IGKV9-124*01	IGKV17-121*01
	IGKV9-120*01	IGKV14-100*01	IGKV9-120*01	IGKV14-100*01	IGKV9-120*01	IGKV9-120*01	IGKV9-120*01 F	IGKV1-135*01 F	IGKV14-100*01	IGKV9-120*01	IGKV9-120*01	IGKV17-121*01	IGKV14-100*01	IGKV17-121*01	IGKV17-121*01	IGKV14-100*01	IGKV4-70*01	IGKV9-124*01	IGKV9-124*01	IGKV17-121*01
	IGKV9-120*01	IGKV14-100*01	IGKV9-120*01	IGKV14-100*01	IGKV9-120*01	IGKV8-30*01	IGKV9-120*01 F	IGKV14-111*01 F	IGKV1-135*01	IGKV9-120*01	IGKV14-100*01	IGKV17-121*01	IGKV14-100*01	IGKV17-121*01	IGKV4-91*01	IGKV14-100*01	IGKV4-70*01	IGKV9-124*01	IGKV9-124*01	IGKV17-121*01
	IGKV9-120*01	IGKV14-100*01	IGKV9-120*01	IGKV14-100*01	IGKV9-120*01	IGKV9-120*01	IGKV9-120*01 F	IGKV14-111*01 F	IGKV14-100*01	IGKV9-120*01	IGKV9-120*01	IGKV17-121*01	IGKV14-100*01	IGKV17-121*01	IGKV17-121*01	IGKV14-100*01	IGKV4-70*01	IGKV9-124*01	IGKV9-124*01	IGKV17-121*01
	IGKV9-120*01	IGKV14-100*01	IGKV9-120*01	IGKV14-100*01	IGKV9-120*01	IGKV8-30*01	IGKV9-120*01 F	IGKV9-120*01 F	IGKV14-100*01	IGKV9-120*01	IGKV9-120*01	IGKV17-121*01	IGKV14-100*01	IGKV17-121*01	IGKV17-121*01	IGKV14-100*01	IGKV4-70*01	IGKV9-124*01	IGKV9-124*01	IGKV17-121*01
	IGKV9-120*01	IGKV14-100*01	IGKV9-120*01	IGKV14-100*01	IGKV9-120*01	IGKV9-120*01	IGKV9-120*01 F	IGKV9-120*01 F	IGKV14-100*01	IGKV9-120*01	IGKV14-100*01	IGKV17-121*01	IGKV14-100*01	IGKV17-121*01	IGKV17-121*01	IGKV14-100*01	IGKV4-70*01	IGKV9-124*01	IGKV9-124*01	IGKV17-121*01
	IGKV9-120*01	IGKV14-100*01	IGKV9-120*01	IGKV14-100*01	IGKV9-120*01	IGKV9-120*01	IGKV9-120*01 F	IGKV14-111*01 F	IGKV14-111*01	IGKV9-120*01	IGKV14-100*01	IGKV17-121*01	IGKV9-120*01	IGKV17-121*01	IGKV4-91*01	IGKV14-100*01	IGKV4-70*01	IGKV9-124*01	IGKV9-124*01	IGKV17-121*01
	IGKV9-120*01	IGKV14-100*01	IGKV9-120*01	IGKV14-100*01	IGKV9-120*01	IGKV9-120*01	IGKV9-120*01 F	IGKV9-120*01 F	IGKV14-100*01	IGKV9-120*01	IGKV14-100*01	IGKV17-121*01	IGKV9-120*01	IGKV17-121*01	IGKV17-121*01	IGKV14-100*01	IGKV4-70*01	IGKV9-124*01	IGKV9-124*01	IGKV17-121*01
	IGKV9-120*01	IGKV14-100*01	IGKV9-120*01	IGKV14-100*01	IGKV9-120*01	IGKV8-30*01	IGKV9-120*01 F	IGKV9-120*01 F	IGKV14-100*01	IGKV9-120*01	IGKV14-100*01	IGKV17-121*01	IGKV14-100*01	IGKV17-121*01	IGKV17-121*01	IGKV14-100*01	IGKV4-70*01	IGKV9-124*01	IGKV9-124*01	IGKV17-121*01
	IGKV9-120*01	IGKV14-100*01	IGKV9-120*01	IGKV14-100*01	IGKV9-120*01	IGKV8-30*01	IGKV9-120*01 F	IGKV9-120*01 F	IGKV14-100*01	IGKV9-120*01	IGKV14-100*01	IGKV17-121*01	IGKV14-100*01	IGKV17-121*01	IGKV17-121*01	IGKV14-100*01	IGKV4-70*01	IGKV9-124*01	IGKV9-124*01	IGKV17-121*01
	IGKV9-120*01	IGKV14-100*01	IGKV9-120*01	IGKV14-100*01	IGKV9-120*01	IGKV8-30*01	IGKV9-120*01 F	IGKV9-120*01 F	IGKV14-100*01	IGKV9-120*01	IGKV14-100*01	IGKV17-121*01	IGKV14-100*01	IGKV17-121*01	IGKV17-121*01	IGKV14-100*01	IGKV4-70*01	IGKV9-124*01	IGKV9-124*01	IGKV17-121*01
	IGKV9-120*01	IGKV14-100*01	IGKV9-120*01	IGKV14-100*01	IGKV9-120*01	IGKV9-120*01	IGKV9-120*01 F	IGKV9-120*01 F	IGKV14-100*01	IGKV9-120*01	IGKV14-100*01	IGKV17-121*01	IGKV9-120*01	IGKV17-121*01	IGKV17-121*01	IGKV14-100*01	IGKV4-70*01	IGKV9-124*01	IGKV9-124*01	IGKV17-121*01
	IGKV9-120*01	IGKV14-100*01	IGKV9-120*01	IGKV14-100*01	IGKV9-120*01	IGKV8-30*01	IGKV9-120*01 F	IGKV9-120*01 F	IGKV14-100*01	IGKV9-120*01	IGKV9-120*01	IGKV17-121*01	IGKV14-100*01	IGKV17-121*01	IGKV17-121*01	IGKV14-100*01	IGKV4-70*01	IGKV9-124*01	IGKV9-124*01	IGKV17-121*01
	IGKV9-120*01	IGKV14-100*01	IGKV9-120*01	IGKV14-100*01	IGKV9-120*01	IGKV8-30*01	IGKV9-120*01 F	IGKV9-120*01 F	IGKV14-100*01	IGKV9-120*01	IGKV9-120*01	IGKV17-121*01	IGKV14-100*01	IGKV17-121*01	IGKV4-91*01	IGKV14-100*01	IGKV4-70*01	IGKV9-124*01	IGKV9-124*01	IGKV17-121*01
	IGKV9-120*01	IGKV14-100*01	IGKV9-120*01	IGKV14-100*01	IGKV9-120*01	IGKV8-30*01	IGKV9-120*01 F	IGKV9-120*01 F	IGKV1-135*01	IGKV9-120*01	IGKV9-120*01	IGKV17-121*01	IGKV14-100*01	IGKV17-121*01	IGKV17-121*01	IGKV14-100*01	IGKV4-70*01	IGKV9-124*01	IGKV9-124*01	IGKV17-121*01
	IGKV9-120*01	IGKV14-100*01	IGKV9-120*01	IGKV14-100*01	IGKV9-120*01	IGKV9-120*01	IGKV9-120*01 F	IGKV9-120*01 F	IGKV14-100*01	IGKV9-120*01	IGKV9-120*01	IGKV17-121*01	IGKV14-100*01	IGKV17-121*01	IGKV4-91*01	IGKV14-100*01	IGKV4-70*01	IGKV9-124*01	IGKV9-124*01	IGKV17-121*01
	IGKV9-120*01	IGKV14-100*01	IGKV9-120*01	IGKV14-100*01	IGKV9-120*01	IGKV9-120*01	IGKV9-120*01 F	IGKV9-120*01 F	IGKV14-100*01	IGKV9-120*01	IGKV9-120*01	IGKV17-121*01	IGKV14-100*01	IGKV17-121*01	IGKV17-121*01	IGKV14-100*01	IGKV4-70*01	IGKV9-124*01	IGKV9-124*01	IGKV17-121*01
	IGKV9-120*01	IGKV14-100*01	IGKV9-120*01	IGKV14-100*01	IGKV9-120*01	IGKV8-30*01	IGKV9-120*01 F	IGKV9-120*01 F	IGKV14-100*01	IGKV9-120*01	IGKV9-120*01	IGKV17-121*01	IGKV9-120*01	IGKV17-121*01	IGKV17-121*01	IGKV14-100*01	IGKV4-70*01	IGKV9-124*01	IGKV9-124*01	IGKV17-121*01
	IGKV9-120*01	IGKV14-100*01	IGKV9-120*01	IGKV14-100*01	IGKV9-120*01	IGKV8-30*01	IGKV9-120*01 F	IGKV9-120*01 F	IGKV4-91*01	IGKV9-120*01	IGKV9-120*01	IGKV17-121*01	IGKV9-120*01	IGKV17-121*01	IGKV4-91*01	IGKV14-100*01	IGKV4-70*01	IGKV9-124*01	IGKV9-124*01	IGKV17-121*01
	IGKV9-120*01	IGKV14-100*01	IGKV9-120*01	IGKV14-100*01	IGKV9-120*01	IGKV8-30*01	IGKV9-120*01 F	IGKV9-120*01 F	IGKV14-100*01	IGKV9-120*01	IGKV14-100*01	IGKV17-121*01	IGKV14-100*01	IGKV17-121*01	IGKV17-121*01	IGKV14-100*01	IGKV4-70*01	IGKV9-124*01	IGKV9-124*01	IGKV17-121*01
	IGKV9-120*01	IGKV14-100*01	IGKV9-120*01	IGKV14-100*01	IGKV9-120*01	IGKV8-30*01	IGKV9-120*01 F	IGKV9-120*01 F	IGKV14-100*01	IGKV9-120*01	IGKV9-120*01	IGKV17-121*01	IGKV14-100*01	IGKV17-121*01	IGKV4-91*01	IGKV14-100*01	IGKV4-70*01	IGKV9-124*01	IGKV9-124*01	IGKV17-121*01
	IGKV9-120*01	IGKV14-100*01	IGKV9-120*01	IGKV14-100*01	IGKV9-120*01	IGKV8-30*01	IGKV9-120*01 F	IGKV9-120*01 F	IGKV14-100*01	IGKV9-120*01	IGKV14-100*01	IGKV17-121*01	IGKV14-100*01	IGKV17-121*01	IGKV17-121*01	IGKV14-100*01	IGKV4-70*01		IGKV9-124*01	IGKV17-121*01
	IGKV9-120*01	IGKV14-100*01	IGKV9-120*01	IGKV14-100*01	IGKV9-120*01	IGKV8-30*01	IGKV9-120*01 F	IGKV9-120*01 F	IGKV14-100*01	IGKV9-120*01	IGKV9-120*01	IGKV17-121*01	IGKV14-100*01	IGKV17-121*01	IGKV4-91*01	IGKV14-100*01	IGKV4-70*01		IGKV9-124*01	IGKV17-121*01
	IGKV9-120*01	IGKV14-100*01	IGKV9-120*01	IGKV14-100*01	IGKV9-120*01	IGKV8-30*01	IGKV9-120*01 F	IGKV9-120*01 F	IGKV14-100*01	IGKV9-120*01	IGKV9-120*01	IGKV17-121*01	IGKV14-100*01	IGKV17-121*01	IGKV17-121*01	IGKV14-100*01	IGKV4-70*01		IGKV9-124*01	IGKV17-121*01
	IGKV9-120*01	IGKV14-100*01	IGKV9-120*01	IGKV14-100*01	IGKV9-120*01	IGKV8-30*01	IGKV9-120*01 F	IGKV9-120*01 F	IGKV14-100*01	IGKV9-120*01	IGKV9-120*01	IGKV17-121*01	IGKV9-120*01	IGKV17-121*01	IGKV17-121*01	IGKV14-100*01	IGKV4-70*01		IGKV9-124*01	IGKV17-121*01
	IGKV9-120*01	IGKV14-100*01	IGKV9-120*01	IGKV14-100*01	IGKV9-120*01	IGKV8-30*01	IGKV9-120*01 F	IGKV9-120*01 F	IGKV14-100*01	IGKV9-120*01	IGKV9-120*01	IGKV17-121*01	IGKV14-100*01	IGKV17-121*01	IGKV17-121*01	IGKV14-100*01	IGKV4-70*01		IGKV9-124*01	IGKV17-121*01
	IGKV9-120*01	IGKV14-100*01	IGKV9-120*01	IGKV14-100*01	IGKV9-120*01	IGKV8-30*01	IGKV9-120*01 F	IGKV9-120*01 F	IGKV14-100*01	IGKV9-120*01	IGKV9-120*01	IGKV17-121*01	IGKV9-120*01	IGKV17-121*01	IGKV4-91*01	IGKV14-100*01	IGKV4-70*01		IGKV9-124*01	IGKV17-121*01
	IGKV9-120*01	IGKV14-100*01	IGKV9-120*01	IGKV14-100*01	IGKV9-120*01	IGKV9-120*01	IGKV9-120*01 F	IGKV9-120*01 F	IGKV14-100*01	IGKV9-120*01	IGKV9-120*01	IGKV17-121*01	IGKV14-100*01	IGKV17-121*01	IGKV4-91*01	IGKV14-100*01	IGKV4-70*01		IGKV9-124*01	IGKV17-121*01
	IGKV9-120*01	IGKV14-100*01	IGKV9-120*01	IGKV14-100*01	IGKV9-120*01	IGKV8-30*01	IGKV9-120*01 F	IGKV14-111*01 F	IGKV14-100*01	IGKV9-120*01	IGKV14-100*01	IGKV17-121*01	IGKV14-100*01	IGKV17-121*01	IGKV4-91*01	IGKV14-100*01	IGKV4-70*01		IGKV9-124*01	IGKV17-121*01
	IGKV9-120*01	IGKV14-100*01	IGKV9-120*01	IGKV14-100*01	IGKV9-120*01	IGKV9-120*01	IGKV9-120*01 F	IGKV14-111*01 F	IGKV14-100*01	IGKV9-120*01	IGKV9-120*01	IGKV17-121*01	IGKV9-120*01	IGKV17-121*01	IGKV4-91*01	IGKV14-100*01	IGKV4-70*01		IGKV9-124*01	IGKV17-121*01
	IGKV9-120*01	IGKV14-100*01	IGKV9-120*01	IGKV14-100*01	IGKV9-120*01	IGKV8-30*01	IGKV9-120*01 F	IGKV9-120*01 F	IGKV1-135*01	IGKV9-120*01	IGKV14-100*01	IGKV17-121*01	IGKV14-100*01	IGKV17-121*01	IGKV17-121*01	IGKV14-100*01	IGKV4-70*01		IGKV9-124*01	IGKV17-121*01
	IGKV9-120*01	IGKV14-100*01	IGKV9-120*01	IGKV14-100*01	IGKV9-120*01	IGKV9-120*01	IGKV9-120*01 F	IGKV9-120*01 F	IGKV14-100*01	IGKV9-120*01	IGKV14-100*01	IGKV17-121*01	IGKV14-100*01	IGKV17-121*01	IGKV17-121*01	IGKV14-100*01	IGKV4-70*01		IGKV9-124*01	IGKV17-121*01
	IGKV9-120*01	IGKV14-100*01	IGKV9-120*01	IGKV14-100*01	IGKV9-120*01	IGKV8-30*01	IGKV9-120*01 F	IGKV9-120*01 F	IGKV14-100*01	IGKV9-120*01	IGKV14-100*01	IGKV17-121*01	IGKV9-120*01	IGKV17-121*01	IGKV17-121*01	IGKV14-100*01	IGKV4-70*01		IGKV9-124*01	IGKV17-121*01
	IGKV9-120*01	IGKV14-100*01	IGKV9-120*01	IGKV14-100*01	IGKV9-120*01	IGKV8-30*01	IGKV9-120*01 F	IGKV9-120*01 F	IGKV14-100*01	IGKV9-120*01	IGKV9-120*01	IGKV17-121*01	IGKV14-100*01	IGKV17-121*01	IGKV4-91*01	IGKV14-100*01	IGKV4-70*01		IGKV9-124*01	IGKV17-121*01
	IGKV9-120*01	IGKV14-100*01	IGKV9-120*01	IGKV14-100*01	IGKV9-120*01	IGKV9-120*01	IGKV9-120*01 F	IGKV9-120*01 F	IGKV14-100*01	IGKV9-120*01	IGKV14-100*01	IGKV17-121*01	IGKV14-100*01	IGKV17-121*01	IGKV17-121*01	IGKV14-100*01	IGKV4-70*01		IGKV9-124*01	IGKV17-121*01
	IGKV9-120*01	IGKV14-100*01	IGKV9-120*01	IGKV14-100*01	IGKV9-120*01	IGKV8-30*01	IGKV9-120*01 F	IGKV9-120*01 F	IGKV14-100*01	IGKV9-120*01	IGKV9-120*01	IGKV17-121*01	IGKV14-100*01	IGKV17-121*01	IGKV17-121*01	IGKV14-100*01	IGKV4-70*01		IGKV9-124*01	IGKV17-121*01
	IGKV9-120*01	IGKV14-100*01	IGKV9-120*01	IGKV14-100*01	IGKV9-120*01	IGKV9-120*01	IGKV9-120*01 F	IGKV9-120*01 F	IGKV14-100*01	IGKV9-120*01	IGKV9-120*01	IGKV17-121*01	IGKV14-100*01	IGKV17-121*01	IGKV17-121*01	IGKV14-100*01	IGKV4-70*01		IGKV9-124*01	IGKV17-121*01
	IGKV9-120*01	IGKV14-100*01	IGKV9-120*01	IGKV14-100*01	IGKV9-120*01	IGKV9-120*01	IGKV9-120*01 F	IGKV9-120*01 F	IGKV14-100*01	IGKV9-120*01	IGKV9-120*01	IGKV17-121*01	IGKV9-120*01	IGKV17-121*01	IGKV17-121*01	IGKV14-100*01	IGKV4-70*01		IGKV9-124*01	IGKV17-121*01
	IGKV9-120*01	IGKV14-100*01	IGKV9-120*01	IGKV14-100*01	IGKV9-120*01	IGKV9-120*01	IGKV9-120*01 F	IGKV14-111*01 F	IGKV14-100*01	IGKV9-120*01	IGKV9-120*01	IGKV17-121*01	IGKV14-100*01	IGKV17-121*01	IGKV17-121*01	IGKV14-100*01	IGKV4-70*01		IGKV9-124*01	IGKV17-121*01
	IGKV9-120*01	IGKV14-100*01	IGKV9-120*01	IGKV14-100*01	IGKV9-120*01	IGKV9-120*01	IGKV9-120*01 F	IGKV9-120*01 F	IGKV14-100*01	IGKV9-120*01	IGKV9-120*01	IGKV17-121*01	IGKV14-100*01	IGKV17-121*01	IGKV17-121*01	IGKV14-100*01	IGKV4-70*01		IGKV9-124*01	IGKV17-121*01
	IGKV9-120*01	IGKV14-100*01	IGKV9-120*01	IGKV14-100*01	IGKV9-120*01	IGKV8-30*01	IGKV9-120*01 F	IGKV9-120*01 F	IGKV14-100*01	IGKV9-120*01	IGKV9-120*01	IGKV17-121*01	IGKV14-100*01	IGKV17-121*01	IGKV17-121*01	IGKV14-100*01	IGKV4-70*01		IGKV9-124*01	IGKV17-121*01
	IGKV9-120*01	IGKV14-100*01	IGKV9-120*01	IGKV14-100*01	IGKV9-120*01	IGKV8-30*01	IGKV9-120*01 F	IGKV9-120*01 F	IGKV14-100*01	IGKV9-120*01	IGKV14-100*01	IGKV17-121*01	IGKV14-100*01	IGKV17-121*01	IGKV17-121*01	IGKV14-100*01	IGKV4-70*01		IGKV9-124*01	IGKV17-121*01
	IGKV9-120*01	IGKV14-100*01	IGKV9-120*01	IGKV14-100*01	IGKV9-120*01	IGKV8-30*01	IGKV9-120*01 F	IGKV9-120*01 F	IGKV14-100*01	IGKV9-120*01	IGKV9-120*01	IGKV17-121*01	IGKV14-100*01	IGKV17-121*01	IGKV4-91*01	IGKV14-100*01	IGKV4-70*01		IGKV9-124*01	IGKV4-68*01
	IGKV9-120*01	IGKV14-100*01	IGKV9-120*01	IGKV14-100*01	IGKV9-120*01	IGKV8-30*01	IGKV9-120*01 F	IGKV9-120*01 F	IGKV14-100*01	IGKV9-120*01	IGKV9-120*01	IGKV17-121*01	IGKV14-100*01	IGKV17-121*01	IGKV17-121*01	IGKV14-100*01	IGKV4-70*01		IGKV9-124*01	IGKV17-121*01
	IGKV9-120*01	IGKV14-100*01	IGKV9-120*01	IGKV14-100*01	IGKV9-120*01	IGKV8-30*01	IGKV9-120*01 F	IGKV9-120*01 F	IGKV14-100*01	IGKV9-120*01	IGKV14-100*01	IGKV17-121*01	IGKV14-100*01	IGKV17-121*01	IGKV17-121*01	IGKV14-100*01	IGKV4-70*01		IGKV9-124*01	IGKV17-121*01
	IGKV9-120*01	IGKV14-100*01	IGKV9-120*01	IGKV14-100*01	IGKV9-120*01	IGKV8-30*01	IGKV9-120*01 F	IGKV9-120*01 F	IGKV1-135*01	IGKV9-120*01	IGKV14-100*01	IGKV17-121*01	IGKV14-100*01	IGKV17-121*01	IGKV17-121*01	IGKV14-100*01	IGKV4-70*01		IGKV9-124*01	IGKV17-121*01
	IGKV9-120*01	IGKV14-100*01	IGKV9-120*01	IGKV14-100*01	IGKV9-120*01	IGKV8-30*01	IGKV9-120*01 F	IGKV9-120*01 F	IGKV14-100*01	IGKV9-120*01	IGKV14-100*01	IGKV17-121*01	IGKV14-100*01	IGKV17-121*01	IGKV17-121*01	IGKV14-100*01	IGKV4-70*01		IGKV9-124*01	IGKV17-121*01
	IGKV9-120*01	IGKV14-100*01	IGKV9-120*01	IGKV14-100*01	IGKV9-120*01	IGKV9-120*01	IGKV9-120*01 F	IGKV9-120*01 F	IGKV14-100*01	IGKV9-120*01	IGKV9-120*01	IGKV17-121*01	IGKV14-100*01	IGKV17-121*01	IGKV4-91*01	IGKV14-100*01	IGKV4-70*01		IGKV9-124*01	IGKV17-121*01
	IGKV9-120*01	IGKV14-100*01	IGKV9-120*01	IGKV14-100*01	IGKV9-120*01	IGKV8-30*01	IGKV9-120*01 F	IGKV9-120*01 F	IGKV17-121*01	IGKV9-120*01	IGKV14-100*01	IGKV17-121*01	IGKV14-100*01	IGKV17-121*01	IGKV17-121*01	IGKV14-100*01	IGKV4-70*01		IGKV9-124*01	IGKV17-121*01
	IGKV9-120*01	IGKV14-100*01	IGKV9-120*01	IGKV14-100*01	IGKV9-120*01	IGKV8-30*01	IGKV9-120*01 F	IGKV9-120*01 F	IGKV14-100*01	IGKV9-120*01	IGKV9-120*01	IGKV17-121*01	IGKV14-100*01	IGKV17-121*01	IGKV17-121*01	IGKV14-100*01	IGKV4-70*01		IGKV9-124*01	IGKV17-121*01
	IGKV9-120*01	IGKV14-100*01	IGKV9-120*01	IGKV14-100*01	IGKV9-120*01	IGKV8-30*01	IGKV9-120*01 F	IGKV9-120*01 F	IGKV14-100*01	IGKV9-120*01	IGKV14-100*01	IGKV17-121*01	IGKV14-100*01	IGKV17-121*01	IGKV4-91*01	IGKV14-100*01	IGKV4-70*01		IGKV9-124*01	IGKV17-121*01
	IGKV9-120*01	IGKV14-100*01	IGKV9-120*01	IGKV14-100*01	IGKV9-120*01	IGKV8-30*01	IGKV9-120*01 F	IGKV9-120*01 F	IGKV14-100*01	IGKV9-120*01	IGKV14-100*01	IGKV17-121*01	IGKV9-120*01	IGKV17-121*01	IGKV4-91*01	IGKV14-100*01	IGKV4-70*01		IGKV9-124*01	IGKV17-121*01
	IGKV9-120*01	IGKV14-100*01	IGKV9-120*01	IGKV14-100*01	IGKV9-120*01	IGKV9-120*01	IGKV9-120*01 F	IGKV9-120*01 F	IGKV14-100*01	IGKV9-120*01	IGKV9-120*01	IGKV17-121*01	IGKV14-100*01	IGKV17-121*01	IGKV17-121*01	IGKV14-100*01	IGKV4-70*01		IGKV9-124*01	IGKV17-121*01
	IGKV9-120*01	IGKV14-100*01	IGKV9-120*01	IGKV14-100*01	IGKV9-120*01	IGKV8-30*01	IGKV9-120*01 F	IGKV9-120*01 F	IGKV14-100*01	IGKV9-120*01	IGKV9-120*01	IGKV17-121*01	IGKV9-120*01	IGKV17-121*01	IGKV17-121*01	IGKV14-100*01	IGKV4-70*01		IGKV9-124*01	IGKV17-121*01
	IGKV9-120*01	IGKV14-100*01	IGKV9-120*01	IGKV14-100*01	IGKV9-120*01	IGKV8-30*01	IGKV9-120*01 F	IGKV9-120*01 F	IGKV14-100*01	IGKV9-120*01	IGKV14-100*01	IGKV17-121*01	IGKV14-100*01	IGKV17-121*01	IGKV17-121*01	IGKV14-100*01	IGKV4-70*01		IGKV9-124*01	IGKV17-121*01
	IGKV9-120*01	IGKV14-100*01	IGKV9-120*01	IGKV14-100*01	IGKV9-120*01	IGKV9-120*01	IGKV9-120*01 F	IGKV9-120*01 F	IGKV14-100*01	IGKV9-120*01	IGKV9-120*01	IGKV17-121*01	IGKV14-100*01	IGKV17-121*01	IGKV17-121*01	IGKV14-100*01	IGKV4-70*01		IGKV9-124*01	IGKV17-121*01
	IGKV9-120*01	IGKV14-100*01	IGKV9-120*01	IGKV14-100*01	IGKV9-120*01	IGKV9-120*01	IGKV9-120*01 F	IGKV9-120*01 F	IGKV14-100*01	IGKV9-120*01	IGKV14-100*01	IGKV17-121*01	IGKV14-100*01	IGKV17-121*01	IGKV4-91*01	IGKV14-100*01	IGKV4-70*01		IGKV9-124*01	IGKV17-121*01
	IGKV9-120*01	IGKV14-100*01	IGKV9-120*01	IGKV14-100*01	IGKV9-120*01	IGKV8-30*01	IGKV9-120*01 F	IGKV9-120*01 F	IGKV14-100*01	IGKV9-120*01	IGKV9-120*01	IGKV17-121*01	IGKV14-100*01	IGKV17-121*01	IGKV17-121*01	IGKV14-100*01	IGKV4-70*01		IGKV9-124*01	IGKV17-121*01
	IGKV9-120*01	IGKV14-100*01	IGKV9-120*01	IGKV14-100*01	IGKV9-120*01	IGKV8-30*01	IGKV9-120*01 F	IGKV1-135*01 F	IGKV14-100*01	IGKV9-120*01	IGKV14-100*01	IGKV17-121*01	IGKV14-100*01	IGKV17-121*01	IGKV17-121*01	IGKV14-100*01	IGKV4-70*01		IGKV9-124*01	IGKV17-121*01
	IGKV9-120*01	IGKV14-100*01	IGKV9-120*01	IGKV14-100*01	IGKV9-120*01	IGKV8-30*01	IGKV9-120*01 F	IGKV9-120*01 F	IGKV14-100*01	IGKV9-120*01	IGKV9-120*01	IGKV17-121*01	IGKV14-100*01	IGKV17-121*01	IGKV17-121*01	IGKV14-100*01	IGKV4-70*01		IGKV9-124*01	IGKV4-68*01
	IGKV9-120*01	IGKV14-100*01	IGKV9-120*01	IGKV14-100*01	IGKV9-120*01	IGKV9-120*01	IGKV9-120*01 F	IGKV9-120*01 F	IGKV3-4*01	IGKV9-120*01	IGKV14-100*01	IGKV17-121*01	IGKV14-100*01	IGKV17-121*01	IGKV17-121*01	IGKV14-100*01	IGKV4-70*01		IGKV9-124*01	IGKV17-121*01
	IGKV9-120*01	IGKV14-100*01	IGKV9-120*01	IGKV14-100*01	IGKV9-120*01	IGKV8-30*01	IGKV9-120*01 F	IGKV9-120*01 F	IGKV14-100*01	IGKV9-120*01	IGKV14-100*01	IGKV17-121*01	IGKV14-100*01	IGKV17-121*01	IGKV4-91*01	IGKV14-100*01	IGKV4-70*01		IGKV9-124*01	IGKV17-121*01
	IGKV9-120*01	IGKV14-100*01	IGKV9-120*01	IGKV14-100*01	IGKV9-120*01	IGKV9-120*01	IGKV9-120*01 F	IGKV14-111*01 F	IGKV14-100*01	IGKV9-120*01	IGKV14-100*01	IGKV17-121*01	IGKV9-120*01	IGKV17-121*01	IGKV17-121*01	IGKV14-100*01	IGKV4-70*01		IGKV9-124*01	IGKV17-121*01
	IGKV9-120*01	IGKV14-100*01	IGKV9-120*01	IGKV14-100*01	IGKV9-120*01	IGKV9-120*01	IGKV9-120*01 F	IGKV14-111*01 F	IGKV14-100*01	IGKV9-120*01	IGKV9-120*01	IGKV17-121*01	IGKV14-100*01	IGKV17-121*01	IGKV17-121*01	IGKV14-100*01	IGKV4-70*01		IGKV9-124*01	IGKV17-121*01
	IGKV9-120*01	IGKV14-100*01	IGKV9-120*01	IGKV14-100*01	IGKV9-120*01	IGKV8-30*01	IGKV9-120*01 F	IGKV14-111*01 F	IGKV14-100*01	IGKV9-120*01	IGKV9-120*01	IGKV17-121*01	IGKV14-100*01	IGKV17-121*01	IGKV17-121*01	IGKV14-100*01	IGKV4-70*01		IGKV9-124*01	IGKV17-121*01
	IGKV9-120*01	IGKV14-100*01	IGKV9-120*01	IGKV14-100*01	IGKV9-120*01	IGKV9-120*01	IGKV9-120*01 F	IGKV14-111*01 F	IGKV1-135*01	IGKV9-120*01	IGKV9-120*01	IGKV17-121*01	IGKV14-100*01	IGKV17-121*01	IGKV17-121*01	IGKV14-100*01	IGKV4-70*01		IGKV9-124*01	IGKV17-121*01
	IGKV9-120*01	IGKV14-100*01	IGKV9-120*01	IGKV14-100*01	IGKV9-120*01	IGKV8-30*01	IGKV9-120*01 F	IGKV9-120*01 F	IGKV14-100*01	IGKV9-120*01	IGKV14-100*01	IGKV17-121*01	IGKV14-100*01	IGKV17-121*01	IGKV17-121*01	IGKV14-100*01	IGKV4-70*01		IGKV9-124*01	IGKV17-121*01
	IGKV9-120*01	IGKV14-100*01	IGKV9-120*01	IGKV14-100*01	IGKV9-120*01	IGKV9-120*01	IGKV9-120*01 F	IGKV9-120*01 F	IGKV14-100*01	IGKV9-120*01	IGKV14-100*01	IGKV17-121*01	IGKV14-100*01	IGKV17-121*01	IGKV17-121*01	IGKV14-100*01	IGKV4-70*01		IGKV9-124*01	IGKV17-121*01
	IGKV9-120*01	IGKV14-100*01	IGKV9-120*01	IGKV14-100*01	IGKV9-120*01	IGKV8-30*01	IGKV9-120*01 F	IGKV9-120*01 F	IGKV14-100*01	IGKV9-120*01	IGKV9-120*01	IGKV17-121*01	IGKV14-100*01	IGKV17-121*01	IGKV17-121*01	IGKV14-100*01	IGKV4-70*01		IGKV9-124*01	IGKV17-121*01
	IGKV9-120*01	IGKV14-100*01	IGKV9-120*01	IGKV14-100*01	IGKV9-120*01	IGKV9-120*01	IGKV9-120*01 F	IGKV9-120*01 F	IGKV14-100*01	IGKV9-120*01	IGKV9-120*01	IGKV17-121*01	IGKV14-100*01	IGKV17-121*01	IGKV4-91*01	IGKV14-100*01	IGKV4-70*01		IGKV9-124*01	IGKV17-121*01
	IGKV9-120*01	IGKV14-100*01	IGKV9-120*01	IGKV14-100*01	IGKV9-120*01	IGKV8-30*01	IGKV9-120*01 F	IGKV9-120*01 F	IGKV14-100*01	IGKV9-120*01	IGKV14-100*01	IGKV17-121*01	IGKV14-100*01	IGKV17-121*01	IGKV4-91*01	IGKV14-100*01	IGKV4-70*01		IGKV9-124*01	IGKV17-121*01
	IGKV9-120*01	IGKV14-100*01	IGKV9-120*01	IGKV14-100*01	IGKV9-120*01	IGKV9-120*01	IGKV9-120*01 F	IGKV14-111*01 F	IGKV14-100*01	IGKV9-120*01	IGKV14-100*01	IGKV17-121*01	IGKV9-120*01	IGKV17-121*01	IGKV17-121*01	IGKV14-100*01	IGKV4-70*01		IGKV9-124*01	IGKV17-121*01
	IGKV9-120*01	IGKV14-100*01	IGKV9-120*01	IGKV14-100*01	IGKV9-120*01	IGKV9-120*01	IGKV9-120*01 F	IGKV14-111*01 F	IGKV14-100*01	IGKV9-120*01	IGKV14-100*01	IGKV17-121*01	IGKV9-120*01	IGKV17-121*01	IGKV17-121*01	IGKV14-100*01	IGKV4-70*01		IGKV9-124*01	IGKV17-121*01
	IGKV9-120*01	IGKV14-100*01	IGKV9-120*01	IGKV14-100*01	IGKV9-120*01	IGKV8-30*01	IGKV9-120*01 F	IGKV9-120*01 F	IGKV14-100*01	IGKV9-120*01	IGKV14-100*01	IGKV17-121*01	IGKV14-100*01	IGKV17-121*01	IGKV17-121*01	IGKV14-100*01	IGKV4-70*01		IGKV9-124*01	IGKV17-121*01
	IGKV9-120*01	IGKV14-100*01	IGKV9-120*01	IGKV14-100*01	IGKV9-120*01	IGKV9-120*01	IGKV9-120*01 F	IGKV9-120*01 F	IGKV1-135*01	IGKV9-120*01	IGKV14-100*01	IGKV17-121*01	IGKV14-100*01	IGKV17-121*01	IGKV17-121*01	IGKV14-100*01	IGKV4-70*01		IGKV9-124*01	IGKV17-121*01
	IGKV9-120*01	IGKV14-100*01	IGKV9-120*01	IGKV14-100*01	IGKV9-120*01	IGKV8-30*01	IGKV9-120*01 F	IGKV4-91*01 F	IGKV14-100*01	IGKV9-120*01	IGKV14-100*01	IGKV17-121*01	IGKV14-100*01	IGKV17-121*01	IGKV17-121*01	IGKV14-100*01	IGKV4-70*01		IGKV9-124*01	IGKV17-121*01
	IGKV9-120*01	IGKV14-100*01	IGKV9-120*01	IGKV14-100*01	IGKV9-120*01	IGKV8-30*01	IGKV9-120*01 F	IGKV1-135*01 F	IGKV14-100*01	IGKV9-120*01	IGKV9-120*01	IGKV17-121*01	IGKV9-120*01	IGKV17-121*01	IGKV17-121*01	IGKV14-100*01	IGKV4-70*01		IGKV9-124*01	IGKV17-121*01
	IGKV9-120*01	IGKV14-100*01	IGKV9-120*01	IGKV14-100*01	IGKV9-120*01	IGKV9-120*01	IGKV9-120*01 F	IGKV9-120*01 F	IGKV14-100*01	IGKV9-120*01	IGKV14-100*01	IGKV17-121*01	IGKV9-120*01	IGKV17-121*01	IGKV4-91*01	IGKV14-100*01	IGKV4-70*01		IGKV9-124*01	IGKV17-121*01
	IGKV9-120*01	IGKV14-100*01	IGKV9-120*01	IGKV14-100*01	IGKV9-120*01	IGKV8-30*01	IGKV9-120*01 F	IGKV9-120*01 F	IGKV17-121*01	IGKV9-120*01	IGKV14-100*01	IGKV17-121*01	IGKV14-100*01	IGKV17-121*01	IGKV17-121*01	IGKV14-100*01	IGKV4-70*01		IGKV9-124*01	IGKV17-121*01
	IGKV9-120*01	IGKV14-100*01	IGKV9-120*01	IGKV14-100*01	IGKV9-120*01	IGKV8-30*01	IGKV9-120*01 F	IGKV9-120*01 F	IGKV14-100*01	IGKV9-120*01	IGKV9-120*01	IGKV17-121*01	IGKV14-100*01	IGKV17-121*01	IGKV17-121*01	IGKV14-100*01	IGKV4-70*01		IGKV9-124*01	IGKV17-121*01
	IGKV9-120*01	IGKV14-100*01	IGKV9-120*01	IGKV14-100*01	IGKV9-120*01	IGKV8-30*01	IGKV9-120*01 F	IGKV9-120*01 F	IGKV14-100*01	IGKV9-120*01	IGKV14-100*01	IGKV17-121*01	IGKV14-100*01	IGKV17-121*01	IGKV17-121*01	IGKV14-100*01	IGKV4-70*01		IGKV9-124*01	IGKV17-121*01
	IGKV9-120*01	IGKV14-100*01	IGKV9-120*01	IGKV14-100*01	IGKV9-120*01	IGKV9-120*01	IGKV9-120*01 F	IGKV9-120*01 F	IGKV14-100*01	IGKV9-120*01	IGKV14-100*01	IGKV17-121*01	IGKV14-100*01	IGKV17-121*01	IGKV17-121*01	IGKV14-100*01	IGKV4-70*01		IGKV9-124*01	IGKV17-121*01
	IGKV9-120*01	IGKV14-100*01	IGKV9-120*01	IGKV14-100*01	IGKV9-120*01	IGKV8-30*01	IGKV9-120*01 F	IGKV14-111*01 F	IGKV14-100*01	IGKV9-120*01	IGKV14-100*01	IGKV17-121*01	IGKV14-100*01	IGKV17-121*01	IGKV17-121*01	IGKV14-100*01	IGKV4-70*01		IGKV9-124*01	IGKV17-121*01
	IGKV9-120*01	IGKV14-100*01	IGKV9-120*01	IGKV14-100*01	IGKV9-120*01	IGKV9-120*01	IGKV9-120*01 F	IGKV14-111*01 F	IGKV14-100*01	IGKV9-120*01	IGKV14-100*01	IGKV17-121*01	IGKV14-100*01	IGKV17-121*01	IGKV4-91*01	IGKV14-100*01	IGKV4-70*01		IGKV9-124*01	IGKV17-121*01
	IGKV9-120*01	IGKV14-100*01	IGKV9-120*01	IGKV14-100*01	IGKV1-135*01	IGKV8-30*01	IGKV9-120*01 F	IGKV9-120*01 F	IGKV14-100*01	IGKV9-120*01	IGKV9-120*01	IGKV17-121*01	IGKV14-100*01	IGKV17-121*01	IGKV17-121*01	IGKV14-100*01	IGKV4-70*01		IGKV9-124*01	IGKV17-121*01
	IGKV9-120*01	IGKV14-100*01	IGKV9-120*01	IGKV14-100*01	IGKV9-120*01	IGKV8-30*01	IGKV9-120*01 F	IGKV17-121*01 F	IGKV14-100*01	IGKV9-120*01	IGKV14-100*01	IGKV17-121*01	IGKV9-120*01	IGKV17-121*01	IGKV17-121*01	IGKV14-100*01	IGKV4-70*01		IGKV9-124*01	IGKV17-121*01
	IGKV9-120*01	IGKV14-100*01	IGKV9-120*01	IGKV14-100*01	IGKV9-120*01	IGKV8-30*01	IGKV9-120*01 F	IGKV9-120*01 F	IGKV14-100*01	IGKV9-120*01	IGKV9-120*01	IGKV17-121*01	IGKV14-100*01	IGKV17-121*01	IGKV17-121*01	IGKV14-100*01	IGKV4-70*01		IGKV9-124*01	IGKV17-121*01
	IGKV9-120*01	IGKV14-100*01	IGKV9-120*01	IGKV14-100*01	IGKV9-120*01	IGKV8-30*01	IGKV9-120*01 F	IGKV9-120*01 F	IGKV14-100*01	IGKV9-120*01	IGKV9-120*01	IGKV17-121*01	IGKV14-100*01	IGKV17-121*01	IGKV17-121*01	IGKV14-100*01	IGKV4-70*01		IGKV9-124*01	IGKV17-121*01
	IGKV9-120*01	IGKV14-100*01	IGKV9-120*01	IGKV14-100*01	IGKV9-120*01	IGKV8-30*01	IGKV9-120*01 F	IGKV9-120*01 F	IGKV14-100*01	IGKV9-120*01	IGKV14-100*01	IGKV17-121*01	IGKV14-100*01	IGKV17-121*01	IGKV4-91*01	IGKV14-100*01	IGKV4-70*01		IGKV9-124*01	IGKV17-121*01
	IGKV9-120*01	IGKV14-100*01	IGKV9-120*01	IGKV14-100*01	IGKV9-120*01	IGKV8-30*01	IGKV9-120*01 F	IGKV9-120*01 F	IGKV14-100*01	IGKV9-120*01	IGKV9-120*01	IGKV17-121*01	IGKV14-100*01	IGKV17-121*01	IGKV17-121*01	IGKV14-100*01	IGKV4-70*01		IGKV9-124*01	IGKV17-121*01
	IGKV9-120*01	IGKV14-100*01	IGKV9-120*01	IGKV14-100*01	IGKV9-120*01	IGKV8-30*01	IGKV9-120*01 F	IGKV9-120*01 F	IGKV14-100*01	IGKV9-120*01	IGKV14-100*01	IGKV17-121*01	IGKV14-100*01	IGKV17-121*01	IGKV17-121*01	IGKV14-100*01	IGKV4-70*01		IGKV9-124*01	IGKV17-121*01
	IGKV9-120*01	IGKV14-100*01	IGKV9-120*01	IGKV14-100*01	IGKV9-120*01	IGKV8-30*01	IGKV9-120*01 F	IGKV9-120*01 F	IGKV14-100*01	IGKV9-120*01	IGKV14-100*01	IGKV17-121*01	IGKV14-100*01	IGKV17-121*01	IGKV17-121*01	IGKV14-100*01	IGKV4-70*01		IGKV9-124*01	IGKV17-121*01
	IGKV9-120*01	IGKV14-100*01	IGKV9-120*01	IGKV14-100*01	IGKV9-120*01	IGKV9-120*01	IGKV9-120*01 F	IGKV9-120*01 F	IGKV17-121*01	IGKV9-120*01	IGKV14-100*01	IGKV17-121*01	IGKV14-100*01	IGKV17-121*01	IGKV17-121*01	IGKV14-100*01	IGKV4-70*01		IGKV9-124*01	IGKV17-121*01
	IGKV9-120*01	IGKV14-100*01	IGKV9-120*01	IGKV14-100*01	IGKV9-120*01	IGKV9-120*01	IGKV9-120*01 F	IGKV9-120*01 F	IGKV14-100*01	IGKV9-120*01	IGKV14-100*01	IGKV17-121*01	IGKV14-100*01	IGKV17-121*01	IGKV4-91*01	IGKV14-100*01	IGKV4-70*01		IGKV9-124*01	IGKV17-121*01
	IGKV9-120*01	IGKV14-100*01	IGKV9-120*01	IGKV14-100*01	IGKV9-120*01	IGKV9-120*01	IGKV9-120*01 F	IGKV9-120*01 F	IGKV14-100*01	IGKV9-120*01	IGKV14-100*01	IGKV17-121*01	IGKV14-100*01	IGKV17-121*01	IGKV17-121*01	IGKV14-100*01	IGKV4-70*01		IGKV9-124*01	IGKV17-121*01
	IGKV9-120*01	IGKV14-100*01	IGKV9-120*01	IGKV14-100*01	IGKV9-120*01	IGKV8-30*01	IGKV9-120*01 F	IGKV9-120*01 F	IGKV14-100*01	IGKV9-120*01	IGKV9-120*01	IGKV17-121*01	IGKV14-100*01	IGKV17-121*01	IGKV4-91*01	IGKV14-100*01	IGKV4-70*01		IGKV9-124*01	IGKV17-121*01
	IGKV9-120*01	IGKV14-100*01	IGKV9-120*01	IGKV14-100*01	IGKV9-120*01	IGKV9-120*01	IGKV9-120*01 F	IGKV9-120*01 F	IGKV14-100*01	IGKV9-120*01	IGKV14-100*01	IGKV17-121*01	IGKV14-100*01	IGKV17-121*01	IGKV4-91*01	IGKV14-100*01	IGKV4-70*01		IGKV9-124*01	IGKV17-121*01
	IGKV9-120*01	IGKV14-100*01	IGKV9-120*01	IGKV14-100*01	IGKV9-120*01	IGKV9-120*01	IGKV9-120*01 F	IGKV9-120*01 F	IGKV14-100*01	IGKV9-120*01	IGKV9-120*01	IGKV17-121*01	IGKV14-100*01	IGKV17-121*01	IGKV17-121*01	IGKV14-100*01	IGKV4-70*01		IGKV9-124*01	IGKV17-121*01
	IGKV9-120*01	IGKV14-100*01	IGKV9-120*01	IGKV14-100*01	IGKV9-120*01	IGKV8-30*01	IGKV9-120*01 F	IGKV9-120*01 F	IGKV14-100*01	IGKV9-120*01	IGKV14-100*01	IGKV17-121*01	IGKV14-100*01	IGKV17-121*01	IGKV4-91*01	IGKV14-100*01	IGKV4-70*01		IGKV9-124*01	IGKV17-121*01
	IGKV9-120*01	IGKV14-100*01	IGKV9-120*01	IGKV14-100*01	IGKV9-120*01	IGKV8-30*01	IGKV9-120*01 F	IGKV9-120*01 F	IGKV14-100*01	IGKV9-120*01	IGKV14-100*01	IGKV17-121*01	IGKV14-100*01	IGKV17-121*01	IGKV17-121*01	IGKV14-100*01	IGKV4-70*01		IGKV9-124*01	IGKV17-121*01
	IGKV9-120*01	IGKV14-100*01	IGKV9-120*01	IGKV14-100*01	IGKV9-120*01	IGKV9-120*01	IGKV9-120*01 F	IGKV14-111*01 F	IGKV14-100*01	IGKV9-120*01	IGKV9-120*01	IGKV17-121*01	IGKV14-100*01	IGKV17-121*01	IGKV17-121*01	IGKV14-100*01	IGKV4-70*01		IGKV9-124*01	IGKV17-121*01
	IGKV9-120*01	IGKV14-100*01	IGKV9-120*01	IGKV14-100*01	IGKV9-120*01	IGKV8-30*01	IGKV9-120*01 F	IGKV14-111*01 F	IGKV14-100*01	IGKV9-120*01	IGKV9-120*01	IGKV17-121*01	IGKV14-100*01	IGKV17-121*01	IGKV17-121*01	IGKV14-100*01	IGKV4-70*01		IGKV9-124*01	IGKV17-121*01
	IGKV9-120*01	IGKV14-100*01	IGKV9-120*01	IGKV14-100*01	IGKV9-120*01	IGKV8-30*01	IGKV9-120*01 F	IGKV9-120*01 F	IGKV14-100*01	IGKV9-120*01	IGKV14-100*01	IGKV17-121*01	IGKV14-100*01	IGKV17-121*01	IGKV17-121*01	IGKV14-100*01	IGKV4-70*01		IGKV9-124*01	IGKV17-121*01
	IGKV9-120*01	IGKV14-100*01	IGKV9-120*01	IGKV14-100*01	IGKV9-120*01	IGKV9-120*01	IGKV9-120*01 F	IGKV9-120*01 F	IGKV14-100*01	IGKV9-120*01	IGKV9-120*01	IGKV17-121*01	IGKV14-100*01	IGKV17-121*01	IGKV17-121*01	IGKV14-100*01	IGKV4-70*01		IGKV9-124*01	IGKV17-121*01
	IGKV9-120*01	IGKV14-100*01	IGKV9-120*01	IGKV14-100*01	IGKV9-120*01	IGKV8-30*01	IGKV9-120*01 F	IGKV9-120*01 F	IGKV14-100*01	IGKV9-120*01	IGKV9-120*01	IGKV17-121*01	IGKV14-100*01	IGKV17-121*01	IGKV17-121*01	IGKV14-100*01	IGKV4-70*01		IGKV9-124*01	IGKV17-121*01
	IGKV9-120*01	IGKV14-100*01	IGKV9-120*01	IGKV14-100*01	IGKV9-120*01	IGKV9-120*01	IGKV9-120*01 F	IGKV9-120*01 F	IGKV14-100*01	IGKV9-120*01	IGKV9-120*01	IGKV17-121*01	IGKV14-100*01	IGKV17-121*01	IGKV17-121*01	IGKV14-100*01	IGKV4-70*01		IGKV9-124*01	IGKV17-121*01
	IGKV9-120*01	IGKV14-100*01	IGKV9-120*01	IGKV14-100*01	IGKV9-120*01	IGKV9-120*01	IGKV9-120*01 F	IGKV9-120*01 F	IGKV14-100*01	IGKV9-120*01	IGKV14-100*01	IGKV17-121*01	IGKV14-100*01	IGKV17-121*01	IGKV17-121*01	IGKV14-100*01	IGKV4-70*01		IGKV9-124*01	IGKV17-121*01
	IGKV9-120*01	IGKV14-100*01	IGKV9-120*01	IGKV14-100*01	IGKV9-120*01	IGKV9-120*01	IGKV9-120*01 F	IGKV9-120*01 F	IGKV14-100*01	IGKV9-120*01	IGKV14-100*01	IGKV17-121*01	IGKV14-100*01	IGKV17-121*01	IGKV4-91*01	IGKV14-100*01	IGKV4-70*01		IGKV9-124*01	IGKV17-121*01
	IGKV9-120*01	IGKV14-100*01	IGKV9-120*01	IGKV14-100*01	IGKV9-120*01	IGKV9-120*01	IGKV9-120*01 F	IGKV14-111*01 F	IGKV14-100*01	IGKV9-120*01	IGKV14-100*01	IGKV17-121*01	IGKV14-100*01	IGKV17-121*01	IGKV4-91*01	IGKV14-100*01	IGKV4-70*01		IGKV9-124*01	IGKV17-121*01
	IGKV9-120*01	IGKV14-100*01	IGKV9-120*01	IGKV14-100*01	IGKV9-120*01	IGKV9-120*01	IGKV9-120*01 F	IGKV14-111*01 F	IGKV14-100*01	IGKV9-120*01	IGKV9-120*01	IGKV17-121*01	IGKV14-100*01	IGKV17-121*01	IGKV17-121*01	IGKV14-100*01	IGKV4-70*01		IGKV9-124*01	IGKV17-121*01
	IGKV9-120*01	IGKV14-100*01	IGKV9-120*01	IGKV14-100*01	IGKV9-120*01	IGKV8-30*01	IGKV9-120*01 F	IGKV14-111*01 F	IGKV14-100*01	IGKV9-120*01	IGKV14-100*01	IGKV17-121*01	IGKV14-100*01	IGKV17-121*01	IGKV17-121*01	IGKV14-100*01	IGKV4-70*01		IGKV9-124*01	IGKV17-121*01
	IGKV9-120*01	IGKV14-100*01	IGKV9-120*01	IGKV14-100*01	IGKV9-120*01	IGKV9-120*01	IGKV9-120*01 F	IGKV9-120*01 F	IGKV14-100*01	IGKV9-120*01	IGKV14-100*01	IGKV17-121*01	IGKV14-100*01	IGKV17-121*01	IGKV4-91*01	IGKV14-100*01	IGKV4-70*01		IGKV9-124*01	IGKV17-121*01
	IGKV9-120*01	IGKV14-100*01	IGKV9-120*01	IGKV14-100*01	IGKV9-120*01	IGKV8-30*01	IGKV9-120*01 F	IGKV9-120*01 F	IGKV14-100*01	IGKV9-120*01	IGKV14-100*01	IGKV17-121*01	IGKV14-100*01	IGKV17-121*01	IGKV17-121*01	IGKV14-100*01	IGKV4-70*01		IGKV9-124*01	IGKV17-121*01
	IGKV9-120*01	IGKV14-100*01	IGKV9-120*01	IGKV14-100*01	IGKV9-120*01	IGKV8-30*01	IGKV9-120*01 F	IGKV9-120*01 F	IGKV14-100*01	IGKV9-120*01	IGKV14-100*01	IGKV9-120*01	IGKV14-100*01	IGKV17-121*01	IGKV17-121*01	IGKV14-100*01	IGKV4-70*01		IGKV9-124*01	IGKV17-121*01
	IGKV9-120*01	IGKV14-100*01	IGKV9-120*01	IGKV14-100*01	IGKV9-120*01	IGKV8-30*01	IGKV9-120*01 F	IGKV9-120*01 F	IGKV14-100*01	IGKV9-120*01	IGKV9-120*01	IGKV17-121*01	IGKV14-100*01	IGKV17-121*01	IGKV4-91*01	IGKV14-100*01	IGKV4-70*01		IGKV9-124*01	IGKV17-121*01
	IGKV9-120*01	IGKV14-100*01	IGKV9-120*01	IGKV14-100*01	IGKV9-120*01	IGKV8-30*01	IGKV9-120*01 F	IGKV9-120*01 F	IGKV14-100*01	IGKV9-120*01	IGKV9-120*01	IGKV17-121*01	IGKV9-120*01	IGKV17-121*01	IGKV17-121*01	IGKV14-100*01	IGKV4-70*01		IGKV9-124*01	IGKV17-121*01
	IGKV9-120*01	IGKV14-100*01	IGKV9-120*01	IGKV14-100*01	IGKV9-120*01	IGKV8-30*01	IGKV9-120*01 F	IGKV9-120*01 F	IGKV14-100*01	IGKV9-120*01	IGKV14-100*01	IGKV17-121*01	IGKV14-100*01	IGKV17-121*01	IGKV4-91*01	IGKV14-100*01	IGKV4-70*01		IGKV9-124*01	IGKV17-121*01
	IGKV9-120*01	IGKV14-100*01	IGKV9-120*01	IGKV14-100*01	IGKV9-120*01	IGKV8-30*01	IGKV9-120*01 F	IGKV9-120*01 F	IGKV14-100*01	IGKV9-120*01	IGKV14-100*01	IGKV17-121*01	IGKV9-120*01	IGKV17-121*01	IGKV17-121*01	IGKV14-100*01	IGKV4-70*01		IGKV9-124*01	IGKV17-121*01
	IGKV9-120*01	IGKV14-100*01	IGKV9-120*01	IGKV14-100*01	IGKV9-120*01	IGKV8-30*01	IGKV9-120*01 F	IGKV9-120*01 F	IGKV14-100*01	IGKV9-120*01	IGKV14-100*01	IGKV17-121*01	IGKV14-100*01	IGKV17-121*01	IGKV17-121*01	IGKV14-100*01	IGKV4-70*01		IGKV9-124*01	IGKV17-121*01
	IGKV9-120*01	IGKV14-100*01	IGKV9-120*01	IGKV14-100*01	IGKV9-120*01	IGKV8-30*01	IGKV9-120*01 F	IGKV9-120*01 F	IGKV14-100*01	IGKV9-120*01	IGKV14-100*01	IGKV17-121*01	IGKV14-100*01	IGKV17-121*01	IGKV17-121*01	IGKV14-100*01	IGKV4-70*01		IGKV9-124*01	IGKV17-121*01
	IGKV9-120*01	IGKV14-100*01	IGKV9-120*01	IGKV14-100*01	IGKV9-120*01	IGKV9-120*01	IGKV9-120*01 F	IGKV9-120*01 F	IGKV14-100*01	IGKV9-120*01	IGKV9-120*01	IGKV17-121*01	IGKV14-100*01	IGKV17-121*01	IGKV17-121*01	IGKV14-100*01	IGKV4-70*01		IGKV9-124*01	IGKV17-121*01
	IGKV9-120*01	IGKV14-100*01	IGKV9-120*01	IGKV14-100*01	IGKV9-120*01	IGKV9-120*01	IGKV9-120*01 F	IGKV14-111*01 F	IGKV14-100*01	IGKV9-120*01	IGKV9-120*01	IGKV17-121*01	IGKV14-100*01	IGKV17-121*01	IGKV17-121*01	IGKV14-100*01	IGKV4-70*01		IGKV9-124*01	IGKV17-121*01
	IGKV9-120*01	IGKV14-100*01	IGKV9-120*01	IGKV14-100*01	IGKV9-120*01	IGKV8-30*01	IGKV9-120*01 F	IGKV9-120*01 F	IGKV14-100*01	IGKV9-120*01	IGKV14-100*01	IGKV17-121*01	IGKV9-120*01	IGKV17-121*01	IGKV4-91*01	IGKV14-100*01	IGKV4-70*01		IGKV9-124*01	IGKV17-121*01
	IGKV9-120*01	IGKV14-100*01	IGKV9-120*01	IGKV14-100*01	IGKV9-120*01	IGKV8-30*01	IGKV9-120*01 F	IGKV9-120*01 F	IGKV14-100*01	IGKV9-120*01	IGKV14-100*01	IGKV17-121*01	IGKV14-100*01	IGKV17-121*01	IGKV17-121*01	IGKV14-100*01	IGKV4-70*01		IGKV9-124*01	IGKV17-121*01
	IGKV9-120*01	IGKV14-100*01	IGKV9-120*01	IGKV14-100*01	IGKV9-120*01	IGKV8-30*01	IGKV9-120*01 F	IGKV9-120*01 F	IGKV14-100*01	IGKV9-120*01	IGKV9-120*01	IGKV17-121*01	IGKV14-100*01	IGKV17-121*01	IGKV17-121*01	IGKV14-100*01	IGKV4-70*01		IGKV9-124*01	IGKV17-121*01
	IGKV9-120*01	IGKV14-100*01	IGKV9-120*01	IGKV14-100*01	IGKV9-120*01	IGKV8-30*01	IGKV9-120*01 F	IGKV9-120*01 F	IGKV14-100*01	IGKV9-120*01	IGKV9-120*01	IGKV17-121*01	IGKV14-100*01	IGKV17-121*01	IGKV17-121*01	IGKV14-100*01	IGKV4-70*01		IGKV9-124*01	IGKV17-121*01
	IGKV9-120*01	IGKV14-100*01	IGKV9-120*01	IGKV14-100*01	IGKV9-120*01	IGKV9-120*01	IGKV9-120*01 F	IGKV9-120*01 F	IGKV14-100*01	IGKV9-120*01	IGKV9-120*01	IGKV17-121*01	IGKV14-100*01	IGKV17-121*01	IGKV17-121*01	IGKV14-100*01	IGKV4-70*01		IGKV9-124*01	IGKV17-121*01
	IGKV9-120*01	IGKV14-100*01	IGKV9-120*01	IGKV14-100*01	IGKV9-120*01	IGKV9-120*01	IGKV9-120*01 F	IGKV9-120*01 F	IGKV14-100*01	IGKV9-120*01	IGKV9-120*01	IGKV17-121*01	IGKV14-100*01	IGKV17-121*01	IGKV17-121*01	IGKV14-100*01	IGKV4-70*01		IGKV9-124*01	IGKV17-121*01
	IGKV9-120*01	IGKV14-100*01	IGKV9-120*01	IGKV14-100*01	IGKV9-120*01	IGKV9-120*01	IGKV9-120*01 F	IGKV9-120*01 F	IGKV4-57*01	IGKV9-120*01	IGKV14-100*01	IGKV17-121*01	IGKV9-120*01	IGKV17-121*01	IGKV4-91*01	IGKV14-100*01	IGKV4-70*01		IGKV9-124*01	IGKV17-121*01
	IGKV9-120*01	IGKV14-100*01	IGKV9-120*01	IGKV14-100*01	IGKV9-120*01	IGKV8-30*01	IGKV9-120*01 F	IGKV9-120*01 F	IGKV14-100*01	IGKV9-120*01	IGKV14-100*01	IGKV17-121*01	IGKV14-100*01	IGKV17-121*01	IGKV4-91*01	IGKV14-100*01	IGKV4-70*01		IGKV9-124*01	IGKV17-121*01
	IGKV9-120*01	IGKV14-100*01	IGKV9-120*01	IGKV14-100*01	IGKV9-120*01	IGKV9-120*01	IGKV9-120*01 F	IGKV9-120*01 F	IGKV14-100*01	IGKV9-120*01	IGKV14-100*01	IGKV17-121*01	IGKV14-100*01	IGKV17-121*01	IGKV4-91*01	IGKV14-100*01	IGKV4-70*01		IGKV9-124*01	IGKV17-121*01
	IGKV9-120*01	IGKV14-100*01	IGKV9-120*01	IGKV14-100*01	IGKV9-120*01	IGKV9-120*01	IGKV9-120*01 F	IGKV9-120*01 F	IGKV14-100*01	IGKV9-120*01	IGKV9-120*01	IGKV17-121*01	IGKV14-100*01	IGKV17-121*01	IGKV17-121*01	IGKV14-100*01	IGKV4-70*01		IGKV9-124*01	IGKV17-121*01
	IGKV9-120*01	IGKV14-100*01	IGKV9-120*01	IGKV14-100*01	IGKV9-120*01	IGKV8-30*01	IGKV9-120*01 F	IGKV14-111*01 F	IGKV17-121*01	IGKV9-120*01	IGKV14-100*01	IGKV17-121*01	IGKV9-120*01	IGKV17-121*01	IGKV4-91*01	IGKV14-100*01	IGKV4-70*01		IGKV9-124*01	IGKV17-121*01
	IGKV9-120*01	IGKV14-100*01	IGKV9-120*01	IGKV14-100*01	IGKV9-120*01	IGKV9-120*01	IGKV9-120*01 F	IGKV9-120*01 F	IGKV4-59*01	IGKV9-120*01	IGKV14-100*01	IGKV17-121*01	IGKV9-120*01	IGKV17-121*01	IGKV17-121*01	IGKV14-100*01	IGKV4-70*01		IGKV9-124*01	IGKV17-121*01
	IGKV9-120*01	IGKV14-100*01	IGKV9-120*01	IGKV14-100*01	IGKV9-120*01	IGKV9-120*01	IGKV9-120*01 F	IGKV9-120*01 F	IGKV14-100*01	IGKV9-120*01	IGKV14-100*01	IGKV17-121*01	IGKV9-120*01	IGKV17-121*01	IGKV4-91*01	IGKV14-100*01	IGKV4-70*01		IGKV9-124*01	IGKV17-121*01
	IGKV9-120*01	IGKV14-100*01	IGKV9-120*01	IGKV14-100*01	IGKV9-120*01	IGKV8-30*01	IGKV9-120*01 F	IGKV9-120*01 F	IGKV14-100*01	IGKV9-120*01	IGKV14-100*01	IGKV17-121*01	IGKV14-100*01	IGKV17-121*01	IGKV17-121*01	IGKV14-100*01	IGKV4-70*01		IGKV9-124*01	IGKV17-121*01
	IGKV9-120*01	IGKV14-100*01	IGKV9-120*01	IGKV14-100*01	IGKV9-120*01	IGKV8-30*01	IGKV9-120*01 F	IGKV14-111*01 F	IGKV14-100*01	IGKV9-120*01	IGKV9-120*01	IGKV17-121*01	IGKV9-120*01	IGKV17-121*01	IGKV17-121*01	IGKV14-100*01	IGKV4-70*01		IGKV9-124*01	IGKV17-121*01
	IGKV9-120*01	IGKV14-100*01	IGKV9-120*01	IGKV14-100*01	IGKV9-120*01	IGKV8-30*01	IGKV9-120*01 F	IGKV14-111*01 F	IGKV14-100*01	IGKV9-120*01	IGKV9-120*01	IGKV17-121*01	IGKV14-100*01	IGKV17-121*01	IGKV4-91*01	IGKV14-100*01	IGKV4-70*01		IGKV9-124*01	IGKV17-121*01
	IGKV9-120*01	IGKV14-100*01	IGKV9-120*01	IGKV14-100*01	IGKV9-120*01	IGKV9-120*01	IGKV9-120*01 F	IGKV9-120*01 F	IGKV14-100*01	IGKV9-120*01	IGKV14-100*01	IGKV17-121*01	IGKV14-100*01	IGKV17-121*01	IGKV17-121*01	IGKV14-100*01	IGKV4-70*01		IGKV9-124*01	IGKV17-121*01
	IGKV9-120*01	IGKV14-100*01	IGKV9-120*01	IGKV14-100*01	IGKV9-120*01	IGKV8-30*01	IGKV9-120*01 F	IGKV14-111*01 F	IGKV14-100*01	IGKV9-120*01	IGKV14-100*01	IGKV17-121*01	IGKV9-120*01	IGKV17-121*01	IGKV4-91*01	IGKV14-100*01	IGKV4-70*01		IGKV9-124*01	IGKV17-121*01
	IGKV9-120*01	IGKV14-100*01	IGKV9-120*01	IGKV14-100*01	IGKV9-120*01	IGKV9-120*01	IGKV9-120*01 F	IGKV9-120*01 F	IGKV17-121*01	IGKV9-120*01	IGKV9-120*01	IGKV17-121*01	IGKV14-100*01	IGKV17-121*01	IGKV17-121*01	IGKV14-100*01	IGKV4-70*01		IGKV9-124*01	IGKV17-121*01
	IGKV9-120*01	IGKV14-100*01	IGKV9-120*01	IGKV14-100*01	IGKV9-120*01	IGKV9-120*01	IGKV9-120*01 F	IGKV14-111*01 F	IGKV17-121*01	IGKV9-120*01	IGKV9-120*01	IGKV17-121*01	IGKV14-100*01	IGKV17-121*01	IGKV17-121*01	IGKV14-100*01	IGKV4-70*01		IGKV9-124*01	IGKV17-121*01
	IGKV9-120*01	IGKV14-100*01	IGKV9-120*01	IGKV14-100*01	IGKV9-120*01	IGKV9-120*01	IGKV9-120*01 F	IGKV9-120*01 F	IGKV14-100*01	IGKV9-120*01	IGKV9-120*01	IGKV17-121*01	IGKV9-120*01	IGKV17-121*01	IGKV4-91*01	IGKV14-100*01	IGKV4-70*01		IGKV9-124*01	IGKV17-121*01
	IGKV9-120*01	IGKV14-100*01	IGKV9-120*01	IGKV14-100*01	IGKV9-120*01	IGKV8-30*01	IGKV9-120*01 F	IGKV9-120*01 F	IGKV14-100*01	IGKV14-100*01	IGKV14-100*01	IGKV17-121*01	IGKV14-100*01	IGKV17-121*01	IGKV17-121*01	IGKV14-100*01	IGKV4-70*01		IGKV9-124*01	IGKV17-121*01
	IGKV9-120*01	IGKV14-100*01	IGKV9-120*01	IGKV14-100*01	IGKV9-120*01	IGKV8-30*01	IGKV9-120*01 F	IGKV9-120*01 F	IGKV14-100*01	IGKV9-120*01	IGKV9-120*01	IGKV17-121*01	IGKV14-100*01	IGKV17-121*01	IGKV17-121*01	IGKV14-100*01	IGKV4-70*01		IGKV9-124*01	IGKV17-121*01
	IGKV9-120*01	IGKV14-100*01	IGKV9-120*01	IGKV14-100*01	IGKV9-120*01	IGKV8-30*01	IGKV9-120*01 F	IGKV9-120*01 F	IGKV17-121*01	IGKV9-120*01	IGKV14-100*01	IGKV17-121*01	IGKV14-100*01	IGKV17-121*01	IGKV17-121*01	IGKV14-100*01	IGKV4-70*01		IGKV9-124*01	IGKV17-121*01
	IGKV9-120*01	IGKV14-100*01	IGKV9-120*01	IGKV14-100*01	IGKV9-120*01	IGKV9-120*01	IGKV9-120*01 F	IGKV9-120*01 F	IGKV1-135*01	IGKV9-120*01	IGKV9-120*01	IGKV17-121*01	IGKV14-100*01	IGKV17-121*01	IGKV17-121*01	IGKV14-100*01	IGKV4-70*01		IGKV9-124*01	IGKV17-121*01
	IGKV9-120*01	IGKV14-100*01	IGKV9-120*01	IGKV14-100*01	IGKV9-120*01	IGKV8-30*01	IGKV9-120*01 F	IGKV9-120*01 F	IGKV14-100*01	IGKV9-120*01	IGKV9-120*01	IGKV17-121*01	IGKV14-100*01	IGKV17-121*01	IGKV4-91*01	IGKV14-100*01	IGKV4-70*01		IGKV9-124*01	IGKV17-121*01
	IGKV9-120*01	IGKV14-100*01	IGKV9-120*01	IGKV14-100*01	IGKV9-120*01	IGKV8-30*01	IGKV9-120*01 F	IGKV9-120*01 F	IGKV14-100*01	IGKV9-120*01	IGKV14-100*01	IGKV17-121*01	IGKV9-120*01	IGKV17-121*01	IGKV17-121*01	IGKV14-100*01	IGKV4-70*01		IGKV9-124*01	IGKV17-121*01
	IGKV9-120*01	IGKV14-100*01	IGKV9-120*01	IGKV14-100*01	IGKV9-120*01	IGKV9-120*01	IGKV9-120*01 F	IGKV9-120*01 F	IGKV14-100*01	IGKV9-120*01	IGKV14-100*01	IGKV17-121*01	IGKV14-100*01	IGKV17-121*01	IGKV17-121*01	IGKV14-100*01	IGKV4-70*01		IGKV9-124*01	IGKV17-121*01
	IGKV9-120*01	IGKV14-100*01	IGKV9-120*01	IGKV14-100*01	IGKV9-120*01	IGKV8-30*01	IGKV9-120*01 F	IGKV9-120*01 F	IGKV14-100*01	IGKV9-120*01	IGKV14-100*01	IGKV17-121*01	IGKV14-100*01	IGKV17-121*01	IGKV17-121*01	IGKV14-100*01	IGKV4-70*01		IGKV9-124*01	IGKV17-121*01
	IGKV9-120*01	IGKV14-100*01	IGKV9-120*01	IGKV14-100*01	IGKV9-120*01	IGKV8-30*01	IGKV9-120*01 F	IGKV9-120*01 F	IGKV14-100*01	IGKV9-120*01	IGKV14-100*01	IGKV17-121*01	IGKV14-100*01	IGKV17-121*01	IGKV4-91*01	IGKV14-100*01	IGKV4-70*01		IGKV9-124*01	IGKV17-121*01
	IGKV9-120*01	IGKV14-100*01	IGKV9-120*01	IGKV14-100*01	IGKV9-120*01	IGKV9-120*01	IGKV9-120*01 F	IGKV9-120*01 F	IGKV14-100*01	IGKV9-120*01	IGKV14-100*01	IGKV17-121*01	IGKV9-120*01	IGKV17-121*01	IGKV17-121*01	IGKV14-100*01	IGKV4-70*01		IGKV9-124*01	IGKV17-121*01
	IGKV9-120*01	IGKV14-100*01	IGKV9-120*01	IGKV14-100*01	IGKV9-120*01	IGKV8-30*01	IGKV9-120*01 F	IGKV9-120*01 F	IGKV14-100*01	IGKV9-120*01	IGKV14-100*01	IGKV17-121*01	IGKV14-100*01	IGKV17-121*01	IGKV17-121*01	IGKV14-100*01	IGKV4-70*01		IGKV9-124*01	IGKV17-121*01
	IGKV9-120*01	IGKV14-100*01	IGKV9-120*01	IGKV14-100*01	IGKV9-120*01	IGKV9-120*01	IGKV9-120*01 F	IGKV9-120*01 F	IGKV14-100*01	IGKV9-120*01	IGKV14-100*01	IGKV17-121*01	IGKV14-100*01	IGKV17-121*01	IGKV4-91*01	IGKV14-100*01	IGKV4-70*01		IGKV9-124*01	IGKV17-121*01
	IGKV9-120*01	IGKV14-100*01	IGKV9-120*01	IGKV14-100*01	IGKV9-120*01	IGKV9-120*01	IGKV9-120*01 F	IGKV9-120*01 F	IGKV14-100*01	IGKV9-120*01	IGKV9-120*01	IGKV17-121*01	IGKV14-100*01	IGKV17-121*01	IGKV17-121*01	IGKV14-100*01	IGKV4-70*01		IGKV9-124*01	IGKV17-121*01
	IGKV9-120*01	IGKV14-100*01	IGKV9-120*01	IGKV14-100*01	IGKV9-120*01	IGKV8-30*01	IGKV9-120*01 F	IGKV9-120*01 F	IGKV14-100*01	IGKV9-120*01	IGKV14-100*01	IGKV17-121*01	IGKV14-100*01	IGKV17-121*01	IGKV17-121*01	IGKV14-100*01	IGKV4-70*01		IGKV9-124*01	IGKV17-121*01
	IGKV9-120*01	IGKV14-100*01	IGKV9-120*01	IGKV14-100*01	IGKV9-120*01	IGKV8-30*01	IGKV9-120*01 F	IGKV9-120*01 F	IGKV14-100*01	IGKV9-120*01	IGKV14-100*01	IGKV17-121*01	IGKV14-100*01	IGKV17-121*01	IGKV4-91*01	IGKV14-100*01	IGKV4-70*01		IGKV9-124*01	IGKV17-121*01
	IGKV9-120*01	IGKV14-100*01	IGKV9-120*01	IGKV14-100*01	IGKV9-120*01	IGKV8-30*01	IGKV9-120*01 F	IGKV9-120*01 F	IGKV14-100*01	IGKV9-120*01	IGKV9-120*01	IGKV17-121*01	IGKV14-100*01	IGKV17-121*01	IGKV4-91*01	IGKV14-100*01	IGKV4-70*01		IGKV9-124*01	IGKV17-121*01
	IGKV9-120*01	IGKV14-100*01	IGKV9-120*01	IGKV14-100*01	IGKV9-120*01	IGKV9-120*01	IGKV9-120*01 F	IGKV9-120*01 F	IGKV14-100*01	IGKV9-120*01	IGKV14-100*01	IGKV17-121*01	IGKV14-100*01	IGKV17-121*01	IGKV17-121*01	IGKV14-100*01	IGKV4-70*01		IGKV9-124*01	IGKV17-121*01
	IGKV9-120*01	IGKV14-100*01	IGKV9-120*01	IGKV14-100*01	IGKV9-120*01	IGKV8-30*01	IGKV9-120*01 F	IGKV9-120*01 F	IGKV14-100*01	IGKV9-120*01	IGKV9-120*01	IGKV17-121*01	IGKV14-100*01	IGKV17-121*01	IGKV4-91*01	IGKV14-100*01	IGKV4-70*01		IGKV9-124*01	IGKV17-121*01
	IGKV9-120*01	IGKV14-100*01	IGKV9-120*01	IGKV14-100*01	IGKV9-120*01	IGKV8-30*01	IGKV9-120*01 F	IGKV9-120*01 F	IGKV14-100*01	IGKV9-120*01	IGKV14-100*01	IGKV17-121*01	IGKV14-100*01	IGKV17-121*01	IGKV17-121*01	IGKV14-100*01	IGKV4-70*01		IGKV9-124*01	IGKV17-121*01
	IGKV9-120*01	IGKV14-100*01	IGKV9-120*01	IGKV14-100*01	IGKV9-120*01	IGKV8-30*01	IGKV9-120*01 F	IGKV9-120*01 F	IGKV14-100*01	IGKV9-120*01	IGKV14-100*01	IGKV17-121*01	IGKV14-100*01	IGKV17-121*01	IGKV17-121*01	IGKV14-100*01	IGKV4-70*01		IGKV9-124*01	IGKV17-121*01
	IGKV9-120*01	IGKV14-100*01	IGKV9-120*01	IGKV14-100*01	IGKV9-120*01	IGKV9-120*01	IGKV9-120*01 F	IGKV9-120*01 F	IGKV14-100*01	IGKV9-120*01	IGKV14-100*01	IGKV17-121*01	IGKV14-100*01	IGKV17-121*01	IGKV17-121*01	IGKV14-100*01	IGKV4-70*01		IGKV9-124*01	IGKV17-121*01
	IGKV9-120*01	IGKV14-100*01	IGKV9-120*01	IGKV14-100*01	IGKV9-120*01	IGKV9-120*01	IGKV9-120*01 F	IGKV9-120*01 F	IGKV14-100*01	IGKV9-120*01	IGKV14-100*01	IGKV17-121*01	IGKV9-120*01	IGKV17-121*01	IGKV17-121*01	IGKV14-100*01	IGKV4-70*01		IGKV9-124*01	IGKV17-121*01
	IGKV9-120*01	IGKV14-100*01	IGKV9-120*01	IGKV14-100*01	IGKV9-120*01	IGKV8-30*01	IGKV9-120*01 F	IGKV9-120*01 F	IGKV3-10*01	IGKV9-120*01	IGKV14-100*01	IGKV17-121*01	IGKV9-120*01	IGKV17-121*01	IGKV17-121*01	IGKV14-100*01	IGKV4-70*01		IGKV9-124*01	IGKV17-121*01
	IGKV9-120*01	IGKV14-100*01	IGKV9-120*01	IGKV14-100*01	IGKV9-120*01	IGKV8-30*01	IGKV9-120*01 F	IGKV9-120*01 F	IGKV14-100*01	IGKV9-120*01	IGKV14-100*01	IGKV17-121*01	IGKV14-100*01	IGKV17-121*01	IGKV17-121*01	IGKV14-100*01	IGKV4-70*01		IGKV9-124*01	IGKV17-121*01
	IGKV9-120*01	IGKV14-100*01	IGKV9-120*01	IGKV14-100*01	IGKV9-120*01	IGKV8-30*01	IGKV9-120*01 F	IGKV9-120*01 F	IGKV14-100*01	IGKV9-120*01	IGKV14-100*01	IGKV17-121*01	IGKV14-100*01	IGKV17-121*01	IGKV17-121*01	IGKV14-100*01	IGKV4-70*01		IGKV9-124*01	IGKV17-121*01
	IGKV9-120*01	IGKV14-100*01	IGKV9-120*01	IGKV14-100*01	IGKV9-120*01	IGKV8-30*01	IGKV9-120*01 F	IGKV9-120*01 F	IGKV14-100*01	IGKV9-120*01	IGKV14-100*01	IGKV17-121*01	IGKV9-120*01	IGKV17-121*01	IGKV17-121*01	IGKV14-100*01	IGKV4-70*01		IGKV9-124*01	IGKV17-121*01
	IGKV9-120*01	IGKV14-100*01	IGKV9-120*01	IGKV14-100*01	IGKV9-120*01	IGKV8-30*01	IGKV9-120*01 F	IGKV9-120*01 F	IGKV14-100*01	IGKV9-120*01	IGKV14-100*01	IGKV17-121*01	IGKV14-100*01	IGKV17-121*01	IGKV17-121*01	IGKV14-100*01	IGKV4-70*01		IGKV9-124*01	IGKV17-121*01
	IGKV9-120*01	IGKV14-100*01	IGKV9-120*01	IGKV14-100*01	IGKV9-120*01	IGKV8-30*01	IGKV9-120*01 F	IGKV9-120*01 F	IGKV14-100*01	IGKV9-120*01	IGKV14-100*01	IGKV17-121*01	IGKV14-100*01	IGKV17-121*01	IGKV17-121*01	IGKV14-100*01	IGKV4-70*01		IGKV9-124*01	IGKV17-121*01
	IGKV9-120*01	IGKV14-100*01	IGKV9-120*01	IGKV14-100*01	IGKV9-120*01	IGKV8-30*01	IGKV9-120*01 F	IGKV9-120*01 F	IGKV14-100*01	IGKV9-120*01	IGKV9-120*01	IGKV17-121*01	IGKV14-100*01	IGKV17-121*01	IGKV17-121*01	IGKV14-100*01	IGKV4-70*01		IGKV9-124*01	IGKV17-121*01
	IGKV9-120*01	IGKV14-100*01	IGKV9-120*01	IGKV14-100*01	IGKV9-120*01	IGKV8-30*01	IGKV9-120*01 F	IGKV9-120*01 F	IGKV14-100*01	IGKV9-120*01	IGKV14-100*01	IGKV17-121*01	IGKV14-100*01	IGKV17-121*01	IGKV4-91*01	IGKV14-100*01	IGKV4-70*01		IGKV9-124*01	IGKV17-121*01
	IGKV9-120*01	IGKV14-100*01	IGKV9-120*01	IGKV14-100*01	IGKV9-120*01	IGKV8-30*01	IGKV9-120*01 F	IGKV14-111*01 F	IGKV14-100*01	IGKV9-120*01	IGKV9-120*01	IGKV17-121*01	IGKV14-100*01	IGKV17-121*01	IGKV4-91*01	IGKV14-100*01	IGKV4-70*01		IGKV9-124*01	IGKV17-121*01
	IGKV9-120*01	IGKV14-100*01	IGKV9-120*01	IGKV14-100*01	IGKV9-120*01	IGKV8-30*01	IGKV9-120*01 F	IGKV9-120*01 F	IGKV1-135*01	IGKV9-120*01	IGKV14-100*01	IGKV17-121*01	IGKV14-100*01	IGKV17-121*01	IGKV4-91*01	IGKV14-100*01	IGKV4-70*01		IGKV9-124*01	IGKV17-121*01
	IGKV9-120*01	IGKV14-100*01	IGKV9-120*01	IGKV14-100*01	IGKV9-120*01	IGKV8-30*01	IGKV9-120*01 F	IGKV9-120*01 F	IGKV14-100*01	IGKV9-120*01	IGKV14-100*01	IGKV17-121*01	IGKV14-100*01	IGKV17-121*01	IGKV17-121*01	IGKV14-100*01	IGKV4-70*01		IGKV9-124*01	IGKV17-121*01
	IGKV9-120*01	IGKV14-100*01	IGKV9-120*01	IGKV14-100*01	IGKV9-120*01	IGKV9-120*01	IGKV9-120*01 F	IGKV14-111*01 F	IGKV14-100*01	IGKV9-120*01	IGKV14-100*01	IGKV17-121*01	IGKV14-100*01	IGKV17-121*01	IGKV17-121*01	IGKV14-100*01	IGKV4-70*01		IGKV9-124*01	IGKV17-121*01
	IGKV9-120*01	IGKV14-100*01	IGKV9-120*01	IGKV14-100*01	IGKV9-120*01	IGKV9-120*01	IGKV9-120*01 F	IGKV9-120*01 F	IGKV14-100*01	IGKV9-120*01	IGKV9-120*01	IGKV17-121*01	IGKV14-100*01	IGKV17-121*01	IGKV4-91*01	IGKV14-100*01	IGKV4-70*01		IGKV9-124*01	IGKV4-68*01
	IGKV9-120*01	IGKV14-100*01	IGKV9-120*01	IGKV14-100*01	IGKV9-120*01	IGKV8-30*01	IGKV9-120*01 F	IGKV14-111*01 F	IGKV14-100*01	IGKV9-120*01	IGKV14-100*01	IGKV17-121*01	IGKV14-100*01	IGKV17-121*01	IGKV4-91*01	IGKV14-100*01	IGKV4-70*01		IGKV9-124*01	IGKV17-121*01
	IGKV9-120*01	IGKV14-100*01	IGKV9-120*01	IGKV14-100*01	IGKV9-120*01	IGKV8-30*01	IGKV9-120*01 F	IGKV9-120*01 F	IGKV14-100*01	IGKV9-120*01	IGKV14-100*01	IGKV17-121*01	IGKV9-120*01	IGKV17-121*01	IGKV17-121*01	IGKV14-100*01	IGKV4-70*01		IGKV9-124*01	IGKV17-121*01
	IGKV9-120*01	IGKV14-100*01	IGKV9-120*01	IGKV14-100*01	IGKV9-120*01	IGKV9-120*01	IGKV9-120*01 F	IGKV9-120*01 F	IGKV14-100*01	IGKV9-120*01	IGKV14-100*01	IGKV17-121*01	IGKV9-120*01	IGKV17-121*01	IGKV17-121*01	IGKV14-100*01	IGKV4-70*01		IGKV9-124*01	IGKV17-121*01
	IGKV9-120*01	IGKV14-100*01	IGKV9-120*01	IGKV14-100*01	IGKV9-120*01	IGKV9-120*01	IGKV9-120*01 F	IGKV9-120*01 F	IGKV14-100*01	IGKV9-120*01	IGKV9-120*01	IGKV17-121*01	IGKV14-100*01	IGKV17-121*01	IGKV17-121*01	IGKV14-100*01	IGKV4-70*01		IGKV9-124*01	IGKV17-121*01
	IGKV9-120*01	IGKV14-100*01	IGKV9-120*01	IGKV14-100*01	IGKV9-120*01	IGKV9-120*01	IGKV9-120*01 F	IGKV9-120*01 F	IGKV14-100*01	IGKV9-120*01	IGKV9-120*01	IGKV17-121*01	IGKV14-100*01	IGKV17-121*01	IGKV4-91*01	IGKV14-100*01	IGKV4-70*01		IGKV9-124*01	IGKV17-121*01
	IGKV9-120*01	IGKV14-100*01	IGKV9-120*01	IGKV14-100*01	IGKV9-120*01	IGKV8-30*01	IGKV9-120*01 F	IGKV9-120*01 F	IGKV14-100*01	IGKV9-120*01	IGKV14-100*01	IGKV17-121*01	IGKV14-100*01	IGKV17-121*01	IGKV4-91*01	IGKV14-100*01	IGKV4-70*01		IGKV9-124*01	IGKV17-121*01
	IGKV9-120*01	IGKV14-100*01	IGKV9-120*01	IGKV14-100*01	IGKV9-120*01	IGKV8-30*01	IGKV9-120*01 F	IGKV9-120*01 F	IGKV17-121*01	IGKV9-120*01	IGKV14-100*01	IGKV17-121*01	IGKV9-120*01	IGKV17-121*01	IGKV17-121*01	IGKV14-100*01	IGKV4-70*01		IGKV9-124*01	IGKV17-121*01
	IGKV9-120*01	IGKV14-100*01	IGKV9-120*01	IGKV14-100*01	IGKV9-120*01	IGKV9-120*01	IGKV9-120*01 F	IGKV9-120*01 F	IGKV14-100*01	IGKV9-120*01	IGKV14-100*01	IGKV17-121*01	IGKV14-100*01	IGKV17-121*01	IGKV17-121*01	IGKV14-100*01	IGKV4-70*01		IGKV9-124*01	IGKV17-121*01
	IGKV9-120*01	IGKV14-100*01	IGKV9-120*01	IGKV14-100*01	IGKV9-120*01	IGKV8-30*01	IGKV9-120*01 F	IGKV9-120*01 F	IGKV14-100*01	IGKV9-120*01	IGKV9-120*01	IGKV17-121*01	IGKV14-100*01	IGKV17-121*01	IGKV17-121*01	IGKV14-100*01	IGKV4-70*01		IGKV9-124*01	IGKV17-121*01
	IGKV9-120*01	IGKV14-100*01	IGKV9-120*01	IGKV14-100*01	IGKV9-120*01	IGKV8-30*01	IGKV9-120*01 F	IGKV9-120*01 F	IGKV14-100*01	IGKV9-120*01	IGKV14-100*01	IGKV17-121*01	IGKV14-100*01	IGKV17-121*01	IGKV4-91*01	IGKV14-100*01	IGKV4-70*01		IGKV9-124*01	IGKV17-121*01
	IGKV9-120*01	IGKV14-100*01	IGKV9-120*01	IGKV14-100*01	IGKV9-120*01	IGKV9-120*01	IGKV9-120*01 F	IGKV9-120*01 F	IGKV14-100*01	IGKV9-120*01	IGKV14-100*01	IGKV17-121*01	IGKV9-120*01	IGKV17-121*01	IGKV17-121*01	IGKV14-100*01	IGKV4-70*01		IGKV9-124*01	IGKV17-121*01
	IGKV9-120*01	IGKV14-100*01	IGKV9-120*01	IGKV14-100*01	IGKV9-120*01	IGKV9-120*01	IGKV9-120*01 F	IGKV9-120*01 F	IGKV14-100*01	IGKV9-120*01	IGKV14-100*01	IGKV17-121*01	IGKV14-100*01	IGKV17-121*01	IGKV17-121*01	IGKV14-100*01	IGKV4-70*01		IGKV9-124*01	IGKV17-121*01
	IGKV9-120*01	IGKV14-100*01	IGKV9-120*01	IGKV14-100*01	IGKV9-120*01	IGKV9-120*01	IGKV9-120*01 F	IGKV9-120*01 F	IGKV14-100*01	IGKV9-120*01	IGKV14-100*01	IGKV17-121*01	IGKV14-100*01	IGKV17-121*01	IGKV4-91*01	IGKV14-100*01	IGKV4-70*01		IGKV9-124*01	IGKV17-121*01
	IGKV9-120*01	IGKV14-100*01	IGKV9-120*01	IGKV14-100*01	IGKV9-120*01	IGKV9-120*01	IGKV9-120*01 F	IGKV14-111*01 F	IGKV14-100*01	IGKV9-120*01	IGKV14-100*01	IGKV17-121*01	IGKV14-100*01	IGKV17-121*01	IGKV17-121*01	IGKV14-100*01	IGKV4-70*01		IGKV9-124*01	IGKV17-121*01
	IGKV9-120*01	IGKV14-100*01	IGKV9-120*01	IGKV14-100*01	IGKV9-120*01	IGKV9-120*01	IGKV9-120*01 F	IGKV9-120*01 F	IGKV14-100*01	IGKV9-120*01	IGKV9-120*01	IGKV17-121*01	IGKV14-100*01	IGKV17-121*01	IGKV17-121*01	IGKV14-100*01	IGKV4-70*01		IGKV9-124*01	IGKV17-121*01
	IGKV9-120*01	IGKV14-100*01	IGKV9-120*01	IGKV14-100*01	IGKV9-120*01	IGKV9-120*01	IGKV9-120*01 F	IGKV9-120*01 F	IGKV14-100*01	IGKV9-120*01	IGKV14-100*01	IGKV17-121*01	IGKV9-120*01	IGKV17-121*01	IGKV17-121*01	IGKV14-100*01	IGKV4-70*01		IGKV9-124*01	IGKV17-121*01
	IGKV9-120*01	IGKV14-100*01	IGKV9-120*01	IGKV14-100*01	IGKV9-120*01	IGKV8-30*01	IGKV9-120*01 F	IGKV14-111*01 F	IGKV14-100*01	IGKV9-120*01	IGKV14-100*01	IGKV17-121*01	IGKV14-100*01	IGKV17-121*01	IGKV4-91*01	IGKV14-100*01	IGKV4-70*01		IGKV9-124*01	IGKV17-121*01
	IGKV9-120*01	IGKV14-100*01	IGKV9-120*01	IGKV14-100*01	IGKV9-120*01	IGKV8-30*01	IGKV9-120*01 F	IGKV14-111*01 F	IGKV14-100*01	IGKV9-120*01	IGKV9-120*01	IGKV17-121*01	IGKV9-120*01	IGKV17-121*01	IGKV17-121*01	IGKV14-100*01	IGKV4-70*01		IGKV9-124*01	IGKV17-121*01
	IGKV9-120*01	IGKV14-100*01	IGKV9-120*01	IGKV14-100*01	IGKV9-120*01	IGKV8-30*01	IGKV9-120*01 F	IGKV9-120*01 F	IGKV14-100*01	IGKV9-120*01	IGKV14-100*01	IGKV17-121*01	IGKV9-120*01	IGKV17-121*01	IGKV17-121*01	IGKV14-100*01	IGKV4-70*01		IGKV9-124*01	IGKV17-121*01
	IGKV9-120*01	IGKV14-100*01	IGKV9-120*01	IGKV14-100*01	IGKV9-120*01	IGKV9-120*01	IGKV9-120*01 F	IGKV9-120*01 F	IGKV14-100*01	IGKV9-120*01	IGKV14-100*01	IGKV17-121*01	IGKV9-120*01	IGKV17-121*01	IGKV4-91*01	IGKV14-100*01	IGKV4-70*01		IGKV9-124*01	IGKV17-121*01
	IGKV9-120*01	IGKV14-100*01	IGKV9-120*01	IGKV14-100*01	IGKV9-120*01	IGKV8-30*01	IGKV9-120*01 F	IGKV9-120*01 F	IGKV14-100*01	IGKV9-120*01	IGKV14-100*01	IGKV17-121*01	IGKV9-120*01	IGKV17-121*01	IGKV17-121*01	IGKV14-100*01	IGKV4-70*01		IGKV9-124*01	IGKV17-121*01
	IGKV9-120*01	IGKV14-100*01	IGKV9-120*01	IGKV14-100*01	IGKV9-120*01	IGKV8-30*01	IGKV9-120*01 F	IGKV14-111*01 F	IGKV14-100*01	IGKV9-120*01	IGKV14-100*01	IGKV17-121*01	IGKV9-120*01	IGKV17-121*01	IGKV17-121*01	IGKV14-100*01	IGKV4-70*01		IGKV9-124*01	IGKV17-121*01
	IGKV9-120*01	IGKV14-100*01	IGKV9-120*01	IGKV14-100*01	IGKV9-120*01	IGKV8-30*01	IGKV9-120*01 F	IGKV9-120*01 F	IGKV14-100*01	IGKV9-120*01	IGKV14-100*01	IGKV17-121*01	IGKV9-120*01	IGKV17-121*01	IGKV17-121*01	IGKV14-100*01	IGKV4-70*01		IGKV9-124*01	IGKV17-121*01
	IGKV9-120*01	IGKV14-100*01	IGKV9-120*01	IGKV14-100*01	IGKV9-120*01	IGKV9-120*01	IGKV9-120*01 F	IGKV14-111*01 F	IGKV14-100*01	IGKV9-120*01	IGKV9-120*01	IGKV17-121*01	IGKV14-100*01	IGKV17-121*01	IGKV17-121*01	IGKV14-100*01	IGKV4-70*01		IGKV9-124*01	IGKV17-121*01
	IGKV9-120*01	IGKV14-100*01	IGKV9-120*01	IGKV14-100*01	IGKV9-120*01	IGKV8-30*01	IGKV9-120*01 F	IGKV9-120*01 F	IGKV14-100*01	IGKV9-120*01	IGKV14-100*01	IGKV17-121*01	IGKV9-120*01	IGKV17-121*01	IGKV17-121*01	IGKV14-100*01	IGKV4-70*01		IGKV9-124*01	IGKV17-121*01
	IGKV9-120*01	IGKV14-100*01	IGKV9-120*01	IGKV14-100*01	IGKV9-120*01	IGKV8-30*01	IGKV9-120*01 F	IGKV9-120*01 F	IGKV14-100*01	IGKV9-120*01	IGKV14-100*01	IGKV17-121*01	IGKV9-120*01	IGKV17-121*01	IGKV17-121*01	IGKV14-100*01	IGKV4-70*01		IGKV9-124*01	IGKV17-121*01
	IGKV9-120*01	IGKV14-100*01	IGKV9-120*01	IGKV14-100*01	IGKV9-120*01	IGKV9-120*01	IGKV9-120*01 F	IGKV14-111*01 F	IGKV14-100*01	IGKV9-120*01	IGKV9-120*01	IGKV17-121*01	IGKV14-100*01	IGKV17-121*01	IGKV17-121*01	IGKV14-100*01	IGKV4-70*01		IGKV9-124*01	IGKV17-121*01
	IGKV9-120*01	IGKV14-100*01	IGKV9-120*01	IGKV14-100*01	IGKV9-120*01	IGKV9-120*01	IGKV9-120*01 F	IGKV9-120*01 F	IGKV14-100*01	IGKV9-120*01	IGKV14-100*01	IGKV17-121*01	IGKV9-120*01	IGKV17-121*01	IGKV17-121*01	IGKV14-100*01	IGKV4-70*01		IGKV9-124*01	IGKV17-121*01
	IGKV9-120*01	IGKV14-100*01	IGKV9-120*01	IGKV14-100*01	IGKV9-120*01	IGKV9-120*01	IGKV9-120*01 F	IGKV9-120*01 F	IGKV1-135*01	IGKV9-120*01	IGKV14-100*01	IGKV17-121*01	IGKV9-120*01	IGKV17-121*01	IGKV17-121*01	IGKV14-100*01	IGKV4-70*01		IGKV9-124*01	IGKV17-121*01
	IGKV9-120*01	IGKV14-100*01	IGKV9-120*01	IGKV14-100*01	IGKV9-120*01	IGKV9-120*01	IGKV9-120*01 F	IGKV9-120*01 F	IGKV14-100*01	IGKV9-120*01	IGKV9-120*01	IGKV17-121*01	IGKV14-100*01	IGKV17-121*01	IGKV17-121*01	IGKV14-100*01	IGKV4-70*01		IGKV9-124*01	IGKV17-121*01
	IGKV9-120*01	IGKV14-100*01	IGKV9-120*01	IGKV14-100*01	IGKV9-120*01	IGKV9-120*01	IGKV9-120*01 F	IGKV9-120*01 F	IGKV14-100*01	IGKV9-120*01	IGKV14-100*01	IGKV17-121*01	IGKV14-100*01	IGKV17-121*01	IGKV17-121*01	IGKV14-100*01	IGKV4-70*01		IGKV9-124*01	IGKV17-121*01
	IGKV9-120*01	IGKV14-100*01	IGKV9-120*01	IGKV14-100*01	IGKV9-120*01	IGKV9-120*01	IGKV9-120*01 F	IGKV1-135*01 F	IGKV14-100*01	IGKV9-120*01	IGKV9-120*01	IGKV17-121*01	IGKV14-100*01	IGKV17-121*01	IGKV17-121*01	IGKV14-100*01	IGKV4-70*01		IGKV9-124*01	IGKV17-121*01
	IGKV9-120*01	IGKV14-100*01	IGKV9-120*01	IGKV14-100*01	IGKV9-120*01	IGKV8-30*01	IGKV9-120*01 F	IGKV9-120*01 F	IGKV14-100*01	IGKV9-120*01	IGKV9-120*01	IGKV17-121*01	IGKV14-100*01	IGKV17-121*01	IGKV17-121*01	IGKV14-100*01	IGKV4-70*01		IGKV9-124*01	IGKV17-121*01
	IGKV9-120*01	IGKV14-100*01	IGKV9-120*01	IGKV14-100*01	IGKV9-120*01	IGKV8-30*01	IGKV9-120*01 F	IGKV9-120*01 F	IGKV14-100*01	IGKV9-120*01	IGKV9-120*01	IGKV17-121*01	IGKV14-100*01	IGKV17-121*01	IGKV17-121*01	IGKV14-100*01	IGKV4-70*01		IGKV9-124*01	IGKV17-121*01
	IGKV9-120*01	IGKV14-100*01	IGKV9-120*01	IGKV14-100*01	IGKV9-120*01	IGKV8-30*01	IGKV9-120*01 F	IGKV9-120*01 F	IGKV14-100*01	IGKV9-120*01	IGKV14-100*01	IGKV17-121*01	IGKV14-100*01	IGKV17-121*01	IGKV17-121*01	IGKV14-100*01	IGKV4-70*01		IGKV9-124*01	IGKV17-121*01
	IGKV9-120*01	IGKV14-100*01	IGKV9-120*01	IGKV14-100*01	IGKV9-120*01	IGKV8-30*01	IGKV9-120*01 F	IGKV9-120*01 F	IGKV14-100*01	IGKV9-120*01	IGKV14-100*01	IGKV17-121*01	IGKV14-100*01	IGKV17-121*01	IGKV17-121*01	IGKV14-100*01	IGKV4-70*01		IGKV9-124*01	IGKV17-121*01
	IGKV9-120*01	IGKV14-100*01	IGKV9-120*01	IGKV14-100*01	IGKV9-120*01	IGKV8-30*01	IGKV9-120*01 F	IGKV9-120*01 F	IGKV17-121*01	IGKV9-120*01	IGKV9-120*01	IGKV17-121*01	IGKV14-100*01	IGKV17-121*01	IGKV17-121*01	IGKV14-100*01	IGKV4-70*01		IGKV9-124*01	IGKV17-121*01
	IGKV9-120*01	IGKV14-100*01	IGKV9-120*01	IGKV14-100*01	IGKV9-120*01	IGKV8-30*01	IGKV9-120*01 F	IGKV9-120*01 F	IGKV17-121*01	IGKV9-120*01	IGKV9-120*01	IGKV17-121*01	IGKV14-100*01	IGKV17-121*01	IGKV17-121*01	IGKV14-100*01	IGKV4-70*01		IGKV9-124*01	IGKV17-121*01
	IGKV9-120*01	IGKV14-100*01	IGKV9-120*01	IGKV14-100*01	IGKV9-120*01	IGKV9-120*01	IGKV9-120*01 F	IGKV9-120*01 F	IGKV14-100*01	IGKV9-120*01	IGKV14-100*01	IGKV17-121*01	IGKV14-100*01	IGKV17-121*01	IGKV17-121*01	IGKV14-100*01	IGKV4-70*01		IGKV9-124*01	IGKV17-121*01
	IGKV9-120*01	IGKV14-100*01	IGKV9-120*01	IGKV14-100*01	IGKV9-120*01	IGKV9-120*01	IGKV9-120*01 F	IGKV9-120*01 F	IGKV14-100*01	IGKV9-120*01	IGKV14-100*01	IGKV17-121*01	IGKV14-100*01	IGKV17-121*01	IGKV17-121*01	IGKV14-100*01	IGKV4-70*01		IGKV9-124*01	IGKV17-121*01
	IGKV9-120*01	IGKV14-100*01	IGKV9-120*01	IGKV14-100*01	IGKV9-120*01	IGKV8-30*01	IGKV9-120*01 F	IGKV9-120*01 F	IGKV14-100*01	IGKV9-120*01	IGKV9-120*01	IGKV17-121*01	IGKV14-100*01	IGKV17-121*01	IGKV17-121*01	IGKV14-100*01	IGKV4-70*01		IGKV9-124*01	IGKV17-121*01
	IGKV9-120*01	IGKV14-100*01	IGKV9-120*01	IGKV14-100*01	IGKV9-120*01	IGKV8-30*01	IGKV9-120*01 F	IGKV14-111*01 F	IGKV14-100*01	IGKV9-120*01	IGKV9-120*01	IGKV17-121*01	IGKV14-100*01	IGKV17-121*01	IGKV17-121*01	IGKV14-100*01	IGKV4-70*01		IGKV9-124*01	IGKV17-121*01
	IGKV9-120*01	IGKV14-100*01	IGKV9-120*01	IGKV14-100*01	IGKV9-120*01	IGKV8-30*01	IGKV9-120*01 F	IGKV9-120*01 F	IGKV14-100*01	IGKV9-120*01	IGKV9-120*01	IGKV17-121*01	IGKV9-120*01	IGKV17-121*01	IGKV4-91*01	IGKV14-100*01	IGKV4-70*01		IGKV9-124*01	IGKV17-121*01
	IGKV9-120*01	IGKV14-100*01	IGKV9-120*01	IGKV14-100*01	IGKV9-120*01	IGKV9-120*01	IGKV9-120*01 F	IGKV9-120*01 F	IGKV14-100*01	IGKV9-120*01	IGKV9-120*01	IGKV17-121*01	IGKV9-120*01	IGKV17-121*01	IGKV17-121*01	IGKV14-100*01	IGKV4-70*01		IGKV9-124*01	IGKV17-121*01
	IGKV9-120*01	IGKV14-100*01	IGKV9-120*01	IGKV14-100*01	IGKV9-120*01	IGKV9-120*01	IGKV9-120*01 F	IGKV9-120*01 F	IGKV14-100*01	IGKV9-120*01	IGKV9-120*01	IGKV17-121*01	IGKV14-100*01	IGKV17-121*01	IGKV17-121*01	IGKV14-100*01	IGKV4-70*01		IGKV9-124*01	IGKV17-121*01
	IGKV9-120*01	IGKV14-100*01	IGKV9-120*01	IGKV14-100*01	IGKV9-120*01	IGKV8-30*01	IGKV9-120*01 F	IGKV9-120*01 F	IGKV14-100*01	IGKV9-120*01	IGKV14-100*01	IGKV17-121*01	IGKV14-100*01	IGKV17-121*01	IGKV17-121*01	IGKV14-100*01	IGKV4-70*01		IGKV9-124*01	IGKV17-121*01
	IGKV9-120*01	IGKV14-100*01	IGKV9-120*01	IGKV14-100*01	IGKV9-120*01	IGKV8-30*01	IGKV9-120*01 F	IGKV9-120*01 F	IGKV14-100*01	IGKV9-120*01	IGKV9-120*01	IGKV17-121*01	IGKV9-120*01	IGKV17-121*01	IGKV4-91*01	IGKV14-100*01	IGKV4-70*01		IGKV9-124*01	IGKV17-121*01
	IGKV9-120*01	IGKV14-100*01	IGKV9-120*01	IGKV14-100*01	IGKV9-120*01	IGKV9-120*01	IGKV9-120*01 F	IGKV9-120*01 F	IGKV14-100*01	IGKV9-120*01	IGKV9-120*01	IGKV17-121*01	IGKV14-100*01	IGKV17-121*01	IGKV17-121*01	IGKV14-100*01	IGKV4-70*01		IGKV9-124*01	IGKV17-121*01
	IGKV9-120*01	IGKV14-100*01	IGKV9-120*01	IGKV14-100*01	IGKV9-120*01	IGKV9-120*01	IGKV9-120*01 F	IGKV9-120*01 F	IGKV14-100*01	IGKV9-120*01	IGKV14-100*01	IGKV17-121*01	IGKV14-100*01	IGKV17-121*01	IGKV17-121*01	IGKV14-100*01	IGKV4-70*01		IGKV9-124*01	IGKV17-121*01
	IGKV9-120*01	IGKV14-100*01	IGKV9-120*01	IGKV14-100*01	IGKV9-120*01	IGKV8-30*01	IGKV9-120*01 F	IGKV9-120*01 F	IGKV14-100*01	IGKV9-120*01	IGKV14-100*01	IGKV17-121*01	IGKV14-100*01	IGKV17-121*01	IGKV17-121*01	IGKV14-100*01	IGKV4-70*01		IGKV9-124*01	IGKV17-121*01
	IGKV9-120*01	IGKV14-100*01	IGKV9-120*01	IGKV14-100*01	IGKV9-120*01	IGKV8-30*01	IGKV9-120*01 F	IGKV9-120*01 F	IGKV17-121*01	IGKV9-120*01	IGKV14-100*01	IGKV17-121*01	IGKV9-120*01	IGKV17-121*01	IGKV17-121*01	IGKV14-100*01	IGKV4-70*01		IGKV9-124*01	IGKV17-121*01
	IGKV9-120*01	IGKV14-100*01	IGKV9-120*01	IGKV14-100*01	IGKV9-120*01	IGKV8-30*01	IGKV9-120*01 F	IGKV9-120*01 F	IGKV14-100*01	IGKV9-120*01	IGKV14-100*01	IGKV17-121*01	IGKV9-120*01	IGKV17-121*01	IGKV4-91*01	IGKV14-100*01	IGKV4-70*01		IGKV9-124*01	IGKV17-121*01
	IGKV9-120*01	IGKV14-100*01	IGKV9-120*01	IGKV14-100*01	IGKV9-120*01	IGKV9-120*01	IGKV9-120*01 F	IGKV9-120*01 F	IGKV17-121*01	IGKV9-120*01	IGKV9-120*01	IGKV17-121*01	IGKV14-100*01	IGKV17-121*01	IGKV17-121*01	IGKV14-100*01	IGKV4-70*01		IGKV9-124*01	IGKV17-121*01
	IGKV9-120*01	IGKV14-100*01	IGKV9-120*01	IGKV14-100*01	IGKV9-120*01	IGKV8-30*01	IGKV9-120*01 F	IGKV9-120*01 F	IGKV14-100*01	IGKV9-120*01	IGKV14-100*01	IGKV17-121*01	IGKV9-120*01	IGKV17-121*01	IGKV4-91*01	IGKV14-100*01	IGKV4-70*01		IGKV9-124*01	IGKV17-121*01
	IGKV9-120*01	IGKV14-100*01	IGKV9-120*01	IGKV14-100*01	IGKV9-120*01	IGKV9-120*01	IGKV9-120*01 F	IGKV9-120*01 F	IGKV14-100*01	IGKV9-120*01	IGKV9-120*01	IGKV17-121*01	IGKV14-100*01	IGKV17-121*01	IGKV4-91*01	IGKV14-100*01	IGKV4-70*01		IGKV9-124*01	IGKV17-121*01
	IGKV9-120*01	IGKV14-100*01	IGKV9-120*01	IGKV14-100*01	IGKV9-120*01	IGKV8-30*01	IGKV9-120*01 F	IGKV9-120*01 F	IGKV1-135*01	IGKV9-120*01	IGKV9-120*01	IGKV17-121*01	IGKV14-100*01	IGKV17-121*01	IGKV4-91*01	IGKV14-100*01	IGKV4-70*01		IGKV9-124*01	IGKV17-121*01
	IGKV9-120*01	IGKV14-100*01	IGKV9-120*01	IGKV14-100*01	IGKV9-120*01	IGKV8-30*01	IGKV9-120*01 F	IGKV9-120*01 F	IGKV14-100*01	IGKV9-120*01	IGKV14-100*01	IGKV17-121*01	IGKV14-100*01	IGKV17-121*01	IGKV4-91*01	IGKV14-100*01	IGKV4-70*01		IGKV9-124*01	IGKV17-121*01
	IGKV9-120*01	IGKV14-100*01	IGKV9-120*01	IGKV14-100*01	IGKV9-120*01	IGKV9-120*01	IGKV9-120*01 F	IGKV9-120*01 F	IGKV14-100*01	IGKV9-120*01	IGKV9-120*01	IGKV17-121*01	IGKV14-100*01	IGKV17-121*01	IGKV4-91*01	IGKV14-100*01	IGKV4-70*01		IGKV9-124*01	IGKV17-121*01
	IGKV9-120*01	IGKV14-100*01	IGKV9-120*01	IGKV14-100*01	IGKV9-120*01	IGKV8-30*01	IGKV9-120*01 F	IGKV9-120*01 F	IGKV14-100*01	IGKV9-120*01	IGKV9-120*01	IGKV17-121*01	IGKV14-100*01	IGKV17-121*01	IGKV17-121*01	IGKV14-100*01	IGKV4-70*01		IGKV9-124*01	IGKV17-121*01
	IGKV9-120*01	IGKV14-100*01	IGKV9-120*01	IGKV14-100*01	IGKV9-120*01	IGKV8-30*01	IGKV9-120*01 F	IGKV9-120*01 F	IGKV14-100*01	IGKV9-120*01	IGKV9-120*01	IGKV17-121*01	IGKV14-100*01	IGKV17-121*01	IGKV17-121*01	IGKV14-100*01	IGKV4-70*01		IGKV9-124*01	IGKV17-121*01
	IGKV9-120*01	IGKV14-100*01	IGKV9-120*01	IGKV14-100*01	IGKV9-120*01	IGKV9-120*01	IGKV9-120*01 F	IGKV9-120*01 F	IGKV14-100*01	IGKV9-120*01	IGKV9-120*01	IGKV17-121*01	IGKV14-100*01	IGKV17-121*01	IGKV17-121*01	IGKV14-100*01	IGKV4-70*01		IGKV9-124*01	IGKV17-121*01
	IGKV9-120*01	IGKV14-100*01	IGKV9-120*01	IGKV14-100*01	IGKV9-120*01	IGKV8-30*01	IGKV9-120*01 F	IGKV9-120*01 F	IGKV14-100*01	IGKV9-120*01	IGKV9-120*01	IGKV17-121*01	IGKV14-100*01	IGKV17-121*01	IGKV17-121*01	IGKV14-100*01	IGKV4-70*01		IGKV9-124*01	IGKV17-121*01
	IGKV9-120*01	IGKV14-100*01	IGKV9-120*01	IGKV14-100*01	IGKV9-120*01	IGKV8-30*01	IGKV9-120*01 F	IGKV9-120*01 F	IGKV17-121*01	IGKV9-120*01	IGKV14-100*01	IGKV17-121*01	IGKV14-100*01	IGKV17-121*01	IGKV17-121*01	IGKV14-100*01	IGKV4-70*01		IGKV9-124*01	IGKV17-121*01
	IGKV9-120*01	IGKV14-100*01	IGKV9-120*01	IGKV14-100*01	IGKV9-120*01	IGKV8-30*01	IGKV9-120*01 F	IGKV14-111*01 F	IGKV14-100*01	IGKV9-120*01	IGKV14-100*01	IGKV17-121*01	IGKV14-100*01	IGKV17-121*01	IGKV17-121*01	IGKV14-100*01	IGKV4-70*01		IGKV9-124*01	IGKV17-121*01
	IGKV9-120*01	IGKV14-100*01	IGKV9-120*01	IGKV14-100*01	IGKV9-120*01	IGKV8-30*01	IGKV9-120*01 F	IGKV9-120*01 F	IGKV14-100*01	IGKV9-120*01	IGKV14-100*01	IGKV17-121*01	IGKV14-100*01	IGKV17-121*01	IGKV17-121*01	IGKV14-100*01	IGKV4-70*01		IGKV9-124*01	IGKV17-121*01
	IGKV9-120*01	IGKV14-100*01	IGKV9-120*01	IGKV14-100*01	IGKV9-120*01	IGKV8-30*01	IGKV9-120*01 F	IGKV14-111*01 F	IGKV14-100*01	IGKV9-120*01	IGKV14-100*01	IGKV17-121*01	IGKV14-100*01	IGKV17-121*01	IGKV17-121*01	IGKV14-100*01	IGKV4-70*01		IGKV9-124*01	IGKV17-121*01
	IGKV9-120*01	IGKV14-100*01	IGKV9-120*01	IGKV14-100*01	IGKV9-120*01	IGKV8-30*01	IGKV9-120*01 F	IGKV14-111*01 F	IGKV14-100*01	IGKV9-120*01	IGKV9-120*01	IGKV17-121*01	IGKV14-100*01	IGKV17-121*01	IGKV4-91*01	IGKV14-100*01	IGKV4-70*01		IGKV9-124*01	IGKV17-121*01
	IGKV9-120*01	IGKV14-100*01	IGKV9-120*01	IGKV14-100*01	IGKV9-120*01	IGKV8-30*01	IGKV9-120*01 F	IGKV14-111*01 F	IGKV17-121*01	IGKV9-120*01	IGKV14-100*01	IGKV17-121*01	IGKV9-120*01	IGKV17-121*01	IGKV17-121*01	IGKV14-100*01	IGKV4-70*01		IGKV9-124*01	IGKV17-121*01
	IGKV9-120*01	IGKV14-100*01	IGKV9-120*01	IGKV14-100*01	IGKV9-120*01	IGKV9-120*01	IGKV9-120*01 F	IGKV9-120*01 F	IGKV14-100*01	IGKV9-120*01	IGKV14-100*01	IGKV17-121*01	IGKV9-120*01	IGKV17-121*01	IGKV17-121*01	IGKV14-100*01	IGKV4-70*01		IGKV9-124*01	IGKV17-121*01
	IGKV9-120*01	IGKV14-100*01	IGKV9-120*01	IGKV14-100*01	IGKV9-120*01	IGKV9-120*01	IGKV9-120*01 F	IGKV9-120*01 F	IGKV1-135*01	IGKV9-120*01	IGKV14-100*01	IGKV17-121*01	IGKV14-100*01	IGKV17-121*01	IGKV17-121*01	IGKV14-100*01	IGKV4-70*01		IGKV9-124*01	IGKV17-121*01
	IGKV9-120*01	IGKV14-100*01	IGKV9-120*01	IGKV14-100*01	IGKV9-120*01	IGKV8-30*01	IGKV9-120*01 F	IGKV9-120*01 F	IGKV14-100*01	IGKV9-120*01	IGKV14-100*01	IGKV17-121*01	IGKV14-100*01	IGKV17-121*01	IGKV17-121*01	IGKV14-100*01	IGKV4-70*01		IGKV9-124*01	IGKV17-121*01
	IGKV9-120*01	IGKV14-100*01	IGKV9-120*01	IGKV14-100*01	IGKV9-120*01	IGKV8-30*01	IGKV9-120*01 F	IGKV9-120*01 F	IGKV14-100*01	IGKV9-120*01	IGKV14-100*01	IGKV17-121*01	IGKV14-100*01	IGKV17-121*01	IGKV17-121*01	IGKV14-100*01	IGKV4-70*01		IGKV9-124*01	IGKV17-121*01
	IGKV9-120*01	IGKV14-100*01	IGKV9-120*01	IGKV14-100*01	IGKV9-120*01	IGKV8-30*01	IGKV9-120*01 F	IGKV9-120*01 F	IGKV14-100*01	IGKV9-120*01	IGKV14-100*01	IGKV17-121*01	IGKV14-100*01	IGKV17-121*01	IGKV17-121*01	IGKV14-100*01	IGKV4-70*01		IGKV9-124*01	IGKV17-121*01
	IGKV9-120*01	IGKV14-100*01	IGKV9-120*01	IGKV14-100*01	IGKV9-120*01	IGKV9-120*01	IGKV9-120*01 F	IGKV9-120*01 F	IGKV14-100*01	IGKV9-120*01	IGKV14-100*01	IGKV17-121*01	IGKV14-100*01	IGKV17-121*01	IGKV17-121*01	IGKV14-100*01	IGKV4-70*01		IGKV9-124*01	IGKV17-121*01
	IGKV9-120*01	IGKV14-100*01	IGKV9-120*01	IGKV14-100*01	IGKV9-120*01	IGKV8-30*01	IGKV9-120*01 F	IGKV9-120*01 F	IGKV14-100*01	IGKV9-120*01	IGKV14-100*01	IGKV17-121*01	IGKV14-100*01	IGKV17-121*01	IGKV17-121*01	IGKV14-100*01	IGKV4-70*01		IGKV9-124*01	IGKV17-121*01
	IGKV9-120*01	IGKV14-100*01	IGKV9-120*01	IGKV14-100*01	IGKV9-120*01	IGKV8-30*01	IGKV9-120*01 F	IGKV9-120*01 F	IGKV14-100*01	IGKV9-120*01	IGKV14-100*01	IGKV17-121*01	IGKV9-120*01	IGKV17-121*01	IGKV17-121*01	IGKV14-100*01	IGKV4-70*01		IGKV9-124*01	IGKV17-121*01
	IGKV9-120*01	IGKV14-100*01	IGKV9-120*01	IGKV14-100*01	IGKV9-120*01	IGKV8-30*01	IGKV9-120*01 F	IGKV9-120*01 F	IGKV14-100*01	IGKV9-120*01	IGKV14-100*01	IGKV17-121*01	IGKV9-120*01	IGKV17-121*01	IGKV17-121*01	IGKV14-100*01	IGKV4-70*01		IGKV9-124*01	IGKV17-121*01
	IGKV9-120*01	IGKV14-100*01	IGKV9-120*01	IGKV14-100*01	IGKV9-120*01	IGKV8-30*01	IGKV9-120*01 F	IGKV9-120*01 F	IGKV14-100*01	IGKV9-120*01	IGKV14-100*01	IGKV17-121*01	IGKV14-100*01	IGKV17-121*01	IGKV17-121*01	IGKV14-100*01	IGKV4-70*01		IGKV9-124*01	IGKV17-121*01
	IGKV9-120*01	IGKV14-100*01	IGKV9-120*01	IGKV14-100*01	IGKV9-120*01	IGKV9-120*01	IGKV9-120*01 F	IGKV9-120*01 F	IGKV14-100*01	IGKV9-120*01	IGKV14-100*01	IGKV17-121*01	IGKV9-120*01	IGKV17-121*01	IGKV17-121*01	IGKV14-100*01	IGKV4-70*01		IGKV9-124*01	IGKV17-121*01
	IGKV9-120*01	IGKV14-100*01	IGKV9-120*01	IGKV14-100*01	IGKV9-120*01	IGKV8-30*01	IGKV9-120*01 F	IGKV9-120*01 F	IGKV14-100*01	IGKV9-120*01	IGKV14-100*01	IGKV17-121*01	IGKV14-100*01	IGKV17-121*01	IGKV4-91*01	IGKV14-100*01	IGKV4-70*01		IGKV9-124*01	IGKV17-121*01
	IGKV9-120*01	IGKV14-100*01	IGKV9-120*01	IGKV14-100*01	IGKV9-120*01	IGKV9-120*01	IGKV9-120*01 F	IGKV14-111*01 F	IGKV17-121*01	IGKV9-120*01	IGKV9-120*01	IGKV17-121*01	IGKV14-100*01	IGKV17-121*01	IGKV17-121*01	IGKV14-100*01	IGKV4-70*01		IGKV9-124*01	IGKV17-121*01
	IGKV9-120*01	IGKV14-100*01	IGKV9-120*01	IGKV14-100*01	IGKV9-120*01	IGKV8-30*01	IGKV9-120*01 F	IGKV9-120*01 F	IGKV14-100*01	IGKV9-120*01	IGKV14-100*01	IGKV17-121*01	IGKV14-100*01	IGKV17-121*01	IGKV17-121*01	IGKV14-100*01	IGKV4-70*01		IGKV9-124*01	IGKV17-121*01
	IGKV9-120*01	IGKV14-100*01	IGKV9-120*01	IGKV14-100*01	IGKV9-120*01	IGKV8-30*01	IGKV9-120*01 F	IGKV9-120*01 F	IGKV14-100*01	IGKV9-120*01	IGKV14-100*01	IGKV17-121*01	IGKV9-120*01	IGKV17-121*01	IGKV17-121*01	IGKV14-100*01	IGKV4-70*01		IGKV9-124*01	IGKV17-121*01
	IGKV9-120*01	IGKV14-100*01	IGKV9-120*01	IGKV14-100*01	IGKV9-120*01	IGKV8-30*01	IGKV9-120*01 F	IGKV9-120*01 F	IGKV14-100*01	IGKV9-120*01	IGKV14-100*01	IGKV17-121*01	IGKV14-100*01	IGKV17-121*01	IGKV17-121*01	IGKV14-100*01	IGKV4-70*01		IGKV9-124*01	IGKV17-121*01
	IGKV9-120*01	IGKV14-100*01	IGKV9-120*01	IGKV14-100*01	IGKV9-120*01	IGKV8-30*01	IGKV9-120*01 F	IGKV9-120*01 F	IGKV14-100*01	IGKV9-120*01	IGKV14-100*01	IGKV17-121*01	IGKV14-100*01	IGKV17-121*01	IGKV4-91*01	IGKV14-100*01	IGKV4-70*01		IGKV9-124*01	IGKV17-121*01
	IGKV9-120*01	IGKV14-100*01	IGKV9-120*01	IGKV14-100*01	IGKV9-120*01	IGKV8-30*01	IGKV9-120*01 F	IGKV9-120*01 F	IGKV14-100*01	IGKV9-120*01	IGKV9-120*01	IGKV17-121*01	IGKV14-100*01	IGKV17-121*01	IGKV17-121*01	IGKV14-100*01	IGKV4-70*01		IGKV9-124*01	IGKV17-121*01
	IGKV9-120*01	IGKV14-100*01	IGKV9-120*01	IGKV14-100*01	IGKV9-120*01	IGKV8-30*01	IGKV9-120*01 F	IGKV9-120*01 F	IGKV17-121*01	IGKV9-120*01	IGKV14-100*01	IGKV17-121*01	IGKV14-100*01	IGKV17-121*01	IGKV4-91*01	IGKV14-100*01	IGKV4-70*01		IGKV9-124*01	IGKV17-121*01
	IGKV9-120*01	IGKV14-100*01	IGKV9-120*01	IGKV14-100*01	IGKV9-120*01	IGKV8-30*01	IGKV9-120*01 F	IGKV9-120*01 F	IGKV4-59*01	IGKV9-120*01	IGKV9-120*01	IGKV17-121*01	IGKV14-100*01	IGKV17-121*01	IGKV17-121*01	IGKV14-100*01	IGKV4-70*01		IGKV9-124*01	IGKV17-121*01
	IGKV9-120*01	IGKV14-100*01	IGKV9-120*01	IGKV14-100*01	IGKV9-120*01	IGKV8-30*01	IGKV9-120*01 F	IGKV9-120*01 F	IGKV17-121*01	IGKV9-120*01	IGKV14-100*01	IGKV17-121*01	IGKV14-100*01	IGKV17-121*01	IGKV17-121*01	IGKV14-100*01	IGKV4-70*01		IGKV9-124*01	IGKV17-121*01
	IGKV9-120*01	IGKV14-100*01	IGKV9-120*01	IGKV14-100*01	IGKV9-120*01	IGKV9-120*01	IGKV9-120*01 F	IGKV9-120*01 F	IGKV14-100*01	IGKV9-120*01	IGKV14-100*01	IGKV17-121*01	IGKV14-100*01	IGKV17-121*01	IGKV17-121*01	IGKV14-100*01	IGKV4-70*01		IGKV9-124*01	IGKV17-121*01
	IGKV9-120*01	IGKV14-100*01	IGKV9-120*01	IGKV14-100*01	IGKV9-120*01	IGKV8-30*01	IGKV9-120*01 F	IGKV9-120*01 F	IGKV17-121*01	IGKV9-120*01	IGKV9-120*01	IGKV17-121*01	IGKV9-120*01	IGKV17-121*01	IGKV4-91*01	IGKV14-100*01	IGKV4-70*01		IGKV9-124*01	IGKV17-121*01
	IGKV9-120*01	IGKV14-100*01	IGKV9-120*01	IGKV14-100*01	IGKV9-120*01	IGKV8-30*01	IGKV9-120*01 F	IGKV9-120*01 F	IGKV14-100*01	IGKV9-120*01	IGKV14-100*01	IGKV17-121*01	IGKV14-100*01	IGKV17-121*01	IGKV17-121*01	IGKV14-100*01	IGKV4-70*01		IGKV9-124*01	IGKV17-121*01
	IGKV9-120*01	IGKV14-100*01	IGKV9-120*01	IGKV14-100*01	IGKV9-120*01	IGKV8-30*01	IGKV9-120*01 F	IGKV9-120*01 F	IGKV14-100*01	IGKV9-120*01	IGKV9-120*01	IGKV17-121*01	IGKV14-100*01	IGKV17-121*01	IGKV4-91*01	IGKV14-100*01	IGKV4-70*01		IGKV9-124*01	IGKV17-121*01
	IGKV9-120*01	IGKV14-100*01	IGKV9-120*01	IGKV14-100*01	IGKV9-120*01	IGKV9-120*01	IGKV9-120*01 F	IGKV9-120*01 F	IGKV1-135*01	IGKV9-120*01	IGKV14-100*01	IGKV17-121*01	IGKV14-100*01	IGKV17-121*01	IGKV17-121*01	IGKV14-100*01	IGKV4-70*01		IGKV9-124*01	IGKV17-121*01
	IGKV9-120*01	IGKV14-100*01	IGKV9-120*01	IGKV14-100*01	IGKV9-120*01	IGKV9-120*01	IGKV9-120*01 F	IGKV9-120*01 F	IGKV14-100*01	IGKV9-120*01	IGKV14-100*01	IGKV17-121*01	IGKV14-100*01	IGKV17-121*01	IGKV17-121*01	IGKV14-100*01	IGKV4-70*01		IGKV9-124*01	IGKV17-121*01
	IGKV9-120*01	IGKV14-100*01	IGKV9-120*01	IGKV14-100*01	IGKV9-120*01	IGKV8-30*01	IGKV9-120*01 F	IGKV14-111*01 F	IGKV14-100*01	IGKV9-120*01	IGKV9-120*01	IGKV17-121*01	IGKV14-100*01	IGKV17-121*01	IGKV4-91*01	IGKV14-100*01	IGKV4-70*01		IGKV9-124*01	IGKV17-121*01
	IGKV9-120*01	IGKV14-100*01	IGKV9-120*01	IGKV14-100*01	IGKV9-120*01	IGKV8-30*01	IGKV9-120*01 F	IGKV9-120*01 F	IGKV14-100*01	IGKV9-120*01	IGKV14-100*01	IGKV17-121*01	IGKV14-100*01	IGKV17-121*01	IGKV17-121*01	IGKV14-100*01	IGKV4-70*01		IGKV9-124*01	IGKV17-121*01
	IGKV9-120*01	IGKV14-100*01	IGKV9-120*01	IGKV14-100*01	IGKV9-120*01	IGKV8-30*01	IGKV9-120*01 F	IGKV9-120*01 F	IGKV14-100*01	IGKV9-120*01	IGKV14-100*01	IGKV17-121*01	IGKV14-100*01	IGKV17-121*01	IGKV17-121*01	IGKV14-100*01	IGKV4-70*01		IGKV9-124*01	IGKV17-121*01
	IGKV9-120*01	IGKV14-100*01	IGKV9-120*01	IGKV14-100*01	IGKV9-120*01	IGKV8-30*01	IGKV9-120*01 F	IGKV4-59*01 F	IGKV14-100*01	IGKV9-120*01	IGKV14-100*01	IGKV17-121*01	IGKV14-100*01	IGKV17-121*01	IGKV17-121*01	IGKV14-100*01	IGKV4-70*01		IGKV9-124*01	IGKV17-121*01
	IGKV9-120*01	IGKV14-100*01	IGKV9-120*01	IGKV14-100*01	IGKV9-120*01	IGKV8-30*01	IGKV9-120*01 F	IGKV9-120*01 F	IGKV14-100*01	IGKV9-120*01	IGKV14-100*01	IGKV17-121*01	IGKV14-100*01	IGKV17-121*01	IGKV4-91*01	IGKV14-100*01	IGKV4-70*01		IGKV9-124*01	IGKV17-121*01
	IGKV9-120*01	IGKV14-100*01	IGKV9-120*01	IGKV14-100*01	IGKV9-120*01	IGKV9-120*01	IGKV9-120*01 F	IGKV9-120*01 F	IGKV14-100*01	IGKV9-120*01	IGKV14-100*01	IGKV17-121*01	IGKV14-100*01	IGKV17-121*01	IGKV17-121*01	IGKV14-100*01	IGKV4-70*01		IGKV9-124*01	IGKV17-121*01
	IGKV9-120*01	IGKV14-100*01	IGKV9-120*01	IGKV14-100*01	IGKV9-120*01	IGKV8-30*01	IGKV9-120*01 F	IGKV9-120*01 F	IGKV14-100*01	IGKV9-120*01	IGKV14-100*01	IGKV17-121*01	IGKV14-100*01	IGKV17-121*01	IGKV17-121*01	IGKV14-100*01	IGKV4-70*01		IGKV9-124*01	IGKV17-121*01
	IGKV9-120*01	IGKV14-100*01	IGKV9-120*01	IGKV14-100*01	IGKV9-120*01	IGKV9-120*01	IGKV9-120*01 F	IGKV9-120*01 F	IGKV14-100*01	IGKV9-120*01	IGKV9-120*01	IGKV17-121*01	IGKV14-100*01	IGKV17-121*01	IGKV4-91*01	IGKV14-100*01	IGKV4-70*01		IGKV9-124*01	IGKV17-121*01
	IGKV9-120*01	IGKV14-100*01	IGKV9-120*01	IGKV14-100*01	IGKV9-120*01	IGKV8-30*01	IGKV9-120*01 F	IGKV9-120*01 F	IGKV14-100*01	IGKV9-120*01	IGKV9-120*01	IGKV17-121*01	IGKV9-120*01	IGKV17-121*01	IGKV4-91*01	IGKV14-100*01	IGKV4-70*01		IGKV9-124*01	IGKV17-121*01
	IGKV9-120*01	IGKV14-100*01	IGKV9-120*01	IGKV14-100*01	IGKV9-120*01	IGKV8-30*01	IGKV9-120*01 F	IGKV9-120*01 F	IGKV14-100*01	IGKV9-120*01	IGKV9-120*01	IGKV17-121*01	IGKV14-100*01	IGKV17-121*01	IGKV4-91*01	IGKV14-100*01	IGKV4-70*01		IGKV9-124*01	IGKV17-121*01
	IGKV9-120*01	IGKV14-100*01	IGKV9-120*01	IGKV14-100*01	IGKV9-120*01	IGKV9-120*01	IGKV9-120*01 F	IGKV9-120*01 F	IGKV17-121*01	IGKV9-120*01	IGKV14-100*01	IGKV17-121*01	IGKV14-100*01	IGKV17-121*01	IGKV4-91*01	IGKV14-100*01	IGKV4-70*01		IGKV9-124*01	IGKV17-121*01
	IGKV9-120*01	IGKV14-100*01	IGKV9-120*01	IGKV14-100*01	IGKV9-120*01	IGKV9-120*01	IGKV9-120*01 F	IGKV9-120*01 F	IGKV14-100*01	IGKV9-120*01	IGKV9-120*01	IGKV17-121*01	IGKV9-120*01	IGKV17-121*01	IGKV4-91*01	IGKV14-100*01	IGKV4-70*01		IGKV9-124*01	IGKV17-121*01
	IGKV9-120*01	IGKV14-100*01	IGKV9-120*01	IGKV14-100*01	IGKV9-120*01	IGKV9-120*01	IGKV9-120*01 F	IGKV9-120*01 F	IGKV14-100*01	IGKV9-120*01	IGKV9-120*01	IGKV17-121*01	IGKV14-100*01	IGKV17-121*01	IGKV17-121*01	IGKV14-100*01	IGKV4-70*01		IGKV9-124*01	IGKV17-121*01
	IGKV9-120*01	IGKV14-100*01	IGKV9-120*01	IGKV14-100*01	IGKV9-120*01	IGKV8-30*01	IGKV9-120*01 F	IGKV9-120*01 F	IGKV14-100*01	IGKV9-120*01	IGKV14-100*01	IGKV17-121*01	IGKV9-120*01	IGKV17-121*01	IGKV17-121*01	IGKV14-100*01	IGKV4-70*01		IGKV9-124*01	IGKV17-121*01
	IGKV9-120*01	IGKV14-100*01	IGKV9-120*01	IGKV14-100*01	IGKV9-120*01	IGKV8-30*01	IGKV9-120*01 F	IGKV9-120*01 F	IGKV14-100*01	IGKV9-120*01	IGKV9-120*01	IGKV17-121*01	IGKV14-100*01	IGKV17-121*01	IGKV4-91*01	IGKV14-100*01	IGKV4-70*01		IGKV9-124*01	IGKV17-121*01
	IGKV9-120*01	IGKV14-100*01	IGKV9-120*01	IGKV14-100*01	IGKV9-120*01	IGKV8-30*01	IGKV9-120*01 F	IGKV14-111*01 F	IGKV14-100*01	IGKV9-120*01	IGKV9-120*01	IGKV17-121*01	IGKV14-100*01	IGKV17-121*01	IGKV4-91*01	IGKV14-100*01	IGKV4-70*01		IGKV9-124*01	IGKV17-121*01
	IGKV9-120*01	IGKV14-100*01	IGKV9-120*01	IGKV14-100*01	IGKV9-120*01	IGKV8-30*01	IGKV9-120*01 F	IGKV9-120*01 F	IGKV14-100*01	IGKV9-120*01	IGKV9-120*01	IGKV17-121*01	IGKV14-100*01	IGKV17-121*01	IGKV17-121*01	IGKV14-100*01	IGKV4-70*01		IGKV9-124*01	IGKV17-121*01
	IGKV9-120*01	IGKV14-100*01	IGKV9-120*01	IGKV14-100*01	IGKV9-120*01	IGKV8-30*01	IGKV9-120*01 F	IGKV9-120*01 F	IGKV17-121*01	IGKV9-120*01	IGKV9-120*01	IGKV17-121*01	IGKV14-100*01	IGKV17-121*01	IGKV17-121*01	IGKV14-100*01	IGKV4-70*01		IGKV9-124*01	IGKV17-121*01
	IGKV9-120*01	IGKV14-100*01	IGKV9-120*01	IGKV14-100*01	IGKV9-120*01	IGKV8-30*01	IGKV9-120*01 F	IGKV9-120*01 F	IGKV14-100*01	IGKV9-120*01	IGKV14-100*01	IGKV17-121*01	IGKV14-100*01	IGKV17-121*01	IGKV17-121*01	IGKV14-100*01	IGKV4-70*01		IGKV9-124*01	IGKV17-121*01
	IGKV9-120*01	IGKV14-100*01	IGKV9-120*01	IGKV14-100*01	IGKV9-120*01	IGKV8-30*01	IGKV9-120*01 F	IGKV9-120*01 F	IGKV14-100*01	IGKV9-120*01	IGKV14-100*01	IGKV17-121*01	IGKV14-100*01	IGKV17-121*01	IGKV17-121*01	IGKV14-100*01	IGKV4-70*01		IGKV9-124*01	IGKV17-121*01
	IGKV9-120*01	IGKV14-100*01	IGKV9-120*01	IGKV14-100*01	IGKV9-120*01	IGKV8-30*01	IGKV9-120*01 F	IGKV9-120*01 F	IGKV14-100*01	IGKV9-120*01	IGKV9-120*01	IGKV17-121*01	IGKV9-120*01	IGKV17-121*01	IGKV17-121*01	IGKV14-100*01	IGKV4-70*01		IGKV9-124*01	IGKV17-121*01
	IGKV9-120*01	IGKV14-100*01	IGKV9-120*01	IGKV14-100*01	IGKV9-120*01	IGKV9-120*01	IGKV9-120*01 F	IGKV9-120*01 F	IGKV14-100*01	IGKV3-4*01	IGKV9-120*01	IGKV17-121*01	IGKV9-120*01	IGKV17-121*01	IGKV4-91*01	IGKV14-100*01	IGKV4-70*01		IGKV9-124*01	IGKV17-121*01
	IGKV9-120*01	IGKV14-100*01	IGKV9-120*01	IGKV14-100*01	IGKV9-120*01	IGKV8-30*01	IGKV9-120*01 F	IGKV9-120*01 F	IGKV14-100*01	IGKV9-120*01	IGKV9-120*01	IGKV17-121*01	IGKV14-100*01	IGKV17-121*01	IGKV17-121*01	IGKV14-100*01	IGKV4-70*01		IGKV9-124*01	IGKV17-121*01
	IGKV9-120*01	IGKV14-100*01	IGKV9-120*01	IGKV14-100*01	IGKV9-120*01	IGKV8-30*01	IGKV9-120*01 F	IGKV9-120*01 F	IGKV14-100*01	IGKV9-120*01	IGKV14-100*01	IGKV17-121*01	IGKV14-100*01	IGKV17-121*01	IGKV4-91*01	IGKV14-100*01	IGKV4-70*01		IGKV9-124*01	IGKV17-121*01
	IGKV9-120*01	IGKV14-100*01	IGKV9-120*01	IGKV14-100*01	IGKV9-120*01	IGKV8-30*01	IGKV9-120*01 F	IGKV9-120*01 F	IGKV14-100*01	IGKV9-120*01	IGKV14-100*01	IGKV17-121*01	IGKV14-100*01	IGKV17-121*01	IGKV17-121*01	IGKV14-100*01	IGKV4-70*01		IGKV9-124*01	IGKV17-121*01
	IGKV9-120*01	IGKV14-100*01	IGKV9-120*01	IGKV14-100*01	IGKV9-120*01	IGKV8-30*01	IGKV9-120*01 F	IGKV9-120*01 F	IGKV14-100*01	IGKV9-120*01	IGKV9-120*01	IGKV17-121*01	IGKV14-100*01	IGKV17-121*01	IGKV4-91*01	IGKV14-100*01	IGKV4-70*01		IGKV9-124*01	IGKV17-121*01
	IGKV9-120*01	IGKV14-100*01	IGKV9-120*01	IGKV14-100*01	IGKV9-120*01	IGKV8-30*01	IGKV9-120*01 F	IGKV9-120*01 F	IGKV14-100*01	IGKV9-120*01	IGKV14-100*01	IGKV17-121*01	IGKV14-100*01	IGKV17-121*01	IGKV17-121*01	IGKV14-100*01	IGKV4-70*01		IGKV9-124*01	IGKV17-121*01
	IGKV9-120*01	IGKV14-100*01	IGKV9-120*01	IGKV14-100*01	IGKV9-120*01	IGKV8-30*01	IGKV9-120*01 F	IGKV9-120*01 F	IGKV14-100*01	IGKV9-120*01	IGKV14-100*01	IGKV17-121*01	IGKV14-100*01	IGKV17-121*01	IGKV17-121*01	IGKV14-100*01	IGKV4-70*01		IGKV9-124*01	IGKV17-121*01
	IGKV9-120*01	IGKV14-100*01	IGKV9-120*01	IGKV14-100*01	IGKV9-120*01	IGKV8-30*01	IGKV9-120*01 F	IGKV14-111*01 F	IGKV14-100*01	IGKV9-120*01	IGKV14-100*01	IGKV17-121*01	IGKV14-100*01	IGKV17-121*01	IGKV4-91*01	IGKV14-100*01	IGKV4-70*01		IGKV9-124*01	IGKV17-121*01
	IGKV9-120*01	IGKV14-100*01	IGKV9-120*01	IGKV14-100*01	IGKV9-120*01	IGKV8-30*01	IGKV9-120*01 F	IGKV9-120*01 F	IGKV14-100*01	IGKV9-120*01	IGKV14-100*01	IGKV17-121*01	IGKV14-100*01	IGKV17-121*01	IGKV17-121*01	IGKV14-100*01	IGKV4-70*01		IGKV9-124*01	IGKV17-121*01
	IGKV9-120*01	IGKV14-100*01	IGKV9-120*01	IGKV14-100*01	IGKV9-120*01	IGKV9-120*01	IGKV9-120*01 F	IGKV9-120*01 F	IGKV14-100*01	IGKV9-120*01	IGKV14-100*01	IGKV17-121*01	IGKV14-100*01	IGKV17-121*01	IGKV17-121*01	IGKV14-100*01	IGKV4-70*01		IGKV9-124*01	IGKV17-121*01
	IGKV9-120*01	IGKV14-100*01	IGKV9-120*01	IGKV14-100*01	IGKV9-120*01	IGKV9-120*01	IGKV9-120*01 F	IGKV14-111*01 F	IGKV14-100*01	IGKV9-120*01	IGKV14-100*01	IGKV17-121*01	IGKV14-100*01	IGKV17-121*01	IGKV17-121*01	IGKV14-100*01	IGKV4-70*01		IGKV9-124*01	IGKV17-121*01
	IGKV9-120*01	IGKV14-100*01	IGKV9-120*01	IGKV14-100*01	IGKV9-120*01	IGKV8-30*01	IGKV9-120*01 F	IGKV9-120*01 F	IGKV14-100*01	IGKV9-120*01	IGKV14-100*01	IGKV17-121*01	IGKV9-120*01	IGKV17-121*01	IGKV17-121*01	IGKV14-100*01	IGKV4-70*01		IGKV9-124*01	IGKV17-121*01
	IGKV9-120*01	IGKV14-100*01	IGKV9-120*01	IGKV14-100*01	IGKV9-120*01	IGKV9-120*01	IGKV9-120*01 F	IGKV9-120*01 F	IGKV14-100*01	IGKV9-120*01	IGKV14-100*01	IGKV17-121*01	IGKV14-100*01	IGKV17-121*01	IGKV17-121*01	IGKV14-100*01	IGKV4-70*01		IGKV9-124*01	IGKV4-68*01
	IGKV9-120*01	IGKV14-100*01	IGKV9-120*01	IGKV14-100*01	IGKV9-120*01	IGKV8-30*01	IGKV9-120*01 F	IGKV9-120*01 F	IGKV14-100*01	IGKV9-120*01	IGKV14-100*01	IGKV17-121*01	IGKV9-120*01	IGKV17-121*01	IGKV17-121*01	IGKV14-100*01	IGKV4-70*01		IGKV9-124*01	IGKV17-121*01
	IGKV9-120*01	IGKV14-100*01	IGKV9-120*01	IGKV14-100*01	IGKV9-120*01	IGKV8-30*01	IGKV9-120*01 F	IGKV9-120*01 F	IGKV14-100*01	IGKV9-120*01	IGKV14-100*01	IGKV17-121*01	IGKV14-100*01	IGKV17-121*01	IGKV17-121*01	IGKV14-100*01	IGKV4-70*01		IGKV9-124*01	IGKV17-121*01
	IGKV9-120*01	IGKV14-100*01	IGKV9-120*01	IGKV14-100*01	IGKV9-120*01	IGKV9-120*01	IGKV9-120*01 F	IGKV1-135*01 F	IGKV14-100*01	IGKV9-120*01	IGKV9-120*01	IGKV17-121*01	IGKV14-100*01	IGKV17-121*01	IGKV17-121*01	IGKV14-100*01	IGKV4-70*01		IGKV9-124*01	IGKV17-121*01
	IGKV9-120*01	IGKV14-100*01	IGKV9-120*01	IGKV14-100*01	IGKV9-120*01	IGKV9-120*01	IGKV9-120*01 F	IGKV9-120*01 F	IGKV17-121*01	IGKV9-120*01	IGKV9-120*01	IGKV17-121*01	IGKV14-100*01	IGKV17-121*01	IGKV17-121*01	IGKV14-100*01	IGKV4-70*01		IGKV9-124*01	IGKV17-121*01
	IGKV9-120*01	IGKV14-100*01	IGKV9-120*01	IGKV14-100*01	IGKV9-120*01	IGKV8-30*01	IGKV9-120*01 F	IGKV14-111*01 F	IGKV14-100*01	IGKV9-120*01	IGKV9-120*01	IGKV17-121*01	IGKV9-120*01	IGKV17-121*01	IGKV4-91*01	IGKV14-100*01	IGKV4-70*01		IGKV9-124*01	IGKV17-121*01
	IGKV9-120*01	IGKV14-100*01	IGKV9-120*01	IGKV14-100*01	IGKV9-120*01	IGKV8-30*01	IGKV9-120*01 F	IGKV9-120*01 F	IGKV14-100*01	IGKV9-120*01	IGKV14-100*01	IGKV17-121*01	IGKV14-100*01	IGKV17-121*01	IGKV4-91*01	IGKV14-100*01	IGKV4-70*01		IGKV9-124*01	IGKV17-121*01
	IGKV9-120*01	IGKV14-100*01	IGKV9-120*01	IGKV14-100*01	IGKV9-120*01	IGKV8-30*01	IGKV9-120*01 F	IGKV9-120*01 F	IGKV14-100*01	IGKV9-120*01	IGKV14-100*01	IGKV17-121*01	IGKV14-100*01	IGKV17-121*01	IGKV4-91*01	IGKV14-100*01	IGKV4-70*01		IGKV9-124*01	IGKV17-121*01
	IGKV9-120*01	IGKV14-100*01	IGKV9-120*01	IGKV14-100*01	IGKV9-120*01	IGKV8-30*01	IGKV9-120*01 F	IGKV14-111*01 F	IGKV14-100*01	IGKV9-120*01	IGKV9-120*01	IGKV17-121*01	IGKV14-100*01	IGKV17-121*01	IGKV17-121*01	IGKV14-100*01	IGKV4-70*01		IGKV9-124*01	IGKV17-121*01
	IGKV9-120*01	IGKV14-100*01	IGKV9-120*01	IGKV14-100*01	IGKV9-120*01	IGKV8-30*01	IGKV9-120*01 F	IGKV9-120*01 F	IGKV14-100*01	IGKV9-120*01	IGKV14-100*01	IGKV17-121*01	IGKV9-120*01	IGKV17-121*01	IGKV17-121*01	IGKV14-100*01	IGKV4-70*01		IGKV9-124*01	IGKV17-121*01
	IGKV9-120*01	IGKV14-100*01	IGKV9-120*01	IGKV14-100*01	IGKV9-120*01	IGKV8-30*01	IGKV9-120*01 F	IGKV9-120*01 F	IGKV14-100*01	IGKV9-120*01	IGKV9-120*01	IGKV17-121*01	IGKV14-100*01	IGKV17-121*01	IGKV17-121*01	IGKV14-100*01	IGKV4-70*01		IGKV9-124*01	IGKV17-121*01
	IGKV9-120*01	IGKV14-100*01	IGKV9-120*01	IGKV14-100*01	IGKV9-120*01	IGKV8-30*01	IGKV9-120*01 F	IGKV9-120*01 F	IGKV14-100*01	IGKV9-120*01	IGKV9-120*01	IGKV17-121*01	IGKV14-100*01	IGKV17-121*01	IGKV17-121*01	IGKV14-100*01	IGKV4-70*01		IGKV9-124*01	IGKV17-121*01
	IGKV9-120*01	IGKV14-100*01	IGKV9-120*01	IGKV14-100*01	IGKV9-120*01	IGKV9-120*01	IGKV9-120*01 F	IGKV9-120*01 F	IGKV14-100*01	IGKV14-100*01	IGKV14-100*01	IGKV17-121*01	IGKV14-100*01	IGKV17-121*01	IGKV17-121*01	IGKV14-100*01	IGKV4-70*01		IGKV9-124*01	IGKV17-121*01
	IGKV9-120*01	IGKV14-100*01	IGKV9-120*01	IGKV14-100*01	IGKV9-120*01	IGKV8-30*01	IGKV9-120*01 F	IGKV14-111*01 F	IGKV14-100*01	IGKV9-120*01	IGKV14-100*01	IGKV17-121*01	IGKV14-100*01	IGKV17-121*01	IGKV4-91*01	IGKV14-100*01	IGKV4-70*01		IGKV9-124*01	IGKV17-121*01
	IGKV9-120*01	IGKV14-100*01	IGKV9-120*01	IGKV14-100*01	IGKV9-120*01	IGKV8-30*01	IGKV9-120*01 F	IGKV9-120*01 F	IGKV17-121*01	IGKV9-120*01	IGKV9-120*01	IGKV17-121*01	IGKV14-100*01	IGKV17-121*01	IGKV4-91*01	IGKV14-100*01	IGKV4-70*01		IGKV9-124*01	IGKV17-121*01
	IGKV9-120*01	IGKV14-100*01	IGKV9-120*01	IGKV14-100*01	IGKV9-120*01	IGKV9-120*01	IGKV9-120*01 F	IGKV9-120*01 F	IGKV14-100*01	IGKV9-120*01	IGKV9-120*01	IGKV17-121*01	IGKV14-100*01	IGKV17-121*01	IGKV17-121*01	IGKV14-100*01	IGKV4-70*01		IGKV9-124*01	IGKV17-121*01
	IGKV9-120*01	IGKV14-100*01	IGKV9-120*01	IGKV14-100*01	IGKV9-120*01	IGKV8-30*01	IGKV9-120*01 F	IGKV9-120*01 F	IGKV14-100*01	IGKV9-120*01	IGKV14-100*01	IGKV17-121*01	IGKV14-100*01	IGKV17-121*01	IGKV17-121*01	IGKV14-100*01	IGKV4-70*01		IGKV9-124*01	IGKV17-121*01
	IGKV9-120*01	IGKV14-100*01	IGKV9-120*01	IGKV14-100*01	IGKV9-120*01	IGKV8-30*01	IGKV9-120*01 F	IGKV9-120*01 F	IGKV14-100*01	IGKV9-120*01	IGKV14-100*01	IGKV17-121*01	IGKV14-100*01	IGKV17-121*01	IGKV17-121*01	IGKV14-100*01	IGKV4-70*01		IGKV9-124*01	IGKV17-121*01
	IGKV9-120*01	IGKV14-100*01	IGKV9-120*01	IGKV14-100*01	IGKV9-120*01	IGKV9-120*01	IGKV9-120*01 F	IGKV9-120*01 F	IGKV14-100*01	IGKV9-120*01	IGKV9-120*01	IGKV17-121*01	IGKV14-100*01	IGKV17-121*01	IGKV17-121*01	IGKV14-100*01	IGKV4-70*01		IGKV9-124*01	IGKV17-121*01
	IGKV9-120*01	IGKV14-100*01	IGKV9-120*01	IGKV14-100*01	IGKV9-120*01	IGKV8-30*01	IGKV9-120*01 F	IGKV9-120*01 F	IGKV14-100*01	IGKV9-120*01	IGKV14-100*01	IGKV17-121*01	IGKV14-100*01	IGKV17-121*01	IGKV17-121*01	IGKV14-100*01	IGKV4-70*01		IGKV9-124*01	IGKV17-121*01
	IGKV9-120*01	IGKV14-100*01	IGKV9-120*01	IGKV14-100*01	IGKV9-120*01	IGKV8-30*01	IGKV9-120*01 F	IGKV9-120*01 F	IGKV14-100*01	IGKV9-120*01	IGKV14-100*01	IGKV17-121*01	IGKV14-100*01	IGKV17-121*01	IGKV17-121*01	IGKV14-100*01	IGKV4-70*01		IGKV9-124*01	IGKV17-121*01
	IGKV9-120*01	IGKV14-100*01	IGKV9-120*01	IGKV14-100*01	IGKV9-120*01	IGKV9-120*01	IGKV9-120*01 F	IGKV9-120*01 F	IGKV14-100*01	IGKV9-120*01	IGKV9-120*01	IGKV17-121*01	IGKV14-100*01	IGKV17-121*01	IGKV17-121*01	IGKV14-100*01	IGKV4-70*01		IGKV9-124*01	IGKV17-121*01
	IGKV9-120*01	IGKV14-100*01	IGKV9-120*01	IGKV14-100*01	IGKV9-120*01	IGKV8-30*01	IGKV9-120*01 F	IGKV9-120*01 F	IGKV14-100*01	IGKV9-120*01	IGKV9-120*01	IGKV17-121*01	IGKV14-100*01	IGKV17-121*01	IGKV17-121*01	IGKV14-100*01	IGKV4-70*01		IGKV9-124*01	IGKV17-121*01
	IGKV9-120*01	IGKV14-100*01	IGKV9-120*01	IGKV14-100*01	IGKV9-120*01	IGKV8-30*01	IGKV9-120*01 F	IGKV17-121*01 F	IGKV14-100*01	IGKV9-120*01	IGKV9-120*01	IGKV17-121*01	IGKV14-100*01	IGKV17-121*01	IGKV17-121*01	IGKV14-100*01	IGKV4-70*01		IGKV9-124*01	IGKV17-121*01
	IGKV9-120*01	IGKV14-100*01	IGKV9-120*01	IGKV14-100*01	IGKV9-120*01	IGKV8-30*01	IGKV9-120*01 F	IGKV9-120*01 F	IGKV14-100*01	IGKV9-120*01	IGKV14-100*01	IGKV17-121*01	IGKV14-100*01	IGKV17-121*01	IGKV17-121*01	IGKV14-100*01	IGKV4-70*01		IGKV9-124*01	IGKV17-121*01
	IGKV9-120*01	IGKV14-100*01	IGKV9-120*01	IGKV14-100*01	IGKV9-120*01	IGKV8-30*01	IGKV9-120*01 F	IGKV1-135*01 F	IGKV14-100*01	IGKV9-120*01	IGKV9-120*01	IGKV17-121*01	IGKV14-100*01	IGKV17-121*01	IGKV17-121*01	IGKV14-100*01	IGKV4-70*01		IGKV9-124*01	IGKV17-121*01
	IGKV9-120*01	IGKV14-100*01	IGKV9-120*01	IGKV14-100*01	IGKV9-120*01	IGKV8-30*01	IGKV9-120*01 F	IGKV9-120*01 F	IGKV14-100*01	IGKV9-120*01	IGKV9-120*01	IGKV17-121*01	IGKV9-120*01	IGKV17-121*01	IGKV17-121*01	IGKV14-100*01	IGKV4-70*01		IGKV9-124*01	IGKV17-121*01
	IGKV9-120*01	IGKV14-100*01	IGKV9-120*01	IGKV14-100*01	IGKV9-120*01	IGKV9-120*01	IGKV9-120*01 F	IGKV14-111*01 F	IGKV14-100*01	IGKV9-120*01	IGKV9-120*01	IGKV17-121*01	IGKV9-120*01	IGKV17-121*01	IGKV17-121*01	IGKV14-100*01	IGKV4-70*01		IGKV9-124*01	IGKV17-121*01
	IGKV9-120*01	IGKV14-100*01	IGKV9-120*01	IGKV14-100*01	IGKV9-120*01	IGKV9-120*01	IGKV9-120*01 F	IGKV9-120*01 F	IGKV14-100*01	IGKV9-120*01	IGKV14-100*01	IGKV17-121*01	IGKV14-100*01	IGKV17-121*01	IGKV17-121*01	IGKV14-100*01	IGKV4-70*01		IGKV9-124*01	IGKV17-121*01
	IGKV9-120*01	IGKV14-100*01	IGKV9-120*01	IGKV14-100*01	IGKV9-120*01	IGKV8-30*01	IGKV9-120*01 F	IGKV14-111*01 F	IGKV14-100*01	IGKV9-120*01	IGKV14-100*01	IGKV17-121*01	IGKV14-100*01	IGKV17-121*01	IGKV17-121*01	IGKV14-100*01	IGKV4-70*01		IGKV9-124*01	IGKV17-121*01
	IGKV9-120*01	IGKV14-100*01	IGKV9-120*01	IGKV14-100*01	IGKV9-120*01	IGKV9-120*01	IGKV9-120*01 F	IGKV9-120*01 F	IGKV8-24*01	IGKV9-120*01	IGKV14-100*01	IGKV17-121*01	IGKV14-100*01	IGKV17-121*01	IGKV17-121*01	IGKV14-100*01	IGKV4-70*01		IGKV9-124*01	IGKV17-121*01
	IGKV9-120*01	IGKV14-100*01	IGKV9-120*01	IGKV14-100*01	IGKV9-120*01	IGKV8-30*01	IGKV9-120*01 F	IGKV9-120*01 F	IGKV1-135*01	IGKV9-120*01	IGKV9-120*01	IGKV17-121*01	IGKV14-100*01	IGKV17-121*01	IGKV17-121*01	IGKV14-100*01	IGKV4-70*01		IGKV9-124*01	IGKV17-121*01
	IGKV9-120*01	IGKV14-100*01	IGKV9-120*01	IGKV14-100*01	IGKV9-120*01	IGKV8-30*01	IGKV9-120*01 F	IGKV9-120*01 F	IGKV14-100*01	IGKV9-120*01	IGKV9-120*01	IGKV17-121*01	IGKV14-100*01	IGKV17-121*01	IGKV17-121*01	IGKV14-100*01	IGKV4-70*01		IGKV9-124*01	IGKV17-121*01
	IGKV9-120*01	IGKV14-100*01	IGKV9-120*01	IGKV14-100*01	IGKV9-120*01	IGKV9-120*01	IGKV9-120*01 F	IGKV9-120*01 F	IGKV14-100*01	IGKV9-120*01	IGKV9-120*01	IGKV17-121*01	IGKV9-120*01	IGKV17-121*01	IGKV17-121*01	IGKV14-100*01	IGKV4-70*01		IGKV9-124*01	IGKV17-121*01
	IGKV9-120*01	IGKV14-100*01	IGKV9-120*01	IGKV14-100*01	IGKV9-120*01	IGKV8-30*01	IGKV9-120*01 F	IGKV9-120*01 F	IGKV14-100*01	IGKV9-120*01	IGKV14-100*01	IGKV17-121*01	IGKV14-100*01	IGKV17-121*01	IGKV17-121*01	IGKV14-100*01	IGKV4-70*01		IGKV9-124*01	IGKV17-121*01
	IGKV9-120*01	IGKV14-100*01	IGKV9-120*01	IGKV14-100*01	IGKV9-120*01	IGKV9-120*01	IGKV9-120*01 F	IGKV9-120*01 F	IGKV14-100*01	IGKV9-120*01	IGKV9-120*01	IGKV17-121*01	IGKV14-100*01	IGKV17-121*01	IGKV17-121*01	IGKV14-100*01	IGKV4-70*01		IGKV9-124*01	IGKV17-121*01
	IGKV9-120*01	IGKV14-100*01	IGKV9-120*01	IGKV14-100*01	IGKV9-120*01	IGKV8-30*01	IGKV9-120*01 F	IGKV9-120*01 F	IGKV14-100*01	IGKV9-120*01	IGKV14-100*01	IGKV17-121*01	IGKV14-100*01	IGKV17-121*01	IGKV17-121*01	IGKV14-100*01	IGKV4-70*01		IGKV9-124*01	IGKV4-68*01
	IGKV9-120*01	IGKV14-100*01	IGKV9-120*01	IGKV14-100*01	IGKV9-120*01	IGKV8-30*01	IGKV9-120*01 F	IGKV9-120*01 F	IGKV14-100*01	IGKV9-120*01	IGKV14-100*01	IGKV17-121*01	IGKV14-100*01	IGKV17-121*01	IGKV4-91*01	IGKV14-100*01	IGKV4-70*01		IGKV9-124*01	IGKV17-121*01
	IGKV9-120*01	IGKV14-100*01	IGKV9-120*01	IGKV14-100*01	IGKV9-120*01	IGKV8-30*01	IGKV9-120*01 F	IGKV9-120*01 F	IGKV1-135*01	IGKV9-120*01	IGKV14-100*01	IGKV17-121*01	IGKV14-100*01	IGKV17-121*01	IGKV17-121*01	IGKV14-100*01	IGKV4-70*01		IGKV9-124*01	IGKV17-121*01
	IGKV9-120*01	IGKV14-100*01	IGKV9-120*01	IGKV14-100*01	IGKV9-120*01	IGKV8-30*01	IGKV9-120*01 F	IGKV9-120*01 F	IGKV14-100*01	IGKV9-120*01	IGKV14-100*01	IGKV17-121*01	IGKV14-100*01	IGKV17-121*01	IGKV4-91*01	IGKV14-100*01	IGKV4-70*01		IGKV9-124*01	IGKV17-121*01
	IGKV9-120*01	IGKV14-100*01	IGKV9-120*01	IGKV14-100*01	IGKV9-120*01	IGKV9-120*01	IGKV9-120*01 F	IGKV14-111*01 F	IGKV14-100*01	IGKV9-120*01	IGKV14-100*01	IGKV17-121*01	IGKV14-100*01	IGKV17-121*01	IGKV17-121*01	IGKV14-100*01	IGKV4-70*01		IGKV9-124*01	IGKV17-121*01
	IGKV9-120*01	IGKV14-100*01	IGKV9-120*01	IGKV14-100*01	IGKV9-120*01	IGKV9-120*01	IGKV9-120*01 F	IGKV9-120*01 F	IGKV14-100*01	IGKV9-120*01	IGKV14-100*01	IGKV17-121*01	IGKV14-100*01	IGKV17-121*01	IGKV4-91*01	IGKV14-100*01	IGKV4-70*01		IGKV9-124*01	IGKV17-121*01
	IGKV9-120*01	IGKV14-100*01	IGKV9-120*01	IGKV14-100*01	IGKV9-120*01	IGKV8-30*01	IGKV9-120*01 F	IGKV9-120*01 F	IGKV14-100*01	IGKV9-120*01	IGKV14-100*01	IGKV17-121*01	IGKV14-100*01	IGKV17-121*01	IGKV4-91*01	IGKV14-100*01	IGKV4-70*01		IGKV9-124*01	IGKV17-121*01
	IGKV9-120*01	IGKV14-100*01	IGKV9-120*01	IGKV14-100*01	IGKV9-120*01	IGKV8-30*01	IGKV9-120*01 F	IGKV9-120*01 F	IGKV14-100*01	IGKV9-120*01	IGKV14-100*01	IGKV17-121*01	IGKV14-100*01	IGKV17-121*01	IGKV17-121*01	IGKV14-100*01	IGKV4-70*01		IGKV9-124*01	IGKV17-121*01
	IGKV9-120*01	IGKV14-100*01	IGKV9-120*01	IGKV14-100*01	IGKV9-120*01	IGKV9-120*01	IGKV9-120*01 F	IGKV9-120*01 F	IGKV14-100*01	IGKV9-120*01	IGKV9-120*01	IGKV17-121*01	IGKV14-100*01	IGKV17-121*01	IGKV17-121*01	IGKV14-100*01	IGKV4-70*01		IGKV9-124*01	IGKV17-121*01
	IGKV9-120*01	IGKV14-100*01	IGKV9-120*01	IGKV14-100*01	IGKV9-120*01	IGKV9-120*01	IGKV9-120*01 F	IGKV14-111*01 F	IGKV14-100*01	IGKV9-120*01	IGKV14-100*01	IGKV17-121*01	IGKV14-100*01	IGKV17-121*01	IGKV17-121*01	IGKV14-100*01	IGKV4-70*01		IGKV9-124*01	IGKV17-121*01
	IGKV9-120*01	IGKV14-100*01	IGKV9-120*01	IGKV14-100*01	IGKV9-120*01	IGKV8-30*01	IGKV9-120*01 F	IGKV14-111*01 F	IGKV14-100*01	IGKV9-120*01	IGKV9-120*01	IGKV17-121*01	IGKV14-100*01	IGKV17-121*01	IGKV17-121*01	IGKV14-100*01	IGKV4-70*01		IGKV9-124*01	IGKV17-121*01
	IGKV9-120*01	IGKV14-100*01	IGKV9-120*01	IGKV14-100*01	IGKV9-120*01	IGKV8-30*01	IGKV9-120*01 F	IGKV9-120*01 F	IGKV14-100*01	IGKV9-120*01	IGKV9-120*01	IGKV17-121*01	IGKV14-100*01	IGKV17-121*01	IGKV17-121*01	IGKV14-100*01	IGKV4-70*01		IGKV9-124*01	IGKV17-121*01
	IGKV9-120*01	IGKV14-100*01	IGKV9-120*01	IGKV14-100*01	IGKV9-120*01	IGKV8-30*01	IGKV9-120*01 F	IGKV9-120*01 F	IGKV14-100*01	IGKV9-120*01	IGKV9-120*01	IGKV17-121*01	IGKV14-100*01	IGKV17-121*01	IGKV17-121*01	IGKV14-100*01	IGKV4-70*01		IGKV9-124*01	IGKV17-121*01
	IGKV9-120*01	IGKV14-100*01	IGKV9-120*01	IGKV14-100*01	IGKV9-120*01	IGKV8-30*01	IGKV9-120*01 F	IGKV9-120*01 F	IGKV14-100*01	IGKV9-120*01	IGKV14-100*01	IGKV17-121*01	IGKV14-100*01	IGKV17-121*01	IGKV17-121*01	IGKV14-100*01	IGKV4-70*01		IGKV9-124*01	IGKV17-121*01
	IGKV9-120*01	IGKV14-100*01	IGKV9-120*01	IGKV14-100*01	IGKV9-120*01	IGKV8-30*01	IGKV9-120*01 F	IGKV9-120*01 F	IGKV14-100*01	IGKV9-120*01	IGKV14-100*01	IGKV17-121*01	IGKV9-120*01	IGKV17-121*01	IGKV17-121*01	IGKV14-100*01	IGKV4-70*01		IGKV9-124*01	IGKV17-121*01
	IGKV9-120*01	IGKV14-100*01	IGKV9-120*01	IGKV14-100*01	IGKV9-120*01	IGKV9-120*01	IGKV9-120*01 F	IGKV14-111*01 F	IGKV1-135*01	IGKV9-120*01	IGKV9-120*01	IGKV17-121*01	IGKV14-100*01	IGKV17-121*01	IGKV17-121*01	IGKV14-100*01	IGKV4-70*01		IGKV9-124*01	IGKV17-121*01
	IGKV9-120*01	IGKV14-100*01	IGKV9-120*01	IGKV14-100*01	IGKV9-120*01	IGKV9-120*01	IGKV9-120*01 F	IGKV9-120*01 F	IGKV14-100*01	IGKV9-120*01	IGKV9-120*01	IGKV17-121*01	IGKV14-100*01	IGKV17-121*01	IGKV17-121*01	IGKV14-100*01	IGKV4-70*01		IGKV9-124*01	IGKV17-121*01
	IGKV9-120*01	IGKV14-100*01	IGKV9-120*01	IGKV14-100*01	IGKV9-120*01	IGKV8-30*01	IGKV9-120*01 F	IGKV9-120*01 F	IGKV17-121*01	IGKV9-120*01	IGKV14-100*01	IGKV17-121*01	IGKV9-120*01	IGKV17-121*01	IGKV4-91*01	IGKV14-100*01	IGKV4-70*01		IGKV9-124*01	IGKV17-121*01
	IGKV9-120*01	IGKV14-100*01	IGKV9-120*01	IGKV14-100*01	IGKV9-120*01	IGKV8-30*01	IGKV9-120*01 F	IGKV14-111*01 F	IGKV17-121*01	IGKV9-120*01	IGKV14-100*01	IGKV17-121*01	IGKV14-100*01	IGKV17-121*01	IGKV17-121*01	IGKV14-100*01	IGKV4-70*01		IGKV9-124*01	IGKV17-121*01
	IGKV9-120*01	IGKV14-100*01	IGKV9-120*01	IGKV14-100*01	IGKV9-120*01	IGKV8-30*01	IGKV9-120*01 F	IGKV9-120*01 F	IGKV14-100*01	IGKV9-120*01	IGKV14-100*01	IGKV17-121*01	IGKV14-100*01	IGKV17-121*01	IGKV17-121*01	IGKV14-100*01	IGKV4-70*01		IGKV9-124*01	IGKV17-121*01
	IGKV9-120*01	IGKV14-100*01	IGKV9-120*01	IGKV14-100*01	IGKV9-120*01	IGKV8-30*01	IGKV9-120*01 F	IGKV9-120*01 F	IGKV14-100*01	IGKV9-120*01	IGKV14-100*01	IGKV17-121*01	IGKV14-100*01	IGKV17-121*01	IGKV17-121*01	IGKV14-100*01	IGKV4-70*01		IGKV9-124*01	IGKV17-121*01
	IGKV9-120*01	IGKV14-100*01	IGKV9-120*01	IGKV14-100*01	IGKV9-120*01	IGKV8-30*01	IGKV9-120*01 F	IGKV9-120*01 F	IGKV14-100*01	IGKV9-120*01	IGKV14-100*01	IGKV17-121*01	IGKV14-100*01	IGKV17-121*01	IGKV17-121*01	IGKV14-100*01	IGKV4-70*01		IGKV9-124*01	IGKV17-121*01
	IGKV9-120*01	IGKV14-100*01	IGKV9-120*01	IGKV14-100*01	IGKV9-120*01	IGKV8-30*01	IGKV9-120*01 F	IGKV9-120*01 F	IGKV14-100*01	IGKV9-120*01	IGKV9-120*01	IGKV17-121*01	IGKV14-100*01	IGKV17-121*01	IGKV4-91*01	IGKV14-100*01	IGKV4-70*01		IGKV9-124*01	IGKV17-121*01
	IGKV9-120*01	IGKV14-100*01	IGKV9-120*01	IGKV14-100*01	IGKV9-120*01	IGKV8-30*01	IGKV9-120*01 F	IGKV14-111*01 F	IGKV14-100*01	IGKV9-120*01	IGKV14-100*01	IGKV17-121*01	IGKV14-100*01	IGKV17-121*01	IGKV17-121*01	IGKV14-100*01	IGKV4-70*01		IGKV9-124*01	IGKV17-121*01
	IGKV9-120*01	IGKV14-100*01	IGKV9-120*01	IGKV14-100*01	IGKV9-120*01	IGKV8-30*01	IGKV9-120*01 F	IGKV9-120*01 F	IGKV14-100*01	IGKV9-120*01	IGKV14-100*01	IGKV17-121*01	IGKV14-100*01	IGKV17-121*01	IGKV17-121*01	IGKV14-100*01	IGKV4-70*01		IGKV9-124*01	IGKV17-121*01
	IGKV9-120*01	IGKV14-100*01	IGKV9-120*01	IGKV14-100*01	IGKV9-120*01	IGKV8-30*01	IGKV9-120*01 F	IGKV14-111*01 F	IGKV14-100*01	IGKV9-120*01	IGKV14-100*01	IGKV17-121*01	IGKV14-100*01	IGKV17-121*01	IGKV17-121*01	IGKV14-100*01	IGKV4-70*01		IGKV9-124*01	IGKV17-121*01
	IGKV9-120*01	IGKV14-100*01	IGKV9-120*01	IGKV14-100*01	IGKV9-120*01	IGKV8-30*01	IGKV9-120*01 F	IGKV9-120*01 F	IGKV14-100*01	IGKV9-120*01	IGKV14-100*01	IGKV17-121*01	IGKV14-100*01	IGKV17-121*01	IGKV17-121*01	IGKV14-100*01	IGKV4-70*01		IGKV9-124*01	IGKV17-121*01
	IGKV9-120*01	IGKV14-100*01	IGKV9-120*01	IGKV14-100*01	IGKV9-120*01	IGKV9-120*01	IGKV9-120*01 F	IGKV9-120*01 F	IGKV14-100*01	IGKV9-120*01	IGKV14-100*01	IGKV17-121*01	IGKV14-100*01	IGKV17-121*01	IGKV4-91*01	IGKV14-100*01	IGKV4-70*01		IGKV9-124*01	IGKV17-121*01
	IGKV9-120*01	IGKV14-100*01	IGKV9-120*01	IGKV14-100*01	IGKV9-120*01	IGKV8-30*01	IGKV9-120*01 F	IGKV14-111*01 F	IGKV14-100*01	IGKV9-120*01	IGKV14-100*01	IGKV17-121*01	IGKV14-100*01	IGKV17-121*01	IGKV4-91*01	IGKV14-100*01	IGKV4-70*01		IGKV9-124*01	IGKV17-121*01
	IGKV9-120*01	IGKV14-100*01	IGKV9-120*01	IGKV14-100*01	IGKV9-120*01	IGKV9-120*01	IGKV9-120*01 F	IGKV14-111*01 F	IGKV14-100*01	IGKV9-120*01	IGKV9-120*01	IGKV17-121*01	IGKV14-100*01	IGKV17-121*01	IGKV4-91*01	IGKV14-100*01	IGKV4-70*01		IGKV9-124*01	IGKV17-121*01
	IGKV9-120*01	IGKV14-100*01	IGKV9-120*01	IGKV14-100*01	IGKV9-120*01	IGKV9-120*01	IGKV9-120*01 F	IGKV9-120*01 F	IGKV14-100*01	IGKV9-120*01	IGKV9-120*01	IGKV17-121*01	IGKV9-120*01	IGKV17-121*01	IGKV17-121*01	IGKV14-100*01	IGKV4-70*01		IGKV9-124*01	IGKV17-121*01
	IGKV9-120*01	IGKV14-100*01	IGKV9-120*01	IGKV14-100*01	IGKV9-120*01	IGKV8-30*01	IGKV9-120*01 F	IGKV14-111*01 F	IGKV14-100*01	IGKV9-120*01	IGKV14-100*01	IGKV17-121*01	IGKV9-120*01	IGKV17-121*01	IGKV17-121*01	IGKV14-100*01	IGKV4-70*01		IGKV9-124*01	IGKV17-121*01
	IGKV9-120*01	IGKV14-100*01	IGKV9-120*01	IGKV14-100*01	IGKV9-120*01	IGKV8-30*01	IGKV9-120*01 F	IGKV9-120*01 F	IGKV9-120*01	IGKV9-120*01	IGKV14-100*01	IGKV17-121*01	IGKV14-100*01	IGKV17-121*01	IGKV17-121*01	IGKV14-100*01	IGKV4-70*01		IGKV9-124*01	IGKV17-121*01
	IGKV9-120*01	IGKV14-100*01	IGKV9-120*01	IGKV14-100*01	IGKV9-120*01	IGKV8-30*01	IGKV9-120*01 F	IGKV9-120*01 F	IGKV14-100*01	IGKV9-120*01	IGKV14-100*01	IGKV17-121*01	IGKV14-100*01	IGKV17-121*01	IGKV4-91*01	IGKV14-100*01	IGKV4-70*01		IGKV9-124*01	IGKV17-121*01
	IGKV9-120*01	IGKV14-100*01	IGKV9-120*01	IGKV14-100*01	IGKV9-120*01	IGKV9-120*01	IGKV9-120*01 F	IGKV9-120*01 F	IGKV14-100*01	IGKV9-120*01	IGKV9-120*01	IGKV17-121*01	IGKV14-100*01	IGKV17-121*01	IGKV17-121*01	IGKV14-100*01	IGKV4-70*01		IGKV9-124*01	IGKV17-121*01
	IGKV9-120*01	IGKV14-100*01	IGKV9-120*01	IGKV14-100*01	IGKV9-120*01	IGKV8-30*01	IGKV9-120*01 F	IGKV14-111*01 F	IGKV14-100*01	IGKV9-120*01	IGKV14-100*01	IGKV17-121*01	IGKV14-100*01	IGKV17-121*01	IGKV17-121*01	IGKV14-100*01	IGKV4-70*01		IGKV9-124*01	IGKV17-121*01
	IGKV9-120*01	IGKV14-100*01	IGKV9-120*01	IGKV14-100*01	IGKV9-120*01	IGKV8-30*01	IGKV9-120*01 F	IGKV9-120*01 F	IGKV14-100*01	IGKV9-120*01	IGKV14-100*01	IGKV17-121*01	IGKV14-100*01	IGKV17-121*01	IGKV17-121*01	IGKV14-100*01	IGKV4-70*01		IGKV9-124*01	IGKV17-121*01
	IGKV9-120*01	IGKV14-100*01	IGKV9-120*01	IGKV14-100*01	IGKV9-120*01	IGKV8-30*01	IGKV9-120*01 F	IGKV9-120*01 F	IGKV14-100*01	IGKV9-120*01	IGKV9-120*01	IGKV17-121*01	IGKV14-100*01	IGKV17-121*01	IGKV17-121*01	IGKV14-100*01	IGKV4-70*01		IGKV9-124*01	IGKV17-121*01
	IGKV9-120*01	IGKV14-100*01	IGKV9-120*01	IGKV14-100*01	IGKV9-120*01	IGKV8-30*01	IGKV9-120*01 F	IGKV9-120*01 F	IGKV14-100*01	IGKV9-120*01	IGKV9-120*01	IGKV17-121*01	IGKV14-100*01	IGKV17-121*01	IGKV4-91*01	IGKV14-100*01	IGKV4-70*01		IGKV9-124*01	IGKV17-121*01
	IGKV9-120*01	IGKV14-100*01	IGKV9-120*01	IGKV14-100*01	IGKV9-120*01	IGKV8-30*01	IGKV9-120*01 F	IGKV9-120*01 F	IGKV17-121*01	IGKV9-120*01	IGKV9-120*01	IGKV17-121*01	IGKV14-100*01	IGKV17-121*01	IGKV4-91*01	IGKV14-100*01	IGKV4-70*01		IGKV9-124*01	IGKV17-121*01
	IGKV9-120*01	IGKV14-100*01	IGKV9-120*01	IGKV14-100*01	IGKV9-120*01	IGKV8-30*01	IGKV9-120*01 F	IGKV9-120*01 F	IGKV14-100*01	IGKV9-120*01	IGKV14-100*01	IGKV17-121*01	IGKV14-100*01	IGKV17-121*01	IGKV17-121*01	IGKV14-100*01	IGKV4-70*01		IGKV9-124*01	IGKV17-121*01
	IGKV9-120*01	IGKV14-100*01	IGKV9-120*01	IGKV14-100*01	IGKV9-120*01	IGKV8-30*01	IGKV9-120*01 F	IGKV9-120*01 F	IGKV14-100*01	IGKV9-120*01	IGKV14-100*01	IGKV17-121*01	IGKV14-100*01	IGKV17-121*01	IGKV17-121*01	IGKV14-100*01	IGKV4-70*01		IGKV9-124*01	IGKV17-121*01
	IGKV9-120*01	IGKV14-100*01	IGKV9-120*01	IGKV14-100*01	IGKV9-120*01	IGKV8-30*01	IGKV9-120*01 F	IGKV9-120*01 F	IGKV14-100*01	IGKV9-120*01	IGKV14-100*01	IGKV17-121*01	IGKV14-100*01	IGKV17-121*01	IGKV4-91*01	IGKV14-100*01	IGKV4-70*01		IGKV9-124*01	IGKV17-121*01
	IGKV9-120*01	IGKV14-100*01	IGKV9-120*01	IGKV14-100*01	IGKV9-120*01	IGKV9-120*01	IGKV9-120*01 F	IGKV9-120*01 F	IGKV14-100*01	IGKV9-120*01	IGKV9-120*01	IGKV17-121*01	IGKV14-100*01	IGKV17-121*01	IGKV17-121*01	IGKV14-100*01	IGKV4-70*01		IGKV9-124*01	IGKV17-121*01
	IGKV9-120*01	IGKV14-100*01	IGKV9-120*01	IGKV14-100*01	IGKV9-120*01	IGKV8-30*01	IGKV9-120*01 F	IGKV9-120*01 F	IGKV14-100*01	IGKV9-120*01	IGKV14-100*01	IGKV17-121*01	IGKV14-100*01	IGKV17-121*01	IGKV17-121*01	IGKV14-100*01	IGKV4-70*01		IGKV9-124*01	IGKV17-121*01
	IGKV9-120*01	IGKV14-100*01	IGKV9-120*01	IGKV14-100*01	IGKV9-120*01	IGKV9-120*01	IGKV9-120*01 F	IGKV9-120*01 F	IGKV4-81*01	IGKV9-120*01	IGKV9-120*01	IGKV17-121*01	IGKV14-100*01	IGKV17-121*01	IGKV17-121*01	IGKV14-100*01	IGKV4-70*01		IGKV9-124*01	IGKV17-121*01
	IGKV9-120*01	IGKV14-100*01	IGKV9-120*01	IGKV14-100*01	IGKV9-120*01	IGKV8-30*01	IGKV9-120*01 F	IGKV9-120*01 F	IGKV14-100*01	IGKV9-120*01	IGKV9-120*01	IGKV17-121*01	IGKV14-100*01	IGKV17-121*01	IGKV17-121*01	IGKV14-100*01	IGKV4-70*01		IGKV9-124*01	IGKV17-121*01
	IGKV9-120*01	IGKV14-100*01	IGKV9-120*01	IGKV14-100*01	IGKV9-120*01	IGKV8-30*01	IGKV9-120*01 F	IGKV9-120*01 F	IGKV14-100*01	IGKV9-120*01	IGKV14-100*01	IGKV17-121*01	IGKV9-120*01	IGKV17-121*01	IGKV4-91*01	IGKV14-100*01	IGKV4-70*01		IGKV9-124*01	IGKV17-121*01
	IGKV9-120*01	IGKV14-100*01	IGKV9-120*01	IGKV14-100*01	IGKV9-120*01	IGKV8-30*01	IGKV9-120*01 F	IGKV9-120*01 F	IGKV14-100*01	IGKV9-120*01	IGKV14-100*01	IGKV17-121*01	IGKV14-100*01	IGKV17-121*01	IGKV17-121*01	IGKV14-100*01	IGKV4-70*01		IGKV9-124*01	IGKV17-121*01
	IGKV9-120*01	IGKV14-100*01	IGKV9-120*01	IGKV14-100*01	IGKV9-120*01	IGKV8-30*01	IGKV9-120*01 F	IGKV9-120*01 F	IGKV14-100*01	IGKV9-120*01	IGKV9-120*01	IGKV17-121*01	IGKV14-100*01	IGKV17-121*01	IGKV17-121*01	IGKV14-100*01	IGKV4-70*01		IGKV9-124*01	IGKV17-121*01
	IGKV9-120*01	IGKV14-100*01	IGKV9-120*01	IGKV14-100*01	IGKV9-120*01	IGKV8-30*01	IGKV9-120*01 F	IGKV9-120*01 F	IGKV14-100*01	IGKV9-120*01	IGKV9-120*01	IGKV17-121*01	IGKV14-100*01	IGKV17-121*01	IGKV17-121*01	IGKV14-100*01	IGKV4-70*01		IGKV9-124*01	IGKV17-121*01
	IGKV9-120*01	IGKV14-100*01	IGKV9-120*01	IGKV14-100*01	IGKV9-120*01	IGKV9-120*01	IGKV9-120*01 F	IGKV9-120*01 F	IGKV14-100*01	IGKV9-120*01	IGKV9-120*01	IGKV17-121*01	IGKV14-100*01	IGKV17-121*01	IGKV4-91*01	IGKV14-100*01	IGKV4-70*01		IGKV9-124*01	IGKV4-68*01
	IGKV9-120*01	IGKV14-100*01	IGKV9-120*01	IGKV14-100*01	IGKV9-120*01	IGKV8-30*01	IGKV9-120*01 F	IGKV9-120*01 F	IGKV14-100*01	IGKV9-120*01	IGKV9-120*01	IGKV17-121*01	IGKV14-100*01	IGKV17-121*01	IGKV4-91*01	IGKV14-100*01	IGKV4-70*01		IGKV9-124*01	IGKV17-121*01
	IGKV9-120*01	IGKV14-100*01	IGKV9-120*01	IGKV14-100*01	IGKV9-120*01	IGKV9-120*01	IGKV9-120*01 F	IGKV9-120*01 F	IGKV14-100*01	IGKV9-120*01	IGKV14-100*01	IGKV17-121*01	IGKV14-100*01	IGKV17-121*01	IGKV4-91*01	IGKV14-100*01	IGKV4-70*01		IGKV9-124*01	IGKV17-121*01
	IGKV9-120*01	IGKV14-100*01	IGKV9-120*01	IGKV14-100*01	IGKV9-120*01	IGKV8-30*01	IGKV9-120*01 F	IGKV9-120*01 F	IGKV14-100*01	IGKV9-120*01	IGKV14-100*01	IGKV17-121*01	IGKV14-100*01	IGKV17-121*01	IGKV17-121*01	IGKV14-100*01	IGKV4-70*01		IGKV9-124*01	IGKV17-121*01
	IGKV9-120*01	IGKV14-100*01	IGKV9-120*01	IGKV14-100*01	IGKV9-120*01	IGKV9-120*01	IGKV9-120*01 F	IGKV9-120*01 F	IGKV14-100*01	IGKV9-120*01	IGKV9-120*01	IGKV17-121*01	IGKV14-100*01	IGKV17-121*01	IGKV4-91*01	IGKV14-100*01	IGKV4-70*01		IGKV9-124*01	IGKV17-121*01
	IGKV9-120*01	IGKV14-100*01	IGKV9-120*01	IGKV14-100*01	IGKV9-120*01	IGKV9-120*01	IGKV9-120*01 F	IGKV14-111*01 F	IGKV14-100*01	IGKV9-120*01	IGKV14-100*01	IGKV17-121*01	IGKV14-100*01	IGKV17-121*01	IGKV17-121*01	IGKV14-100*01	IGKV4-70*01		IGKV9-124*01	IGKV17-121*01
	IGKV9-120*01	IGKV14-100*01	IGKV9-120*01	IGKV14-100*01	IGKV9-120*01	IGKV8-30*01	IGKV9-120*01 F	IGKV9-120*01 F	IGKV14-100*01	IGKV9-120*01	IGKV14-100*01	IGKV17-121*01	IGKV14-100*01	IGKV17-121*01	IGKV17-121*01	IGKV14-100*01	IGKV4-70*01		IGKV9-124*01	IGKV17-121*01
	IGKV9-120*01	IGKV14-100*01	IGKV9-120*01	IGKV14-100*01	IGKV9-120*01	IGKV9-120*01	IGKV9-120*01 F	IGKV14-111*01 F	IGKV14-100*01	IGKV9-120*01	IGKV14-100*01	IGKV17-121*01	IGKV14-100*01	IGKV17-121*01	IGKV4-91*01	IGKV14-100*01	IGKV4-70*01		IGKV9-124*01	IGKV17-121*01
	IGKV9-120*01	IGKV14-100*01	IGKV9-120*01	IGKV14-100*01	IGKV9-120*01	IGKV8-30*01	IGKV9-120*01 F	IGKV9-120*01 F	IGKV14-100*01	IGKV9-120*01	IGKV9-120*01	IGKV17-121*01	IGKV14-100*01	IGKV17-121*01	IGKV17-121*01	IGKV14-100*01	IGKV4-70*01		IGKV9-124*01	IGKV17-121*01
	IGKV9-120*01	IGKV14-100*01	IGKV9-120*01	IGKV14-100*01	IGKV9-120*01	IGKV9-120*01	IGKV9-120*01 F	IGKV9-120*01 F	IGKV14-100*01	IGKV9-120*01	IGKV14-100*01	IGKV17-121*01	IGKV14-100*01	IGKV17-121*01	IGKV4-91*01	IGKV14-100*01	IGKV4-70*01		IGKV9-124*01	IGKV17-121*01
	IGKV9-120*01	IGKV14-100*01	IGKV9-120*01	IGKV14-100*01	IGKV9-120*01	IGKV8-30*01	IGKV9-120*01 F	IGKV9-120*01 F	IGKV14-100*01	IGKV9-120*01	IGKV14-100*01	IGKV17-121*01	IGKV9-120*01	IGKV17-121*01	IGKV17-121*01	IGKV14-100*01	IGKV4-70*01		IGKV9-124*01	IGKV17-121*01
	IGKV9-120*01	IGKV14-100*01	IGKV9-120*01	IGKV14-100*01	IGKV9-120*01	IGKV8-30*01	IGKV9-120*01 F	IGKV9-120*01 F	IGKV14-100*01	IGKV9-120*01	IGKV14-100*01	IGKV17-121*01	IGKV14-100*01	IGKV17-121*01	IGKV17-121*01	IGKV14-100*01	IGKV4-70*01		IGKV9-124*01	IGKV17-121*01
	IGKV9-120*01	IGKV14-100*01	IGKV9-120*01	IGKV14-100*01	IGKV9-120*01	IGKV8-30*01	IGKV9-120*01 F	IGKV9-120*01 F	IGKV14-100*01	IGKV9-120*01	IGKV9-120*01	IGKV17-121*01	IGKV9-120*01	IGKV17-121*01	IGKV17-121*01	IGKV14-100*01	IGKV4-70*01		IGKV9-124*01	IGKV17-121*01
	IGKV9-120*01	IGKV14-100*01	IGKV9-120*01	IGKV14-100*01	IGKV9-120*01	IGKV8-30*01	IGKV9-120*01 F	IGKV9-120*01 F	IGKV14-100*01	IGKV9-120*01	IGKV9-120*01	IGKV17-121*01	IGKV9-120*01	IGKV17-121*01	IGKV4-91*01	IGKV14-100*01	IGKV4-70*01		IGKV9-124*01	IGKV17-121*01
	IGKV9-120*01	IGKV14-100*01	IGKV9-120*01	IGKV14-100*01	IGKV9-120*01	IGKV8-30*01	IGKV9-120*01 F	IGKV9-120*01 F	IGKV14-100*01	IGKV9-120*01	IGKV9-120*01	IGKV17-121*01	IGKV14-100*01	IGKV17-121*01	IGKV17-121*01	IGKV14-100*01	IGKV4-70*01		IGKV9-124*01	IGKV17-121*01
	IGKV9-120*01	IGKV14-100*01	IGKV9-120*01	IGKV14-100*01	IGKV9-120*01	IGKV8-30*01	IGKV9-120*01 F	IGKV9-120*01 F	IGKV14-100*01	IGKV9-120*01	IGKV14-100*01	IGKV17-121*01	IGKV14-100*01	IGKV17-121*01	IGKV4-91*01	IGKV14-100*01	IGKV4-70*01		IGKV9-124*01	IGKV17-121*01
	IGKV9-120*01	IGKV14-100*01	IGKV9-120*01	IGKV14-100*01	IGKV9-120*01	IGKV9-120*01	IGKV9-120*01 F	IGKV9-120*01 F	IGKV14-100*01	IGKV9-120*01	IGKV14-100*01	IGKV17-121*01	IGKV9-120*01	IGKV17-121*01	IGKV4-91*01	IGKV14-100*01	IGKV4-70*01		IGKV9-124*01	IGKV17-121*01
	IGKV9-120*01	IGKV14-100*01	IGKV9-120*01	IGKV14-100*01	IGKV9-120*01	IGKV8-30*01	IGKV9-120*01 F	IGKV9-120*01 F	IGKV14-100*01	IGKV9-120*01	IGKV9-120*01	IGKV17-121*01	IGKV9-120*01	IGKV17-121*01	IGKV4-91*01	IGKV14-100*01	IGKV4-70*01		IGKV9-124*01	IGKV17-121*01
	IGKV9-120*01	IGKV14-100*01	IGKV9-120*01	IGKV14-100*01	IGKV9-120*01	IGKV8-30*01	IGKV9-120*01 F	IGKV9-120*01 F	IGKV14-100*01	IGKV9-120*01	IGKV9-120*01	IGKV17-121*01	IGKV14-100*01	IGKV17-121*01	IGKV17-121*01	IGKV14-100*01	IGKV4-70*01		IGKV9-124*01	IGKV17-121*01
	IGKV9-120*01	IGKV14-100*01	IGKV9-120*01	IGKV14-100*01	IGKV9-120*01	IGKV8-30*01	IGKV9-120*01 F	IGKV9-120*01 F	IGKV14-100*01	IGKV9-120*01	IGKV9-120*01	IGKV17-121*01	IGKV9-120*01	IGKV17-121*01	IGKV17-121*01	IGKV14-100*01	IGKV4-70*01		IGKV9-124*01	IGKV17-121*01
	IGKV9-120*01	IGKV14-100*01	IGKV9-120*01	IGKV14-100*01	IGKV9-120*01	IGKV9-120*01	IGKV9-120*01 F	IGKV9-120*01 F	IGKV14-100*01	IGKV9-120*01	IGKV9-120*01	IGKV17-121*01	IGKV14-100*01	IGKV17-121*01	IGKV17-121*01	IGKV14-100*01	IGKV4-70*01		IGKV9-124*01	IGKV17-121*01
	IGKV9-120*01	IGKV14-100*01	IGKV9-120*01	IGKV14-100*01	IGKV9-120*01	IGKV9-120*01	IGKV9-120*01 F	IGKV9-120*01 F	IGKV17-121*01	IGKV9-120*01	IGKV9-120*01	IGKV17-121*01	IGKV9-120*01	IGKV17-121*01	IGKV17-121*01	IGKV14-100*01	IGKV4-70*01		IGKV9-124*01	IGKV17-121*01
	IGKV9-120*01	IGKV14-100*01	IGKV9-120*01	IGKV14-100*01	IGKV9-120*01	IGKV8-30*01	IGKV9-120*01 F	IGKV9-120*01 F	IGKV14-100*01	IGKV9-120*01	IGKV14-100*01	IGKV17-121*01	IGKV14-100*01	IGKV17-121*01	IGKV17-121*01	IGKV14-100*01	IGKV4-70*01		IGKV9-124*01	IGKV17-121*01
	IGKV9-120*01	IGKV14-100*01	IGKV9-120*01	IGKV14-100*01	IGKV9-120*01	IGKV9-120*01	IGKV9-120*01 F	IGKV9-120*01 F	IGKV14-100*01	IGKV9-120*01	IGKV14-100*01	IGKV17-121*01	IGKV9-120*01	IGKV17-121*01	IGKV4-91*01	IGKV14-100*01	IGKV4-70*01		IGKV9-124*01	IGKV17-121*01
	IGKV9-120*01	IGKV14-100*01	IGKV9-120*01	IGKV14-100*01	IGKV9-120*01	IGKV8-30*01	IGKV9-120*01 F	IGKV9-120*01 F	IGKV14-100*01	IGKV9-120*01	IGKV9-120*01	IGKV17-121*01	IGKV9-120*01	IGKV17-121*01	IGKV17-121*01	IGKV14-100*01	IGKV4-70*01		IGKV9-124*01	IGKV17-121*01
	IGKV9-120*01	IGKV14-100*01	IGKV9-120*01	IGKV14-100*01	IGKV9-120*01	IGKV8-30*01	IGKV9-120*01 F	IGKV9-120*01 F	IGKV14-100*01	IGKV9-120*01	IGKV9-120*01	IGKV17-121*01	IGKV14-100*01	IGKV17-121*01	IGKV17-121*01	IGKV14-100*01	IGKV4-70*01		IGKV9-124*01	IGKV17-121*01
	IGKV9-120*01	IGKV14-100*01	IGKV9-120*01	IGKV14-100*01	IGKV9-120*01	IGKV8-30*01	IGKV9-120*01 F	IGKV9-120*01 F	IGKV14-100*01	IGKV9-120*01	IGKV14-100*01	IGKV17-121*01	IGKV14-100*01	IGKV17-121*01	IGKV17-121*01	IGKV14-100*01	IGKV4-70*01		IGKV9-124*01	IGKV17-121*01
	IGKV9-120*01	IGKV14-100*01	IGKV9-120*01	IGKV14-100*01	IGKV9-120*01	IGKV8-30*01	IGKV9-120*01 F	IGKV9-120*01 F	IGKV17-121*01	IGKV9-120*01	IGKV14-100*01	IGKV17-121*01	IGKV14-100*01	IGKV17-121*01	IGKV17-121*01	IGKV14-100*01	IGKV4-70*01		IGKV9-124*01	IGKV17-121*01
	IGKV9-120*01	IGKV14-100*01	IGKV9-120*01	IGKV14-100*01	IGKV9-120*01	IGKV8-30*01	IGKV9-120*01 F	IGKV9-120*01 F	IGKV14-100*01	IGKV9-120*01	IGKV14-100*01	IGKV17-121*01	IGKV9-120*01	IGKV17-121*01	IGKV17-121*01	IGKV14-100*01	IGKV4-70*01		IGKV9-124*01	IGKV17-121*01
	IGKV9-120*01	IGKV14-100*01	IGKV9-120*01	IGKV14-100*01	IGKV9-120*01	IGKV8-30*01	IGKV9-120*01 F	IGKV9-120*01 F	IGKV14-100*01	IGKV9-120*01	IGKV14-100*01	IGKV17-121*01	IGKV14-100*01	IGKV17-121*01	IGKV4-91*01	IGKV14-100*01	IGKV4-70*01		IGKV9-124*01	IGKV17-121*01
	IGKV9-120*01	IGKV14-100*01	IGKV9-120*01	IGKV14-100*01	IGKV9-120*01	IGKV8-30*01	IGKV9-120*01 F	IGKV9-120*01 F	IGKV14-100*01	IGKV9-120*01	IGKV14-100*01	IGKV17-121*01	IGKV14-100*01	IGKV17-121*01	IGKV4-91*01	IGKV14-100*01	IGKV4-70*01		IGKV9-124*01	IGKV17-121*01
	IGKV9-120*01	IGKV14-100*01	IGKV9-120*01	IGKV14-100*01	IGKV9-120*01	IGKV8-30*01	IGKV9-120*01 F	IGKV9-120*01 F	IGKV14-100*01	IGKV9-120*01	IGKV9-120*01	IGKV17-121*01	IGKV9-120*01	IGKV17-121*01	IGKV17-121*01	IGKV14-100*01	IGKV4-70*01		IGKV9-124*01	IGKV17-121*01
	IGKV9-120*01	IGKV14-100*01	IGKV9-120*01	IGKV14-100*01	IGKV9-120*01	IGKV8-30*01	IGKV9-120*01 F	IGKV9-120*01 F	IGKV8-24*01	IGKV9-120*01	IGKV9-120*01	IGKV17-121*01	IGKV14-100*01	IGKV17-121*01	IGKV17-121*01	IGKV14-100*01	IGKV4-70*01		IGKV9-124*01	IGKV17-121*01
	IGKV9-120*01	IGKV14-100*01	IGKV9-120*01	IGKV14-100*01	IGKV9-120*01	IGKV8-30*01	IGKV9-120*01 F	IGKV9-120*01 F	IGKV17-121*01	IGKV9-120*01	IGKV9-120*01	IGKV17-121*01	IGKV14-100*01	IGKV17-121*01	IGKV17-121*01	IGKV14-100*01	IGKV4-70*01		IGKV9-124*01	IGKV17-121*01
	IGKV9-120*01	IGKV14-100*01	IGKV9-120*01	IGKV14-100*01	IGKV9-120*01	IGKV8-30*01	IGKV9-120*01 F	IGKV9-120*01 F	IGKV14-100*01	IGKV9-120*01	IGKV14-100*01	IGKV17-121*01	IGKV14-100*01	IGKV17-121*01	IGKV17-121*01	IGKV14-100*01	IGKV4-70*01		IGKV9-124*01	IGKV17-121*01
	IGKV9-120*01	IGKV14-100*01	IGKV9-120*01	IGKV14-100*01	IGKV9-120*01	IGKV9-120*01	IGKV9-120*01 F	IGKV9-120*01 F	IGKV14-100*01	IGKV9-120*01	IGKV14-100*01	IGKV17-121*01	IGKV14-100*01	IGKV17-121*01	IGKV4-91*01	IGKV14-100*01	IGKV4-70*01		IGKV9-124*01	IGKV17-121*01
	IGKV9-120*01	IGKV14-100*01	IGKV9-120*01	IGKV14-100*01	IGKV9-120*01	IGKV8-30*01	IGKV9-120*01 F	IGKV9-120*01 F	IGKV14-100*01	IGKV9-120*01	IGKV14-100*01	IGKV17-121*01	IGKV14-100*01	IGKV17-121*01	IGKV17-121*01	IGKV14-100*01	IGKV4-70*01		IGKV9-124*01	IGKV17-121*01
	IGKV9-120*01	IGKV14-100*01	IGKV9-120*01	IGKV14-100*01	IGKV9-120*01	IGKV9-120*01	IGKV9-120*01 F	IGKV9-120*01 F	IGKV14-100*01	IGKV9-120*01	IGKV14-100*01	IGKV17-121*01	IGKV14-100*01	IGKV17-121*01	IGKV17-121*01	IGKV14-100*01	IGKV4-70*01		IGKV9-124*01	IGKV17-121*01
	IGKV9-120*01	IGKV14-100*01	IGKV9-120*01	IGKV14-100*01	IGKV9-120*01	IGKV9-120*01	IGKV9-120*01 F	IGKV9-120*01 F	IGKV14-100*01	IGKV9-120*01	IGKV9-120*01	IGKV17-121*01	IGKV14-100*01	IGKV17-121*01	IGKV4-91*01	IGKV14-100*01	IGKV4-70*01		IGKV9-124*01	IGKV17-121*01
	IGKV9-120*01	IGKV14-100*01	IGKV9-120*01	IGKV14-100*01	IGKV9-120*01	IGKV8-30*01	IGKV9-120*01 F	IGKV14-111*01 F	IGKV14-100*01	IGKV9-120*01	IGKV9-120*01	IGKV17-121*01	IGKV14-100*01	IGKV17-121*01	IGKV17-121*01	IGKV14-100*01	IGKV4-70*01		IGKV9-124*01	IGKV17-121*01
	IGKV9-120*01	IGKV14-100*01	IGKV9-120*01	IGKV14-100*01	IGKV9-120*01	IGKV9-120*01	IGKV9-120*01 F	IGKV14-111*01 F	IGKV14-100*01	IGKV9-120*01	IGKV14-100*01	IGKV17-121*01	IGKV9-120*01	IGKV17-121*01	IGKV17-121*01	IGKV14-100*01	IGKV4-70*01		IGKV9-124*01	IGKV17-121*01
	IGKV9-120*01	IGKV14-100*01	IGKV9-120*01	IGKV14-100*01	IGKV9-120*01	IGKV9-120*01	IGKV9-120*01 F	IGKV9-120*01 F	IGKV17-121*01	IGKV9-120*01	IGKV14-100*01	IGKV17-121*01	IGKV14-100*01	IGKV17-121*01	IGKV4-91*01	IGKV14-100*01	IGKV4-70*01		IGKV9-124*01	IGKV17-121*01
	IGKV9-120*01	IGKV14-100*01	IGKV9-120*01	IGKV14-100*01	IGKV9-120*01	IGKV8-30*01	IGKV9-120*01 F	IGKV9-120*01 F	IGKV14-100*01	IGKV9-120*01	IGKV9-120*01	IGKV17-121*01	IGKV9-120*01	IGKV17-121*01	IGKV4-91*01	IGKV14-100*01	IGKV4-70*01		IGKV9-124*01	IGKV17-121*01
	IGKV9-120*01	IGKV14-100*01	IGKV9-120*01	IGKV14-100*01	IGKV9-120*01	IGKV9-120*01	IGKV9-120*01 F	IGKV14-111*01 F	IGKV14-100*01	IGKV9-120*01	IGKV9-120*01	IGKV17-121*01	IGKV14-100*01	IGKV17-121*01	IGKV17-121*01	IGKV14-100*01	IGKV4-70*01		IGKV9-124*01	IGKV17-121*01
	IGKV9-120*01	IGKV14-100*01	IGKV9-120*01	IGKV14-100*01	IGKV9-120*01	IGKV9-120*01	IGKV9-120*01 F	IGKV9-120*01 F	IGKV14-100*01	IGKV9-120*01	IGKV9-120*01	IGKV17-121*01	IGKV14-100*01	IGKV17-121*01	IGKV17-121*01	IGKV14-100*01	IGKV4-70*01		IGKV9-124*01	IGKV17-121*01
	IGKV9-120*01	IGKV14-100*01	IGKV9-120*01	IGKV14-100*01	IGKV9-120*01	IGKV8-30*01	IGKV9-120*01 F	IGKV9-120*01 F	IGKV14-100*01	IGKV9-120*01	IGKV14-100*01	IGKV17-121*01	IGKV9-120*01	IGKV17-121*01	IGKV4-91*01	IGKV14-100*01	IGKV4-70*01		IGKV9-124*01	IGKV17-121*01
	IGKV9-120*01	IGKV14-100*01	IGKV9-120*01	IGKV14-100*01	IGKV9-120*01	IGKV8-30*01	IGKV9-120*01 F	IGKV9-120*01 F	IGKV14-100*01	IGKV9-120*01	IGKV9-120*01	IGKV17-121*01	IGKV9-120*01	IGKV17-121*01	IGKV17-121*01	IGKV14-100*01	IGKV4-70*01		IGKV9-124*01	IGKV17-121*01
	IGKV9-120*01	IGKV14-100*01	IGKV9-120*01	IGKV14-100*01	IGKV9-120*01	IGKV8-30*01	IGKV9-120*01 F	IGKV14-111*01 F	IGKV14-100*01	IGKV9-120*01	IGKV14-100*01	IGKV17-121*01	IGKV14-100*01	IGKV17-121*01	IGKV17-121*01	IGKV14-100*01	IGKV4-70*01		IGKV9-124*01	IGKV17-121*01
	IGKV9-120*01	IGKV14-100*01	IGKV9-120*01	IGKV14-100*01	IGKV9-120*01	IGKV8-30*01	IGKV9-120*01 F	IGKV14-111*01 F	IGKV9-120*01	IGKV9-120*01	IGKV14-100*01	IGKV17-121*01	IGKV14-100*01	IGKV17-121*01	IGKV4-91*01	IGKV14-100*01	IGKV4-70*01		IGKV9-124*01	IGKV17-121*01
	IGKV9-120*01	IGKV14-100*01	IGKV9-120*01	IGKV14-100*01	IGKV9-120*01	IGKV8-30*01	IGKV9-120*01 F	IGKV9-120*01 F	IGKV14-100*01	IGKV9-120*01	IGKV9-120*01	IGKV17-121*01	IGKV14-100*01	IGKV17-121*01	IGKV4-91*01	IGKV14-100*01	IGKV4-70*01		IGKV9-124*01	IGKV17-121*01
	IGKV9-120*01	IGKV14-100*01	IGKV9-120*01	IGKV14-100*01	IGKV9-120*01	IGKV8-30*01	IGKV9-120*01 F	IGKV1-135*01 F	IGKV14-100*01	IGKV9-120*01	IGKV9-120*01	IGKV17-121*01	IGKV14-100*01	IGKV17-121*01	IGKV17-121*01	IGKV14-100*01	IGKV4-70*01		IGKV9-124*01	IGKV17-121*01
	IGKV9-120*01	IGKV14-100*01	IGKV9-120*01	IGKV14-100*01	IGKV9-120*01	IGKV8-30*01	IGKV9-120*01 F	IGKV9-120*01 F	IGKV14-100*01	IGKV9-120*01	IGKV14-100*01	IGKV17-121*01	IGKV14-100*01	IGKV17-121*01	IGKV17-121*01	IGKV14-100*01	IGKV4-70*01		IGKV9-124*01	IGKV17-121*01
	IGKV9-120*01	IGKV14-100*01	IGKV9-120*01	IGKV14-100*01	IGKV9-120*01	IGKV9-120*01	IGKV9-120*01 F	IGKV9-120*01 F	IGKV14-100*01	IGKV9-120*01	IGKV9-120*01	IGKV17-121*01	IGKV14-100*01	IGKV17-121*01	IGKV17-121*01	IGKV14-100*01	IGKV4-70*01		IGKV9-124*01	IGKV17-121*01
	IGKV9-120*01	IGKV14-100*01	IGKV9-120*01	IGKV14-100*01	IGKV9-120*01	IGKV8-30*01	IGKV9-120*01 F	IGKV9-120*01 F	IGKV14-100*01	IGKV9-120*01	IGKV9-120*01	IGKV17-121*01	IGKV14-100*01	IGKV17-121*01	IGKV17-121*01	IGKV14-100*01	IGKV4-70*01		IGKV9-124*01	IGKV17-121*01
	IGKV9-120*01	IGKV14-100*01	IGKV9-120*01	IGKV14-100*01	IGKV9-120*01	IGKV9-120*01	IGKV9-120*01 F	IGKV9-120*01 F	IGKV14-100*01	IGKV9-120*01	IGKV9-120*01	IGKV17-121*01	IGKV14-100*01	IGKV17-121*01	IGKV4-91*01	IGKV14-100*01	IGKV4-70*01		IGKV9-124*01	IGKV17-121*01
	IGKV9-120*01	IGKV14-100*01	IGKV9-120*01	IGKV14-100*01	IGKV9-120*01	IGKV8-30*01	IGKV9-120*01 F	IGKV9-120*01 F	IGKV14-111*01	IGKV9-120*01	IGKV14-100*01	IGKV17-121*01	IGKV14-100*01	IGKV17-121*01	IGKV17-121*01	IGKV14-100*01	IGKV4-70*01		IGKV9-124*01	IGKV17-121*01
	IGKV9-120*01	IGKV14-100*01	IGKV9-120*01	IGKV14-100*01	IGKV9-120*01	IGKV9-120*01	IGKV9-120*01 F	IGKV9-120*01 F	IGKV17-121*01	IGKV9-120*01	IGKV14-100*01	IGKV17-121*01	IGKV14-100*01	IGKV17-121*01	IGKV17-121*01	IGKV14-100*01	IGKV4-70*01		IGKV9-124*01	IGKV17-121*01
	IGKV9-120*01	IGKV14-100*01	IGKV9-120*01	IGKV14-100*01	IGKV9-120*01	IGKV8-30*01	IGKV9-120*01 F	IGKV9-120*01 F	IGKV17-121*01	IGKV9-120*01	IGKV14-100*01	IGKV17-121*01	IGKV14-100*01	IGKV17-121*01	IGKV4-91*01	IGKV14-100*01	IGKV4-70*01		IGKV9-124*01	IGKV17-121*01
	IGKV9-120*01	IGKV14-100*01	IGKV9-120*01	IGKV14-100*01	IGKV9-120*01	IGKV8-30*01	IGKV9-120*01 F	IGKV9-120*01 F	IGKV14-100*01	IGKV9-120*01	IGKV9-120*01	IGKV17-121*01	IGKV9-120*01	IGKV17-121*01	IGKV17-121*01	IGKV14-100*01	IGKV4-70*01		IGKV9-124*01	IGKV17-121*01
	IGKV9-120*01	IGKV14-100*01	IGKV9-120*01	IGKV14-100*01	IGKV9-120*01	IGKV9-120*01	IGKV9-120*01 F	IGKV14-111*01 F	IGKV14-100*01	IGKV9-120*01	IGKV9-120*01	IGKV17-121*01	IGKV9-120*01	IGKV17-121*01	IGKV4-91*01	IGKV14-100*01	IGKV4-70*01		IGKV9-124*01	IGKV17-121*01
	IGKV9-120*01	IGKV14-100*01	IGKV9-120*01	IGKV14-100*01	IGKV9-120*01	IGKV8-30*01	IGKV9-120*01 F	IGKV14-111*01 F	IGKV14-100*01	IGKV9-120*01	IGKV14-100*01	IGKV17-121*01	IGKV14-100*01	IGKV17-121*01	IGKV17-121*01	IGKV14-100*01	IGKV4-70*01		IGKV9-124*01	IGKV17-121*01
	IGKV9-120*01	IGKV14-100*01	IGKV9-120*01	IGKV14-100*01	IGKV9-120*01	IGKV8-30*01	IGKV9-120*01 F	IGKV14-111*01 F	IGKV14-100*01	IGKV9-120*01	IGKV9-120*01	IGKV17-121*01	IGKV14-100*01	IGKV17-121*01	IGKV17-121*01	IGKV14-100*01	IGKV4-70*01		IGKV9-124*01	IGKV17-121*01
	IGKV9-120*01	IGKV14-100*01	IGKV9-120*01	IGKV14-100*01	IGKV9-120*01	IGKV9-120*01	IGKV9-120*01 F	IGKV9-120*01 F	IGKV14-100*01	IGKV9-120*01	IGKV14-100*01	IGKV17-121*01	IGKV14-100*01	IGKV17-121*01	IGKV17-121*01	IGKV14-100*01	IGKV4-70*01		IGKV9-124*01	IGKV17-121*01
	IGKV9-120*01	IGKV14-100*01	IGKV9-120*01	IGKV14-100*01	IGKV9-120*01	IGKV8-30*01	IGKV9-120*01 F	IGKV14-111*01 F	IGKV14-100*01	IGKV9-120*01	IGKV14-100*01	IGKV17-121*01	IGKV14-100*01	IGKV17-121*01	IGKV17-121*01	IGKV14-100*01	IGKV4-70*01		IGKV9-124*01	IGKV17-121*01
	IGKV9-120*01	IGKV14-100*01	IGKV9-120*01	IGKV14-100*01	IGKV9-120*01	IGKV8-30*01	IGKV9-120*01 F	IGKV9-120*01 F	IGKV14-100*01	IGKV9-120*01	IGKV14-100*01	IGKV17-121*01	IGKV14-100*01	IGKV17-121*01	IGKV17-121*01	IGKV14-100*01	IGKV4-70*01		IGKV9-124*01	IGKV17-121*01
	IGKV9-120*01	IGKV14-100*01	IGKV9-120*01	IGKV14-100*01	IGKV9-120*01	IGKV9-120*01	IGKV9-120*01 F	IGKV9-120*01 F	IGKV14-100*01	IGKV9-120*01	IGKV9-120*01	IGKV17-121*01	IGKV14-100*01	IGKV17-121*01	IGKV4-91*01	IGKV14-100*01	IGKV4-70*01		IGKV9-124*01	IGKV17-121*01
	IGKV9-120*01	IGKV14-100*01	IGKV9-120*01	IGKV14-100*01	IGKV9-120*01	IGKV8-30*01	IGKV9-120*01 F	IGKV14-111*01 F	IGKV14-100*01	IGKV9-120*01	IGKV9-120*01	IGKV17-121*01	IGKV14-100*01	IGKV17-121*01	IGKV4-91*01	IGKV14-100*01	IGKV4-70*01		IGKV9-124*01	IGKV17-121*01
	IGKV9-120*01	IGKV14-100*01	IGKV9-120*01	IGKV14-100*01	IGKV9-120*01	IGKV8-30*01	IGKV9-120*01 F	IGKV9-120*01 F	IGKV14-100*01	IGKV9-120*01	IGKV14-100*01	IGKV17-121*01	IGKV9-120*01	IGKV17-121*01	IGKV17-121*01	IGKV14-100*01	IGKV4-70*01		IGKV9-124*01	IGKV17-121*01
	IGKV9-120*01	IGKV14-100*01	IGKV9-120*01	IGKV14-100*01	IGKV9-120*01	IGKV9-120*01	IGKV9-120*01 F	IGKV14-111*01 F	IGKV17-121*01	IGKV9-120*01	IGKV14-100*01	IGKV17-121*01	IGKV14-100*01	IGKV17-121*01	IGKV17-121*01	IGKV14-100*01	IGKV4-70*01		IGKV9-124*01	IGKV17-121*01
	IGKV9-120*01	IGKV14-100*01	IGKV9-120*01	IGKV14-100*01	IGKV9-120*01	IGKV9-120*01	IGKV9-120*01 F	IGKV9-120*01 F	IGKV14-100*01	IGKV9-120*01	IGKV14-100*01	IGKV17-121*01	IGKV14-100*01	IGKV17-121*01	IGKV17-121*01	IGKV14-100*01	IGKV4-70*01		IGKV9-124*01	IGKV17-121*01
	IGKV9-120*01	IGKV14-100*01	IGKV9-120*01	IGKV14-100*01	IGKV9-120*01	IGKV9-120*01	IGKV9-120*01 F	IGKV9-120*01 F	IGKV14-100*01	IGKV9-120*01	IGKV9-120*01	IGKV17-121*01	IGKV14-100*01	IGKV17-121*01	IGKV17-121*01	IGKV14-100*01	IGKV4-70*01		IGKV9-124*01	IGKV17-121*01
	IGKV9-120*01	IGKV14-100*01	IGKV9-120*01	IGKV14-100*01	IGKV9-120*01	IGKV8-30*01	IGKV9-120*01 F	IGKV9-120*01 F	IGKV14-100*01	IGKV9-120*01	IGKV14-100*01	IGKV17-121*01	IGKV9-120*01	IGKV17-121*01	IGKV17-121*01	IGKV14-100*01	IGKV4-70*01		IGKV9-124*01	IGKV17-121*01
	IGKV9-120*01	IGKV14-100*01	IGKV9-120*01	IGKV14-100*01	IGKV9-120*01	IGKV9-120*01	IGKV9-120*01 F	IGKV9-120*01 F	IGKV14-100*01	IGKV9-120*01	IGKV14-100*01	IGKV17-121*01	IGKV14-100*01	IGKV17-121*01	IGKV17-121*01	IGKV14-100*01	IGKV4-70*01		IGKV9-124*01	IGKV17-121*01
	IGKV9-120*01	IGKV14-100*01	IGKV9-120*01	IGKV14-100*01	IGKV9-120*01	IGKV8-30*01	IGKV9-120*01 F	IGKV9-120*01 F	IGKV14-100*01	IGKV14-100*01	IGKV14-100*01	IGKV17-121*01	IGKV9-120*01	IGKV17-121*01	IGKV17-121*01	IGKV14-100*01	IGKV4-70*01		IGKV9-124*01	IGKV17-121*01
	IGKV9-120*01	IGKV14-100*01	IGKV9-120*01	IGKV14-100*01	IGKV9-120*01	IGKV8-30*01	IGKV9-120*01 F	IGKV9-120*01 F	IGKV14-100*01	IGKV9-120*01	IGKV14-100*01	IGKV17-121*01	IGKV14-100*01	IGKV17-121*01	IGKV17-121*01	IGKV14-100*01	IGKV4-70*01		IGKV9-124*01	IGKV17-121*01
	IGKV9-120*01	IGKV14-100*01	IGKV9-120*01	IGKV14-100*01	IGKV9-120*01	IGKV8-30*01	IGKV9-120*01 F	IGKV14-111*01 F	IGKV14-100*01	IGKV9-120*01	IGKV14-100*01	IGKV17-121*01	IGKV14-100*01	IGKV17-121*01	IGKV4-91*01	IGKV14-100*01	IGKV4-70*01		IGKV9-124*01	IGKV17-121*01
	IGKV9-120*01	IGKV14-100*01	IGKV9-120*01	IGKV14-100*01	IGKV9-120*01	IGKV8-30*01	IGKV9-120*01 F	IGKV9-120*01 F	IGKV14-100*01	IGKV9-120*01	IGKV9-120*01	IGKV17-121*01	IGKV14-100*01	IGKV17-121*01	IGKV4-91*01	IGKV14-100*01	IGKV4-70*01		IGKV9-124*01	IGKV17-121*01
	IGKV9-120*01	IGKV14-100*01	IGKV9-120*01	IGKV14-100*01	IGKV9-120*01	IGKV8-30*01	IGKV9-120*01 F	IGKV9-120*01 F	IGKV14-100*01	IGKV9-120*01	IGKV9-120*01	IGKV17-121*01	IGKV14-100*01	IGKV17-121*01	IGKV17-121*01	IGKV14-100*01	IGKV4-70*01		IGKV9-124*01	IGKV17-121*01
	IGKV9-120*01	IGKV14-100*01	IGKV9-120*01	IGKV14-100*01	IGKV9-120*01	IGKV8-30*01	IGKV9-120*01 F	IGKV14-111*01 F	IGKV14-100*01	IGKV9-120*01	IGKV9-120*01	IGKV17-121*01	IGKV9-120*01	IGKV17-121*01	IGKV17-121*01	IGKV14-100*01	IGKV4-70*01		IGKV9-124*01	IGKV17-121*01
	IGKV9-120*01	IGKV14-100*01	IGKV9-120*01	IGKV14-100*01	IGKV9-120*01	IGKV8-30*01	IGKV9-120*01 F	IGKV9-120*01 F	IGKV14-100*01	IGKV9-120*01	IGKV14-100*01	IGKV17-121*01	IGKV9-120*01	IGKV17-121*01	IGKV17-121*01	IGKV14-100*01	IGKV4-70*01		IGKV9-124*01	IGKV4-68*01
	IGKV9-120*01	IGKV14-100*01	IGKV9-120*01	IGKV14-100*01	IGKV9-120*01	IGKV8-30*01	IGKV9-120*01 F	IGKV14-111*01 F	IGKV14-100*01	IGKV9-120*01	IGKV9-120*01	IGKV17-121*01	IGKV14-100*01	IGKV17-121*01	IGKV17-121*01	IGKV14-100*01	IGKV4-70*01		IGKV9-124*01	IGKV17-121*01
	IGKV9-120*01	IGKV14-100*01	IGKV9-120*01	IGKV14-100*01	IGKV9-120*01	IGKV8-30*01	IGKV9-120*01 F	IGKV9-120*01 F	IGKV14-100*01	IGKV9-120*01	IGKV9-120*01	IGKV17-121*01	IGKV9-120*01	IGKV17-121*01	IGKV17-121*01	IGKV14-100*01	IGKV4-70*01		IGKV9-124*01	IGKV17-121*01
	IGKV9-120*01	IGKV14-100*01	IGKV9-120*01	IGKV14-100*01	IGKV9-120*01	IGKV8-30*01	IGKV9-120*01 F	IGKV9-120*01 F	IGKV14-100*01	IGKV9-120*01	IGKV9-120*01	IGKV17-121*01	IGKV14-100*01	IGKV17-121*01	IGKV4-91*01	IGKV14-100*01	IGKV4-70*01		IGKV9-124*01	IGKV17-121*01
	IGKV9-120*01	IGKV14-100*01	IGKV9-120*01	IGKV14-100*01	IGKV9-120*01	IGKV8-30*01	IGKV9-120*01 F	IGKV9-120*01 F	IGKV14-100*01	IGKV9-120*01	IGKV9-120*01	IGKV17-121*01	IGKV14-100*01	IGKV17-121*01	IGKV17-121*01	IGKV14-100*01	IGKV4-70*01		IGKV9-124*01	IGKV17-121*01
	IGKV9-120*01	IGKV14-100*01	IGKV9-120*01	IGKV14-100*01	IGKV9-120*01	IGKV9-120*01	IGKV9-120*01 F	IGKV4-91*01 F	IGKV14-100*01	IGKV9-120*01	IGKV9-120*01	IGKV17-121*01	IGKV14-100*01	IGKV17-121*01	IGKV17-121*01	IGKV14-100*01	IGKV4-70*01		IGKV9-124*01	IGKV17-121*01
	IGKV9-120*01	IGKV14-100*01	IGKV9-120*01	IGKV14-100*01	IGKV9-120*01	IGKV8-30*01	IGKV9-120*01 F	IGKV9-120*01 F	IGKV14-100*01	IGKV9-120*01	IGKV14-100*01	IGKV17-121*01	IGKV14-100*01	IGKV17-121*01	IGKV17-121*01	IGKV14-100*01	IGKV4-70*01		IGKV9-124*01	IGKV17-121*01
	IGKV9-120*01	IGKV14-100*01	IGKV9-120*01	IGKV14-100*01	IGKV9-120*01	IGKV8-30*01	IGKV9-120*01 F	IGKV9-120*01 F	IGKV14-100*01	IGKV9-120*01	IGKV14-100*01	IGKV17-121*01	IGKV14-100*01	IGKV17-121*01	IGKV17-121*01	IGKV14-100*01	IGKV4-70*01		IGKV9-124*01	IGKV17-121*01
	IGKV9-120*01	IGKV14-100*01	IGKV9-120*01	IGKV14-100*01	IGKV9-120*01	IGKV9-120*01	IGKV9-120*01 F	IGKV9-120*01 F	IGKV14-100*01	IGKV9-120*01	IGKV14-100*01	IGKV17-121*01	IGKV9-120*01	IGKV17-121*01	IGKV4-91*01	IGKV14-100*01	IGKV4-70*01		IGKV9-124*01	IGKV17-121*01
	IGKV9-120*01	IGKV14-100*01	IGKV9-120*01	IGKV14-100*01	IGKV9-120*01	IGKV9-120*01	IGKV9-120*01 F	IGKV9-120*01 F	IGKV14-100*01	IGKV9-120*01	IGKV14-100*01	IGKV17-121*01	IGKV9-120*01	IGKV17-121*01	IGKV17-121*01	IGKV14-100*01	IGKV4-70*01		IGKV9-124*01	IGKV17-121*01
	IGKV9-120*01	IGKV14-100*01	IGKV9-120*01	IGKV14-100*01	IGKV9-120*01	IGKV8-30*01	IGKV9-120*01 F	IGKV9-120*01 F	IGKV14-100*01	IGKV9-120*01	IGKV14-100*01	IGKV17-121*01	IGKV9-120*01	IGKV17-121*01	IGKV17-121*01	IGKV14-100*01	IGKV4-70*01		IGKV9-124*01	IGKV17-121*01
	IGKV9-120*01	IGKV14-100*01	IGKV9-120*01	IGKV14-100*01	IGKV9-120*01	IGKV9-120*01	IGKV9-120*01 F	IGKV9-120*01 F	IGKV14-100*01	IGKV9-120*01	IGKV14-100*01	IGKV17-121*01	IGKV14-100*01	IGKV17-121*01	IGKV4-91*01	IGKV14-100*01	IGKV4-70*01		IGKV9-124*01	IGKV17-121*01
	IGKV9-120*01	IGKV14-100*01	IGKV9-120*01	IGKV14-100*01	IGKV9-120*01	IGKV8-30*01	IGKV9-120*01 F	IGKV9-120*01 F	IGKV14-100*01	IGKV9-120*01	IGKV9-120*01	IGKV17-121*01	IGKV9-120*01	IGKV17-121*01	IGKV17-121*01	IGKV14-100*01	IGKV4-70*01		IGKV9-124*01	IGKV17-121*01
	IGKV9-120*01	IGKV14-100*01	IGKV9-120*01	IGKV14-100*01	IGKV9-120*01	IGKV8-30*01	IGKV9-120*01 F	IGKV9-120*01 F	IGKV14-100*01	IGKV9-120*01	IGKV14-100*01	IGKV17-121*01	IGKV9-120*01	IGKV17-121*01	IGKV17-121*01	IGKV14-100*01	IGKV4-70*01		IGKV9-124*01	IGKV17-121*01
	IGKV9-120*01	IGKV14-100*01	IGKV9-120*01	IGKV14-100*01	IGKV9-120*01	IGKV8-30*01	IGKV9-120*01 F	IGKV9-120*01 F	IGKV14-100*01	IGKV9-120*01	IGKV9-120*01	IGKV17-121*01	IGKV9-120*01	IGKV17-121*01	IGKV17-121*01	IGKV14-100*01	IGKV4-70*01		IGKV9-124*01	IGKV17-121*01
	IGKV9-120*01	IGKV14-100*01	IGKV9-120*01	IGKV14-100*01	IGKV9-120*01	IGKV9-120*01	IGKV9-120*01 F	IGKV9-120*01 F	IGKV14-100*01	IGKV9-120*01	IGKV14-100*01	IGKV17-121*01	IGKV9-120*01	IGKV17-121*01	IGKV4-91*01	IGKV14-100*01	IGKV4-70*01		IGKV9-124*01	IGKV17-121*01
	IGKV9-120*01	IGKV14-100*01	IGKV9-120*01	IGKV14-100*01	IGKV9-120*01	IGKV8-30*01	IGKV9-120*01 F	IGKV14-111*01 F	IGKV14-100*01	IGKV9-120*01	IGKV9-120*01	IGKV17-121*01	IGKV14-100*01	IGKV17-121*01	IGKV4-91*01	IGKV14-100*01	IGKV4-70*01		IGKV9-124*01	IGKV17-121*01
	IGKV9-120*01	IGKV14-100*01	IGKV9-120*01	IGKV14-100*01	IGKV9-120*01	IGKV8-30*01	IGKV9-120*01 F	IGKV14-111*01 F	IGKV14-100*01	IGKV9-120*01	IGKV14-100*01	IGKV17-121*01	IGKV9-120*01	IGKV17-121*01	IGKV4-91*01	IGKV14-100*01	IGKV4-70*01		IGKV9-124*01	IGKV17-121*01
	IGKV9-120*01	IGKV14-100*01	IGKV9-120*01	IGKV14-100*01	IGKV9-120*01	IGKV9-120*01	IGKV9-120*01 F	IGKV9-120*01 F	IGKV1-135*01	IGKV9-120*01	IGKV14-100*01	IGKV17-121*01	IGKV14-100*01	IGKV17-121*01	IGKV17-121*01	IGKV14-100*01	IGKV4-70*01		IGKV9-124*01	IGKV17-121*01
	IGKV9-120*01	IGKV14-100*01	IGKV9-120*01	IGKV14-100*01	IGKV9-120*01	IGKV9-120*01	IGKV9-120*01 F	IGKV9-120*01 F	IGKV14-100*01	IGKV9-120*01	IGKV9-120*01	IGKV17-121*01	IGKV14-100*01	IGKV17-121*01	IGKV17-121*01	IGKV14-100*01	IGKV4-70*01		IGKV9-124*01	IGKV17-121*01
	IGKV9-120*01	IGKV14-100*01	IGKV9-120*01	IGKV14-100*01	IGKV9-120*01	IGKV8-30*01	IGKV9-120*01 F	IGKV9-120*01 F	IGKV14-100*01	IGKV9-120*01	IGKV9-120*01	IGKV17-121*01	IGKV9-120*01	IGKV17-121*01	IGKV17-121*01	IGKV14-100*01	IGKV4-70*01		IGKV9-124*01	IGKV17-121*01
	IGKV9-120*01	IGKV14-100*01	IGKV9-120*01	IGKV14-100*01	IGKV9-120*01	IGKV8-30*01	IGKV9-120*01 F	IGKV9-120*01 F	IGKV14-100*01	IGKV9-120*01	IGKV9-120*01	IGKV17-121*01	IGKV14-100*01	IGKV17-121*01	IGKV17-121*01	IGKV14-100*01	IGKV4-70*01		IGKV9-124*01	IGKV17-121*01
	IGKV9-120*01	IGKV14-100*01	IGKV9-120*01	IGKV14-100*01	IGKV9-120*01	IGKV8-30*01	IGKV9-120*01 F	IGKV9-120*01 F	IGKV14-100*01	IGKV9-120*01	IGKV9-120*01	IGKV17-121*01	IGKV9-120*01	IGKV17-121*01	IGKV4-91*01	IGKV14-100*01	IGKV4-70*01		IGKV9-124*01	IGKV17-121*01
	IGKV9-120*01	IGKV14-100*01	IGKV9-120*01	IGKV14-100*01	IGKV9-120*01	IGKV8-30*01	IGKV9-120*01 F	IGKV14-111*01 F	IGKV14-100*01	IGKV9-120*01	IGKV14-100*01	IGKV17-121*01	IGKV14-100*01	IGKV17-121*01	IGKV17-121*01	IGKV14-100*01	IGKV4-70*01		IGKV9-124*01	IGKV17-121*01
	IGKV9-120*01	IGKV14-100*01	IGKV9-120*01	IGKV14-100*01	IGKV9-120*01	IGKV8-30*01	IGKV9-120*01 F	IGKV14-111*01 F	IGKV17-121*01	IGKV9-120*01	IGKV14-100*01	IGKV17-121*01	IGKV14-100*01	IGKV17-121*01	IGKV17-121*01	IGKV14-100*01	IGKV4-70*01		IGKV9-124*01	IGKV17-121*01
	IGKV9-120*01	IGKV14-100*01	IGKV9-120*01	IGKV14-100*01	IGKV9-120*01	IGKV8-30*01	IGKV9-120*01 F	IGKV9-120*01 F	IGKV14-100*01	IGKV9-120*01	IGKV14-100*01	IGKV17-121*01	IGKV14-100*01	IGKV17-121*01	IGKV17-121*01	IGKV14-100*01	IGKV4-70*01		IGKV9-124*01	IGKV17-121*01
	IGKV9-120*01	IGKV14-100*01	IGKV9-120*01	IGKV14-100*01	IGKV9-120*01	IGKV8-30*01	IGKV9-120*01 F	IGKV9-120*01 F	IGKV14-100*01	IGKV9-120*01	IGKV14-100*01	IGKV17-121*01	IGKV14-100*01	IGKV17-121*01	IGKV17-121*01	IGKV14-100*01	IGKV4-70*01		IGKV9-124*01	IGKV17-121*01
	IGKV9-120*01	IGKV14-100*01	IGKV9-120*01	IGKV14-100*01	IGKV9-120*01	IGKV8-30*01	IGKV9-120*01 F	IGKV14-111*01 F	IGKV14-100*01	IGKV9-120*01	IGKV9-120*01	IGKV17-121*01	IGKV9-120*01	IGKV17-121*01	IGKV17-121*01	IGKV14-100*01	IGKV4-70*01		IGKV9-124*01	IGKV17-121*01
	IGKV9-120*01	IGKV14-100*01	IGKV9-120*01	IGKV14-100*01	IGKV9-120*01	IGKV9-120*01	IGKV9-120*01 F	IGKV14-111*01 F	IGKV14-100*01	IGKV9-120*01	IGKV14-100*01	IGKV17-121*01	IGKV14-100*01	IGKV17-121*01	IGKV17-121*01	IGKV14-100*01	IGKV4-70*01		IGKV9-124*01	IGKV17-121*01
	IGKV9-120*01	IGKV14-100*01	IGKV9-120*01	IGKV14-100*01	IGKV9-120*01	IGKV8-30*01	IGKV9-120*01 F	IGKV9-120*01 F	IGKV14-100*01	IGKV9-120*01	IGKV9-120*01	IGKV17-121*01	IGKV14-100*01	IGKV17-121*01	IGKV17-121*01	IGKV14-100*01	IGKV4-70*01		IGKV9-124*01	IGKV17-121*01
	IGKV9-120*01	IGKV14-100*01	IGKV9-120*01	IGKV14-100*01	IGKV9-120*01	IGKV8-30*01	IGKV9-120*01 F	IGKV9-120*01 F	IGKV14-100*01	IGKV9-120*01	IGKV14-100*01	IGKV17-121*01	IGKV14-100*01	IGKV17-121*01	IGKV17-121*01	IGKV14-100*01	IGKV4-70*01		IGKV9-124*01	IGKV17-121*01
	IGKV9-120*01	IGKV14-100*01	IGKV9-120*01	IGKV14-100*01	IGKV9-120*01	IGKV8-30*01	IGKV9-120*01 F	IGKV9-120*01 F	IGKV17-121*01	IGKV9-120*01	IGKV9-120*01	IGKV17-121*01	IGKV14-100*01	IGKV17-121*01	IGKV17-121*01	IGKV14-100*01	IGKV4-70*01		IGKV9-124*01	IGKV17-121*01
	IGKV9-120*01	IGKV14-100*01	IGKV9-120*01	IGKV14-100*01	IGKV9-120*01	IGKV9-120*01	IGKV9-120*01 F	IGKV9-120*01 F	IGKV14-100*01	IGKV9-120*01	IGKV14-100*01	IGKV17-121*01	IGKV14-100*01	IGKV17-121*01	IGKV17-121*01	IGKV14-100*01	IGKV4-70*01		IGKV9-124*01	IGKV17-121*01
	IGKV9-120*01	IGKV14-100*01	IGKV9-120*01	IGKV14-100*01	IGKV9-120*01	IGKV9-120*01	IGKV9-120*01 F	IGKV9-120*01 F	IGKV17-121*01	IGKV9-120*01	IGKV14-100*01	IGKV17-121*01	IGKV14-100*01	IGKV17-121*01	IGKV17-121*01	IGKV14-100*01	IGKV4-70*01		IGKV9-124*01	IGKV17-121*01
	IGKV9-120*01	IGKV14-100*01	IGKV9-120*01	IGKV14-100*01	IGKV9-120*01	IGKV9-120*01	IGKV9-120*01 F	IGKV14-111*01 F	IGKV14-100*01	IGKV9-120*01	IGKV9-120*01	IGKV17-121*01	IGKV9-120*01	IGKV17-121*01	IGKV17-121*01	IGKV14-100*01	IGKV4-70*01		IGKV9-124*01	IGKV17-121*01
	IGKV9-120*01	IGKV14-100*01	IGKV9-120*01	IGKV14-100*01	IGKV9-120*01	IGKV8-30*01	IGKV9-120*01 F	IGKV14-111*01 F	IGKV1-135*01	IGKV9-120*01	IGKV14-100*01	IGKV17-121*01	IGKV14-100*01	IGKV17-121*01	IGKV17-121*01	IGKV14-100*01	IGKV4-70*01		IGKV9-124*01	IGKV17-121*01
	IGKV9-120*01	IGKV14-100*01	IGKV9-120*01	IGKV14-100*01	IGKV9-120*01	IGKV8-30*01	IGKV9-120*01 F	IGKV9-120*01 F	IGKV14-100*01	IGKV9-120*01	IGKV9-120*01	IGKV17-121*01	IGKV9-120*01	IGKV17-121*01	IGKV17-121*01	IGKV14-100*01	IGKV4-70*01		IGKV9-124*01	IGKV17-121*01
	IGKV9-120*01	IGKV14-100*01	IGKV9-120*01	IGKV14-100*01	IGKV9-120*01	IGKV8-30*01	IGKV9-120*01 F	IGKV9-120*01 F	IGKV14-100*01	IGKV9-120*01	IGKV14-100*01	IGKV17-121*01	IGKV14-100*01	IGKV17-121*01	IGKV4-91*01	IGKV14-100*01	IGKV4-70*01		IGKV9-124*01	IGKV17-121*01
	IGKV9-120*01	IGKV14-100*01	IGKV9-120*01	IGKV14-100*01	IGKV9-120*01	IGKV9-120*01	IGKV9-120*01 F	IGKV14-111*01 F	IGKV14-100*01	IGKV9-120*01	IGKV14-100*01	IGKV17-121*01	IGKV14-100*01	IGKV17-121*01	IGKV17-121*01	IGKV14-100*01	IGKV4-70*01		IGKV9-124*01	IGKV17-121*01
	IGKV9-120*01	IGKV14-100*01	IGKV9-120*01	IGKV14-100*01	IGKV9-120*01	IGKV8-30*01	IGKV9-120*01 F	IGKV9-120*01 F	IGKV14-100*01	IGKV9-120*01	IGKV14-100*01	IGKV17-121*01	IGKV14-100*01	IGKV17-121*01	IGKV4-91*01	IGKV14-100*01	IGKV4-70*01		IGKV9-124*01	IGKV17-121*01
	IGKV9-120*01	IGKV14-100*01	IGKV9-120*01	IGKV14-100*01	IGKV9-120*01	IGKV9-120*01	IGKV9-120*01 F	IGKV9-120*01 F	IGKV14-100*01	IGKV9-120*01	IGKV14-100*01	IGKV17-121*01	IGKV9-120*01	IGKV17-121*01	IGKV17-121*01	IGKV14-100*01	IGKV4-70*01		IGKV9-124*01	IGKV17-121*01
	IGKV9-120*01	IGKV14-100*01	IGKV9-120*01	IGKV14-100*01	IGKV9-120*01	IGKV9-120*01	IGKV9-120*01 F	IGKV9-120*01 F	IGKV14-100*01	IGKV9-120*01	IGKV14-100*01	IGKV17-121*01	IGKV14-100*01	IGKV17-121*01	IGKV17-121*01	IGKV14-100*01	IGKV4-70*01		IGKV9-124*01	IGKV17-121*01
	IGKV9-120*01	IGKV14-100*01	IGKV9-120*01	IGKV14-100*01	IGKV9-120*01	IGKV8-30*01	IGKV9-120*01 F	IGKV9-120*01 F	IGKV14-100*01	IGKV9-120*01	IGKV14-100*01	IGKV17-121*01	IGKV14-100*01	IGKV17-121*01	IGKV17-121*01	IGKV14-100*01	IGKV4-70*01		IGKV9-124*01	IGKV17-121*01
	IGKV9-120*01	IGKV14-100*01	IGKV9-120*01	IGKV14-100*01	IGKV9-120*01	IGKV8-30*01	IGKV9-120*01 F	IGKV14-111*01 F	IGKV14-100*01	IGKV9-120*01	IGKV14-100*01	IGKV17-121*01	IGKV14-100*01	IGKV17-121*01	IGKV4-91*01	IGKV14-100*01	IGKV4-70*01		IGKV9-124*01	IGKV17-121*01
	IGKV9-120*01	IGKV14-100*01	IGKV9-120*01	IGKV14-100*01	IGKV9-120*01	IGKV9-120*01	IGKV9-120*01 F	IGKV9-120*01 F	IGKV14-100*01	IGKV9-120*01	IGKV14-100*01	IGKV17-121*01	IGKV14-100*01	IGKV17-121*01	IGKV17-121*01	IGKV14-100*01	IGKV4-70*01		IGKV9-124*01	IGKV17-121*01
	IGKV9-120*01	IGKV14-100*01	IGKV9-120*01	IGKV14-100*01	IGKV9-120*01	IGKV8-30*01	IGKV9-120*01 F	IGKV9-120*01 F	IGKV14-100*01	IGKV9-120*01	IGKV9-120*01	IGKV17-121*01	IGKV14-100*01	IGKV17-121*01	IGKV17-121*01	IGKV14-100*01	IGKV4-70*01		IGKV9-124*01	IGKV17-121*01
	IGKV9-120*01	IGKV14-100*01	IGKV9-120*01	IGKV14-100*01	IGKV9-120*01	IGKV8-30*01	IGKV9-120*01 F	IGKV9-120*01 F	IGKV14-100*01	IGKV9-120*01	IGKV14-100*01	IGKV17-121*01	IGKV14-100*01	IGKV17-121*01	IGKV17-121*01	IGKV14-100*01	IGKV4-70*01		IGKV9-124*01	IGKV17-121*01
	IGKV9-120*01	IGKV14-100*01	IGKV9-120*01	IGKV14-100*01	IGKV9-120*01	IGKV8-30*01	IGKV9-120*01 F	IGKV9-120*01 F	IGKV14-100*01	IGKV9-120*01	IGKV14-100*01	IGKV17-121*01	IGKV14-100*01	IGKV17-121*01	IGKV17-121*01	IGKV14-100*01	IGKV4-70*01		IGKV9-124*01	IGKV17-121*01
	IGKV9-120*01	IGKV14-100*01	IGKV9-120*01	IGKV14-100*01	IGKV9-120*01	IGKV8-30*01	IGKV9-120*01 F	IGKV9-120*01 F	IGKV14-100*01	IGKV9-120*01	IGKV9-120*01	IGKV17-121*01	IGKV14-100*01	IGKV17-121*01	IGKV17-121*01	IGKV14-100*01	IGKV4-70*01		IGKV9-124*01	IGKV17-121*01
	IGKV9-120*01	IGKV14-100*01	IGKV9-120*01	IGKV14-100*01	IGKV9-120*01	IGKV9-120*01	IGKV9-120*01 F	IGKV9-120*01 F	IGKV14-100*01	IGKV9-120*01	IGKV14-100*01	IGKV17-121*01	IGKV14-100*01	IGKV17-121*01	IGKV4-91*01	IGKV14-100*01	IGKV4-70*01		IGKV9-124*01	IGKV17-121*01
	IGKV9-120*01	IGKV14-100*01	IGKV9-120*01	IGKV14-100*01	IGKV9-120*01	IGKV9-120*01	IGKV9-120*01 F	IGKV9-120*01 F	IGKV14-100*01	IGKV9-120*01	IGKV14-100*01	IGKV17-121*01	IGKV14-100*01	IGKV17-121*01	IGKV17-121*01	IGKV14-100*01	IGKV4-70*01		IGKV9-124*01	IGKV17-121*01
	IGKV9-120*01	IGKV14-100*01	IGKV9-120*01	IGKV14-100*01	IGKV9-120*01	IGKV8-30*01	IGKV9-120*01 F	IGKV9-120*01 F	IGKV14-100*01	IGKV9-120*01	IGKV14-100*01	IGKV17-121*01	IGKV14-100*01	IGKV17-121*01	IGKV4-91*01	IGKV14-100*01	IGKV4-70*01		IGKV9-124*01	IGKV17-121*01
	IGKV9-120*01	IGKV14-100*01	IGKV9-120*01	IGKV14-100*01	IGKV9-120*01	IGKV8-30*01	IGKV9-120*01 F	IGKV9-120*01 F	IGKV14-100*01	IGKV9-120*01	IGKV14-100*01	IGKV17-121*01	IGKV14-100*01	IGKV17-121*01	IGKV4-91*01	IGKV14-100*01	IGKV4-70*01		IGKV9-124*01	IGKV17-121*01
	IGKV9-120*01	IGKV14-100*01	IGKV9-120*01	IGKV14-100*01	IGKV9-120*01	IGKV9-120*01	IGKV9-120*01 F	IGKV9-120*01 F	IGKV14-100*01	IGKV9-120*01	IGKV14-100*01	IGKV17-121*01	IGKV14-100*01	IGKV17-121*01	IGKV17-121*01	IGKV14-100*01	IGKV4-70*01		IGKV9-124*01	IGKV17-121*01
	IGKV9-120*01	IGKV14-100*01	IGKV9-120*01	IGKV14-100*01	IGKV9-120*01	IGKV9-120*01	IGKV9-120*01 F	IGKV9-120*01 F	IGKV14-100*01	IGKV9-120*01	IGKV14-100*01	IGKV17-121*01	IGKV14-100*01	IGKV17-121*01	IGKV4-91*01	IGKV14-100*01	IGKV4-70*01		IGKV9-124*01	IGKV17-121*01
	IGKV9-120*01	IGKV14-100*01	IGKV9-120*01	IGKV14-100*01	IGKV9-120*01	IGKV8-30*01	IGKV9-120*01 F	IGKV9-120*01 F	IGKV4-57*01	IGKV9-120*01	IGKV14-100*01	IGKV17-121*01	IGKV9-120*01	IGKV17-121*01	IGKV4-91*01	IGKV14-100*01	IGKV4-70*01		IGKV9-124*01	IGKV17-121*01
	IGKV9-120*01	IGKV14-100*01	IGKV9-120*01	IGKV14-100*01	IGKV9-120*01	IGKV9-120*01	IGKV9-120*01 F	IGKV9-120*01 F	IGKV14-100*01	IGKV9-120*01	IGKV14-100*01	IGKV17-121*01	IGKV9-120*01	IGKV17-121*01	IGKV17-121*01	IGKV14-100*01	IGKV4-70*01		IGKV9-124*01	IGKV17-121*01
	IGKV9-120*01	IGKV14-100*01	IGKV9-120*01	IGKV14-100*01	IGKV9-120*01	IGKV9-120*01	IGKV9-120*01 F	IGKV9-120*01 F	IGKV14-100*01	IGKV9-120*01	IGKV14-100*01	IGKV17-121*01	IGKV9-120*01	IGKV17-121*01	IGKV17-121*01	IGKV14-100*01	IGKV4-70*01		IGKV9-124*01	IGKV17-121*01
	IGKV9-120*01	IGKV14-100*01	IGKV9-120*01	IGKV14-100*01	IGKV9-120*01	IGKV9-120*01	IGKV9-120*01 F	IGKV9-120*01 F	IGKV14-100*01	IGKV9-120*01	IGKV9-120*01	IGKV17-121*01	IGKV14-100*01	IGKV17-121*01	IGKV17-121*01	IGKV14-100*01	IGKV4-70*01		IGKV9-124*01	IGKV17-121*01
	IGKV9-120*01	IGKV14-100*01	IGKV9-120*01	IGKV14-100*01	IGKV9-120*01	IGKV8-30*01	IGKV9-120*01 F	IGKV14-111*01 F	IGKV3-4*01	IGKV9-120*01	IGKV14-100*01	IGKV17-121*01	IGKV9-120*01	IGKV17-121*01	IGKV4-91*01	IGKV14-100*01	IGKV4-70*01		IGKV9-124*01	IGKV17-121*01
	IGKV9-120*01	IGKV14-100*01	IGKV9-120*01	IGKV14-100*01	IGKV9-120*01	IGKV8-30*01	IGKV9-120*01 F	IGKV9-120*01 F	IGKV14-100*01	IGKV9-120*01	IGKV14-100*01	IGKV17-121*01	IGKV14-100*01	IGKV17-121*01	IGKV17-121*01	IGKV14-100*01	IGKV4-70*01		IGKV9-124*01	IGKV17-121*01
	IGKV9-120*01	IGKV14-100*01	IGKV9-120*01	IGKV14-100*01	IGKV9-120*01	IGKV9-120*01	IGKV9-120*01 F	IGKV9-120*01 F	IGKV14-100*01	IGKV9-120*01	IGKV14-100*01	IGKV17-121*01	IGKV14-100*01	IGKV17-121*01	IGKV4-91*01	IGKV14-100*01	IGKV4-70*01		IGKV9-124*01	IGKV17-121*01
	IGKV9-120*01	IGKV14-100*01	IGKV9-120*01	IGKV14-100*01	IGKV9-120*01	IGKV9-120*01	IGKV9-120*01 F	IGKV9-120*01 F	IGKV14-100*01	IGKV9-120*01	IGKV14-100*01	IGKV17-121*01	IGKV14-100*01	IGKV17-121*01	IGKV4-91*01	IGKV14-100*01	IGKV4-70*01		IGKV9-124*01	IGKV4-68*01
	IGKV9-120*01	IGKV14-100*01	IGKV9-120*01	IGKV14-100*01	IGKV9-120*01	IGKV8-30*01	IGKV9-120*01 F	IGKV9-120*01 F	IGKV14-100*01	IGKV9-120*01	IGKV14-100*01	IGKV17-121*01	IGKV14-100*01	IGKV17-121*01	IGKV17-121*01	IGKV14-100*01	IGKV4-70*01		IGKV9-124*01	IGKV4-68*01
	IGKV9-120*01	IGKV14-100*01	IGKV9-120*01	IGKV14-100*01	IGKV9-120*01	IGKV9-120*01	IGKV9-120*01 F	IGKV9-120*01 F	IGKV14-100*01	IGKV9-120*01	IGKV14-100*01	IGKV17-121*01	IGKV14-100*01	IGKV17-121*01	IGKV17-121*01	IGKV14-100*01	IGKV4-70*01		IGKV9-124*01	IGKV17-121*01
	IGKV9-120*01	IGKV14-100*01	IGKV9-120*01	IGKV14-100*01	IGKV9-120*01	IGKV8-30*01	IGKV9-120*01 F	IGKV9-120*01 F	IGKV17-121*01	IGKV9-120*01	IGKV14-100*01	IGKV17-121*01	IGKV14-100*01	IGKV17-121*01	IGKV17-121*01	IGKV14-100*01	IGKV4-70*01		IGKV9-124*01	IGKV17-121*01
	IGKV9-120*01	IGKV14-100*01	IGKV9-120*01	IGKV14-100*01	IGKV9-120*01	IGKV8-30*01	IGKV9-120*01 F	IGKV9-120*01 F	IGKV14-100*01	IGKV9-120*01	IGKV14-100*01	IGKV17-121*01	IGKV14-100*01	IGKV17-121*01	IGKV4-91*01	IGKV14-100*01	IGKV4-70*01		IGKV9-124*01	IGKV17-121*01
	IGKV9-120*01	IGKV14-100*01	IGKV9-120*01	IGKV14-100*01	IGKV9-120*01	IGKV9-120*01	IGKV9-120*01 F	IGKV14-111*01 F	IGKV14-100*01	IGKV9-120*01	IGKV9-120*01	IGKV17-121*01	IGKV14-100*01	IGKV17-121*01	IGKV17-121*01	IGKV14-100*01	IGKV4-70*01		IGKV9-124*01	IGKV17-121*01
	IGKV9-120*01	IGKV14-100*01	IGKV9-120*01	IGKV14-100*01	IGKV9-120*01	IGKV9-120*01	IGKV9-120*01 F	IGKV9-120*01 F	IGKV14-100*01	IGKV9-120*01	IGKV9-120*01	IGKV17-121*01	IGKV14-100*01	IGKV17-121*01	IGKV17-121*01	IGKV14-100*01	IGKV4-70*01		IGKV9-124*01	IGKV17-121*01
	IGKV9-120*01	IGKV14-100*01	IGKV9-120*01	IGKV14-100*01	IGKV9-120*01	IGKV8-30*01	IGKV9-120*01 F	IGKV9-120*01 F	IGKV14-100*01	IGKV9-120*01	IGKV9-120*01	IGKV17-121*01	IGKV9-120*01	IGKV17-121*01	IGKV17-121*01	IGKV14-100*01	IGKV4-70*01		IGKV9-124*01	IGKV17-121*01
	IGKV9-120*01	IGKV14-100*01	IGKV9-120*01	IGKV14-100*01	IGKV9-120*01	IGKV8-30*01	IGKV9-120*01 F	IGKV9-120*01 F	IGKV4-91*01	IGKV9-120*01	IGKV14-100*01	IGKV17-121*01	IGKV14-100*01	IGKV17-121*01	IGKV17-121*01	IGKV14-100*01	IGKV4-70*01		IGKV9-124*01	IGKV17-121*01
	IGKV9-120*01	IGKV14-100*01	IGKV9-120*01	IGKV14-100*01	IGKV9-120*01	IGKV9-120*01	IGKV9-120*01 F	IGKV9-120*01 F	IGKV4-50*01	IGKV9-120*01	IGKV9-120*01	IGKV17-121*01	IGKV14-100*01	IGKV17-121*01	IGKV17-121*01	IGKV14-100*01	IGKV4-70*01		IGKV9-124*01	IGKV17-121*01
	IGKV9-120*01	IGKV14-100*01	IGKV9-120*01	IGKV14-100*01	IGKV9-120*01	IGKV8-30*01	IGKV9-120*01 F	IGKV16-104*01 F	IGKV14-100*01	IGKV9-120*01	IGKV9-120*01	IGKV17-121*01	IGKV14-100*01	IGKV17-121*01	IGKV17-121*01	IGKV14-100*01	IGKV4-70*01		IGKV9-124*01	IGKV17-121*01
	IGKV9-120*01	IGKV14-100*01	IGKV9-120*01	IGKV14-100*01	IGKV9-120*01	IGKV9-120*01	IGKV9-120*01 F	IGKV1-135*01 F	IGKV14-100*01	IGKV9-120*01	IGKV9-120*01	IGKV17-121*01	IGKV14-100*01	IGKV17-121*01	IGKV17-121*01	IGKV14-100*01	IGKV4-70*01		IGKV9-124*01	IGKV17-121*01
	IGKV9-120*01	IGKV14-100*01	IGKV9-120*01	IGKV14-100*01	IGKV9-120*01	IGKV8-30*01	IGKV9-120*01 F	IGKV9-120*01 F	IGKV14-100*01	IGKV9-120*01	IGKV14-100*01	IGKV17-121*01	IGKV14-100*01	IGKV17-121*01	IGKV17-121*01	IGKV14-100*01	IGKV4-70*01		IGKV9-124*01	IGKV17-121*01
	IGKV9-120*01	IGKV14-100*01	IGKV9-120*01	IGKV14-100*01	IGKV9-120*01	IGKV8-30*01	IGKV9-120*01 F	IGKV9-120*01 F	IGKV14-100*01	IGKV9-120*01	IGKV9-120*01	IGKV17-121*01	IGKV14-100*01	IGKV17-121*01	IGKV17-121*01	IGKV14-100*01	IGKV4-70*01		IGKV9-124*01	IGKV17-121*01
	IGKV9-120*01	IGKV14-100*01	IGKV9-120*01	IGKV14-100*01	IGKV9-120*01	IGKV9-120*01	IGKV9-120*01 F	IGKV14-111*01 F	IGKV14-100*01	IGKV9-120*01	IGKV14-100*01	IGKV17-121*01	IGKV14-100*01	IGKV17-121*01	IGKV4-91*01	IGKV14-100*01	IGKV4-70*01		IGKV9-124*01	IGKV17-121*01
	IGKV9-120*01	IGKV14-100*01	IGKV9-120*01	IGKV14-100*01	IGKV9-120*01	IGKV9-120*01	IGKV9-120*01 F	IGKV9-120*01 F	IGKV14-100*01	IGKV9-120*01	IGKV14-100*01	IGKV17-121*01	IGKV9-120*01	IGKV17-121*01	IGKV4-91*01	IGKV14-100*01	IGKV4-70*01		IGKV9-124*01	IGKV17-121*01
	IGKV9-120*01	IGKV14-100*01	IGKV9-120*01	IGKV14-100*01	IGKV9-120*01	IGKV9-120*01	IGKV9-120*01 F	IGKV9-120*01 F	IGKV4-50*01	IGKV9-120*01	IGKV9-120*01	IGKV17-121*01	IGKV14-100*01	IGKV17-121*01	IGKV4-91*01	IGKV14-100*01	IGKV4-70*01		IGKV9-124*01	IGKV17-121*01
	IGKV9-120*01	IGKV14-100*01	IGKV9-120*01	IGKV14-100*01	IGKV9-120*01	IGKV8-30*01	IGKV9-120*01 F	IGKV1-135*01 F	IGKV14-100*01	IGKV9-120*01	IGKV9-120*01	IGKV17-121*01	IGKV14-100*01	IGKV17-121*01	IGKV4-91*01	IGKV14-100*01	IGKV4-70*01		IGKV9-124*01	IGKV17-121*01
	IGKV9-120*01	IGKV14-100*01	IGKV9-120*01	IGKV14-100*01	IGKV9-120*01	IGKV8-30*01	IGKV9-120*01 F	IGKV9-120*01 F	IGKV14-100*01	IGKV9-120*01	IGKV9-120*01	IGKV17-121*01	IGKV9-120*01	IGKV17-121*01	IGKV17-121*01	IGKV14-100*01	IGKV4-70*01		IGKV9-124*01	IGKV17-121*01
	IGKV9-120*01	IGKV14-100*01	IGKV9-120*01	IGKV14-100*01	IGKV9-120*01	IGKV9-120*01	IGKV9-120*01 F	IGKV14-111*01 F	IGKV14-100*01	IGKV9-120*01	IGKV14-100*01	IGKV17-121*01	IGKV14-100*01	IGKV17-121*01	IGKV17-121*01	IGKV14-100*01	IGKV4-70*01		IGKV9-124*01	IGKV17-121*01
	IGKV9-120*01	IGKV14-100*01	IGKV9-120*01	IGKV14-100*01	IGKV9-120*01	IGKV8-30*01	IGKV9-120*01 F	IGKV9-120*01 F	IGKV1-135*01	IGKV9-120*01	IGKV9-120*01	IGKV17-121*01	IGKV14-100*01	IGKV17-121*01	IGKV17-121*01	IGKV14-100*01	IGKV4-70*01		IGKV9-124*01	IGKV17-121*01
	IGKV9-120*01	IGKV14-100*01	IGKV9-120*01	IGKV14-100*01	IGKV9-120*01	IGKV8-30*01	IGKV9-120*01 F	IGKV9-120*01 F	IGKV14-100*01	IGKV9-120*01	IGKV14-100*01	IGKV17-121*01	IGKV9-120*01	IGKV17-121*01	IGKV17-121*01	IGKV14-100*01	IGKV4-70*01		IGKV9-124*01	IGKV17-121*01
	IGKV9-120*01	IGKV14-100*01	IGKV9-120*01	IGKV14-100*01	IGKV9-120*01	IGKV8-30*01	IGKV9-120*01 F	IGKV9-120*01 F	IGKV14-100*01	IGKV9-120*01	IGKV14-100*01	IGKV17-121*01	IGKV14-100*01	IGKV17-121*01	IGKV17-121*01	IGKV14-100*01	IGKV4-70*01		IGKV9-124*01	IGKV17-121*01
	IGKV9-120*01	IGKV14-100*01	IGKV9-120*01	IGKV14-100*01	IGKV9-120*01	IGKV9-120*01	IGKV9-120*01 F	IGKV9-120*01 F	IGKV17-121*01	IGKV9-120*01	IGKV9-120*01	IGKV17-121*01	IGKV9-120*01	IGKV17-121*01	IGKV17-121*01	IGKV14-100*01	IGKV4-70*01		IGKV9-124*01	IGKV17-121*01
	IGKV9-120*01	IGKV14-100*01	IGKV9-120*01	IGKV14-100*01	IGKV9-120*01	IGKV8-30*01	IGKV9-120*01 F	IGKV9-120*01 F	IGKV14-100*01	IGKV9-120*01	IGKV14-100*01	IGKV17-121*01	IGKV14-100*01	IGKV17-121*01	IGKV17-121*01	IGKV14-100*01	IGKV4-70*01		IGKV9-124*01	IGKV17-121*01
	IGKV9-120*01	IGKV14-100*01	IGKV9-120*01	IGKV14-100*01	IGKV9-120*01	IGKV9-120*01	IGKV9-120*01 F	IGKV14-111*01 F	IGKV14-100*01	IGKV9-120*01	IGKV9-120*01	IGKV17-121*01	IGKV14-100*01	IGKV17-121*01	IGKV17-121*01	IGKV14-100*01	IGKV4-70*01		IGKV9-124*01	IGKV17-121*01
	IGKV9-120*01	IGKV14-100*01	IGKV9-120*01	IGKV14-100*01	IGKV9-120*01	IGKV8-30*01	IGKV9-120*01 F	IGKV14-111*01 F	IGKV14-100*01	IGKV9-120*01	IGKV9-120*01	IGKV17-121*01	IGKV14-100*01	IGKV17-121*01	IGKV17-121*01	IGKV14-100*01	IGKV4-70*01		IGKV9-124*01	IGKV17-121*01
	IGKV9-120*01	IGKV14-100*01	IGKV9-120*01	IGKV14-100*01	IGKV9-120*01	IGKV8-30*01	IGKV9-120*01 F	IGKV9-120*01 F	IGKV14-100*01	IGKV9-120*01	IGKV14-100*01	IGKV17-121*01	IGKV14-100*01	IGKV17-121*01	IGKV4-91*01	IGKV14-100*01	IGKV4-70*01		IGKV9-124*01	IGKV17-121*01
	IGKV9-120*01	IGKV14-100*01	IGKV9-120*01	IGKV14-100*01	IGKV9-120*01	IGKV9-120*01	IGKV9-120*01 F	IGKV14-111*01 F	IGKV17-121*01	IGKV9-120*01	IGKV9-120*01	IGKV17-121*01	IGKV14-100*01	IGKV17-121*01	IGKV4-91*01	IGKV14-100*01	IGKV4-70*01		IGKV9-124*01	IGKV17-121*01
	IGKV9-120*01	IGKV14-100*01	IGKV9-120*01	IGKV14-100*01	IGKV9-120*01	IGKV9-120*01	IGKV9-120*01 F	IGKV9-120*01 F	IGKV14-100*01	IGKV9-120*01	IGKV9-120*01	IGKV17-121*01	IGKV14-100*01	IGKV17-121*01	IGKV4-91*01	IGKV14-100*01	IGKV4-70*01		IGKV9-124*01	IGKV17-121*01
	IGKV9-120*01	IGKV14-100*01	IGKV9-120*01	IGKV14-100*01	IGKV9-120*01	IGKV9-120*01	IGKV9-120*01 F	IGKV14-111*01 F	IGKV14-100*01	IGKV9-120*01	IGKV14-100*01	IGKV17-121*01	IGKV9-120*01	IGKV17-121*01	IGKV17-121*01	IGKV14-100*01	IGKV4-70*01		IGKV9-124*01	IGKV17-121*01
	IGKV9-120*01	IGKV14-100*01	IGKV9-120*01	IGKV14-100*01	IGKV9-120*01	IGKV8-30*01	IGKV9-120*01 F	IGKV9-120*01 F	IGKV14-100*01	IGKV9-120*01	IGKV9-120*01	IGKV17-121*01	IGKV9-120*01	IGKV17-121*01	IGKV17-121*01	IGKV14-100*01	IGKV4-70*01		IGKV9-124*01	IGKV17-121*01
	IGKV9-120*01	IGKV14-100*01	IGKV9-120*01	IGKV14-100*01	IGKV9-120*01	IGKV8-30*01	IGKV9-120*01 F	IGKV9-120*01 F	IGKV14-100*01	IGKV9-120*01	IGKV14-100*01	IGKV17-121*01	IGKV14-100*01	IGKV17-121*01	IGKV17-121*01	IGKV14-100*01	IGKV4-70*01		IGKV9-124*01	IGKV17-121*01
	IGKV9-120*01	IGKV14-100*01	IGKV9-120*01	IGKV14-100*01	IGKV9-120*01	IGKV8-30*01	IGKV9-120*01 F	IGKV16-104*01 F	IGKV17-121*01	IGKV9-120*01	IGKV14-100*01	IGKV17-121*01	IGKV14-100*01	IGKV17-121*01	IGKV17-121*01	IGKV14-100*01	IGKV4-70*01		IGKV9-124*01	IGKV17-121*01
	IGKV9-120*01	IGKV14-100*01	IGKV9-120*01	IGKV14-100*01	IGKV9-120*01	IGKV9-120*01	IGKV9-120*01 F	IGKV9-120*01 F	IGKV14-100*01	IGKV9-120*01	IGKV9-120*01	IGKV17-121*01	IGKV9-120*01	IGKV17-121*01	IGKV17-121*01	IGKV14-100*01	IGKV4-70*01		IGKV9-124*01	IGKV17-121*01
	IGKV9-120*01	IGKV14-100*01	IGKV9-120*01	IGKV14-100*01	IGKV9-120*01	IGKV9-120*01	IGKV9-120*01 F	IGKV14-111*01 F	IGKV14-100*01	IGKV9-120*01	IGKV14-100*01	IGKV17-121*01	IGKV14-100*01	IGKV17-121*01	IGKV4-91*01	IGKV14-100*01	IGKV4-70*01		IGKV9-124*01	IGKV17-121*01
	IGKV9-120*01	IGKV14-100*01	IGKV9-120*01	IGKV14-100*01	IGKV9-120*01	IGKV8-30*01	IGKV9-120*01 F	IGKV9-120*01 F	IGKV14-100*01	IGKV9-120*01	IGKV9-120*01	IGKV17-121*01	IGKV14-100*01	IGKV17-121*01	IGKV4-91*01	IGKV14-100*01	IGKV4-70*01		IGKV9-124*01	IGKV17-121*01
	IGKV9-120*01	IGKV14-100*01	IGKV9-120*01	IGKV14-100*01	IGKV9-120*01	IGKV8-30*01	IGKV9-120*01 F	IGKV9-120*01 F	IGKV14-100*01	IGKV9-120*01	IGKV14-100*01	IGKV17-121*01	IGKV14-100*01	IGKV17-121*01	IGKV17-121*01	IGKV14-100*01	IGKV4-70*01		IGKV9-124*01	IGKV17-121*01
	IGKV9-120*01	IGKV14-100*01	IGKV9-120*01	IGKV14-100*01	IGKV9-120*01	IGKV8-30*01	IGKV9-120*01 F	IGKV14-111*01 F	IGKV14-100*01	IGKV9-120*01	IGKV14-100*01	IGKV17-121*01	IGKV9-120*01	IGKV17-121*01	IGKV4-91*01	IGKV14-100*01	IGKV4-70*01		IGKV9-124*01	IGKV17-121*01
	IGKV9-120*01	IGKV14-100*01	IGKV9-120*01	IGKV14-100*01	IGKV9-120*01	IGKV8-30*01	IGKV9-120*01 F	IGKV1-135*01 F	IGKV14-100*01	IGKV9-120*01	IGKV9-120*01	IGKV17-121*01	IGKV14-100*01	IGKV17-121*01	IGKV17-121*01	IGKV14-100*01	IGKV4-70*01		IGKV9-124*01	IGKV17-121*01
	IGKV9-120*01	IGKV14-100*01	IGKV9-120*01	IGKV14-100*01	IGKV9-120*01	IGKV8-30*01	IGKV9-120*01 F	IGKV9-120*01 F	IGKV14-100*01	IGKV9-120*01	IGKV14-100*01	IGKV17-121*01	IGKV9-120*01	IGKV17-121*01	IGKV17-121*01	IGKV14-100*01	IGKV4-70*01		IGKV9-124*01	IGKV17-121*01
	IGKV9-120*01	IGKV14-100*01	IGKV9-120*01	IGKV14-100*01	IGKV9-120*01	IGKV8-30*01	IGKV9-120*01 F	IGKV17-121*01 F	IGKV14-100*01	IGKV9-120*01	IGKV14-100*01	IGKV17-121*01	IGKV14-100*01	IGKV17-121*01	IGKV17-121*01	IGKV14-100*01	IGKV4-70*01		IGKV9-124*01	IGKV17-121*01
	IGKV9-120*01	IGKV14-100*01	IGKV9-120*01	IGKV14-100*01	IGKV9-120*01	IGKV8-30*01	IGKV9-120*01 F	IGKV14-111*01 F	IGKV14-100*01	IGKV9-120*01	IGKV14-100*01	IGKV17-121*01	IGKV14-100*01	IGKV17-121*01	IGKV17-121*01	IGKV14-100*01	IGKV4-70*01		IGKV9-124*01	IGKV17-121*01
	IGKV9-120*01	IGKV14-100*01	IGKV9-120*01	IGKV14-100*01	IGKV9-120*01	IGKV9-120*01	IGKV9-120*01 F	IGKV9-120*01 F	IGKV14-100*01	IGKV9-120*01	IGKV9-120*01	IGKV17-121*01	IGKV14-100*01	IGKV17-121*01	IGKV4-91*01	IGKV14-100*01	IGKV4-70*01		IGKV9-124*01	IGKV17-121*01
	IGKV9-120*01	IGKV14-100*01	IGKV9-120*01	IGKV14-100*01	IGKV9-120*01	IGKV8-30*01	IGKV9-120*01 F	IGKV1-135*01 F	IGKV14-100*01	IGKV9-120*01	IGKV9-120*01	IGKV17-121*01	IGKV14-100*01	IGKV17-121*01	IGKV4-91*01	IGKV14-100*01	IGKV4-70*01		IGKV9-124*01	IGKV17-121*01
	IGKV9-120*01	IGKV14-100*01	IGKV9-120*01	IGKV14-100*01	IGKV9-120*01	IGKV9-120*01	IGKV9-120*01 F	IGKV9-120*01 F	IGKV1-135*01	IGKV9-120*01	IGKV9-120*01	IGKV17-121*01	IGKV14-100*01	IGKV17-121*01	IGKV4-91*01	IGKV14-100*01	IGKV4-70*01		IGKV9-124*01	IGKV17-121*01
	IGKV9-120*01	IGKV14-100*01	IGKV9-120*01	IGKV14-100*01	IGKV9-120*01	IGKV9-120*01	IGKV9-120*01 F	IGKV14-111*01 F	IGKV14-100*01	IGKV9-120*01	IGKV14-100*01	IGKV17-121*01	IGKV14-100*01	IGKV17-121*01	IGKV4-91*01	IGKV14-100*01	IGKV4-70*01		IGKV9-124*01	IGKV17-121*01
	IGKV9-120*01	IGKV14-100*01	IGKV9-120*01	IGKV14-100*01	IGKV9-120*01	IGKV8-30*01	IGKV9-120*01 F	IGKV9-120*01 F	IGKV14-100*01	IGKV9-120*01	IGKV9-120*01	IGKV17-121*01	IGKV9-120*01	IGKV17-121*01	IGKV17-121*01	IGKV14-100*01	IGKV4-70*01		IGKV9-124*01	IGKV17-121*01
	IGKV9-120*01	IGKV14-100*01	IGKV9-120*01	IGKV14-100*01	IGKV9-120*01	IGKV8-30*01	IGKV9-120*01 F	IGKV14-111*01 F	IGKV14-100*01	IGKV9-120*01	IGKV9-120*01	IGKV17-121*01	IGKV14-100*01	IGKV17-121*01	IGKV17-121*01	IGKV14-100*01	IGKV4-70*01		IGKV9-124*01	IGKV17-121*01
	IGKV9-120*01	IGKV14-100*01	IGKV9-120*01	IGKV14-100*01	IGKV9-120*01	IGKV9-120*01	IGKV9-120*01 F	IGKV9-120*01 F	IGKV14-100*01	IGKV9-120*01	IGKV14-100*01	IGKV17-121*01	IGKV9-120*01	IGKV17-121*01	IGKV17-121*01	IGKV14-100*01	IGKV4-70*01		IGKV9-124*01	IGKV17-121*01
	IGKV9-120*01	IGKV14-100*01	IGKV9-120*01	IGKV14-100*01	IGKV9-120*01	IGKV8-30*01	IGKV9-120*01 F	IGKV9-120*01 F	IGKV14-100*01	IGKV9-120*01	IGKV9-120*01	IGKV17-121*01	IGKV14-100*01	IGKV17-121*01	IGKV17-121*01	IGKV14-100*01	IGKV4-70*01		IGKV9-124*01	IGKV17-121*01
	IGKV9-120*01	IGKV14-100*01	IGKV9-120*01	IGKV14-100*01	IGKV9-120*01	IGKV9-120*01	IGKV9-120*01 F	IGKV9-120*01 F	IGKV14-100*01	IGKV9-120*01	IGKV9-120*01	IGKV17-121*01	IGKV14-100*01	IGKV17-121*01	IGKV17-121*01	IGKV14-100*01	IGKV4-70*01		IGKV9-124*01	IGKV17-121*01
	IGKV9-120*01	IGKV14-100*01	IGKV9-120*01	IGKV14-100*01	IGKV9-120*01	IGKV9-120*01	IGKV9-120*01 F	IGKV9-120*01 F	IGKV14-100*01	IGKV9-120*01	IGKV9-120*01	IGKV17-121*01	IGKV14-100*01	IGKV17-121*01	IGKV17-121*01	IGKV14-100*01	IGKV4-70*01		IGKV9-124*01	IGKV17-121*01
	IGKV9-120*01	IGKV14-100*01	IGKV9-120*01	IGKV14-100*01	IGKV9-120*01	IGKV8-30*01	IGKV9-120*01 F	IGKV8-19*01 F	IGKV14-100*01	IGKV9-120*01	IGKV14-100*01	IGKV17-121*01	IGKV14-100*01	IGKV17-121*01	IGKV17-121*01	IGKV14-100*01	IGKV4-70*01		IGKV9-124*01	IGKV17-121*01
	IGKV9-120*01	IGKV14-100*01	IGKV9-120*01	IGKV14-100*01	IGKV9-120*01	IGKV9-120*01	IGKV9-120*01 F	IGKV14-111*01 F	IGKV14-100*01	IGKV9-120*01	IGKV14-100*01	IGKV17-121*01	IGKV14-100*01	IGKV17-121*01	IGKV17-121*01	IGKV14-100*01	IGKV4-70*01		IGKV9-124*01	IGKV17-121*01
	IGKV9-120*01	IGKV14-100*01	IGKV9-120*01	IGKV14-100*01	IGKV9-120*01	IGKV8-30*01	IGKV9-120*01 F	IGKV9-120*01 F	IGKV14-100*01	IGKV9-120*01	IGKV14-100*01	IGKV17-121*01	IGKV9-120*01	IGKV17-121*01	IGKV17-121*01	IGKV14-100*01	IGKV4-70*01		IGKV9-124*01	IGKV17-121*01
	IGKV9-120*01	IGKV14-100*01	IGKV9-120*01	IGKV14-100*01	IGKV9-120*01	IGKV9-120*01	IGKV9-120*01 F	IGKV9-120*01 F	IGKV14-100*01	IGKV9-120*01	IGKV14-100*01	IGKV17-121*01	IGKV9-120*01	IGKV17-121*01	IGKV4-91*01	IGKV14-100*01	IGKV4-70*01		IGKV9-124*01	IGKV17-121*01
	IGKV9-120*01	IGKV14-100*01	IGKV9-120*01	IGKV14-100*01	IGKV9-120*01	IGKV8-30*01	IGKV9-120*01 F	IGKV9-120*01 F	IGKV14-100*01	IGKV9-120*01	IGKV14-100*01	IGKV17-121*01	IGKV14-100*01	IGKV17-121*01	IGKV17-121*01	IGKV14-100*01	IGKV4-70*01		IGKV9-124*01	IGKV17-121*01
	IGKV9-120*01	IGKV14-100*01	IGKV9-120*01	IGKV14-100*01	IGKV9-120*01	IGKV8-30*01	IGKV9-120*01 F	IGKV9-120*01 F	IGKV14-100*01	IGKV9-120*01	IGKV14-100*01	IGKV17-121*01	IGKV14-100*01	IGKV17-121*01	IGKV4-91*01	IGKV14-100*01	IGKV4-70*01		IGKV9-124*01	IGKV17-121*01
	IGKV9-120*01	IGKV14-100*01	IGKV9-120*01	IGKV14-100*01	IGKV9-120*01	IGKV9-120*01	IGKV9-120*01 F	IGKV9-120*01 F	IGKV14-100*01	IGKV9-120*01	IGKV14-100*01	IGKV17-121*01	IGKV14-100*01	IGKV17-121*01	IGKV17-121*01	IGKV14-100*01	IGKV4-70*01		IGKV9-124*01	IGKV17-121*01
	IGKV9-120*01	IGKV14-100*01	IGKV9-120*01	IGKV14-100*01	IGKV9-120*01	IGKV8-30*01	IGKV9-120*01 F	IGKV14-111*01 F	IGKV14-100*01	IGKV9-120*01	IGKV9-120*01	IGKV17-121*01	IGKV14-100*01	IGKV17-121*01	IGKV17-121*01	IGKV14-100*01	IGKV4-70*01		IGKV9-124*01	IGKV17-121*01
	IGKV9-120*01	IGKV14-100*01	IGKV9-120*01	IGKV14-100*01	IGKV9-120*01	IGKV8-30*01	IGKV9-120*01 F	IGKV9-120*01 F	IGKV14-100*01	IGKV9-120*01	IGKV9-120*01	IGKV17-121*01	IGKV9-120*01	IGKV17-121*01	IGKV17-121*01	IGKV14-100*01	IGKV4-70*01		IGKV9-124*01	IGKV17-121*01
	IGKV9-120*01	IGKV14-100*01	IGKV9-120*01	IGKV14-100*01	IGKV9-120*01	IGKV8-30*01	IGKV9-120*01 F	IGKV9-120*01 F	IGKV14-100*01	IGKV9-120*01	IGKV14-100*01	IGKV17-121*01	IGKV14-100*01	IGKV17-121*01	IGKV17-121*01	IGKV14-100*01	IGKV4-70*01		IGKV9-124*01	IGKV17-121*01
	IGKV9-120*01	IGKV14-100*01	IGKV9-120*01	IGKV14-100*01	IGKV9-120*01	IGKV9-120*01	IGKV9-120*01 F	IGKV9-120*01 F	IGKV14-100*01	IGKV9-120*01	IGKV9-120*01	IGKV17-121*01	IGKV9-120*01	IGKV17-121*01	IGKV17-121*01	IGKV14-100*01	IGKV4-70*01		IGKV9-124*01	IGKV17-121*01
	IGKV9-120*01	IGKV14-100*01	IGKV9-120*01	IGKV14-100*01	IGKV9-120*01	IGKV8-30*01	IGKV9-120*01 F	IGKV14-111*01 F	IGKV14-100*01	IGKV9-120*01	IGKV14-100*01	IGKV17-121*01	IGKV14-100*01	IGKV17-121*01	IGKV17-121*01	IGKV14-100*01	IGKV4-70*01		IGKV9-124*01	IGKV17-121*01
	IGKV9-120*01	IGKV14-100*01	IGKV9-120*01	IGKV14-100*01	IGKV9-120*01	IGKV9-120*01	IGKV9-120*01 F	IGKV14-111*01 F	IGKV14-100*01	IGKV9-120*01	IGKV14-100*01	IGKV17-121*01	IGKV14-100*01	IGKV17-121*01	IGKV4-91*01	IGKV14-100*01	IGKV4-70*01		IGKV9-124*01	IGKV17-121*01
	IGKV9-120*01	IGKV14-100*01	IGKV9-120*01	IGKV14-100*01	IGKV9-120*01	IGKV9-120*01	IGKV9-120*01 F	IGKV14-111*01 F	IGKV14-100*01	IGKV9-120*01	IGKV14-100*01	IGKV17-121*01	IGKV14-100*01	IGKV17-121*01	IGKV17-121*01	IGKV14-100*01	IGKV4-70*01		IGKV9-124*01	IGKV17-121*01
	IGKV9-120*01	IGKV14-100*01	IGKV9-120*01	IGKV14-100*01	IGKV9-120*01	IGKV9-120*01	IGKV9-120*01 F	IGKV9-120*01 F	IGKV14-100*01	IGKV9-120*01	IGKV14-100*01	IGKV17-121*01	IGKV14-100*01	IGKV17-121*01	IGKV17-121*01	IGKV14-100*01	IGKV4-70*01		IGKV9-124*01	IGKV17-121*01
	IGKV9-120*01	IGKV14-100*01	IGKV9-120*01	IGKV14-100*01	IGKV9-120*01	IGKV8-30*01	IGKV9-120*01 F	IGKV9-120*01 F	IGKV14-100*01	IGKV9-120*01	IGKV14-100*01	IGKV17-121*01	IGKV14-100*01	IGKV17-121*01	IGKV4-91*01	IGKV14-100*01	IGKV4-70*01		IGKV9-124*01	IGKV17-121*01
	IGKV9-120*01	IGKV14-100*01	IGKV9-120*01	IGKV14-100*01	IGKV9-120*01	IGKV8-30*01	IGKV9-120*01 F	IGKV9-120*01 F	IGKV8-19*01	IGKV9-120*01	IGKV9-120*01	IGKV17-121*01	IGKV14-100*01	IGKV17-121*01	IGKV17-121*01	IGKV14-100*01	IGKV4-70*01		IGKV9-124*01	IGKV17-121*01
	IGKV9-120*01	IGKV14-100*01	IGKV9-120*01	IGKV14-100*01	IGKV9-120*01	IGKV9-120*01	IGKV9-120*01 F	IGKV9-120*01 F	IGKV14-100*01	IGKV9-120*01	IGKV14-100*01	IGKV17-121*01	IGKV14-100*01	IGKV17-121*01	IGKV17-121*01	IGKV14-100*01	IGKV4-70*01		IGKV9-124*01	IGKV17-121*01
	IGKV9-120*01	IGKV14-100*01	IGKV9-120*01	IGKV14-100*01	IGKV9-120*01	IGKV9-120*01	IGKV9-120*01 F	IGKV9-120*01 F	IGKV14-100*01	IGKV9-120*01	IGKV14-100*01	IGKV17-121*01	IGKV14-100*01	IGKV17-121*01	IGKV17-121*01	IGKV14-100*01	IGKV4-70*01		IGKV9-124*01	IGKV17-121*01
	IGKV9-120*01	IGKV14-100*01	IGKV9-120*01	IGKV14-100*01	IGKV9-120*01	IGKV8-30*01	IGKV9-120*01 F	IGKV9-120*01 F	IGKV14-100*01	IGKV9-120*01	IGKV14-100*01	IGKV17-121*01	IGKV14-100*01	IGKV17-121*01	IGKV4-91*01	IGKV14-100*01	IGKV4-70*01		IGKV9-124*01	IGKV17-121*01
	IGKV9-120*01	IGKV14-100*01	IGKV9-120*01	IGKV14-100*01	IGKV9-120*01	IGKV8-30*01	IGKV9-120*01 F	IGKV14-111*01 F	IGKV14-100*01	IGKV9-120*01	IGKV14-100*01	IGKV17-121*01	IGKV14-100*01	IGKV17-121*01	IGKV17-121*01	IGKV14-100*01	IGKV4-70*01		IGKV9-124*01	IGKV17-121*01
	IGKV9-120*01	IGKV14-100*01	IGKV9-120*01	IGKV14-100*01	IGKV9-120*01	IGKV8-30*01	IGKV9-120*01 F	IGKV9-120*01 F	IGKV14-100*01	IGKV9-120*01	IGKV14-100*01	IGKV17-121*01	IGKV14-100*01	IGKV17-121*01	IGKV17-121*01	IGKV14-100*01	IGKV4-70*01		IGKV9-124*01	IGKV4-68*01
	IGKV9-120*01	IGKV14-100*01	IGKV9-120*01	IGKV14-100*01	IGKV9-120*01	IGKV9-120*01	IGKV9-120*01 F	IGKV1-135*01 F	IGKV14-100*01	IGKV9-120*01	IGKV9-120*01	IGKV17-121*01	IGKV14-100*01	IGKV17-121*01	IGKV17-121*01	IGKV14-100*01	IGKV4-70*01		IGKV9-124*01	IGKV17-121*01
	IGKV9-120*01	IGKV14-100*01	IGKV9-120*01	IGKV14-100*01	IGKV9-120*01	IGKV8-30*01	IGKV9-120*01 F	IGKV3-4*01 F	IGKV14-100*01	IGKV9-120*01	IGKV14-100*01	IGKV17-121*01	IGKV14-100*01	IGKV17-121*01	IGKV17-121*01	IGKV14-100*01	IGKV4-70*01		IGKV9-124*01	IGKV17-121*01
	IGKV9-120*01	IGKV14-100*01	IGKV9-120*01	IGKV14-100*01	IGKV9-120*01	IGKV9-120*01	IGKV9-120*01 F	IGKV9-120*01 F	IGKV17-121*01	IGKV9-120*01	IGKV14-100*01	IGKV17-121*01	IGKV9-120*01	IGKV17-121*01	IGKV17-121*01	IGKV14-100*01	IGKV4-70*01		IGKV9-124*01	IGKV17-121*01
	IGKV9-120*01	IGKV14-100*01	IGKV9-120*01	IGKV14-100*01	IGKV9-120*01	IGKV9-120*01	IGKV9-120*01 F	IGKV9-120*01 F	IGKV14-100*01	IGKV9-120*01	IGKV14-100*01	IGKV17-121*01	IGKV9-120*01	IGKV17-121*01	IGKV4-91*01	IGKV14-100*01	IGKV4-70*01		IGKV9-124*01	IGKV17-121*01
	IGKV9-120*01	IGKV14-100*01	IGKV9-120*01	IGKV14-100*01	IGKV9-120*01	IGKV8-30*01	IGKV9-120*01 F	IGKV14-111*01 F	IGKV17-121*01	IGKV9-120*01	IGKV14-100*01	IGKV17-121*01	IGKV14-100*01	IGKV17-121*01	IGKV4-91*01	IGKV14-100*01	IGKV4-70*01		IGKV9-124*01	IGKV17-121*01
	IGKV9-120*01	IGKV14-100*01	IGKV9-120*01	IGKV14-100*01	IGKV9-120*01	IGKV8-30*01	IGKV9-120*01 F	IGKV9-120*01 F	IGKV4-91*01	IGKV9-120*01	IGKV14-100*01	IGKV17-121*01	IGKV14-100*01	IGKV17-121*01	IGKV17-121*01	IGKV14-100*01	IGKV4-70*01		IGKV9-124*01	IGKV17-121*01
	IGKV9-120*01	IGKV14-100*01	IGKV9-120*01	IGKV14-100*01	IGKV9-120*01	IGKV8-30*01	IGKV9-120*01 F	IGKV9-120*01 F	IGKV14-100*01	IGKV9-120*01	IGKV9-120*01	IGKV17-121*01	IGKV14-100*01	IGKV17-121*01	IGKV17-121*01	IGKV14-100*01	IGKV4-70*01		IGKV9-124*01	IGKV17-121*01
	IGKV9-120*01	IGKV14-100*01	IGKV9-120*01	IGKV14-100*01	IGKV9-120*01	IGKV9-120*01	IGKV9-120*01 F	IGKV9-120*01 F	IGKV14-100*01	IGKV9-120*01	IGKV14-100*01	IGKV17-121*01	IGKV9-120*01	IGKV17-121*01	IGKV17-121*01	IGKV14-100*01	IGKV4-70*01		IGKV9-124*01	IGKV17-121*01
	IGKV9-120*01	IGKV14-100*01	IGKV9-120*01	IGKV14-100*01	IGKV9-120*01	IGKV8-30*01	IGKV9-120*01 F	IGKV9-120*01 F	IGKV14-100*01	IGKV9-120*01	IGKV9-120*01	IGKV17-121*01	IGKV9-120*01	IGKV17-121*01	IGKV4-91*01	IGKV14-100*01	IGKV4-70*01		IGKV9-124*01	IGKV17-121*01
	IGKV9-120*01	IGKV14-100*01	IGKV9-120*01	IGKV14-100*01	IGKV9-120*01	IGKV9-120*01	IGKV9-120*01 F	IGKV14-111*01 F	IGKV1-135*01	IGKV9-120*01	IGKV14-100*01	IGKV17-121*01	IGKV14-100*01	IGKV17-121*01	IGKV4-91*01	IGKV14-100*01	IGKV4-70*01		IGKV9-124*01	IGKV17-121*01
	IGKV9-120*01	IGKV14-100*01	IGKV9-120*01	IGKV14-100*01	IGKV9-120*01	IGKV9-120*01	IGKV9-120*01 F	IGKV9-120*01 F	IGKV14-100*01	IGKV9-120*01	IGKV14-100*01	IGKV17-121*01	IGKV9-120*01	IGKV17-121*01	IGKV4-91*01	IGKV14-100*01	IGKV4-70*01		IGKV9-124*01	IGKV17-121*01
	IGKV9-120*01	IGKV14-100*01	IGKV9-120*01	IGKV14-100*01	IGKV9-120*01	IGKV8-30*01	IGKV9-120*01 F	IGKV9-120*01 F	IGKV9-120*01	IGKV9-120*01	IGKV14-100*01	IGKV17-121*01	IGKV14-100*01	IGKV17-121*01	IGKV4-91*01	IGKV14-100*01	IGKV4-70*01		IGKV9-124*01	IGKV17-121*01
	IGKV9-120*01	IGKV14-100*01	IGKV9-120*01	IGKV14-100*01	IGKV9-120*01	IGKV8-30*01	IGKV9-120*01 F	IGKV14-111*01 F	IGKV14-100*01	IGKV9-120*01	IGKV14-100*01	IGKV17-121*01	IGKV14-100*01	IGKV17-121*01	IGKV17-121*01	IGKV14-100*01	IGKV4-70*01		IGKV9-124*01	IGKV17-121*01
[truncated: 7,284 more rows]
